# Supplementary material for: N-Phenacyldibromobenzimidazoles—Synthesis Optimization and Evaluation of Their Cytotoxic Activity
Source: MDPI journal article supplement (doi:10.3390/molecules27144349), 2022-07-07

## ***N*-Phenacyldibromobenzimidazoles – synthesis optimization and evaluation of their cytotoxic activity**

**Anna Kowalkowska<sup>1,\*</sup>, Konrad Chojnacki<sup>1</sup>, Maciej Multan<sup>1</sup>, Jan K. Maurin<sup>2</sup>,  
Edyta Łukowska-Chojnacka<sup>1</sup> and Patrycja Wińska<sup>1</sup>**

<sup>1</sup> Warsaw University of Technology, Faculty of Chemistry, Noakowskiego St 3, 00-664 Warsaw, Poland, e-mail: [anna.kowalkowska@pw.edu.pl](mailto:anna.kowalkowska@pw.edu.pl), [konrad.chojnacki@pw.edu.pl](mailto:konrad.chojnacki@pw.edu.pl), [edyta.chojnacka@pw.edu.pl](mailto:edyta.chojnacka@pw.edu.pl), [patrycja.winska.pw.edu.pl](mailto:patrycja.winska.pw.edu.pl)

<sup>2</sup> National Medicines Institute, Chełmska St. 30/34, 00-725 Warsaw, Poland  
National Centre for Nuclear Research, Andrzeja Sołtana St. 7, 05-400 Otwock, Poland, e-mail: [j.maurin@nil.gov.pl](mailto:j.maurin@nil.gov.pl)

|                                                                              |          |
|------------------------------------------------------------------------------|----------|
| <b>1. HPLC analysis - general remarks</b>                                    | <b>2</b> |
| <b>2. HPLC chromatograms of optimization reactions (Table 1, Entry 1-35)</b> | <b>3</b> |

## 1. HPLC analysis - general remarks

HPLC analyses were performed on PE NELSON NCI900 chromatograph (Waltham, MA, USA) equipped with a UV-VIS (Perkin Elmer 785A detector, Waltham, MA, USA) and a reverse-phase column Hichrom HI-5C18-3959 (250 x 1.0 mm, 5  $\mu$ m). 10  $\mu$ l of sample was injected. A gradient method comprising water/ acetonitrile was applied as follows: 0-20 min 20/80 (1 ml/min), 20-25 min 20/80 – 0/100 (1 ml/min) 25-60 min 0/100 (1 ml/min). UV-VIS detector was set at a wavelength of 254 nm.

The calibration curve was prepared using seven concentrations of the model compound, 2-(5,6-dibromo-1*H*-benzimidazol-1-yl)-1-(2,4-dichlorophenyl)ethenone **4e** (1.520, 1.013, 0.676, 0.450, 0.300, 0.200, 0.133 mg/ml).

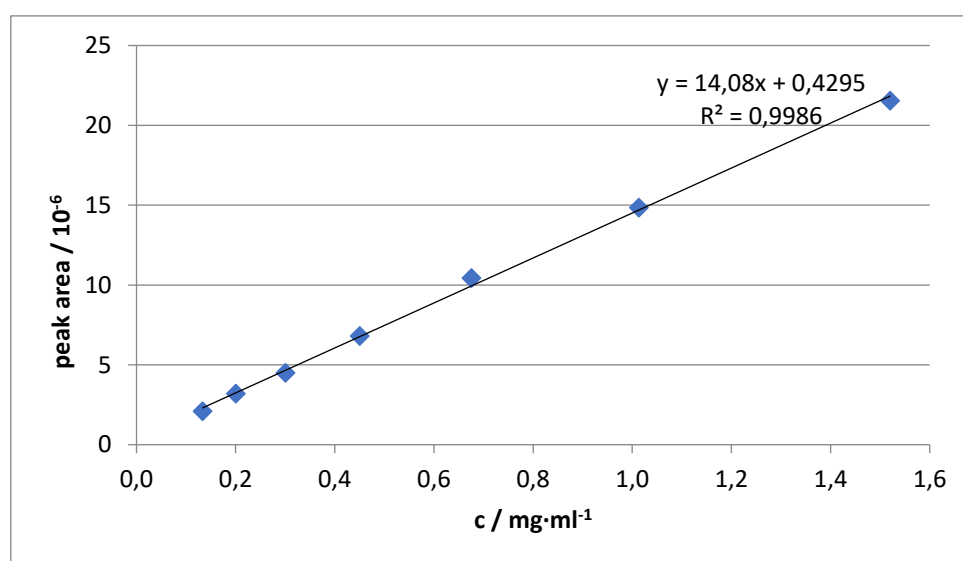

**Figure S1.** The calibration curve.

### Procedure for optimization reactions (see Table 1 in the manuscript).

To the 5,6-dibromobenzimidazole **1** (0.1 mmol, 27.6 mg) in a solvent (5 ml, see Table 1) 2,4-dichlorophenacyl chloride **3e** (see Table 1) was added, followed by a base (see Table 1). The mixture was magnetically stirred (temperature and time given in Table 1). The solvent was evaporated, H<sub>2</sub>O (10 ml) and CH<sub>2</sub>Cl<sub>2</sub> (10 ml) were added, the phases were separated, the water phase was extracted with CH<sub>2</sub>Cl<sub>2</sub> (2 x 10 ml), the combined organic phases were washed with H<sub>2</sub>O (2 x 10 ml), dried with MgSO<sub>4</sub> and evaporated to dryness. The residue was dissolved in the volumetric flask (5 ml) in THF and diluted with MeCN (50  $\mu$ l of THF solution + 250  $\mu$ l of MeCN). The concentration of the product **4e** was determined by HPLC, injecting 10  $\mu$ l of a sample.

# 1. HPLC chromatograms of optimizations reactions presented in Table 1.

Table 1, Entry 1

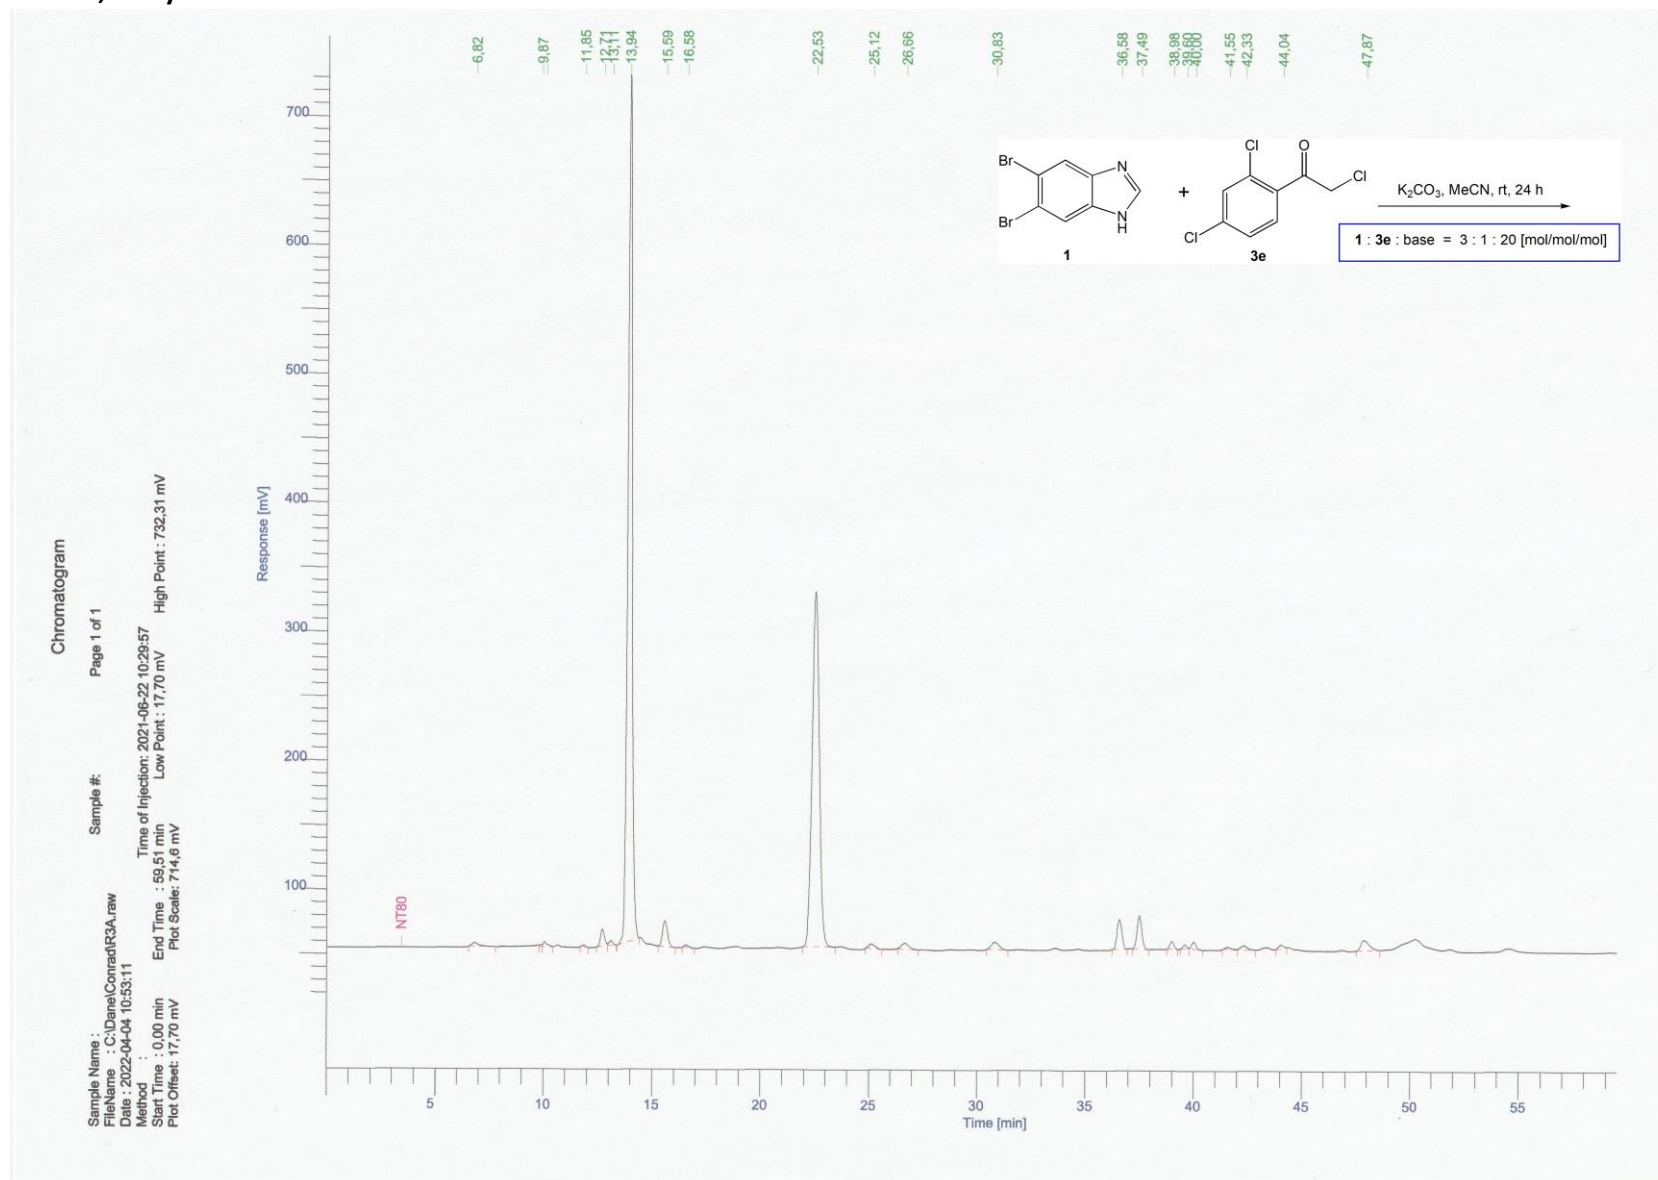

Table 1, Entry 2

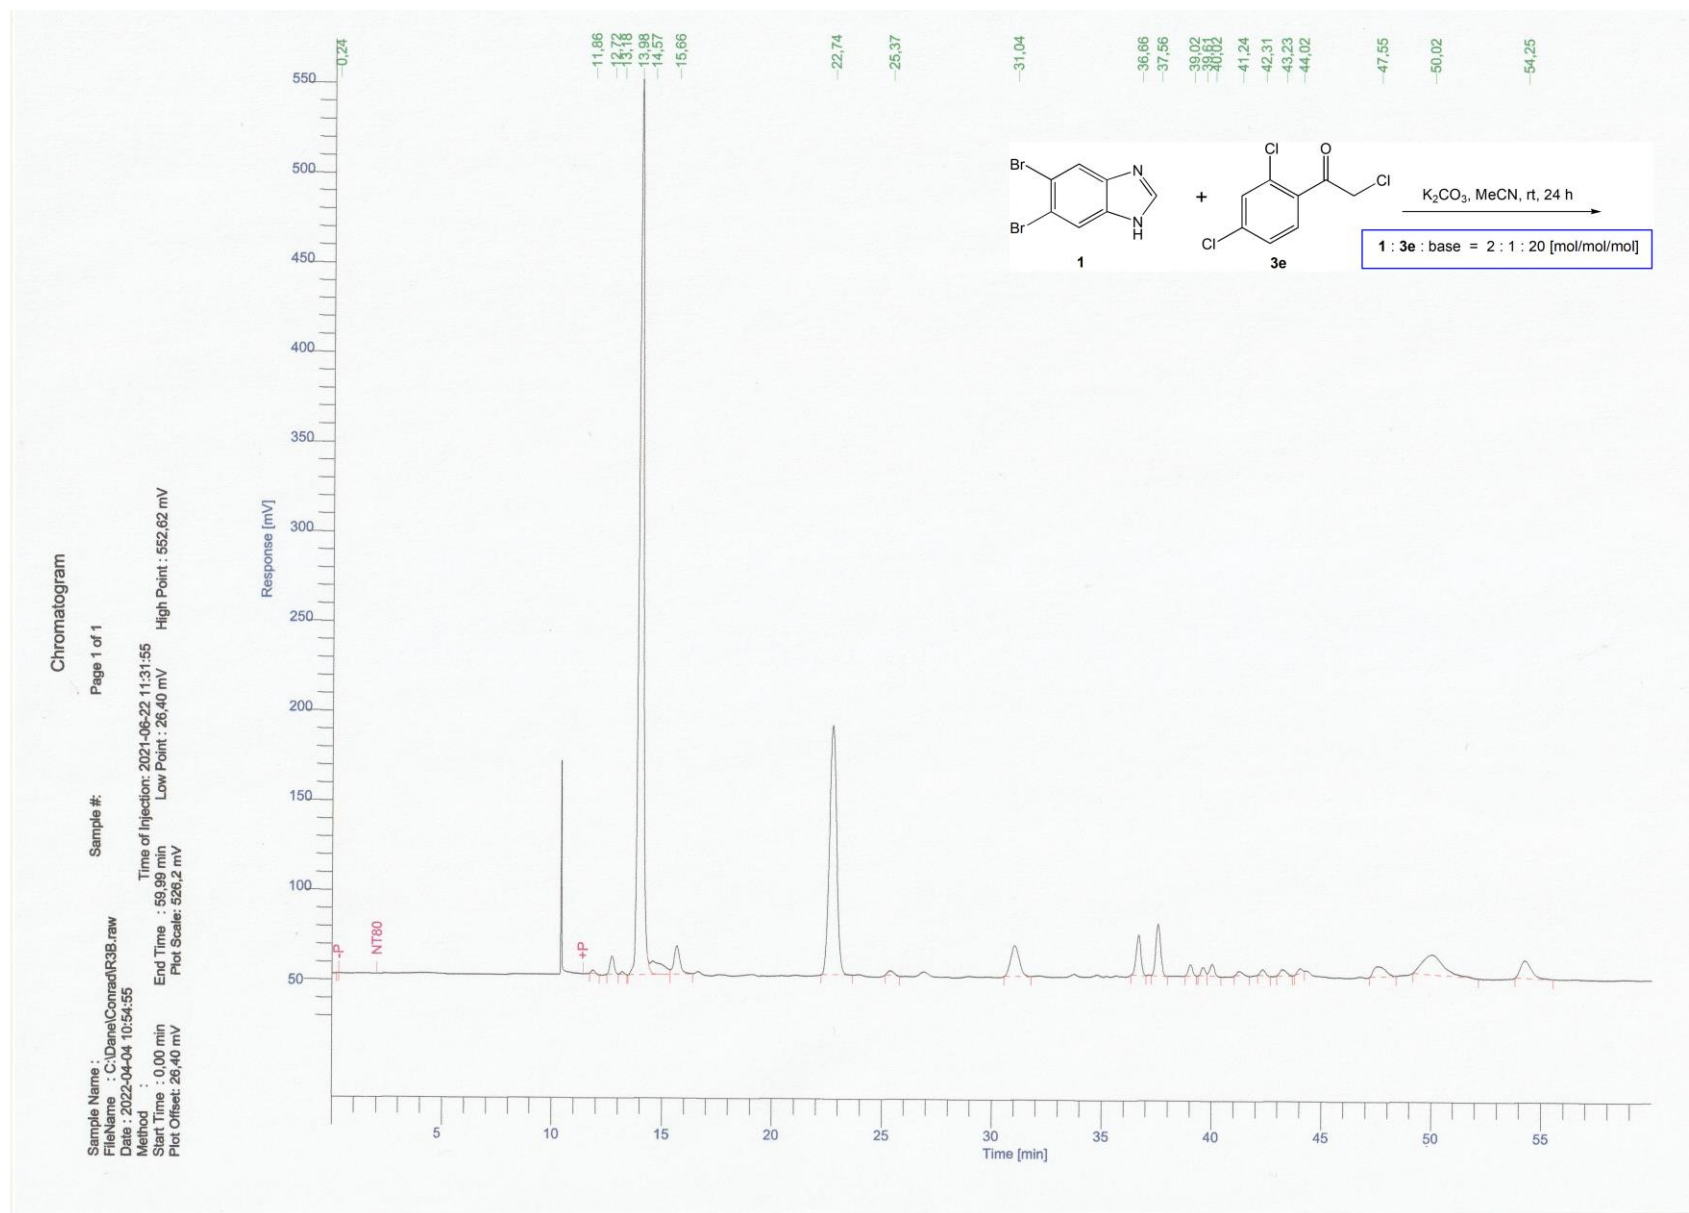

Table 1, Entry 3

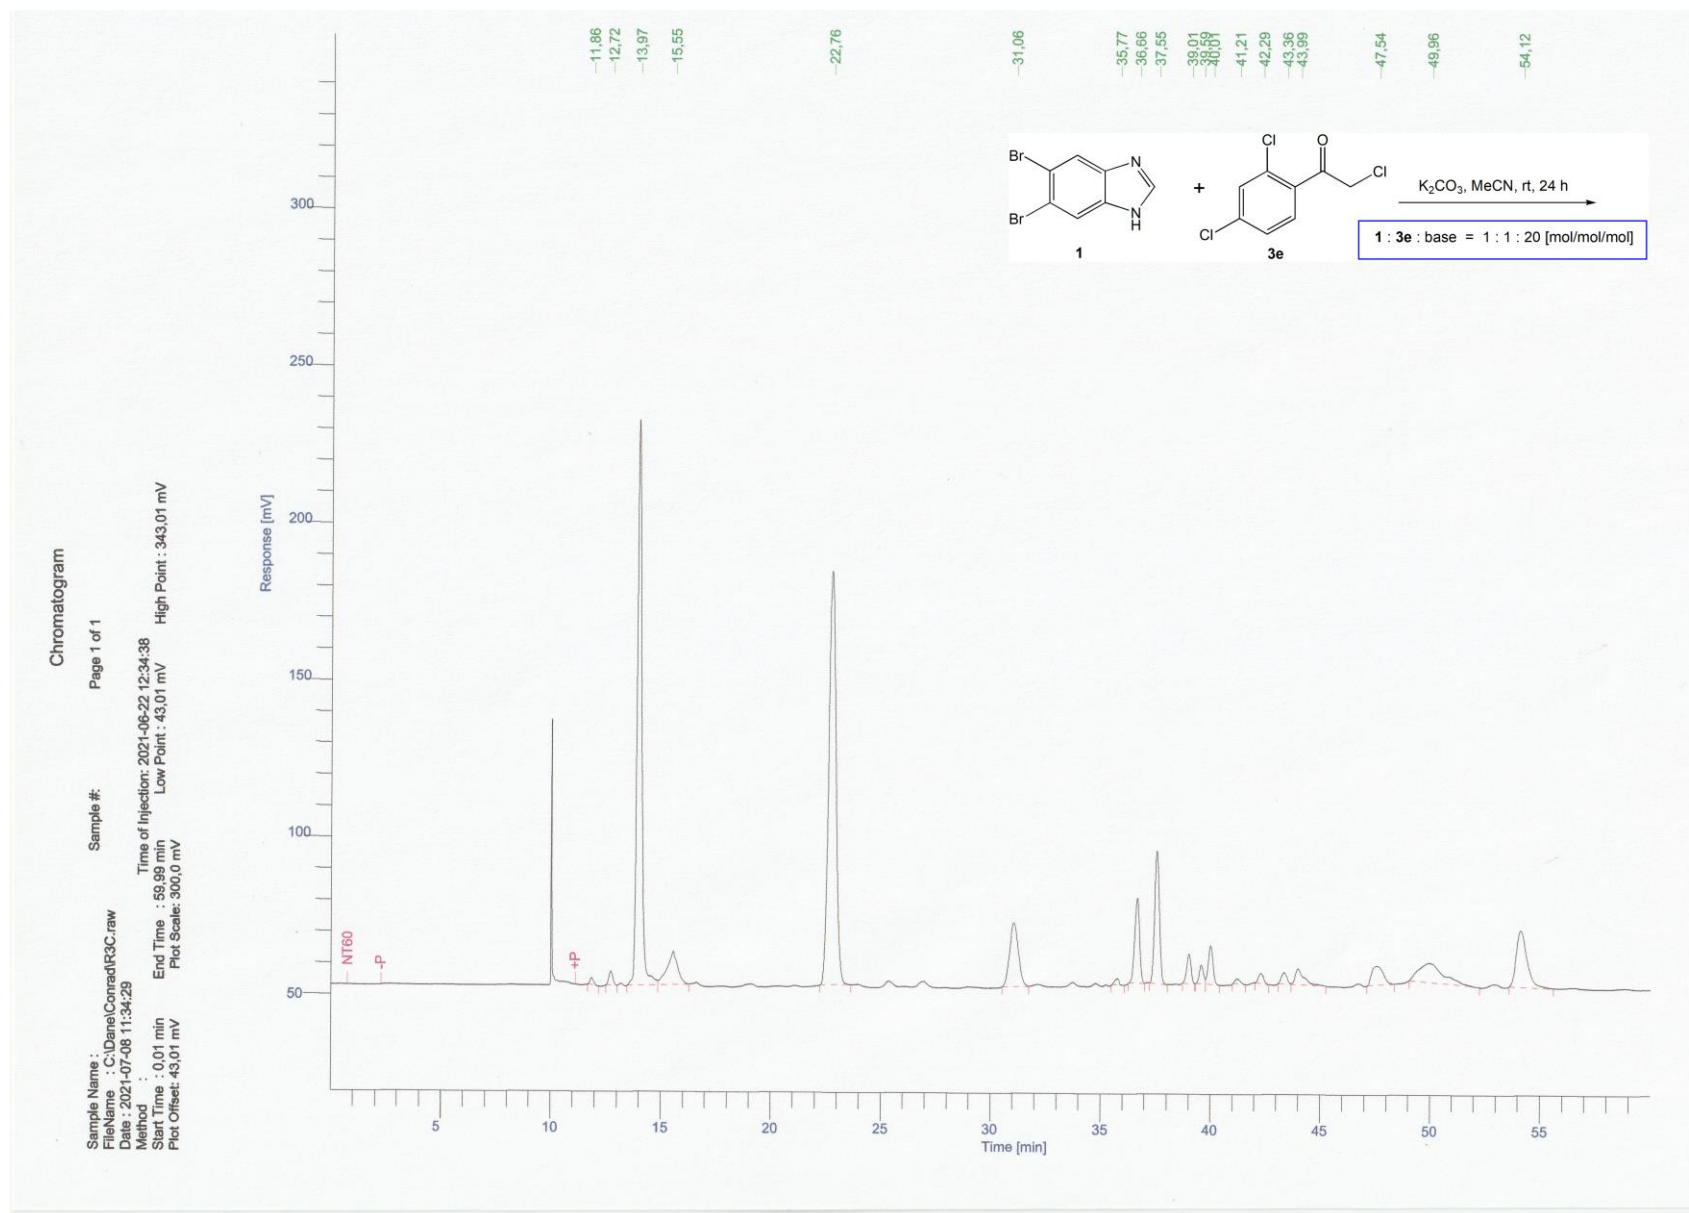

Table 1, Entry 4





Table 1, Entry 5

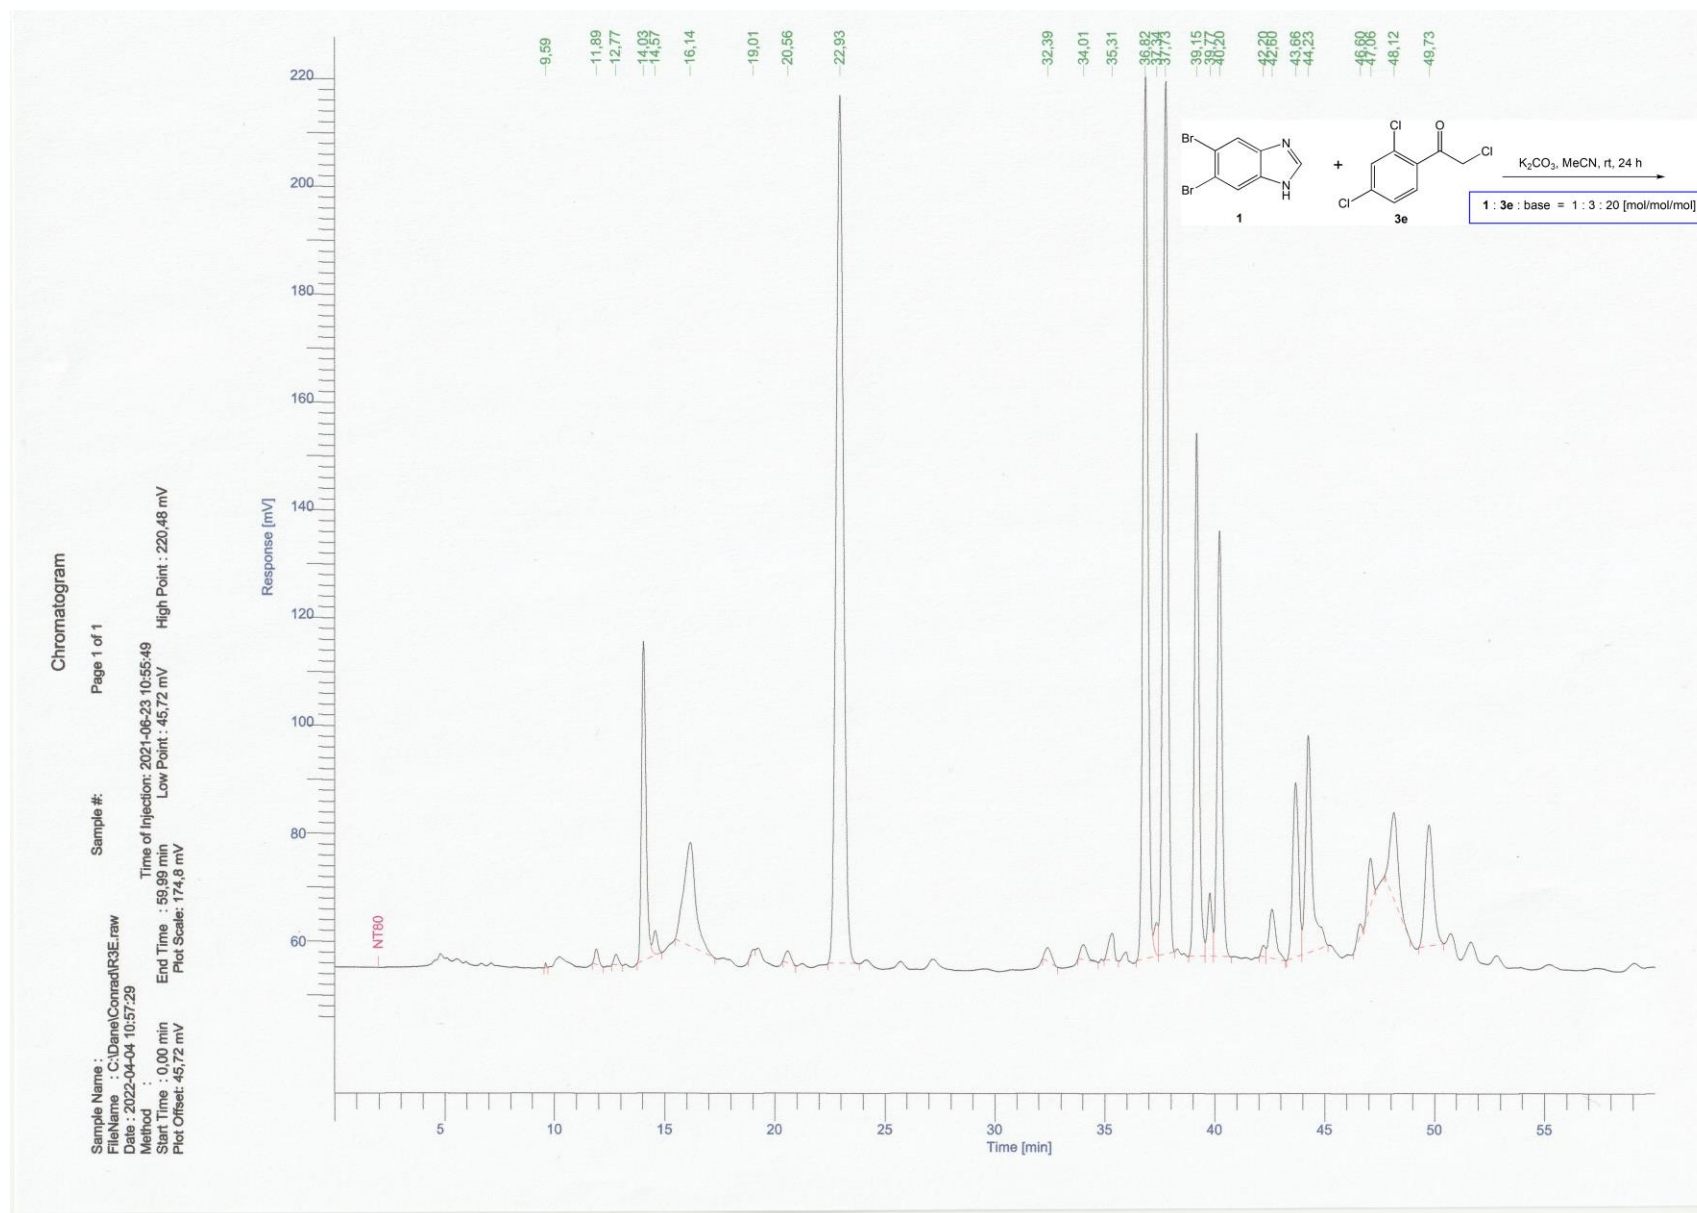

Table 1, Entry 6

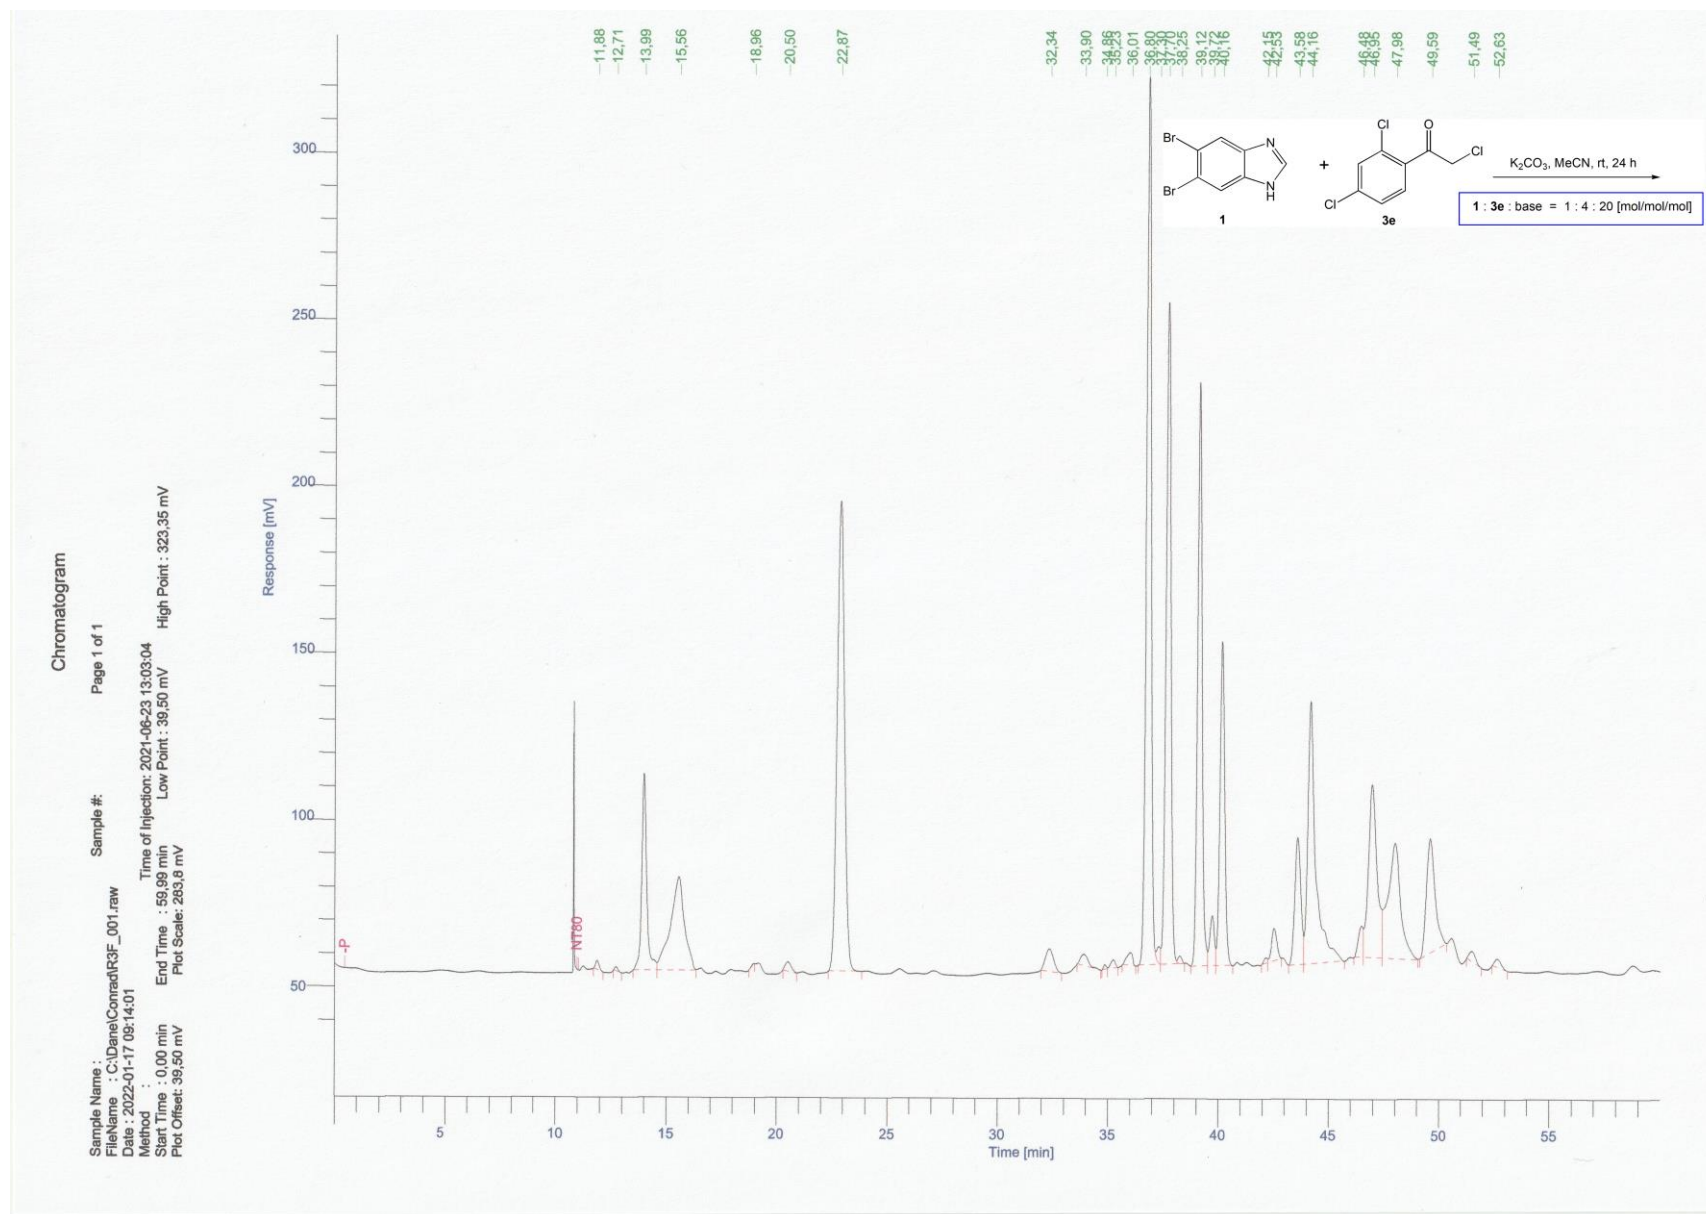



Table 1, Entry 7

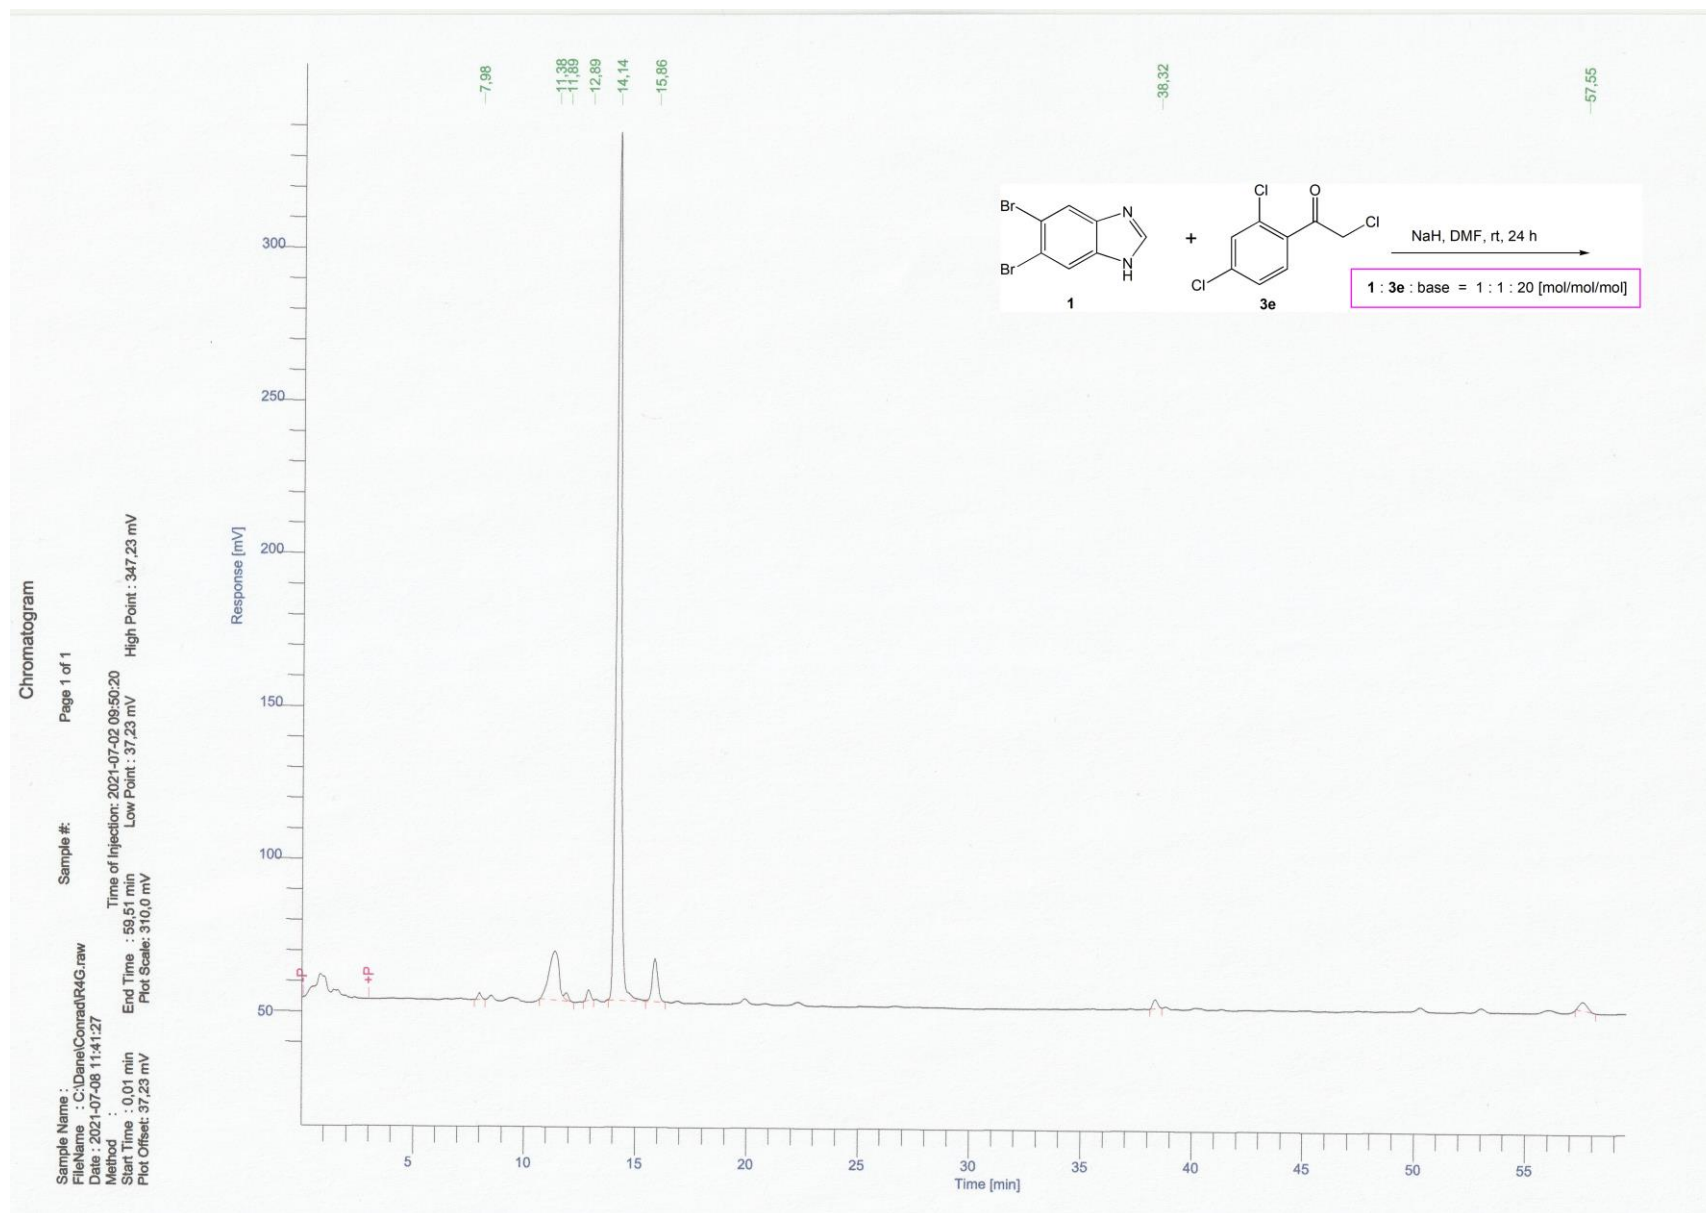

Table 1, Entry 8

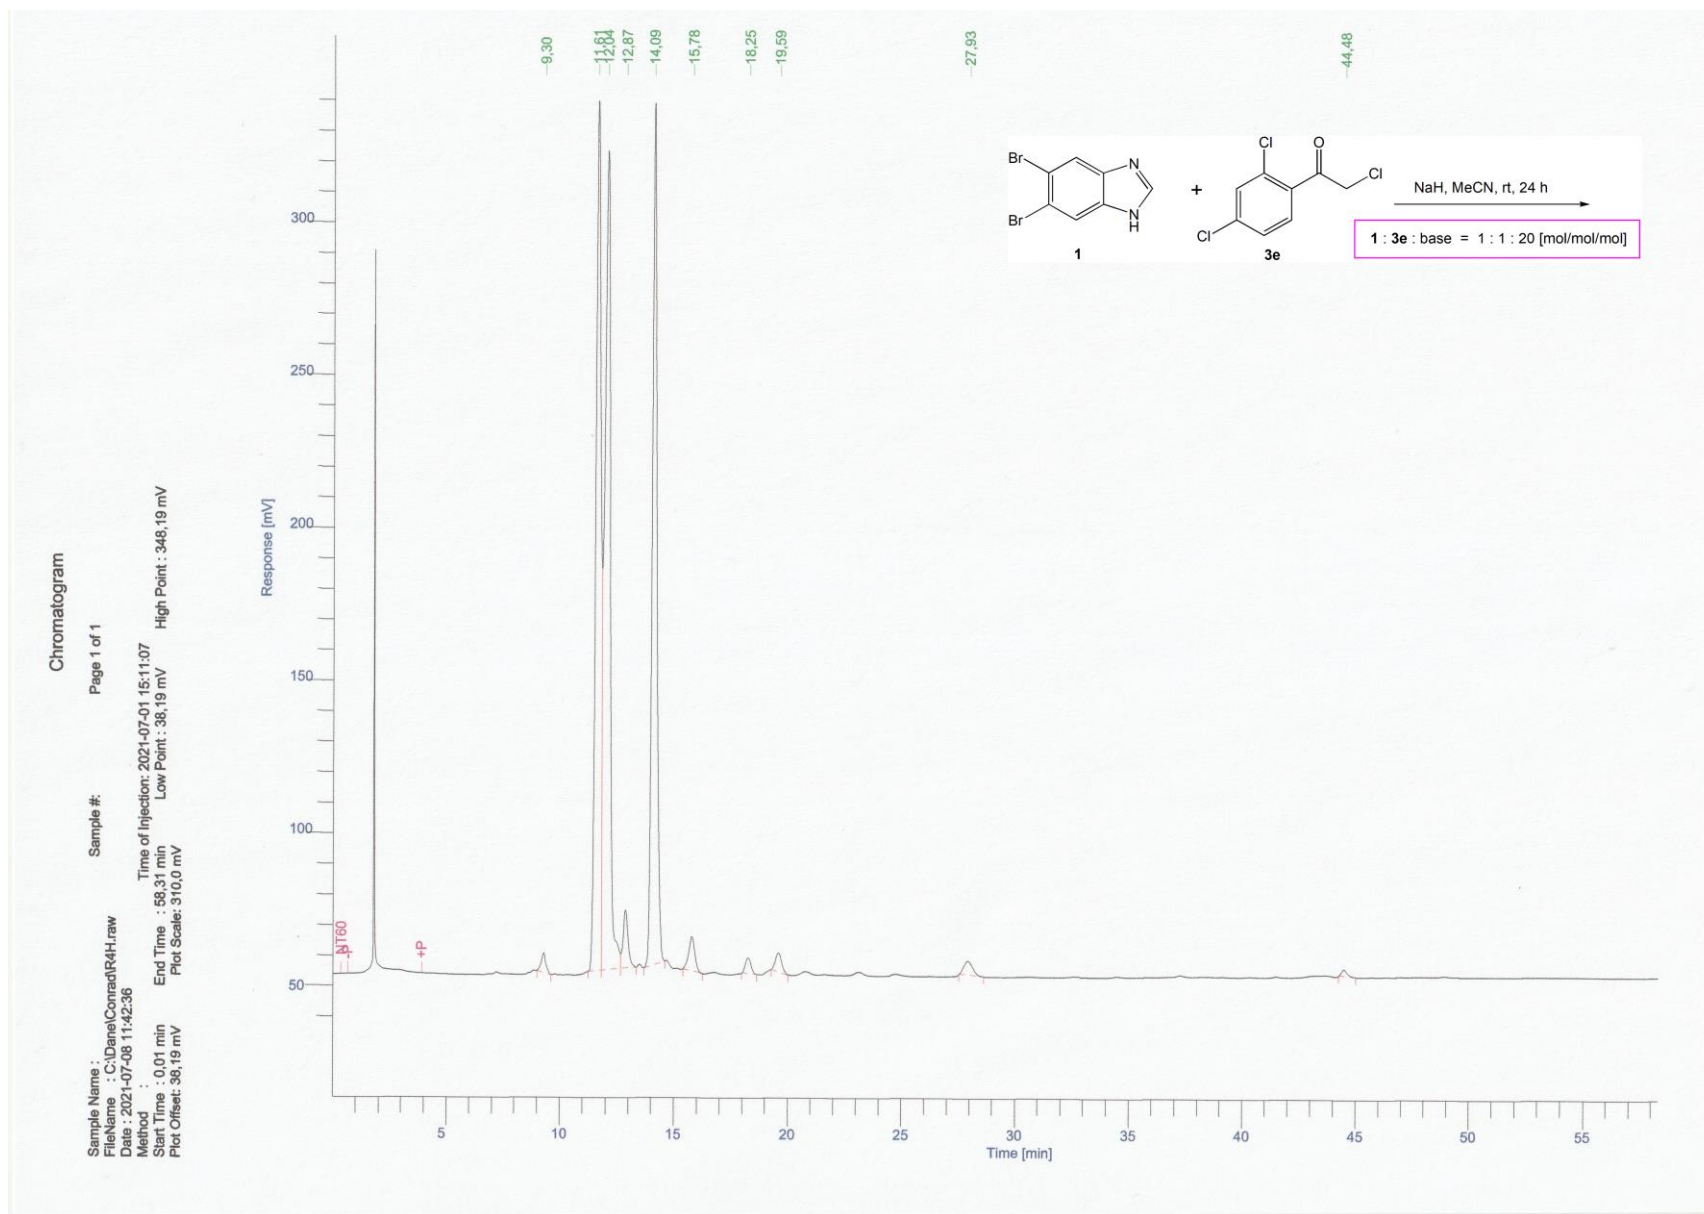

Table 1, Entry 9

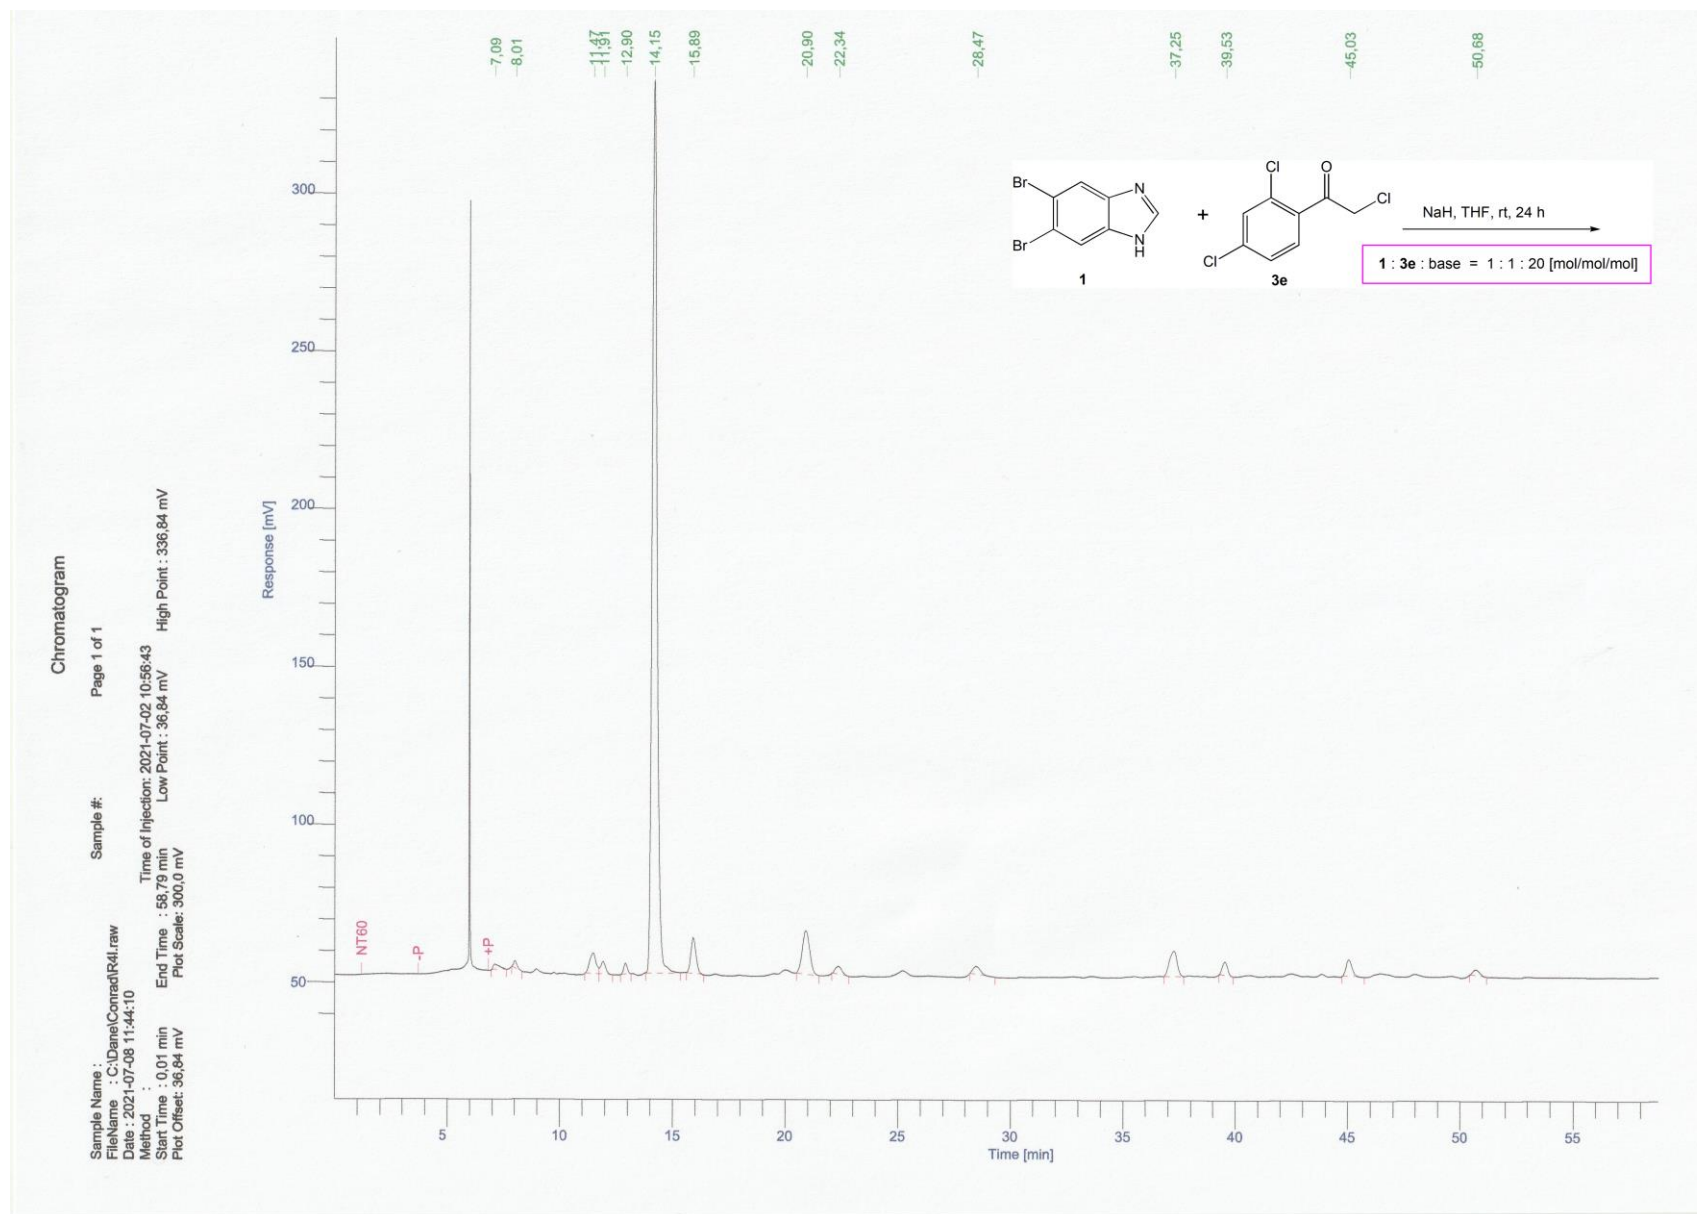

Table 1, Entry 10

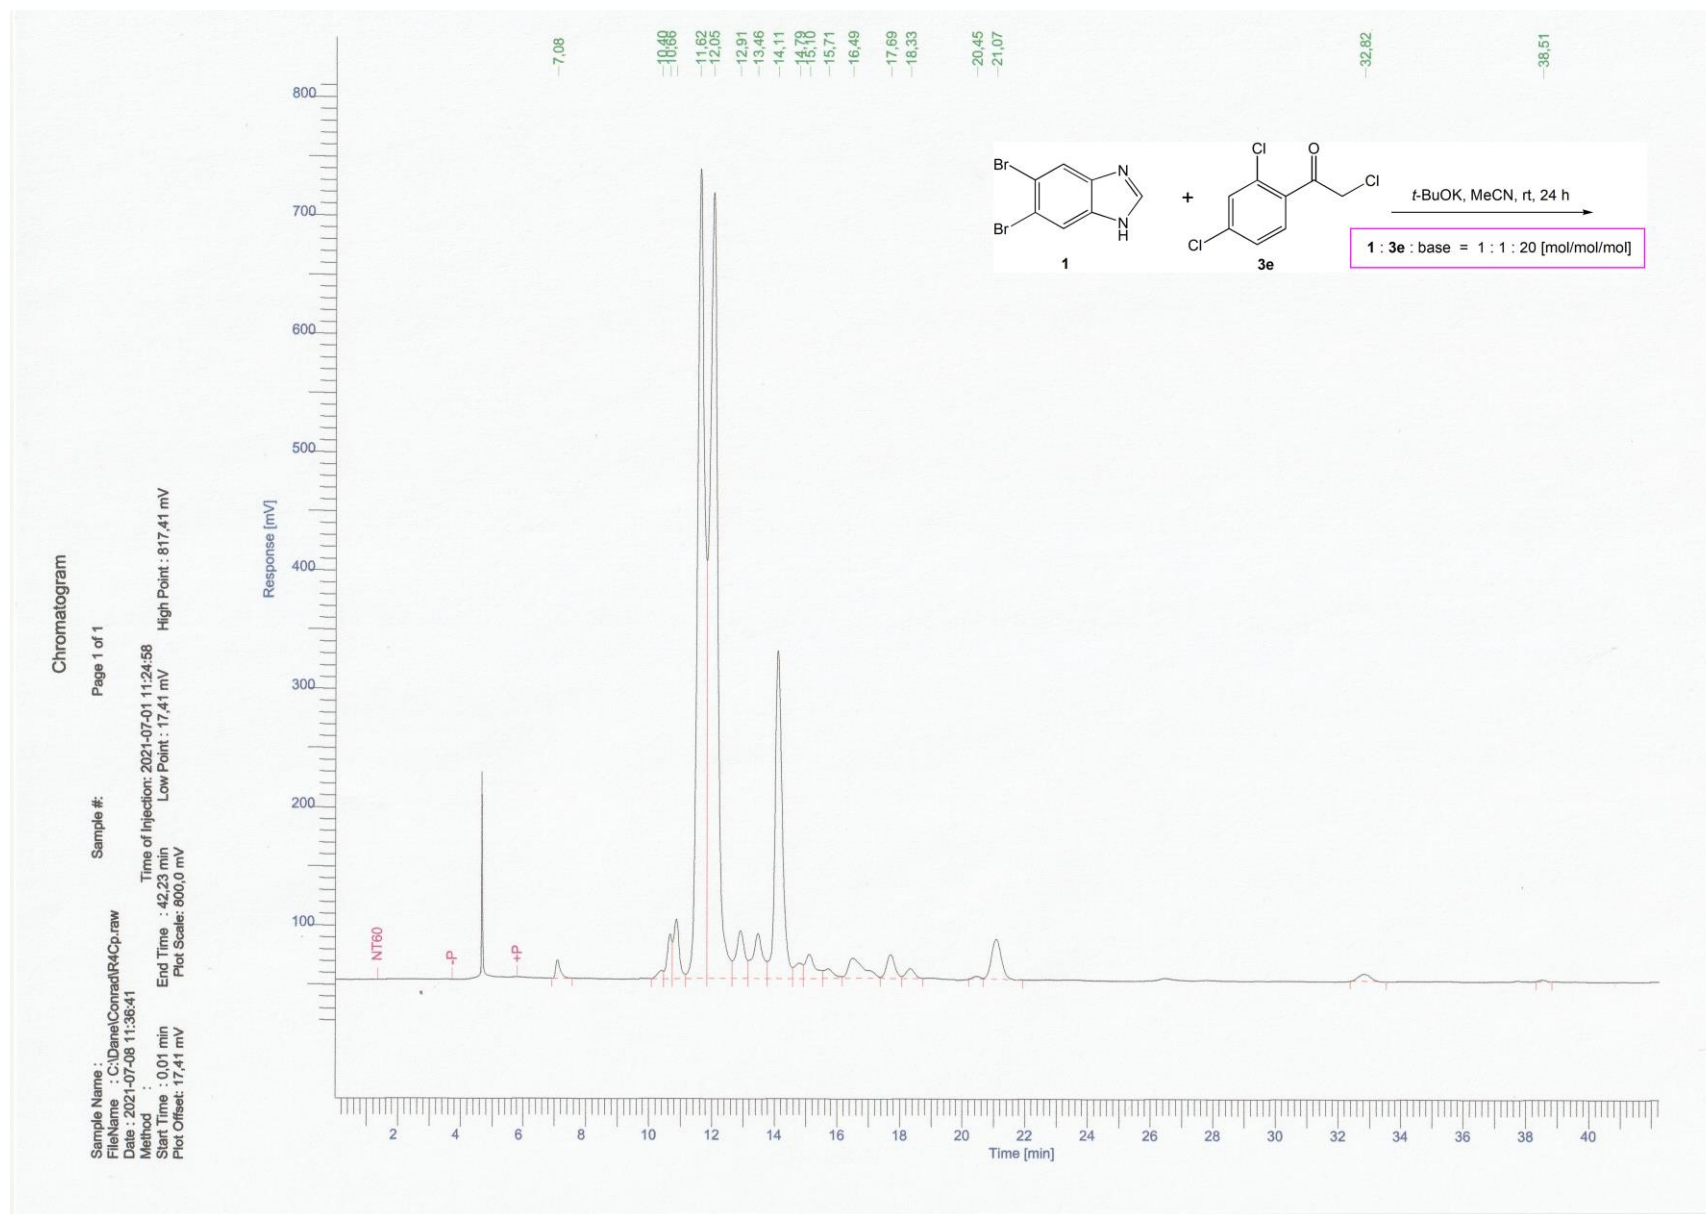

Table 1, Entry 11

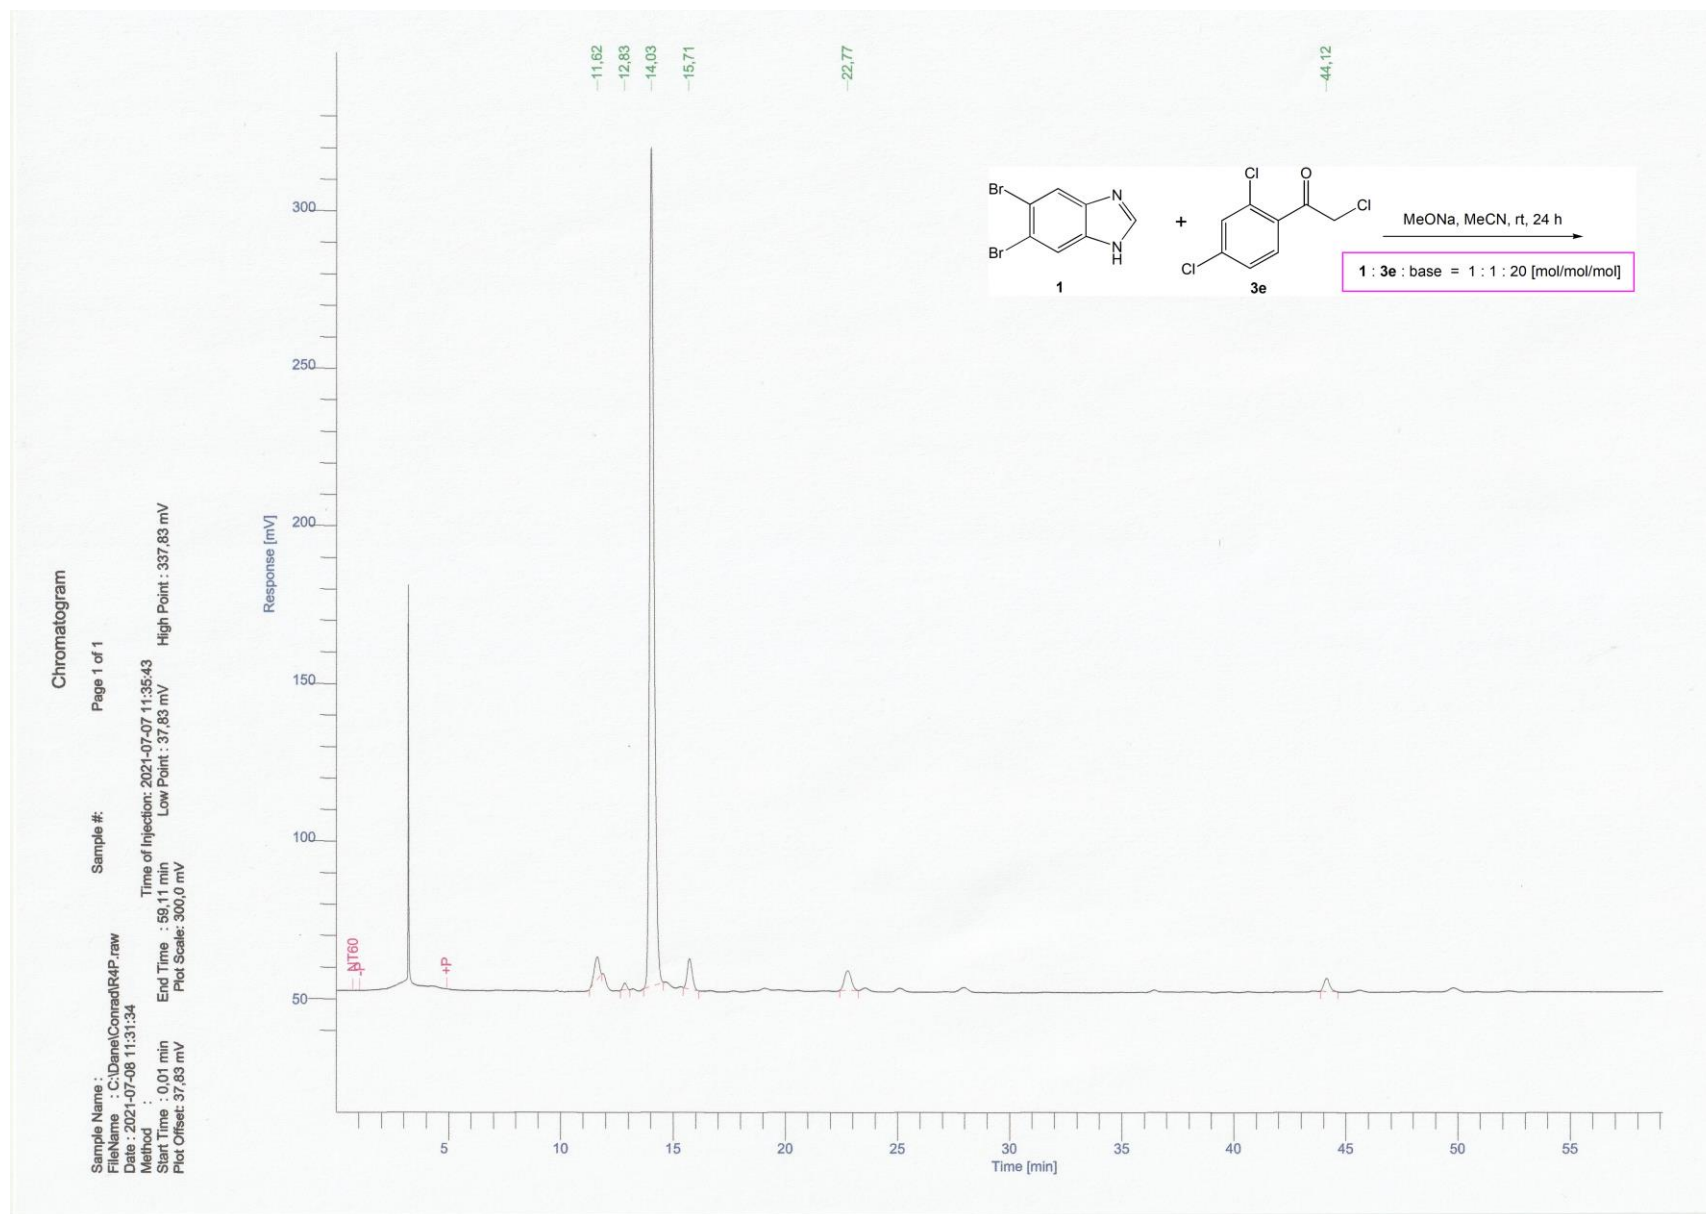



Table 1, Entry 12

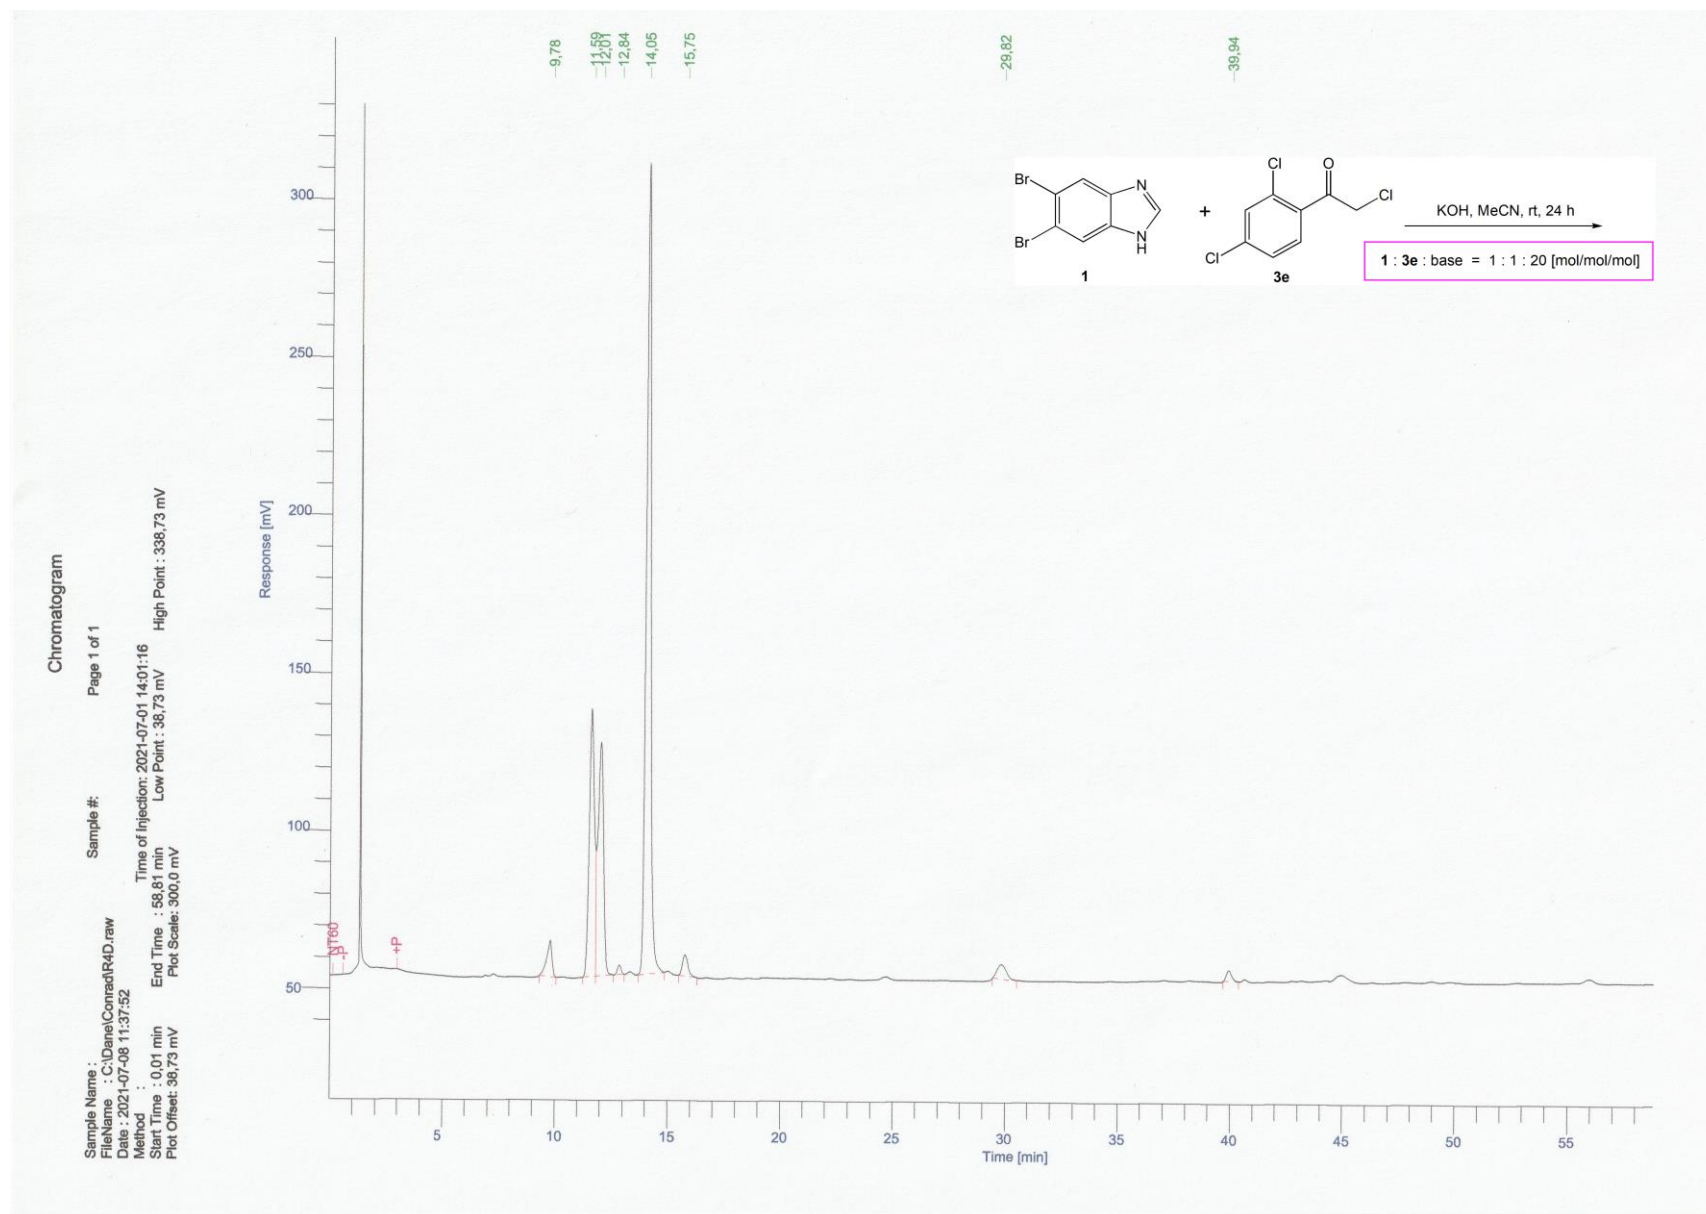

Table 1, Entry 13

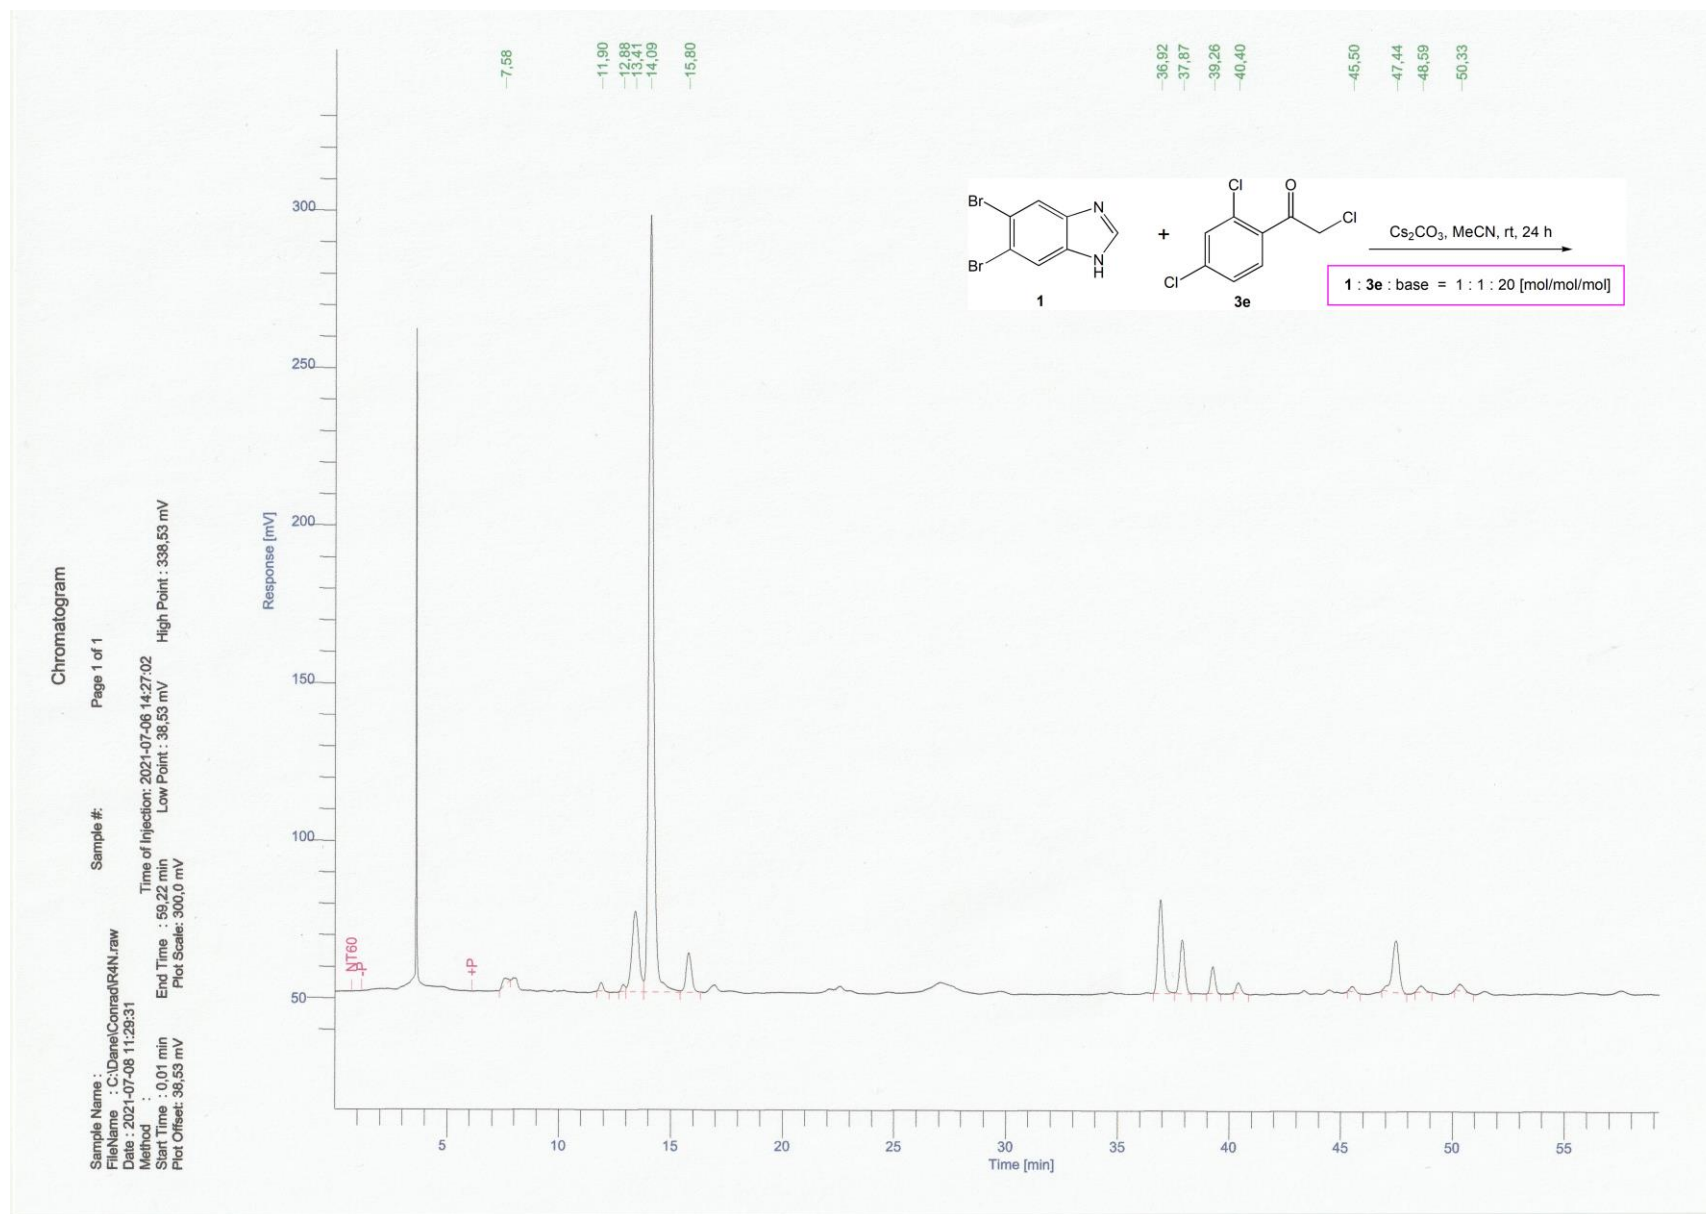

Table 1, Entry 14

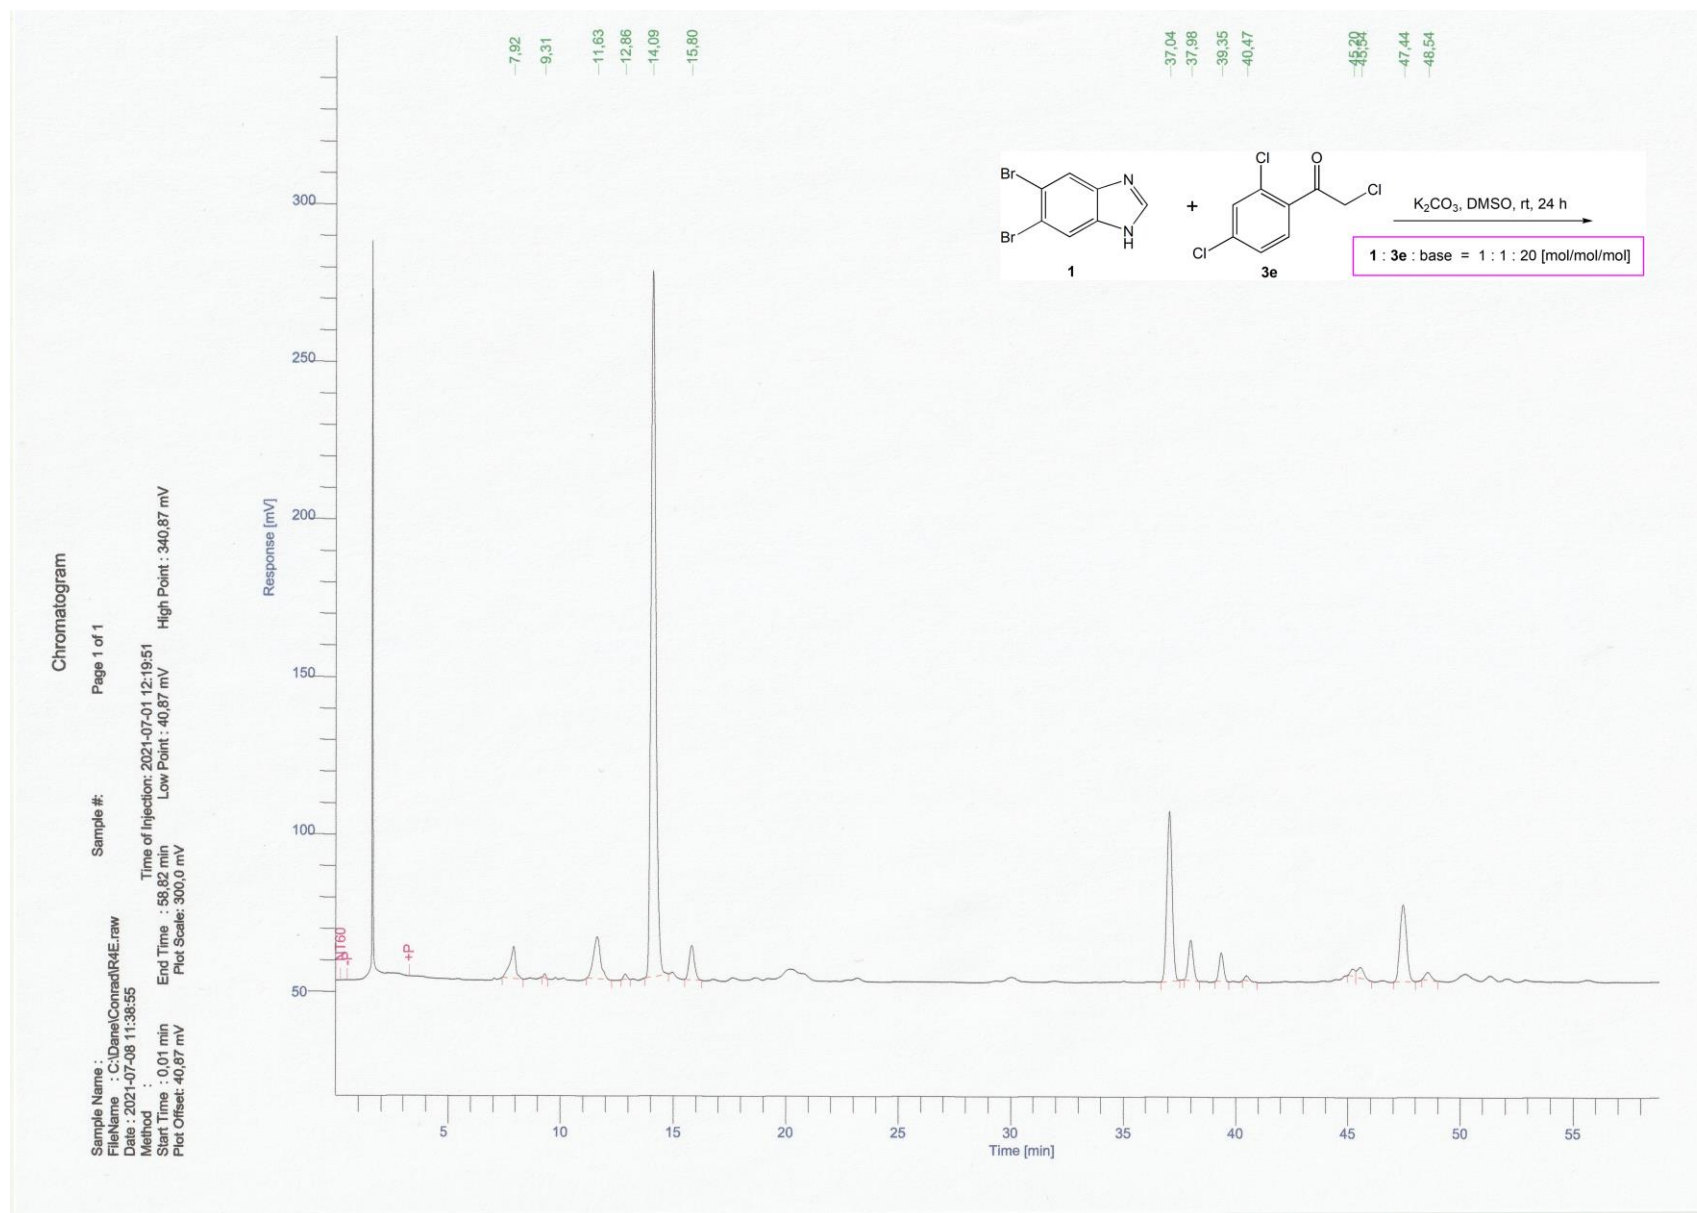

Table 1, Entry 15

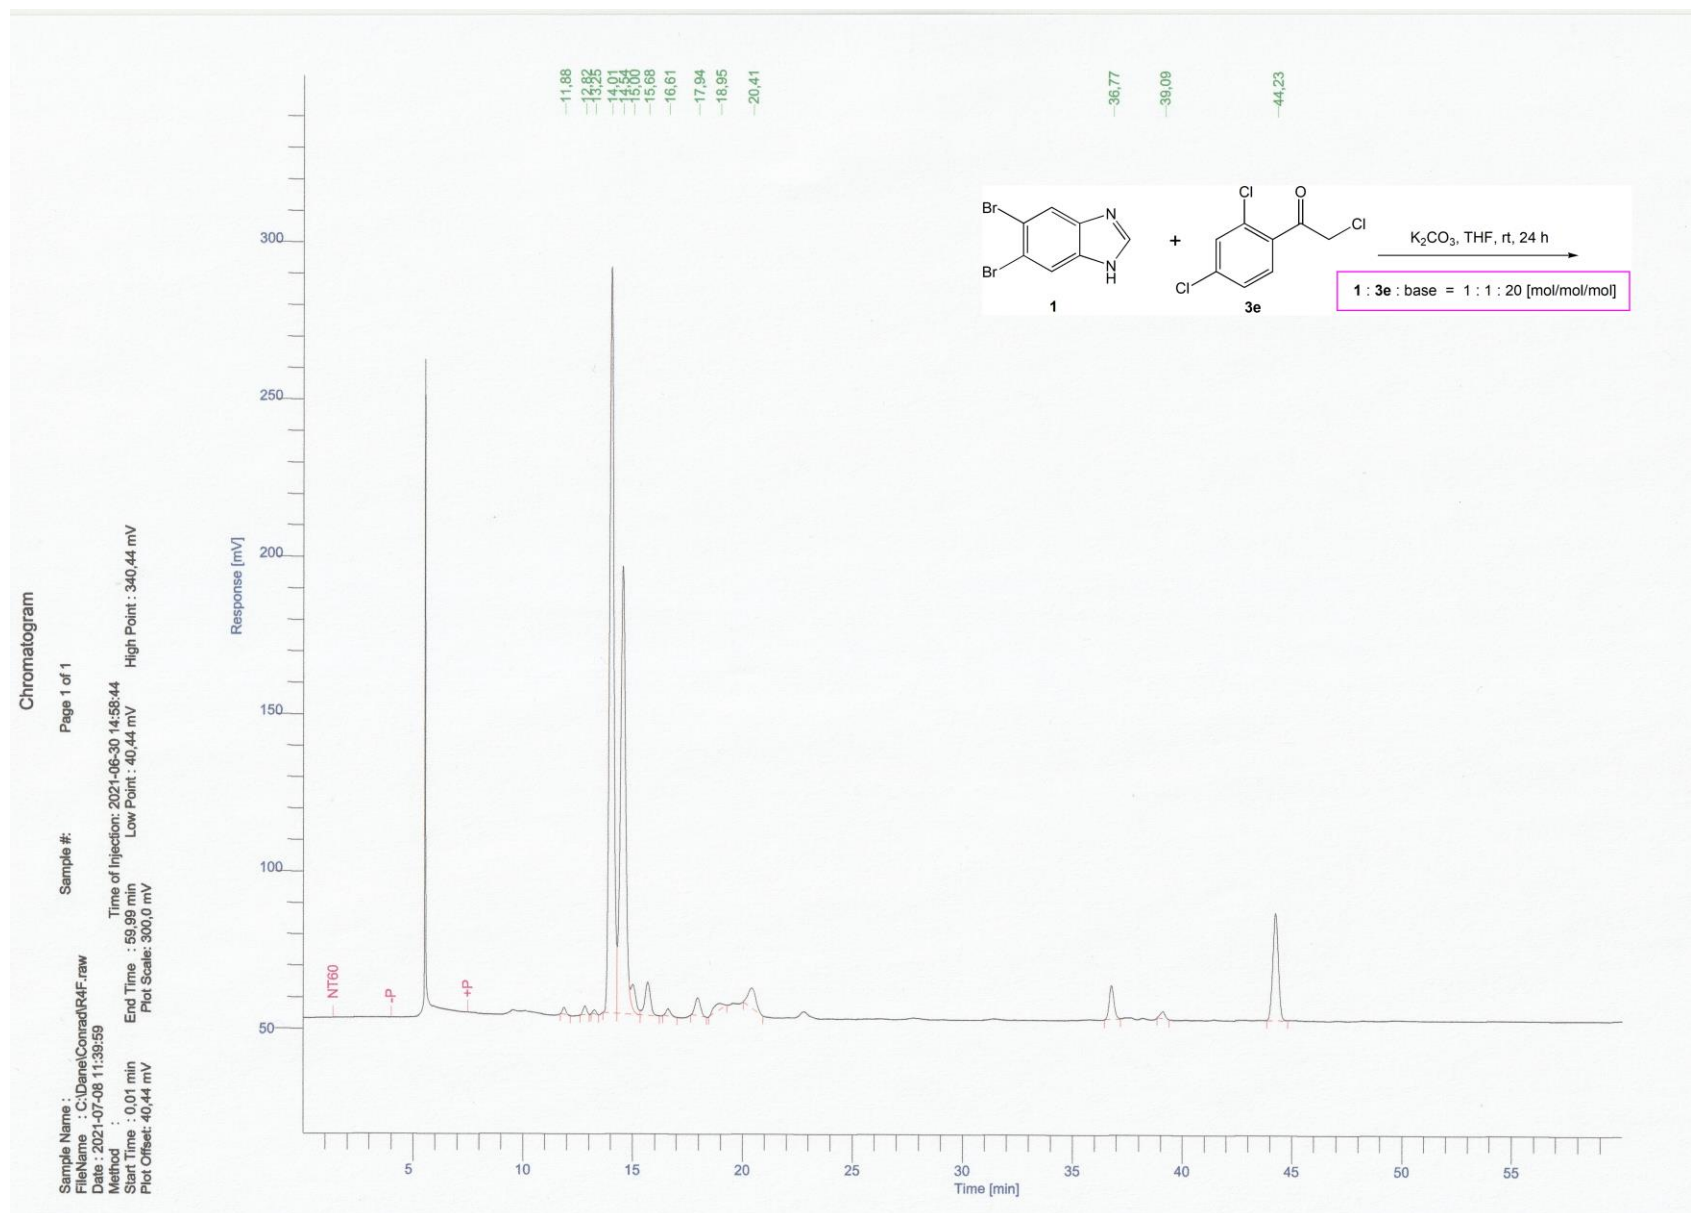

Table 1, Entry 16

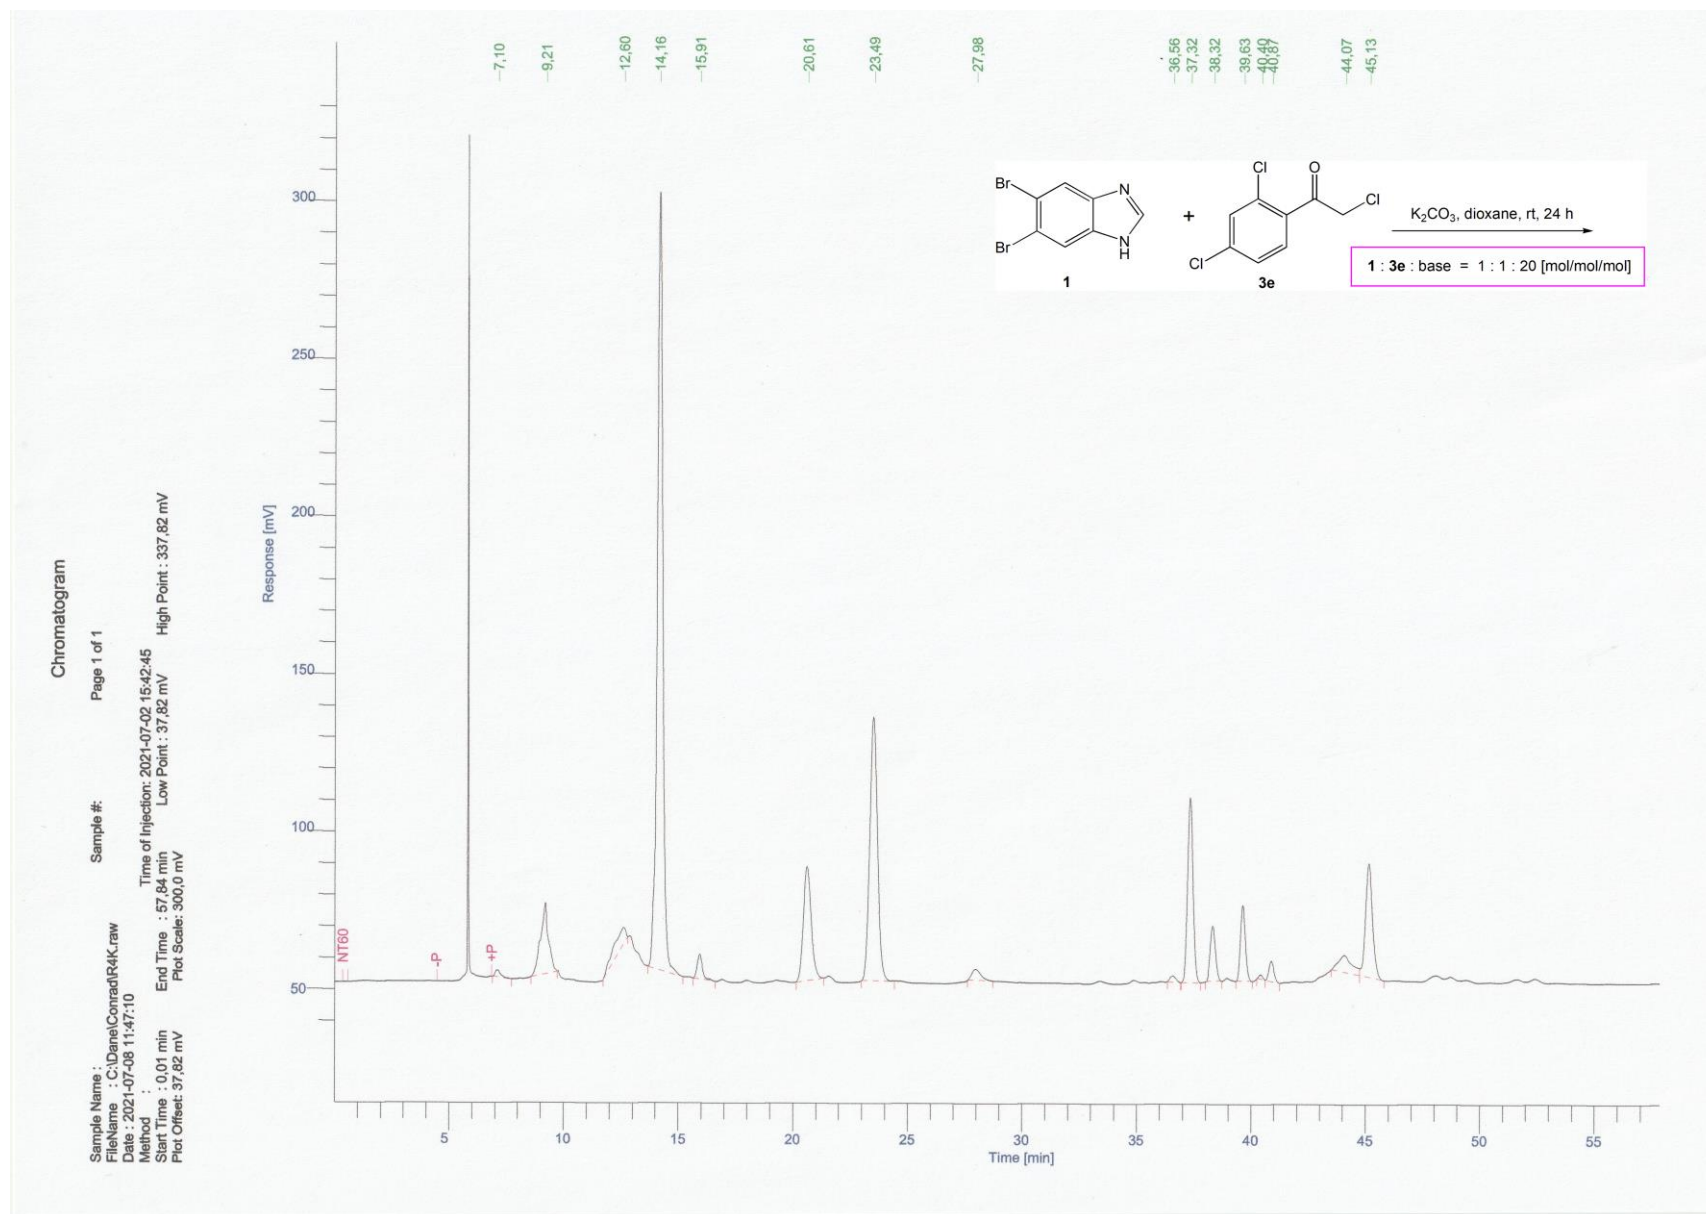



### Table 1, Entry 17

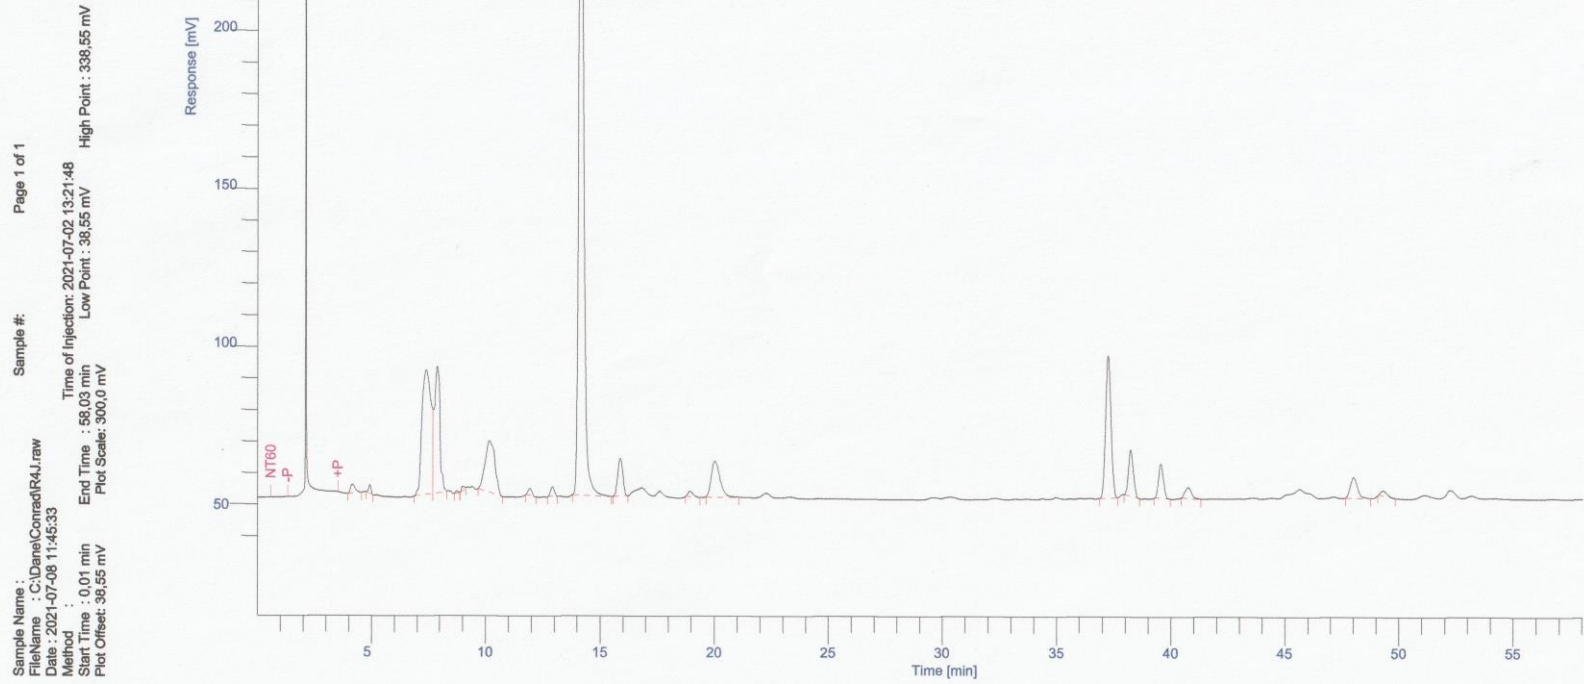

Table 1, Entry 18

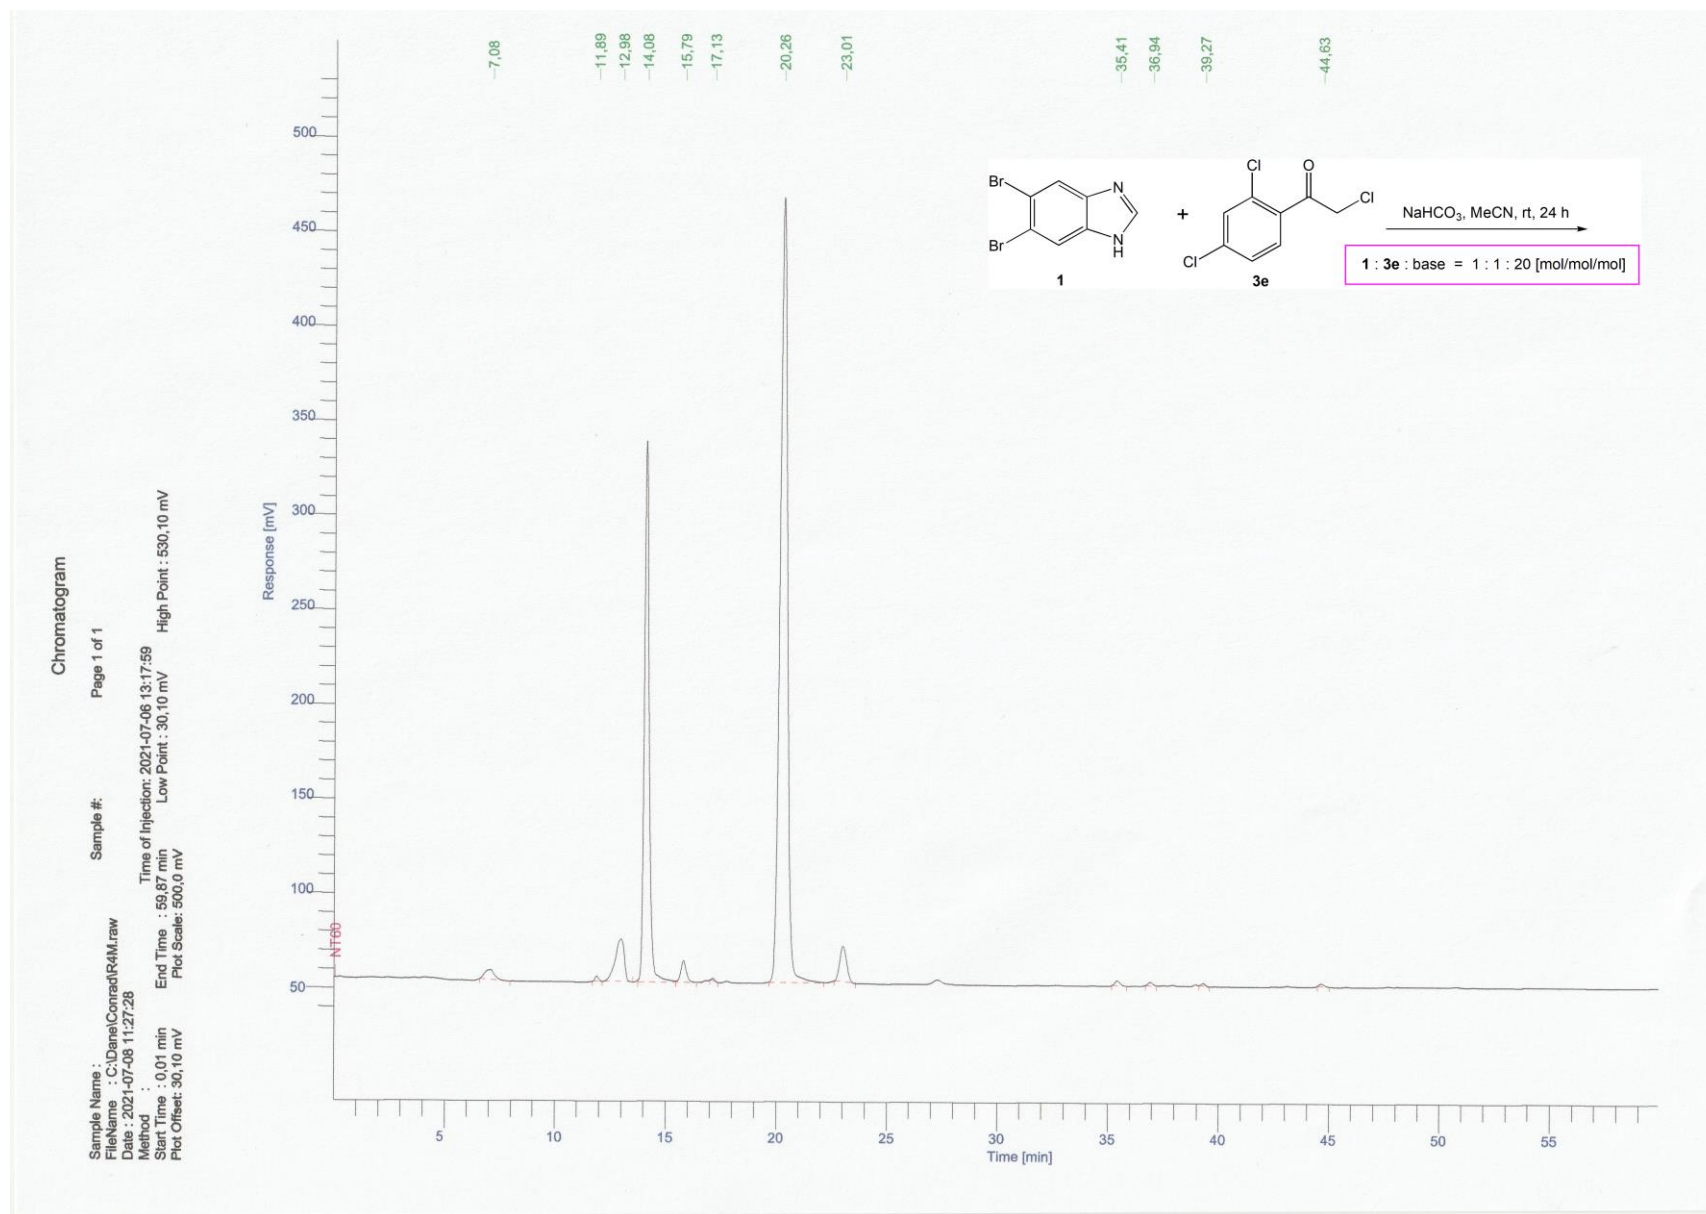

Table 1, Entry 19

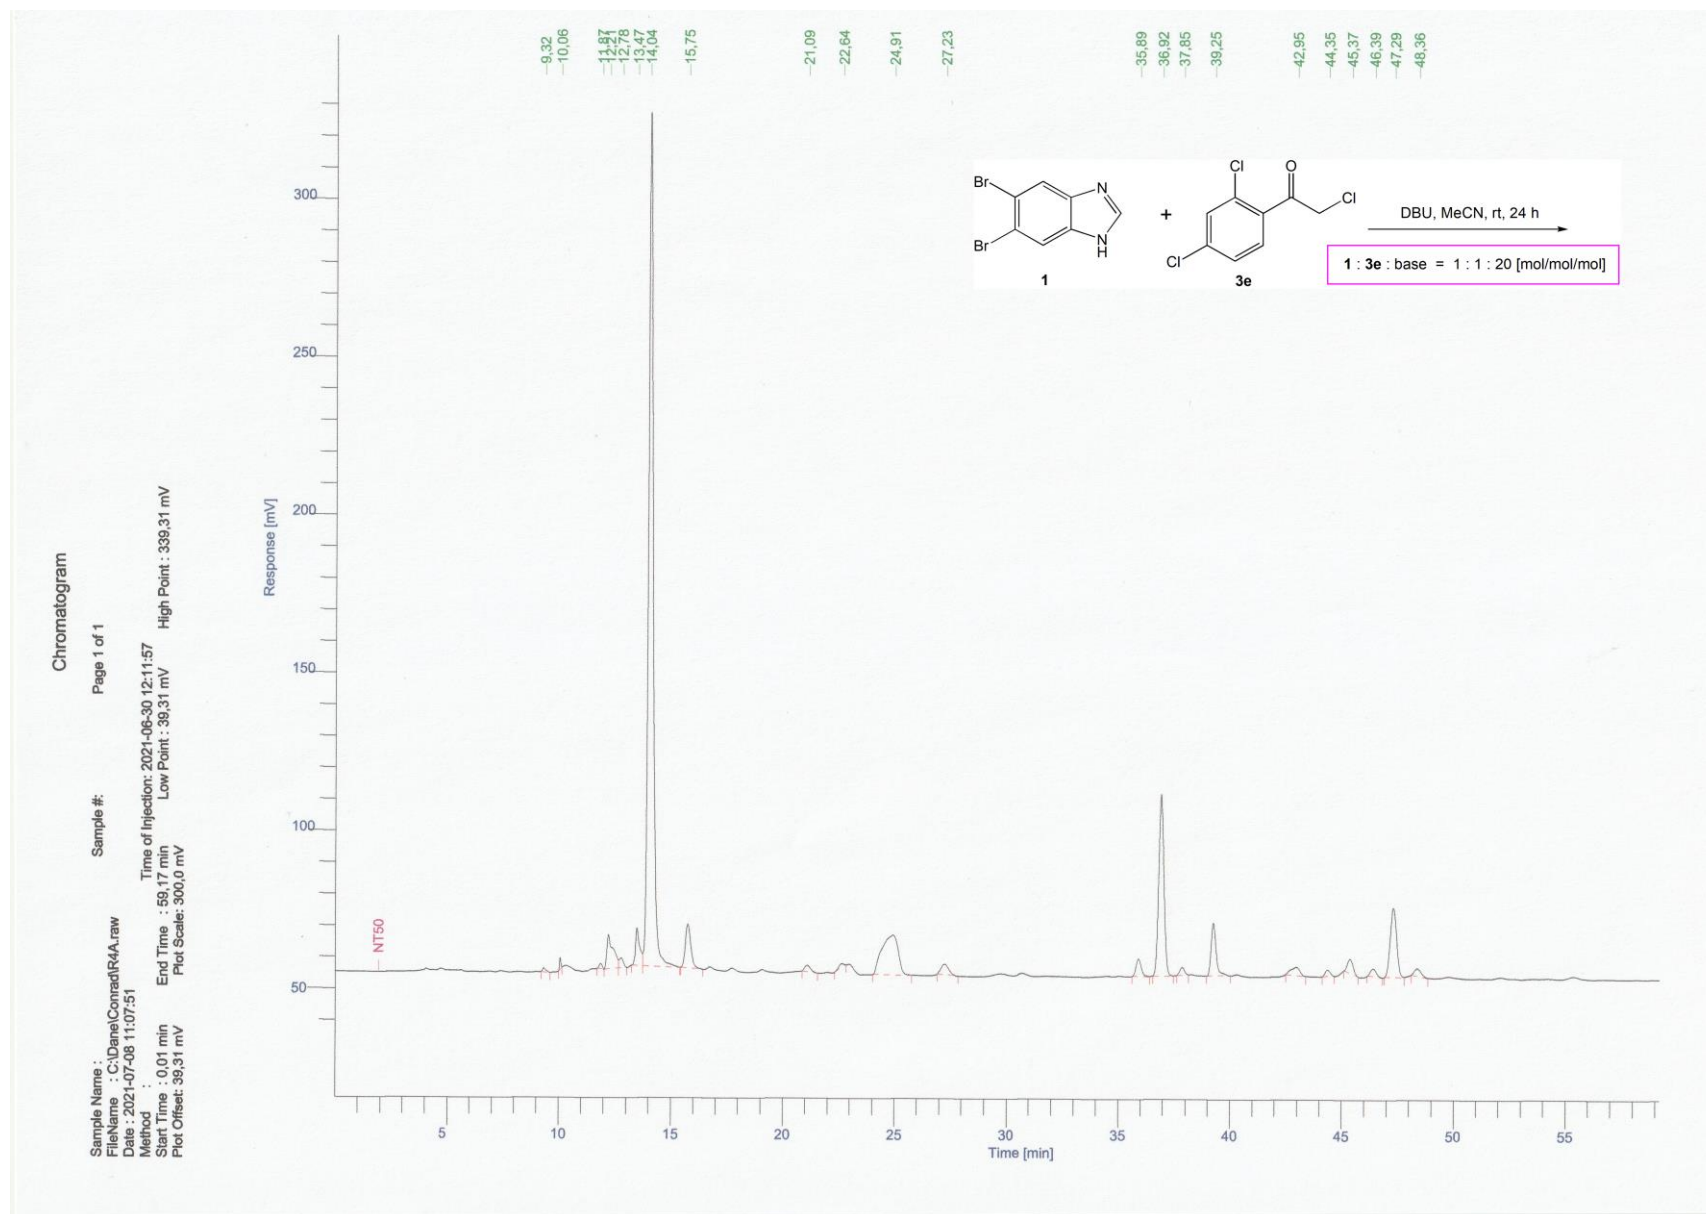

Table 1, Entry 20

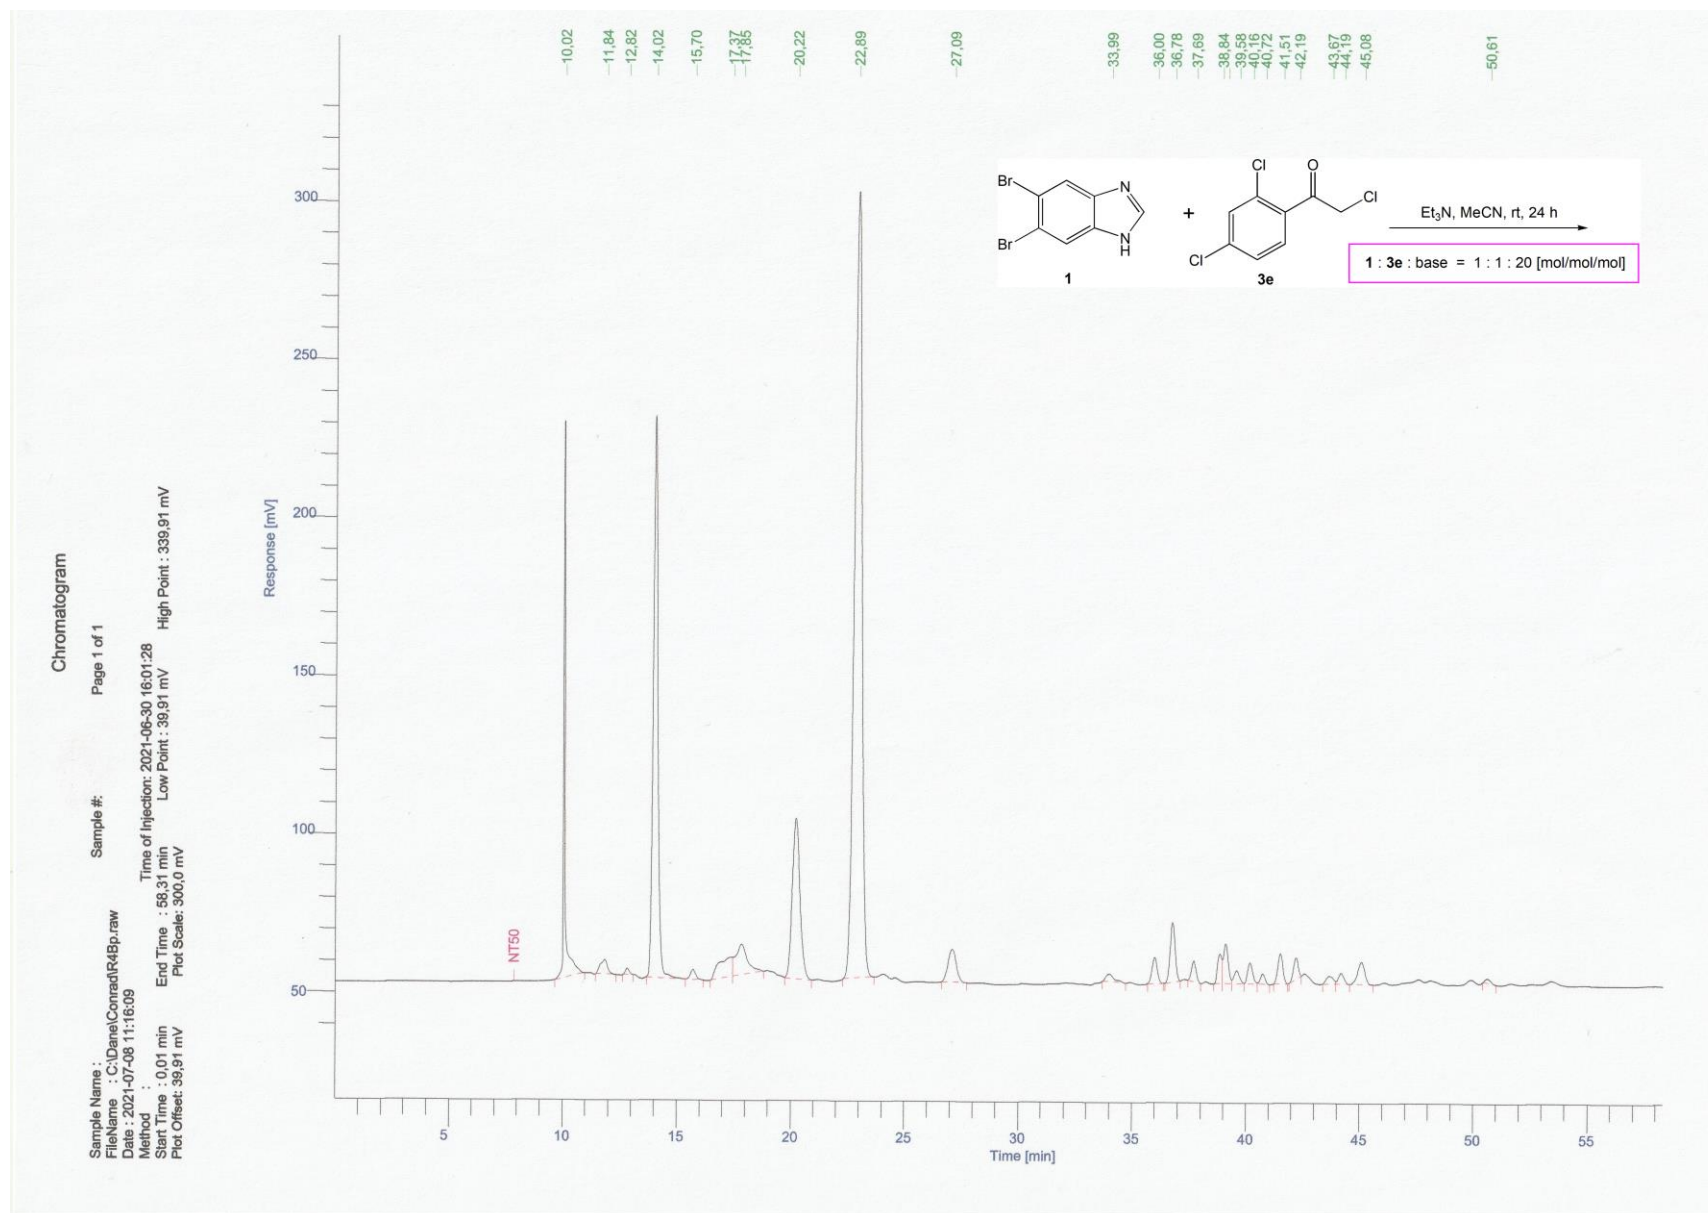

Table 1, Entry 21

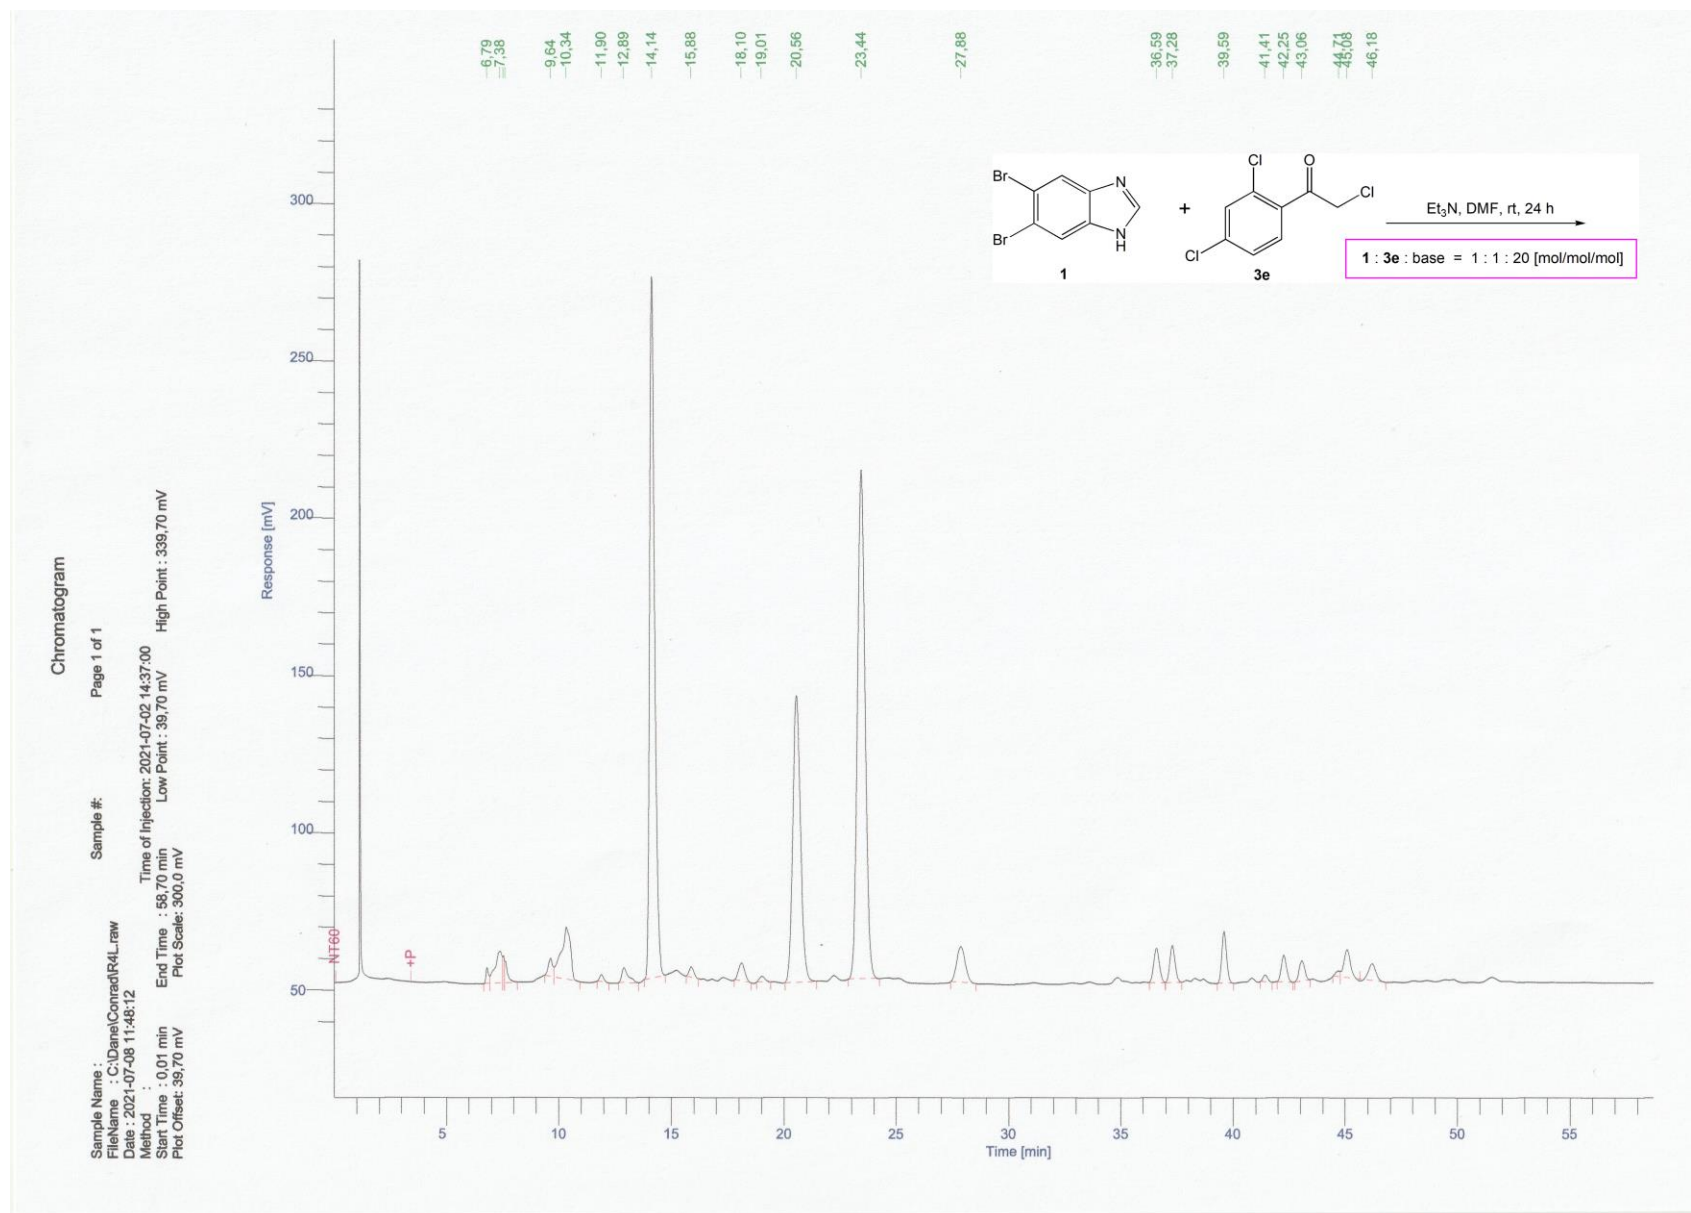



Table 1, Entry 22

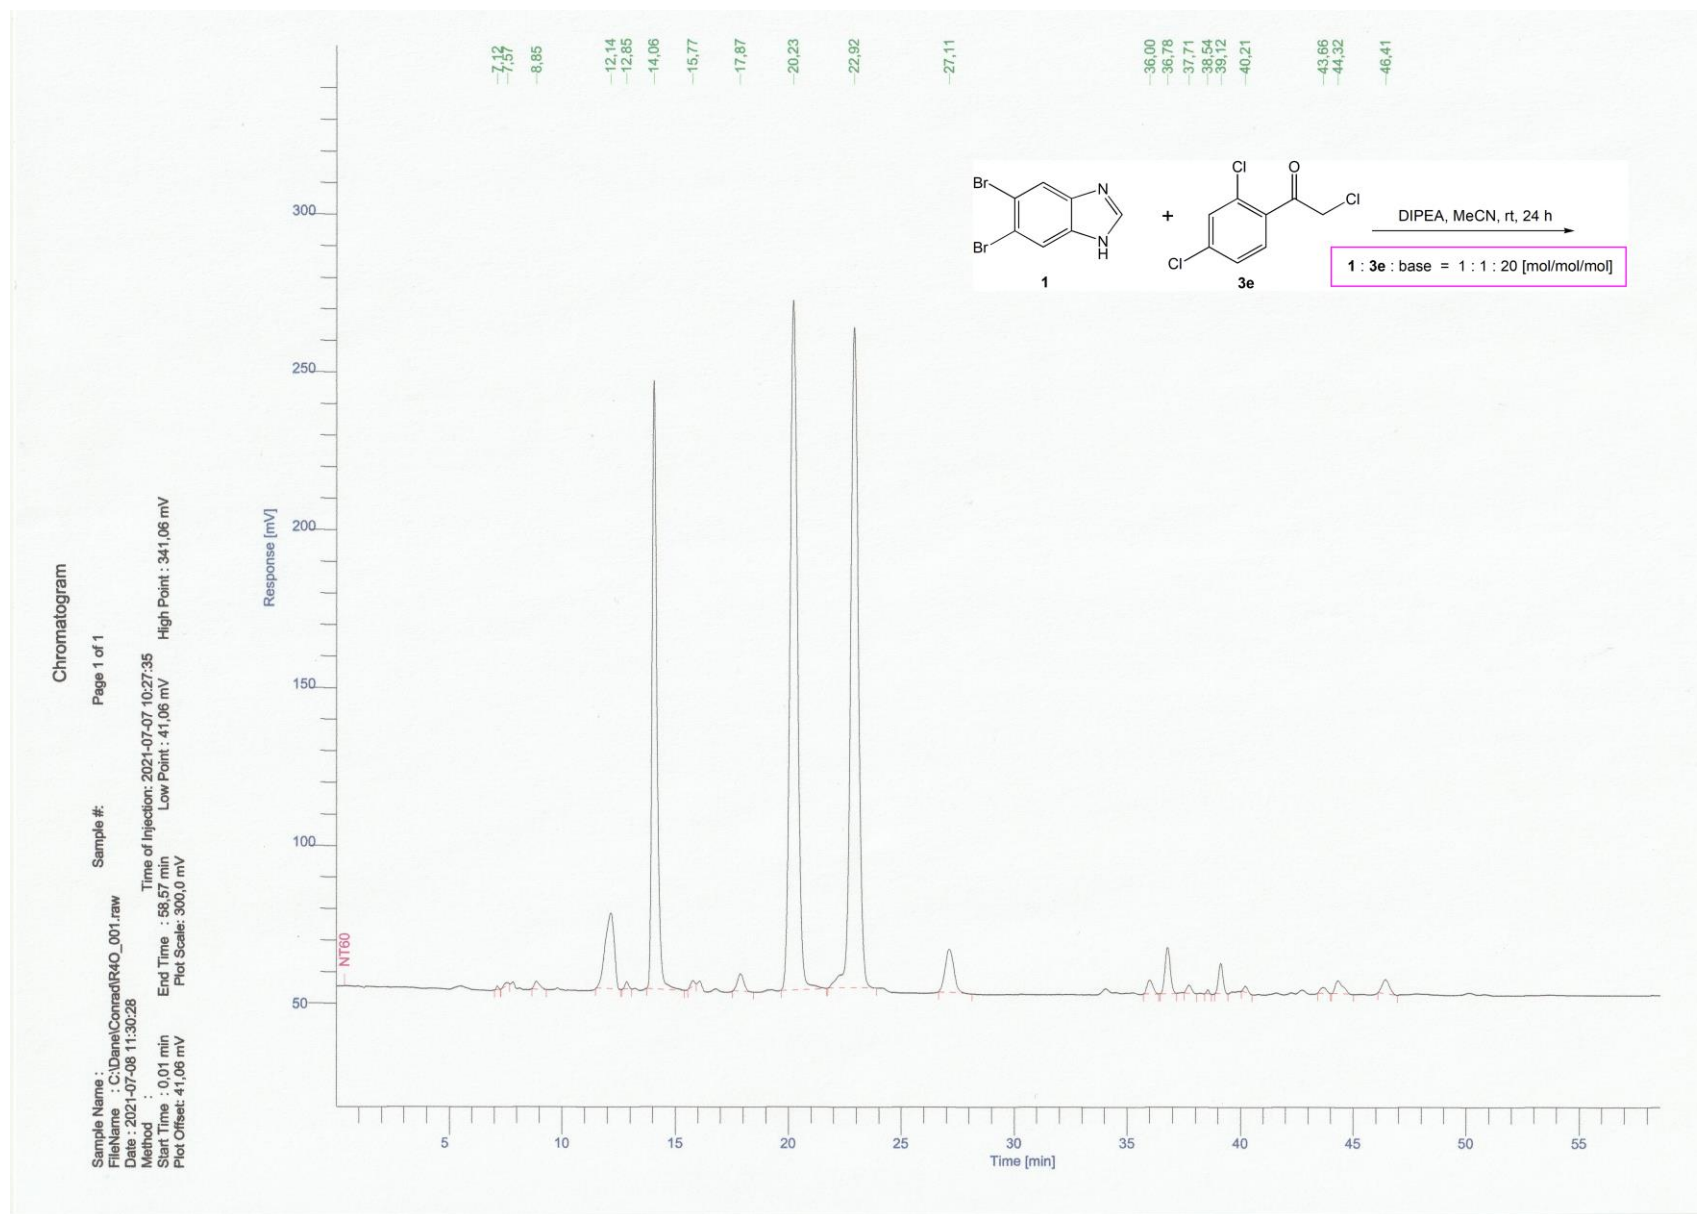

Table 1, Entry 23

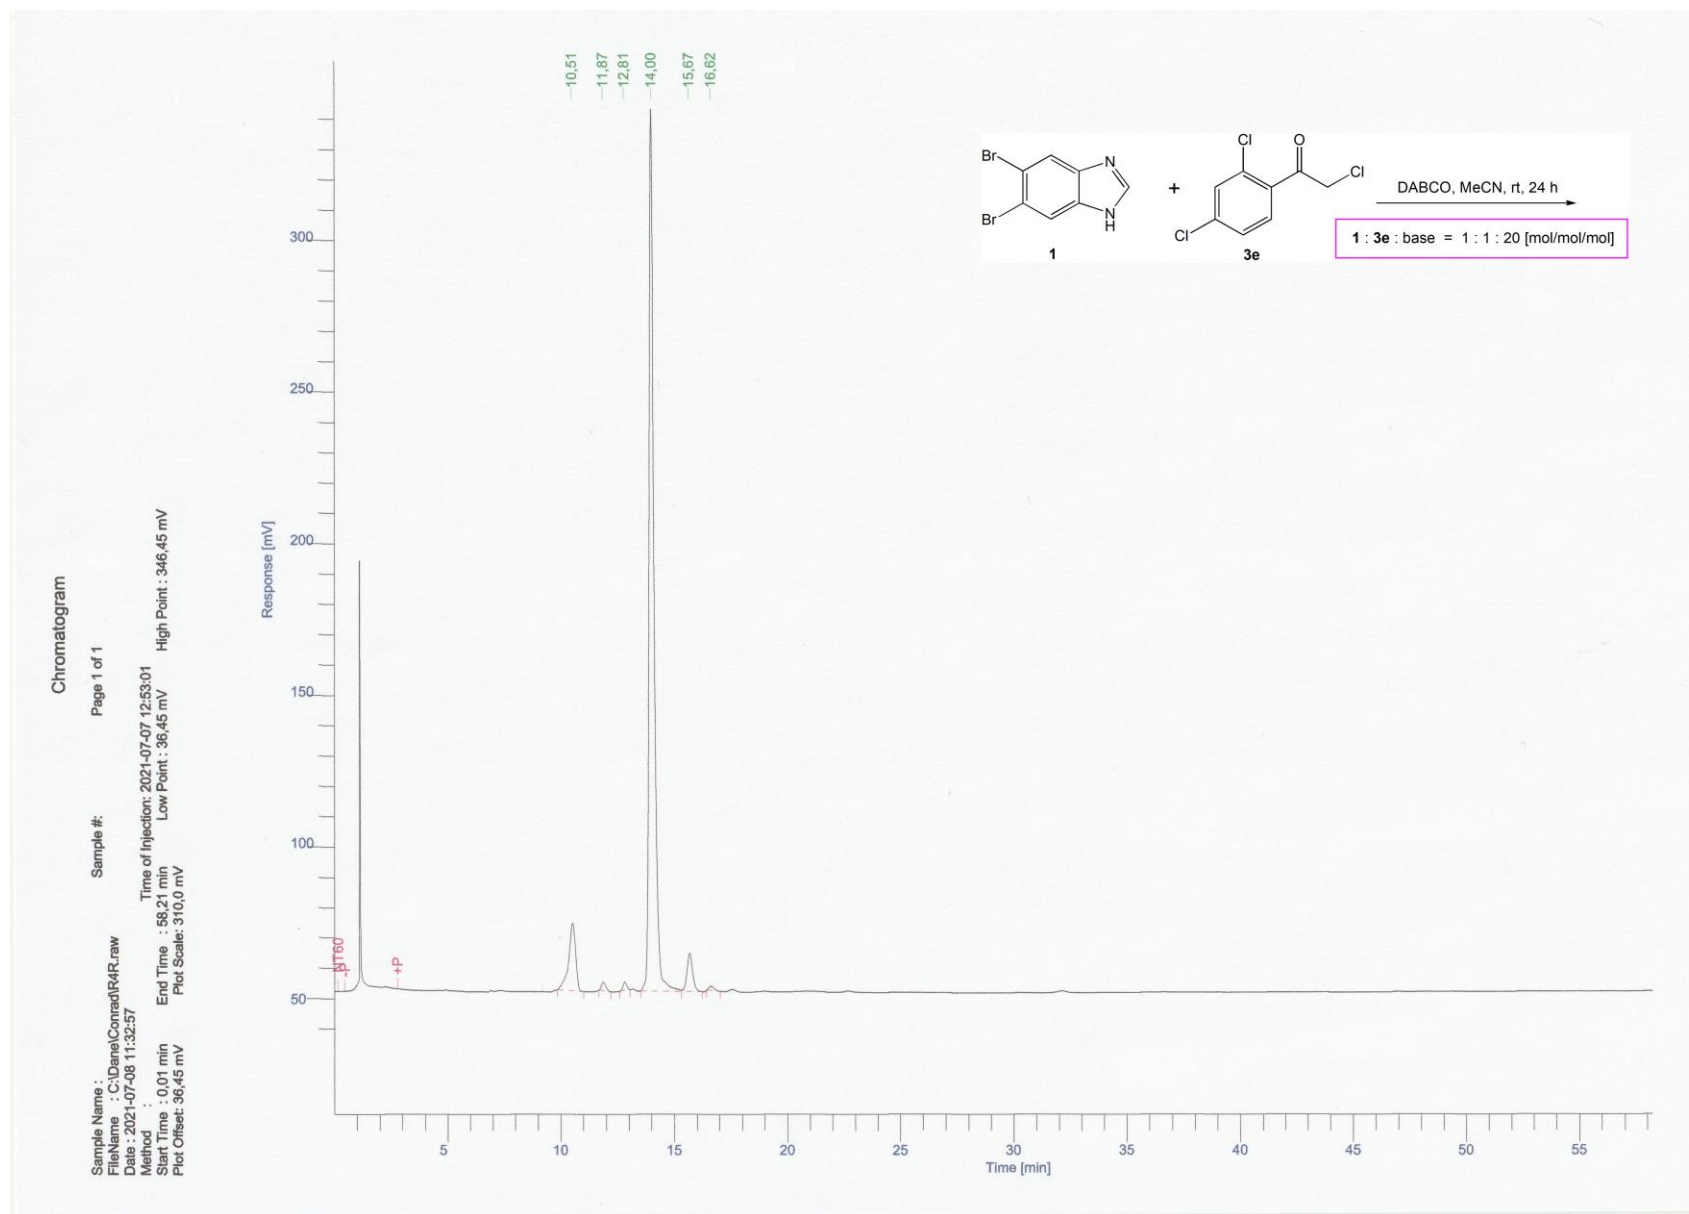

Table 1, Entry 24

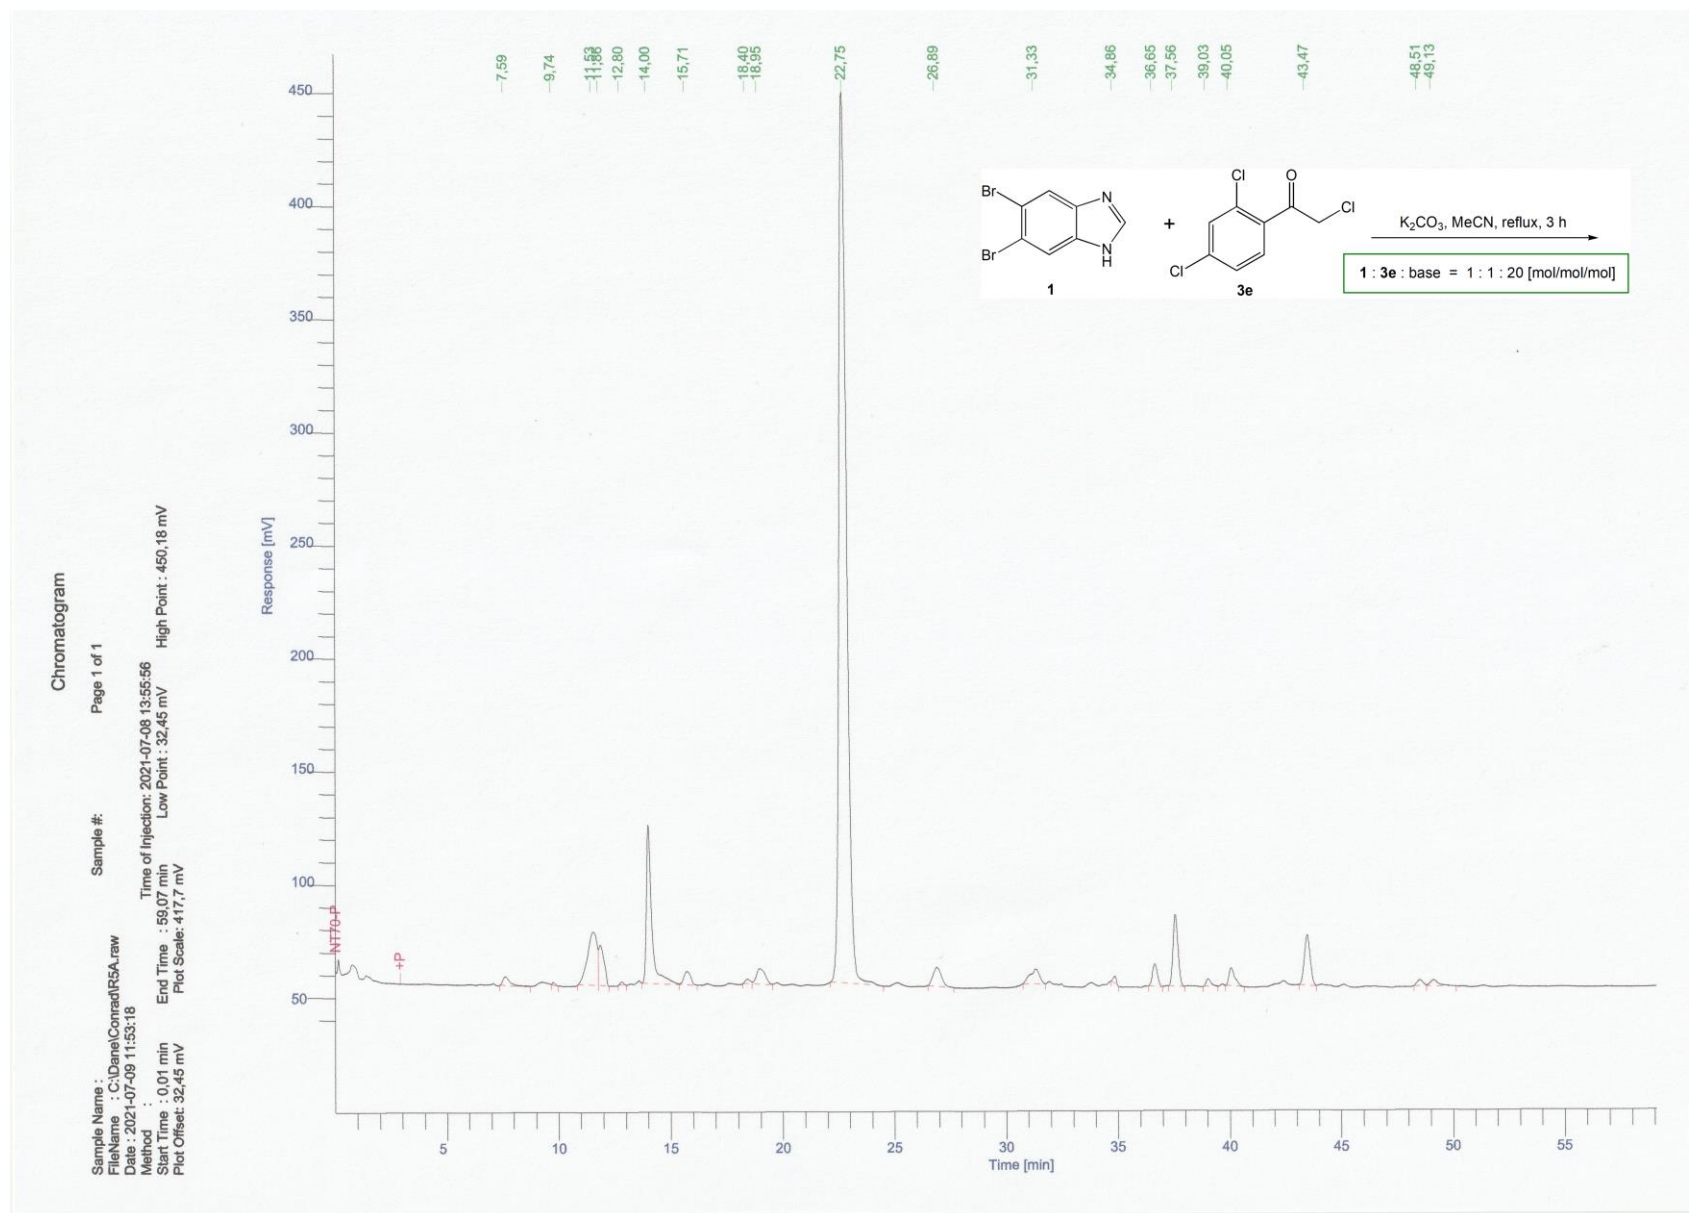

Table 1, Entry 25

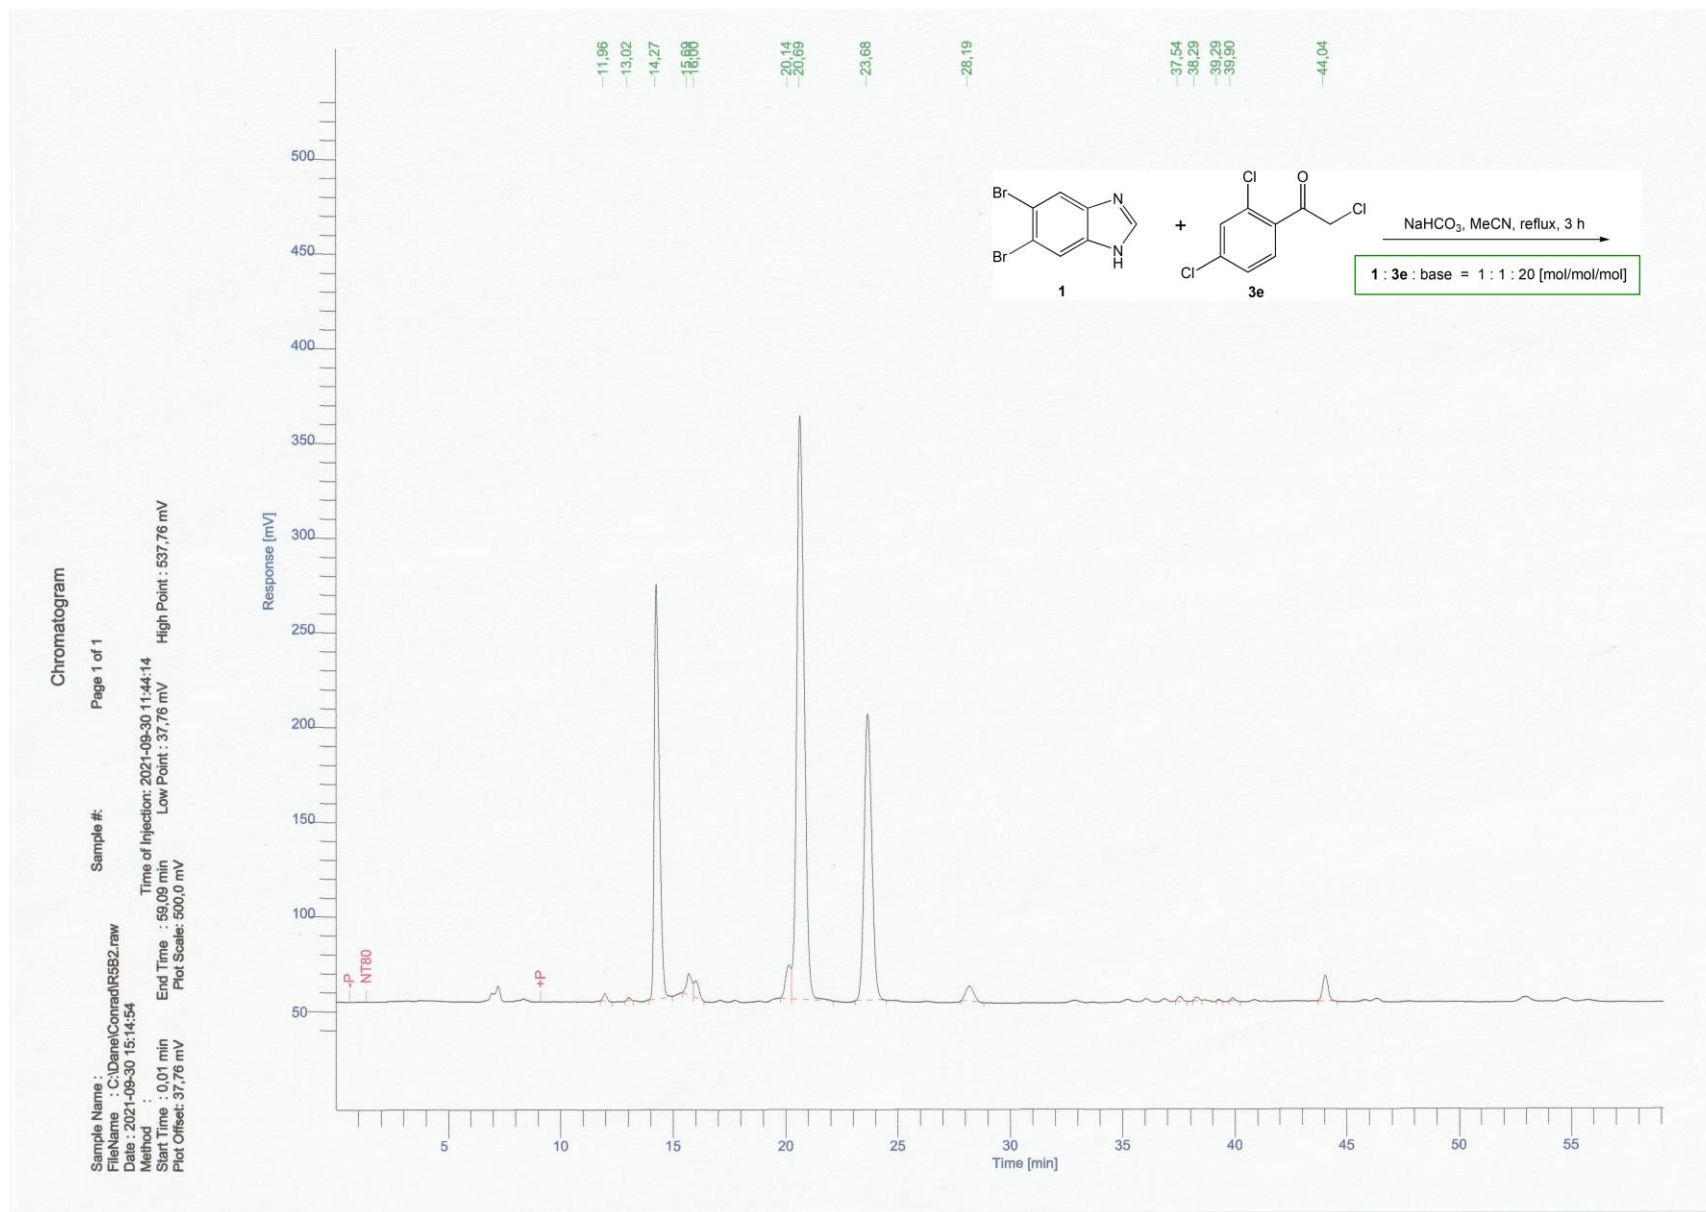

Table 1, Entry 26

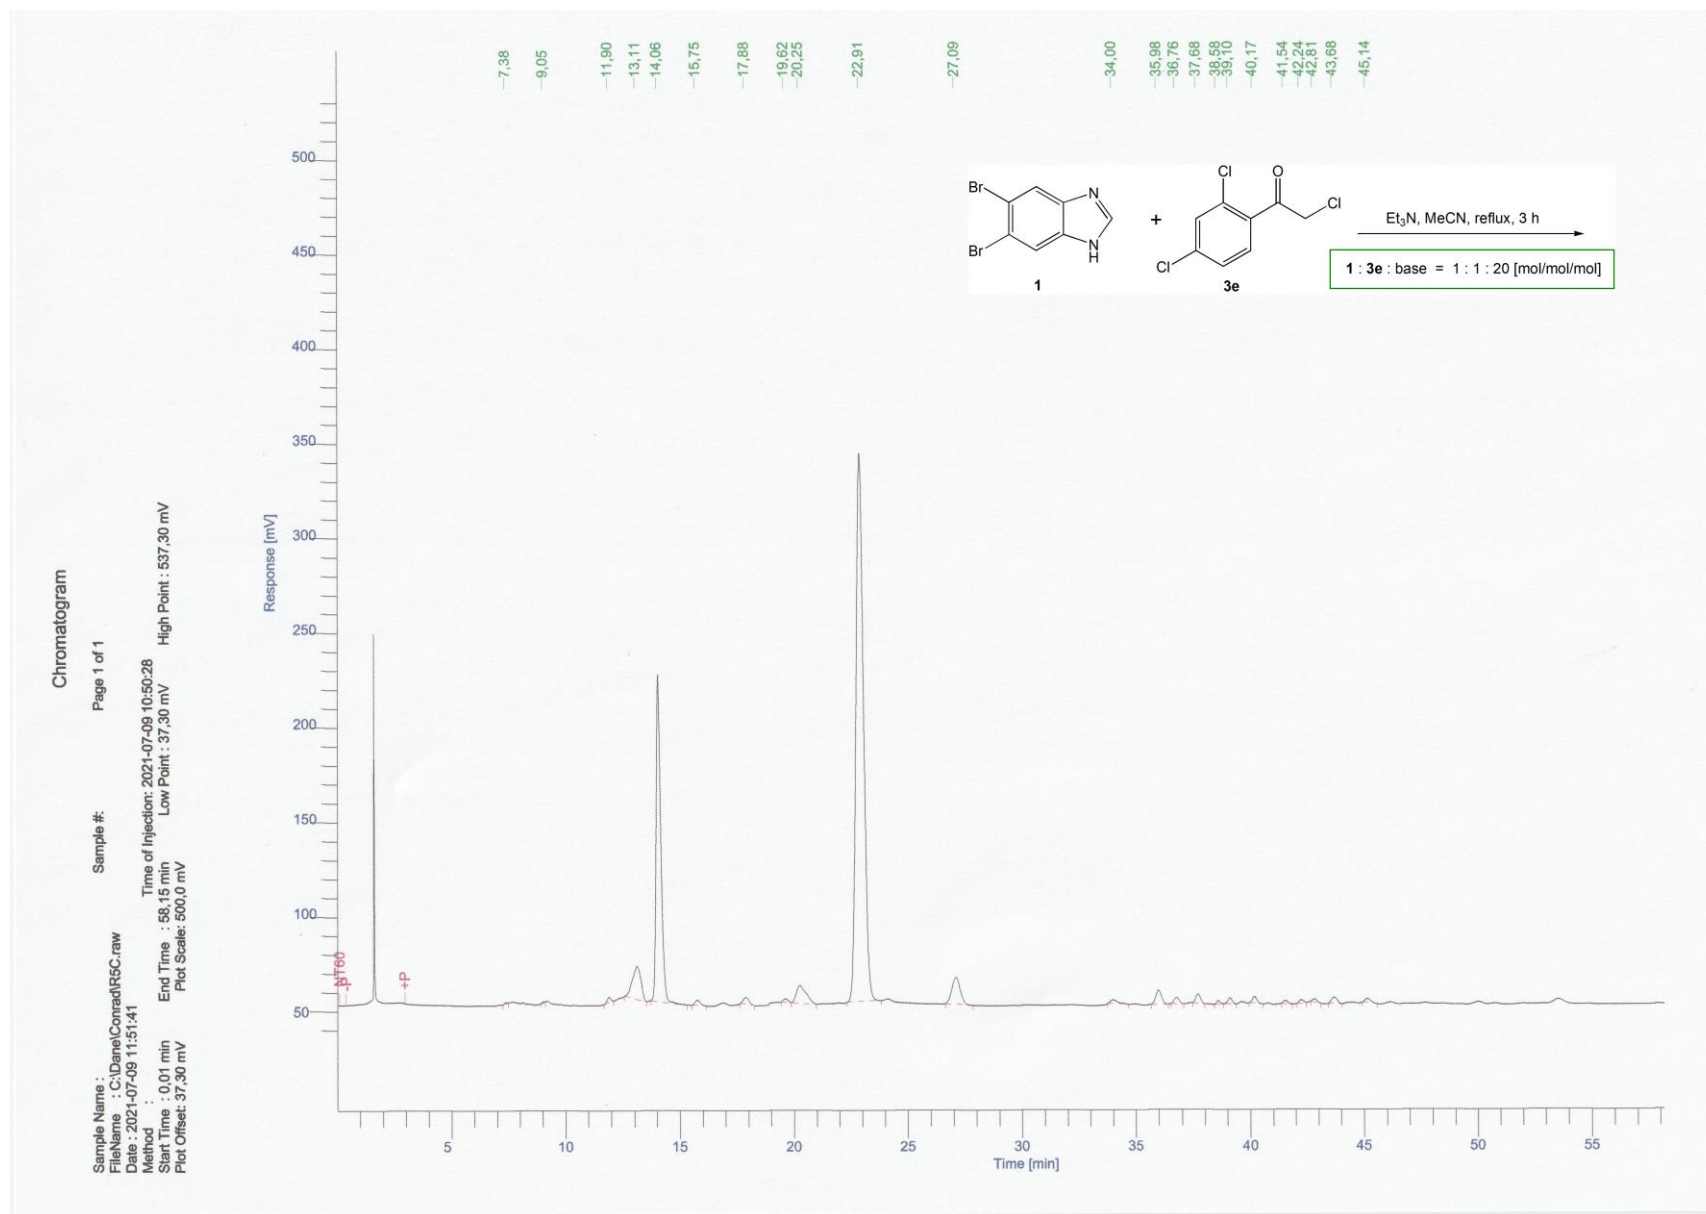



Table 1, Entry 27

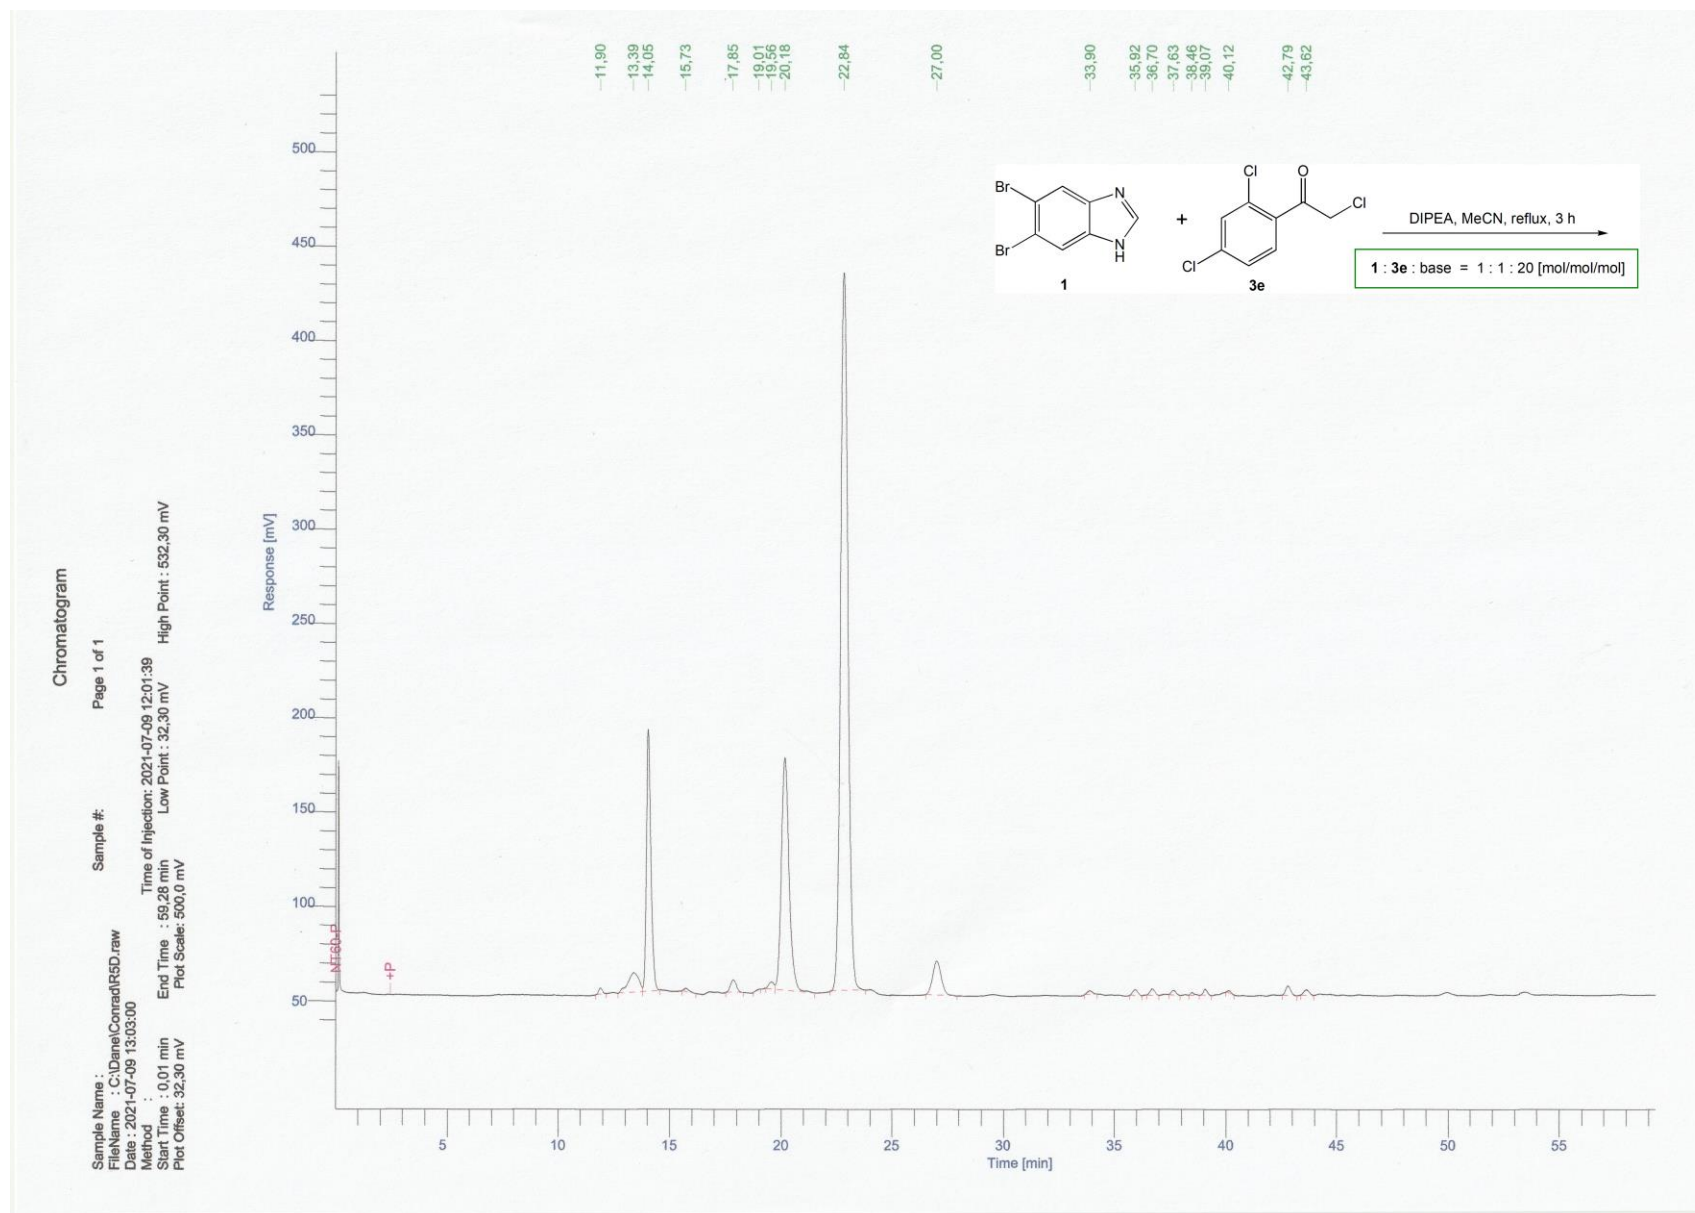

Table 1, Entry 28

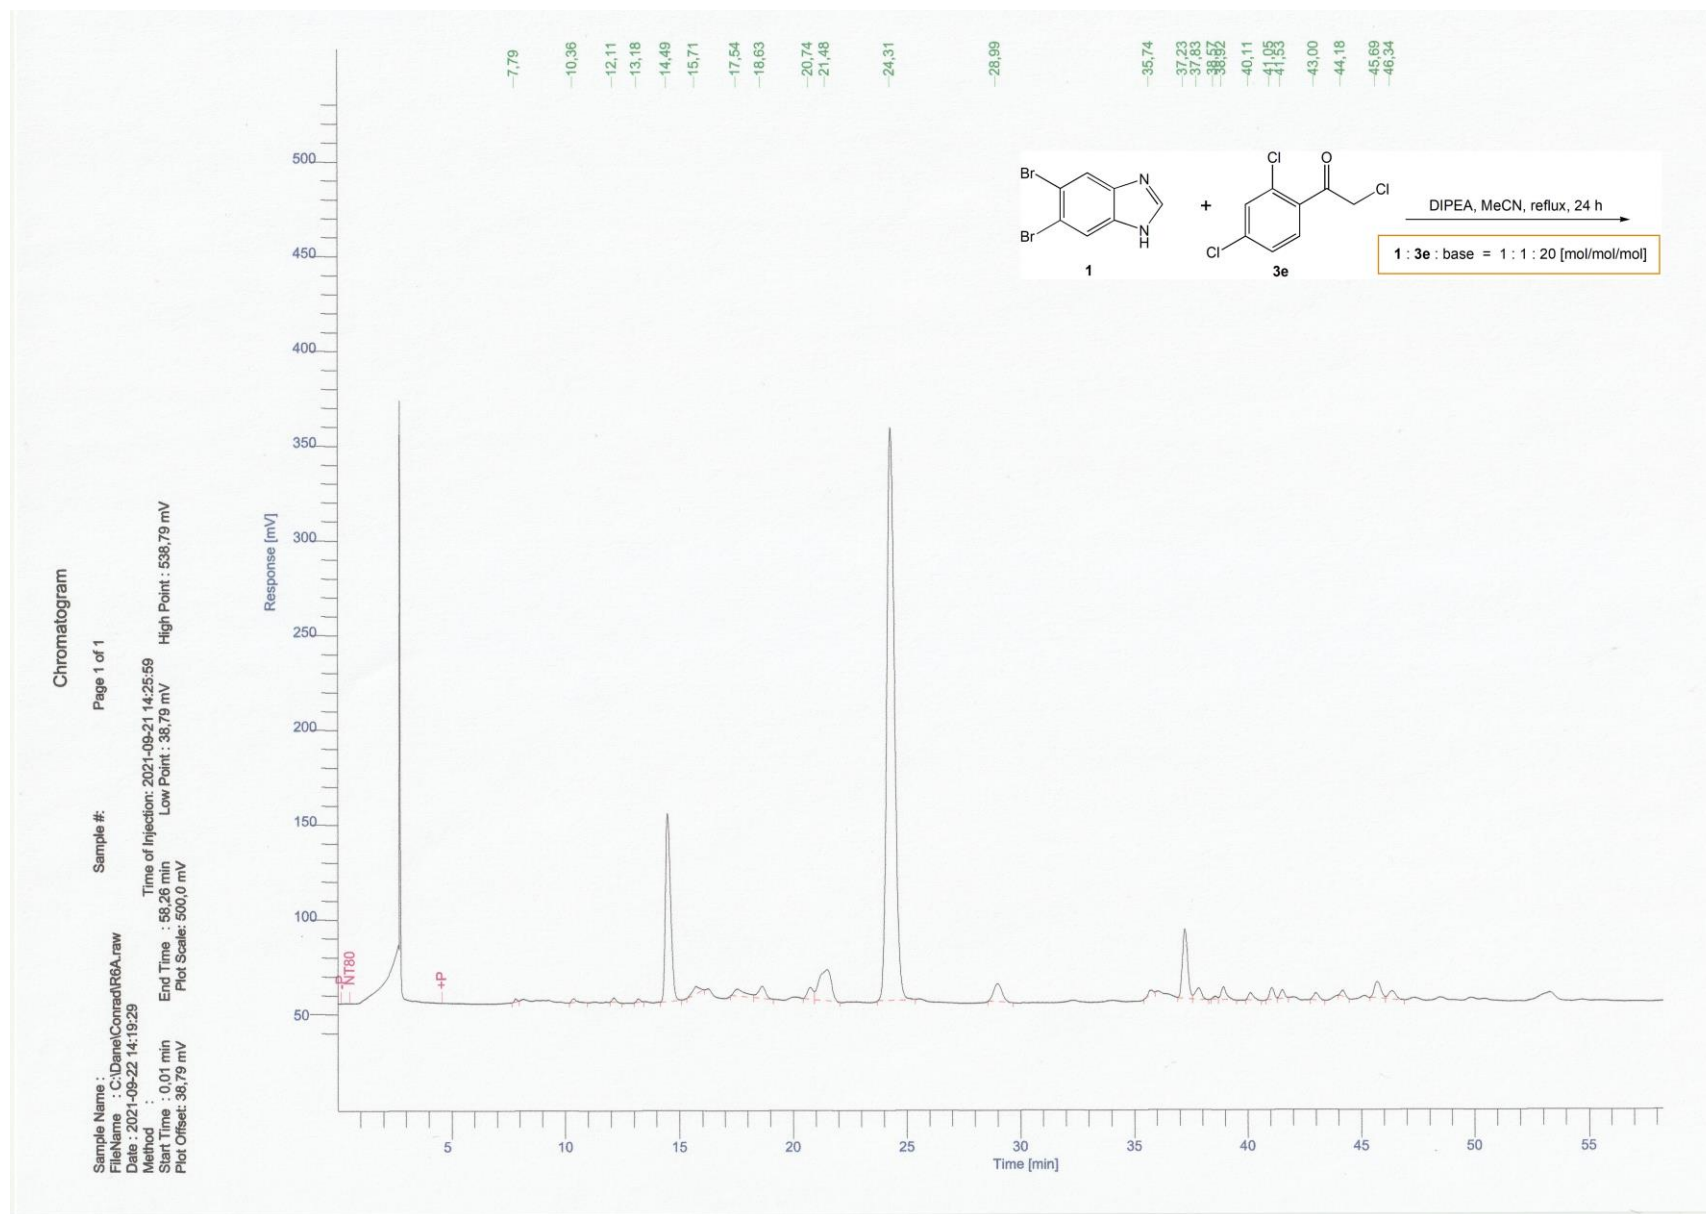

Table 1, Entry 29

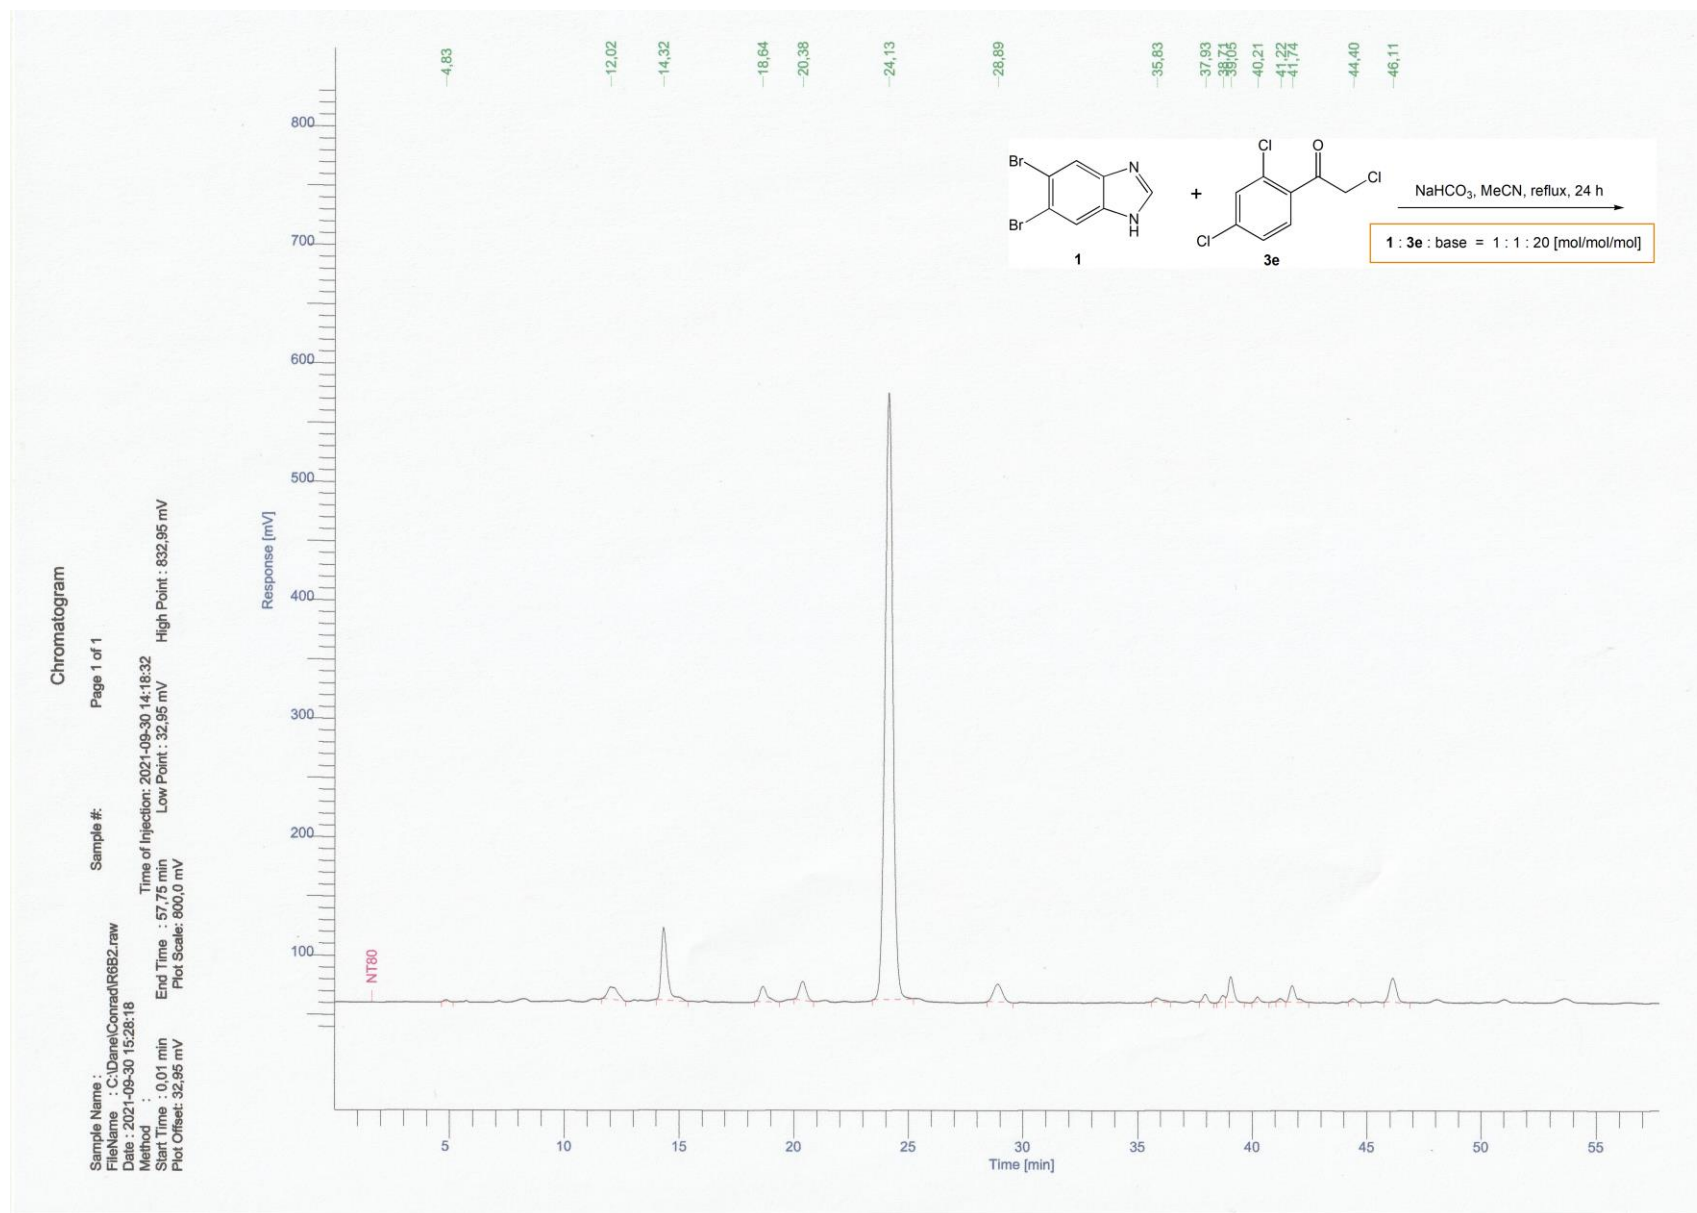

Table 1, Entry 30

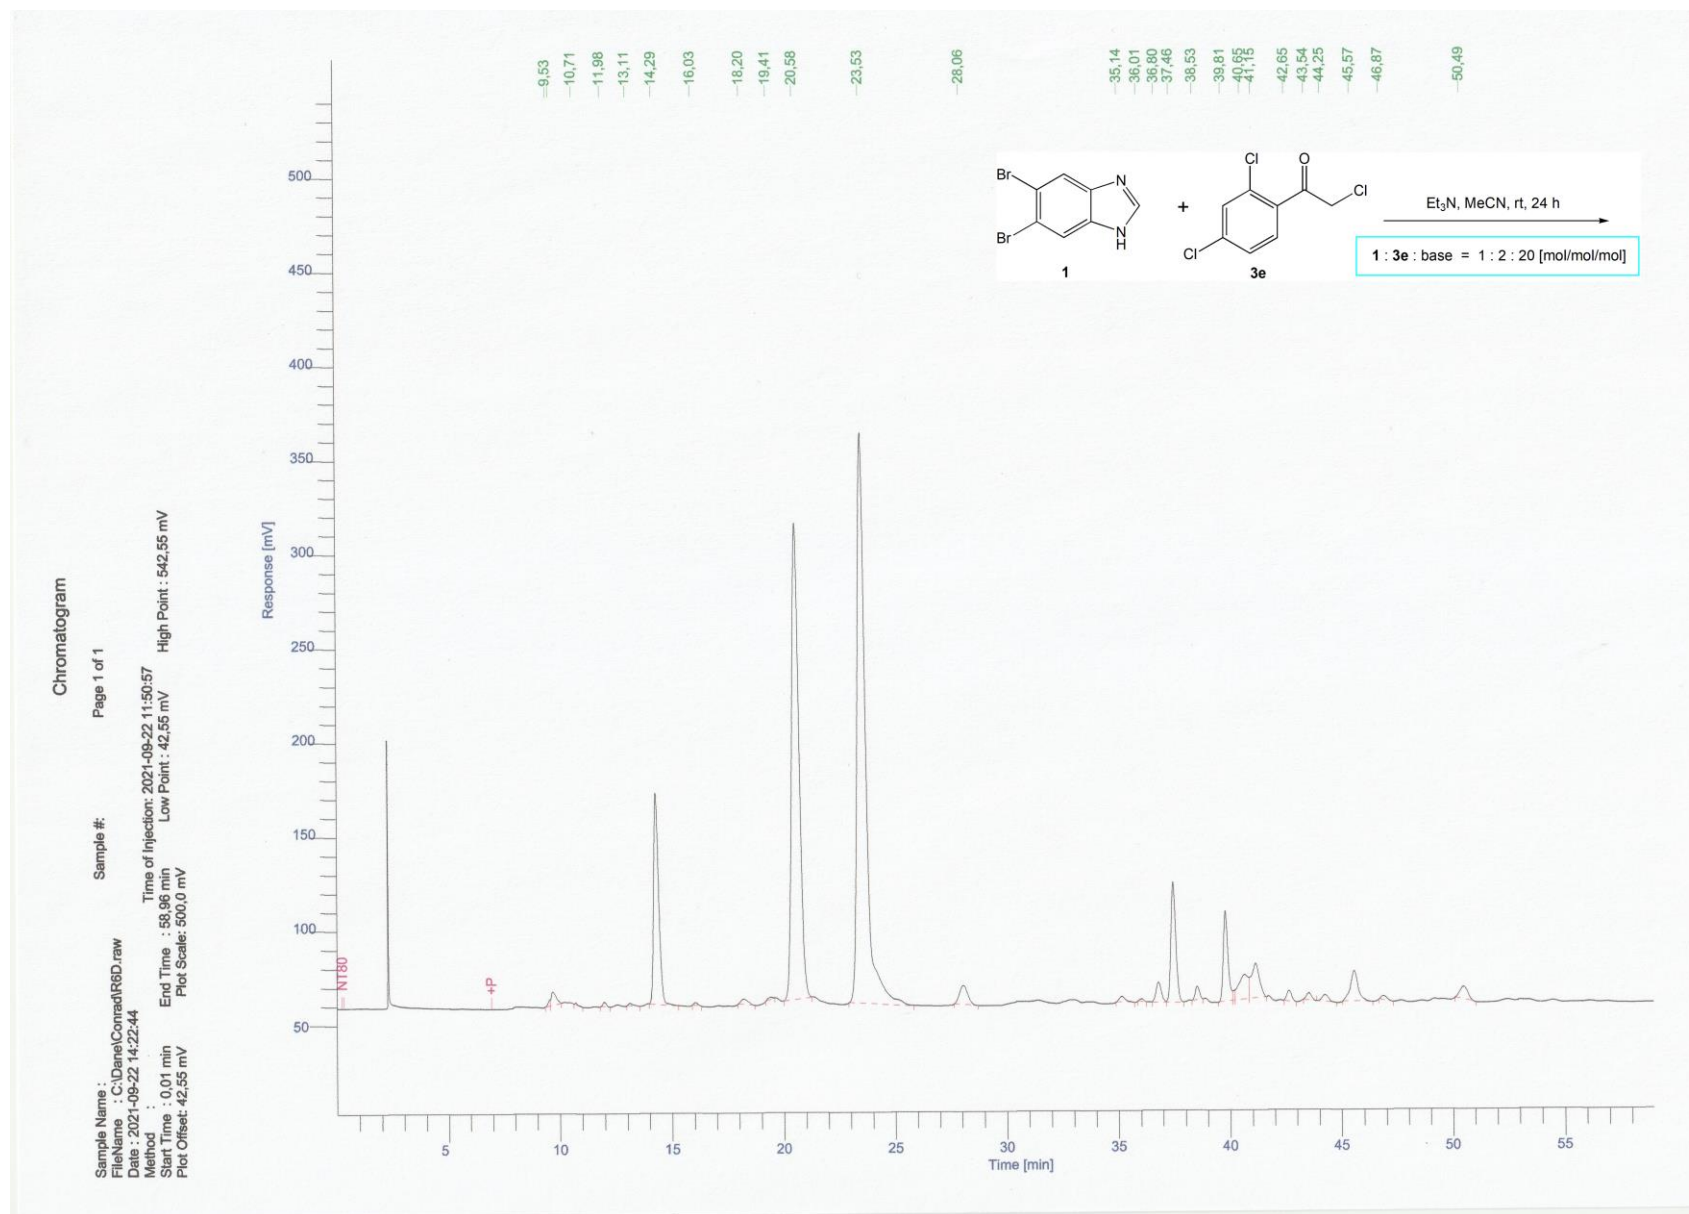

Table 1, Entry 31

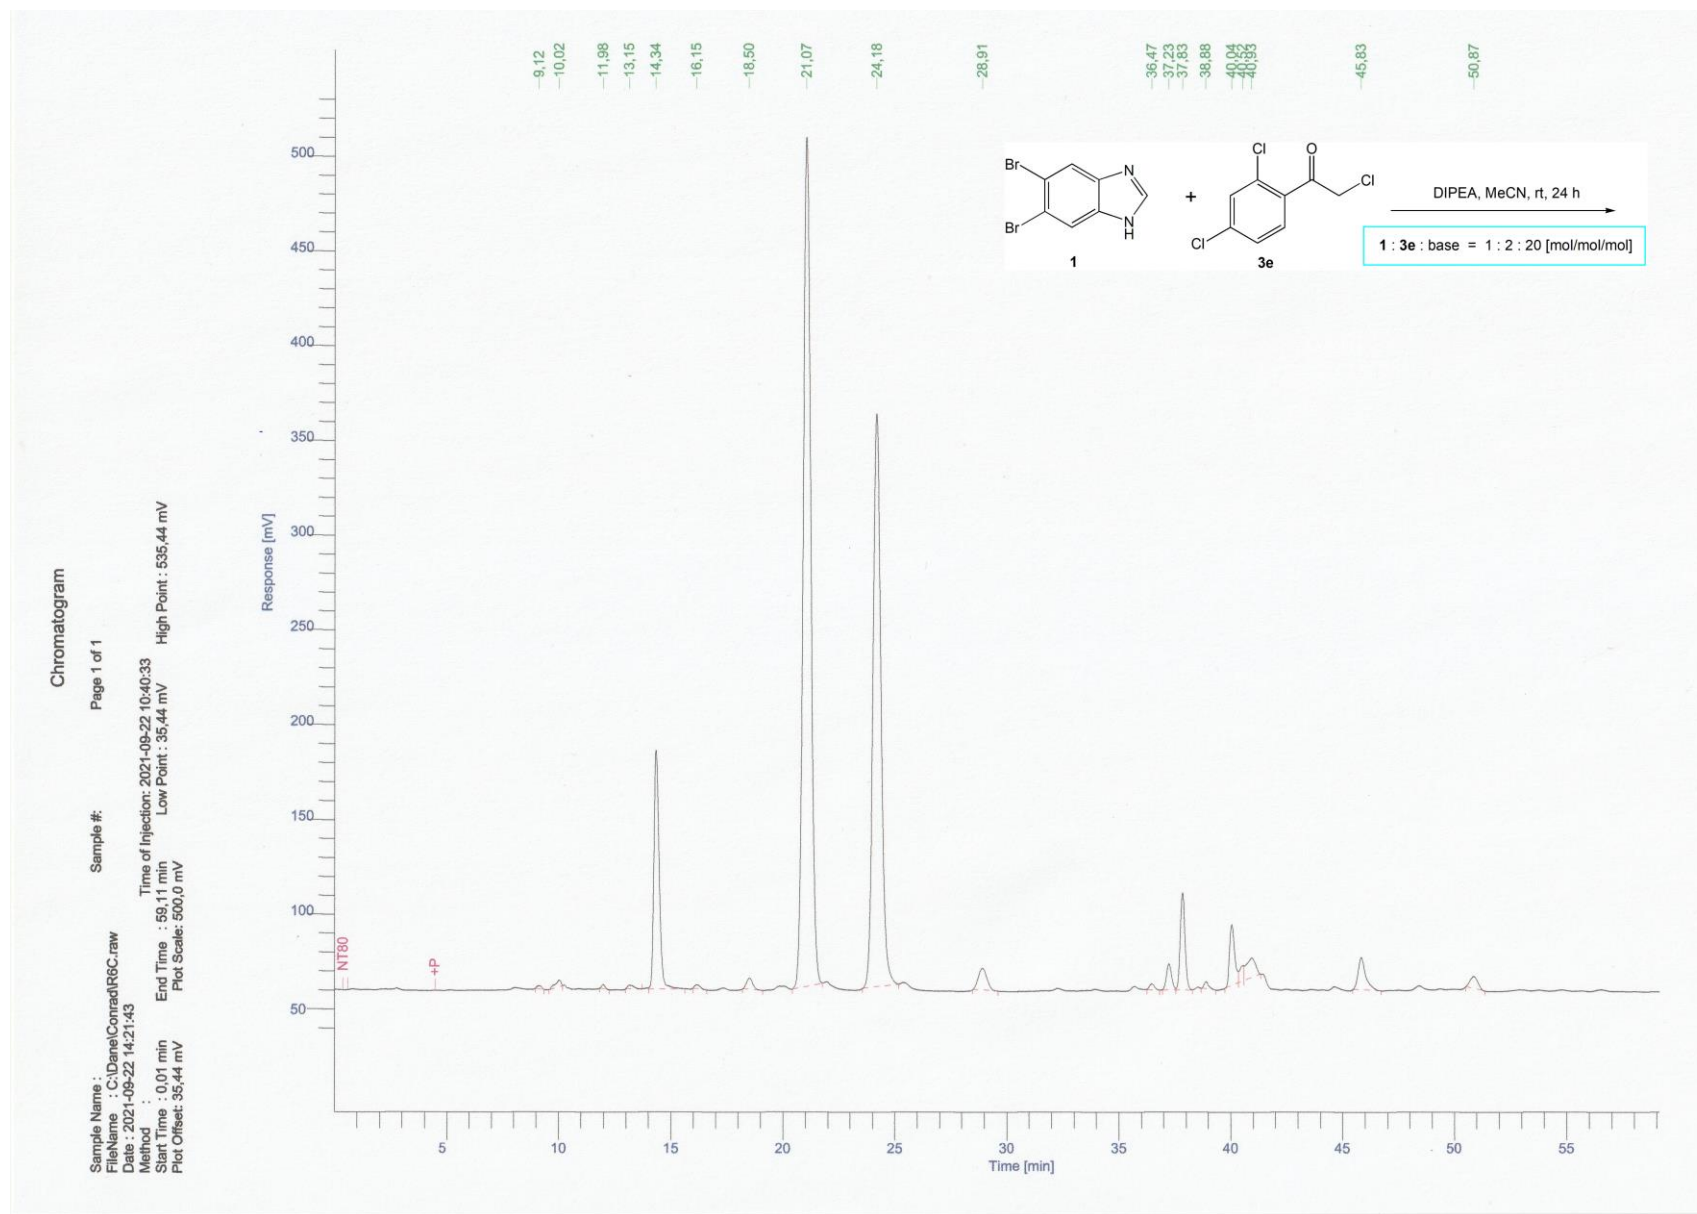



Table 1, Entry 32

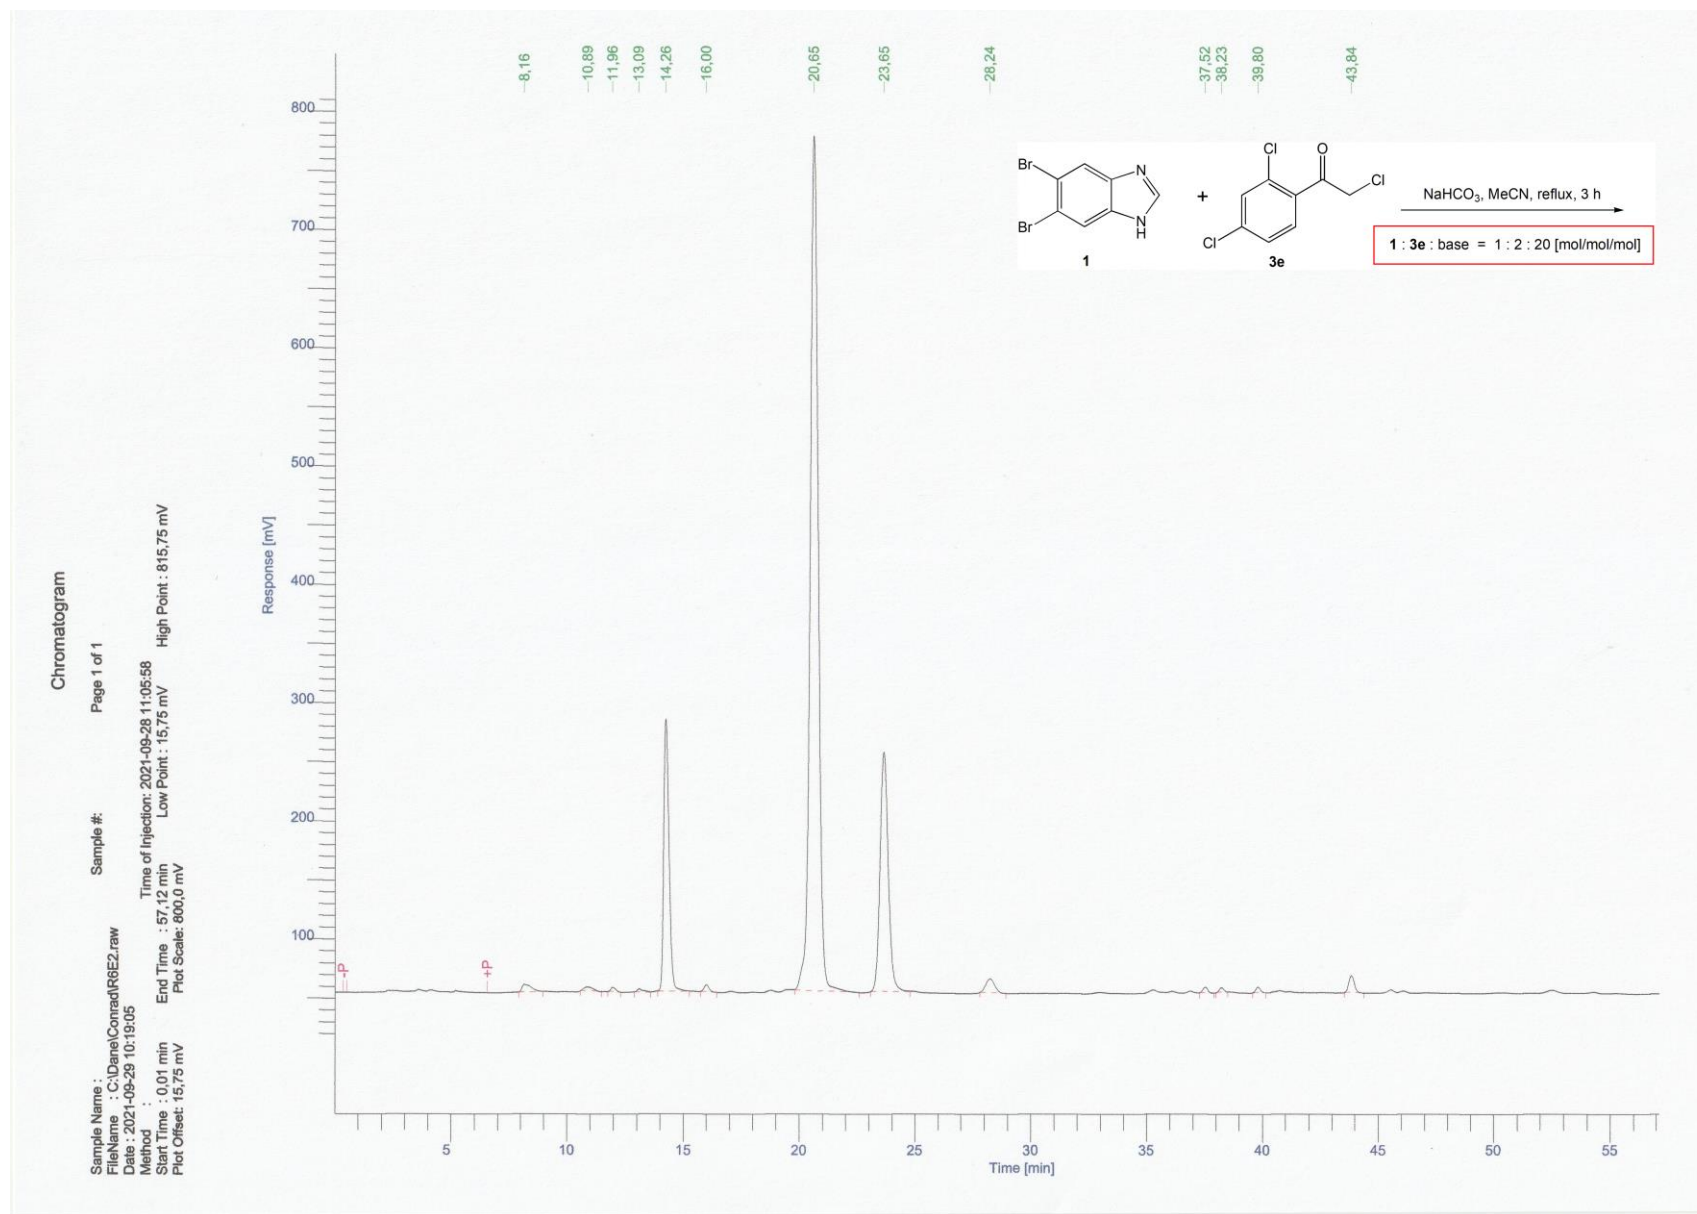

Table 1, Entry 33

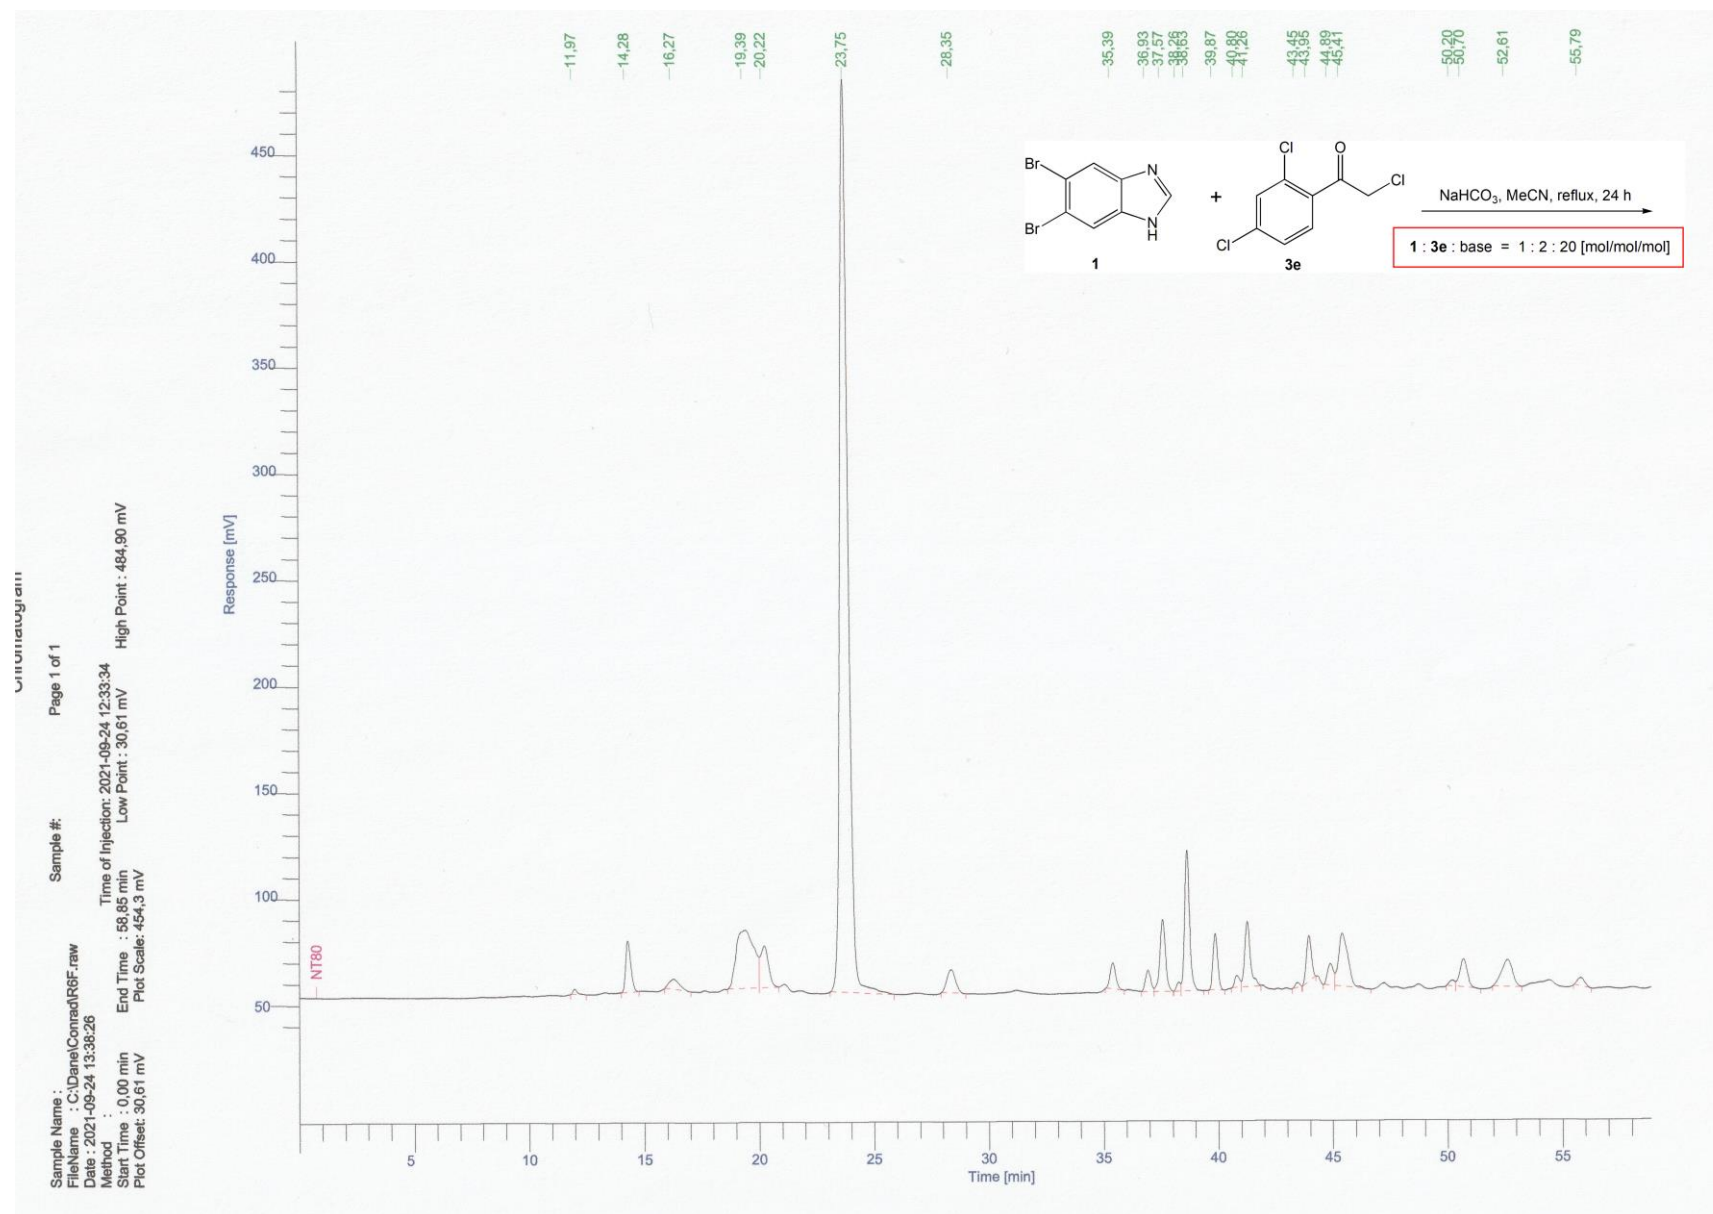

Table 1, Entry 34

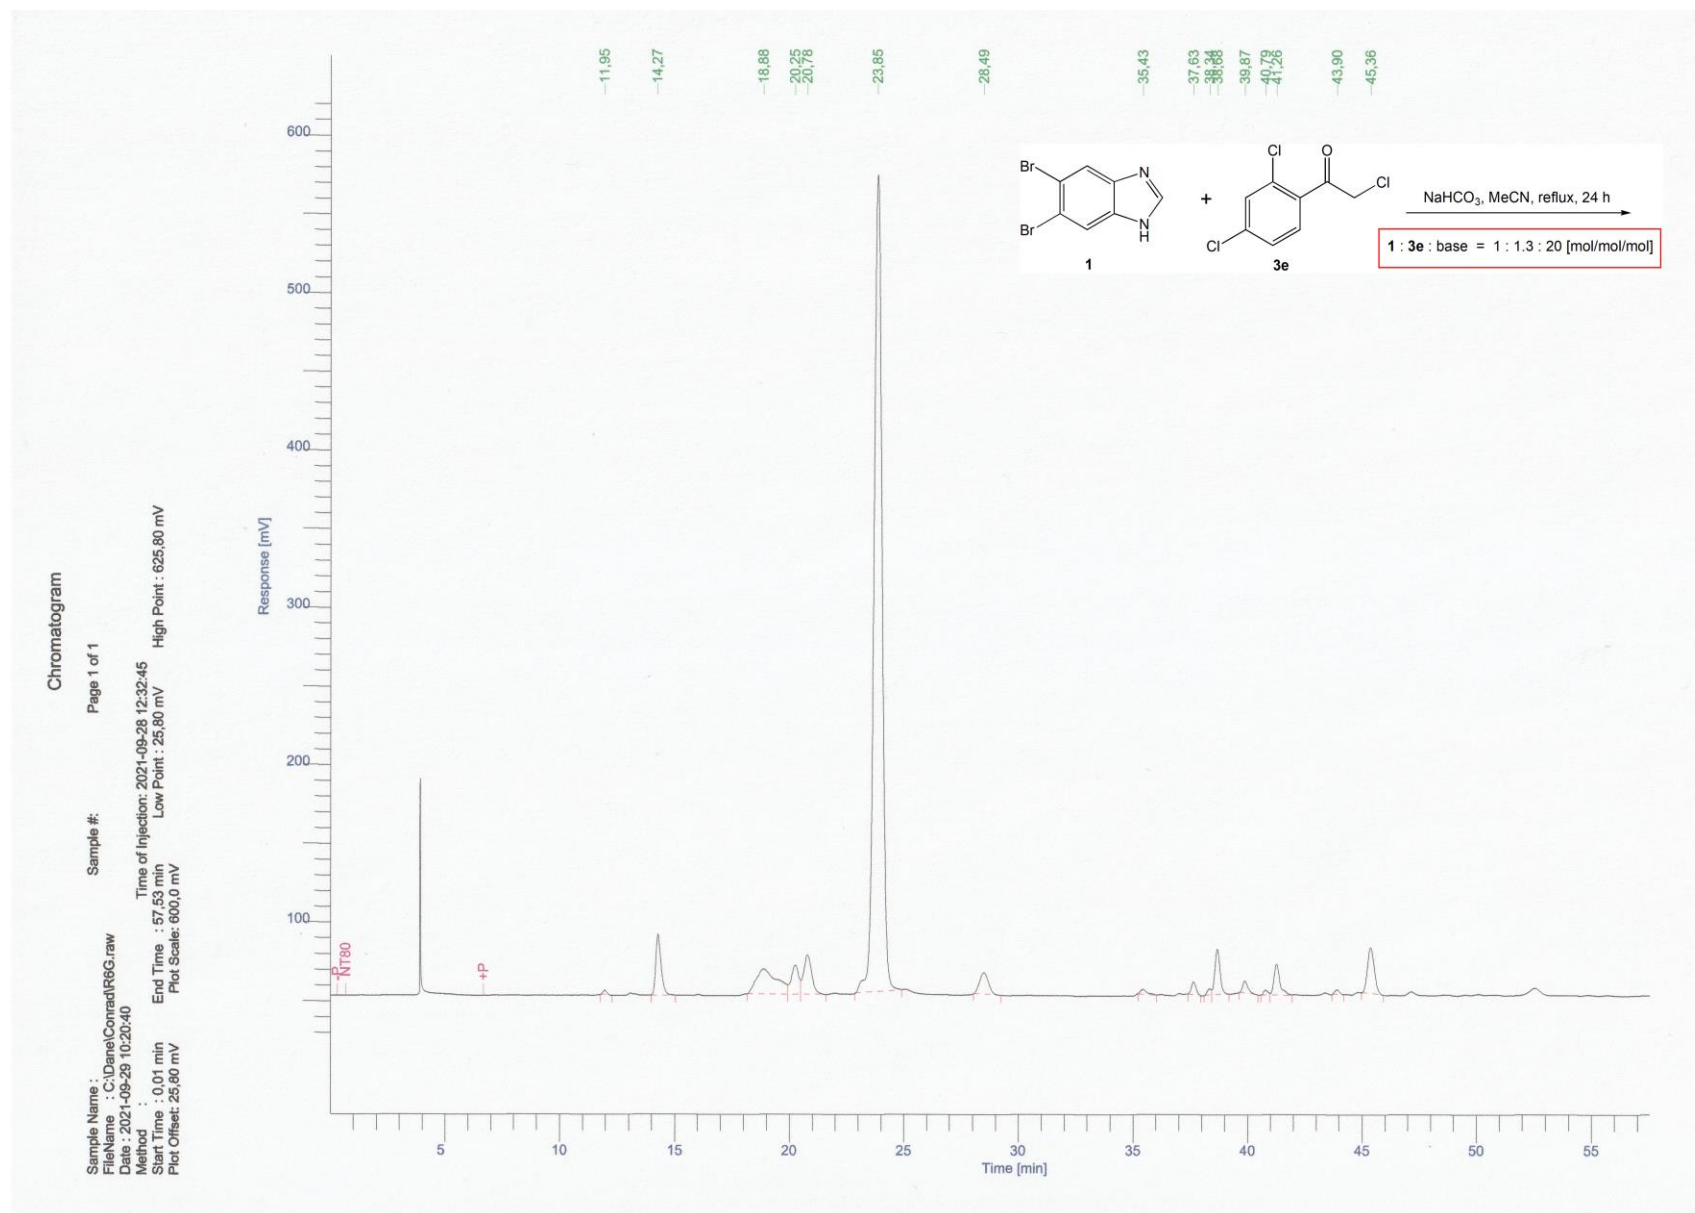

Table 1, Entry 35

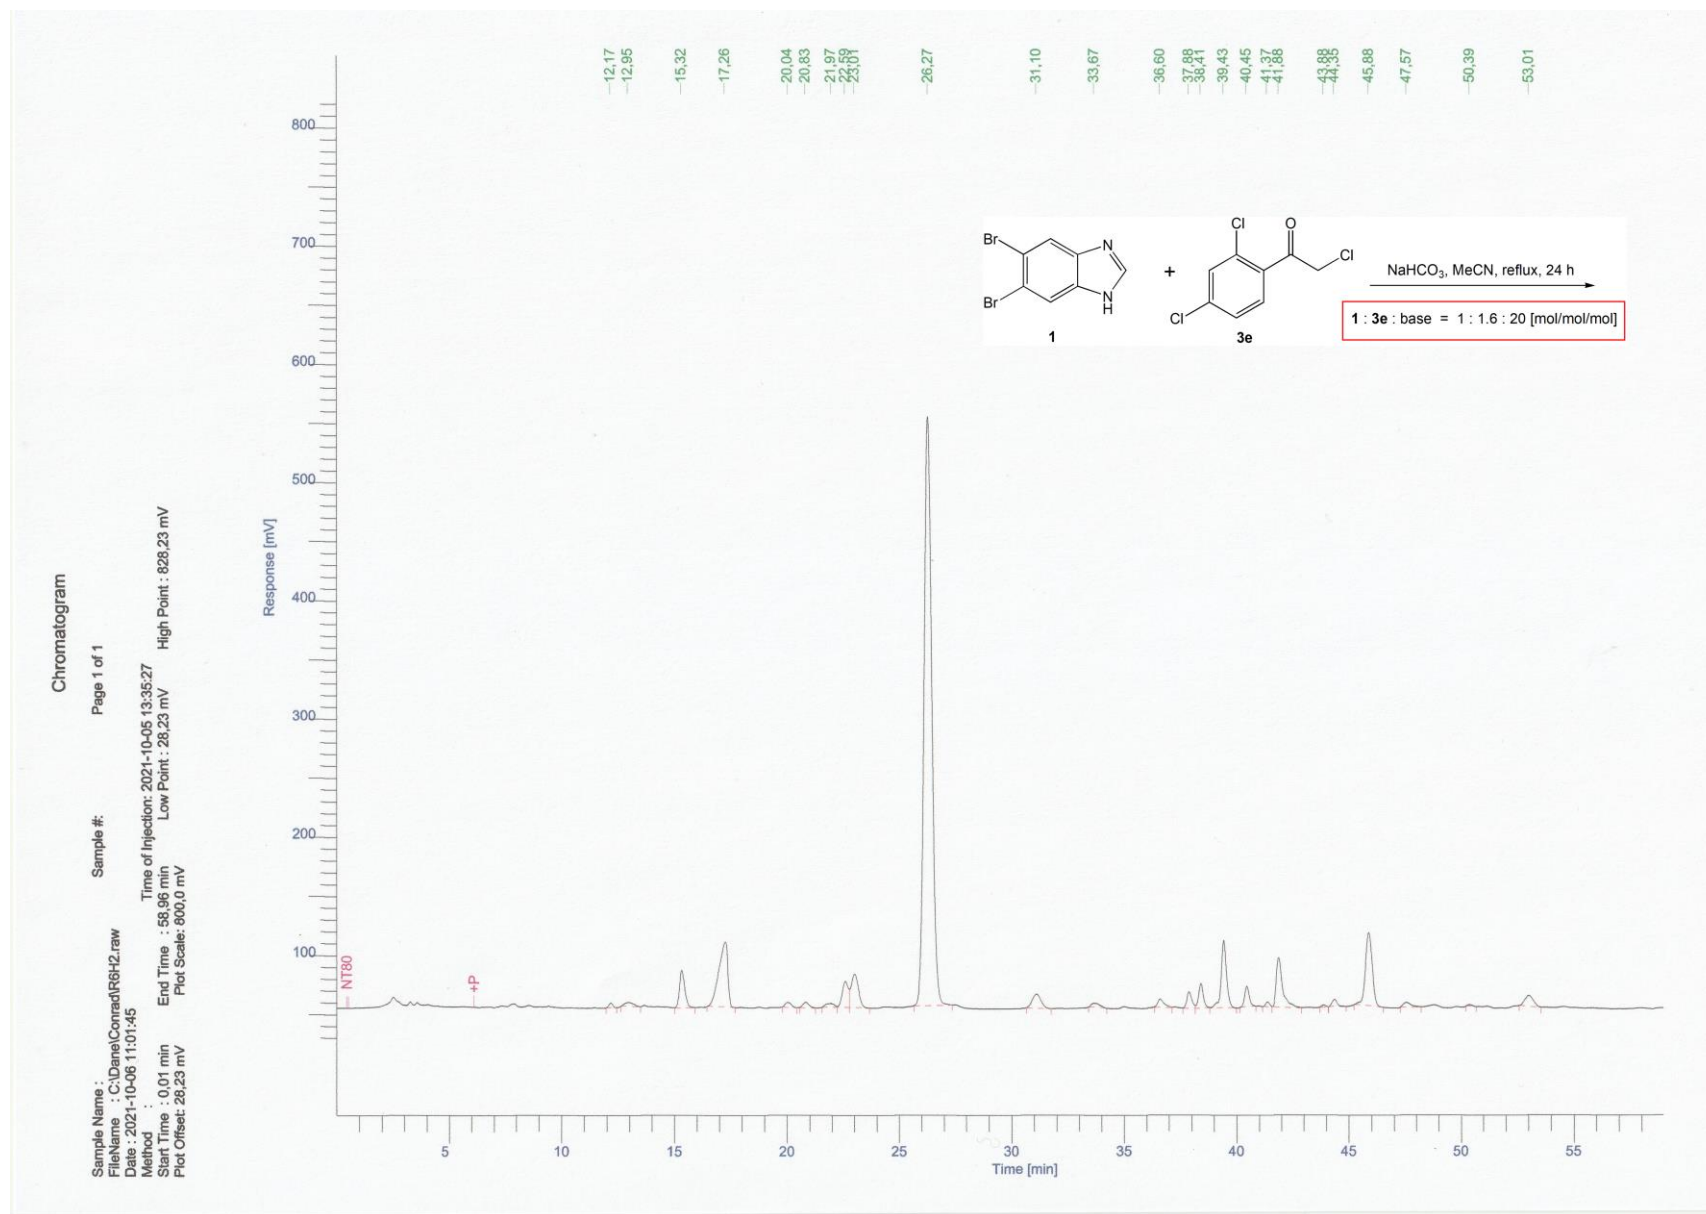

Supplement: s1 [file s1]
