# Supplementary material for: N-Phenacyldibromobenzimidazoles—Synthesis Optimization and Evaluation of Their Cytotoxic Activity
Source: MDPI journal article supplement (doi:10.3390/molecules27144349), 2022-07-07
Supplement: s1 [file s1]

## ***N*-Phenacyldibromobenzimidazoles – synthesis optimization and evaluation of their cytotoxic activity**

**Anna Kowalkowska<sup>1,\*</sup>, Konrad Chojnacki<sup>1</sup>, Maciej Multan<sup>1</sup>, Jan K. Maurin<sup>2</sup>,  
Edyta Łukowska-Chojnacka<sup>1</sup> and Patrycja Wińska<sup>1</sup>**

<sup>1</sup> Warsaw University of Technology, Faculty of Chemistry, Noakowskiego St 3, 00-664 Warsaw, Poland, e-mail: [anna.kowalkowska@pw.edu.pl](mailto:anna.kowalkowska@pw.edu.pl), [konrad.chojnacki@pw.edu.pl](mailto:konrad.chojnacki@pw.edu.pl), [edyta.chojnacka@pw.edu.pl](mailto:edyta.chojnacka@pw.edu.pl), [patrycja.winska.pw.edu.pl](mailto:patrycja.winska.pw.edu.pl)

<sup>2</sup> National Medicines Institute, Chełmska St. 30/34, 00-725 Warsaw, Poland  
National Centre for Nuclear Research, Andrzeja Sołtana St. 7, 05-400 Otwock, Poland, e-mail: [j.maurin@nil.gov.pl](mailto:j.maurin@nil.gov.pl)

|                                                                                       |           |
|---------------------------------------------------------------------------------------|-----------|
| <b>1. Isolation of compounds 4 and 5</b>                                              | <b>2</b>  |
| <b>2. Analytical and spectral data of compounds 4 and 5</b>                           | <b>4</b>  |
| <b>3. <sup>1</sup>H and <sup>13</sup>C NMR spectra of compounds 4 and 5</b>           | <b>9</b>  |
| <b>4. HRMS of compounds 4 and 5</b>                                                   | <b>31</b> |
| <b>5. Products of 2,4-dichlorophenacyl chloride 3e<br/>self-condensation reaction</b> | <b>42</b> |
| <b>6. X-ray analysis of compound 5d</b>                                               | <b>64</b> |
| <b>7. Biological analysis</b>                                                         | <b>66</b> |

## 1. Isolation of compounds 4 and 5

**2-(5,6-dibromo-1H-benzimidazol-1-yl)-1-phenylethanone (4a):** 51% yield (0.80 g, off-white solid), solidified residue treated with Et<sub>2</sub>O/MeOH 10/1 v/v.

**2-(5,6-dibromo-1H-benzimidazol-1-yl)-1-(4-fluorophenyl)ethanone (4b):** 60% yield (0.99 g, off-white solid), solidified residue treated with Et<sub>2</sub>O/MeOH 10/1 v/v.

**2-(5,6-dibromo-1H-benzimidazol-1-yl)-1-(4-chlorophenyl)ethanone (4c):** 47% yield (0.81 g, yellowish solid), solidified residue treated with Et<sub>2</sub>O/MeOH 10/1 v/v.

**2-(5,6-dibromo-1H-benzimidazol-1-yl)-1-(4-bromophenyl)ethanone (4d):** 61% yield (1.15 g, yellowish solid), solidified residue treated with Et<sub>2</sub>O/MeOH 10/1 v/v.

**2-(5,6-dibromo-1H-benzimidazol-1-yl)-1-(2,4-dichlorophenyl)ethanone (4e):** 67% yield (1.24 g, yellowish solid), solidified residue treated with Et<sub>2</sub>O or cold EtOAc (if the residue was very dark).

**2-(5,6-dibromo-1H-benzimidazol-1-yl)-1-(3,4-dichlorophenyl)ethanone (4f):** 63% yield (1.17 g, yellowish solid), solidified residue treated with Et<sub>2</sub>O/EtOAc 9/1

**2-(5,6-dibromo-1H-benzimidazol-1-yl)-1-(2,4,6-trichlorophenyl)ethanone (4g):** dark oily residue purified by column chromatography (silica gel, eluent: chloroform), 41% yield (0.81 g, oil solidifying to yellowish solid).

**2-(5,6-dibromo-1H-benzimidazol-1-yl)-1-(2,4-difluorophenyl)ethanone (4h):** dark oily residue purified by column chromatography (silica gel, eluent: chloroform), 48% yield (0.83 g, light brown oil, solidifying after treating with acetone), solid product filtered and washed with Et<sub>2</sub>O (off-white solid).

**2-(5,6-dibromo-1H-benzimidazol-1-yl)-1-(2,5-difluorophenyl)ethanone (4i):** 65% yield (1.12 g, pale beige solid), solidified residue treated with Et<sub>2</sub>O.

**2-(5,6-dibromo-1H-benzimidazol-1-yl)-1-(2,4,6-trifluorophenyl)ethanone (4j):** dark oily residue purified by column chromatography (silica gel, eluent: chloroform), 54% yield (0.97 g, yellowish solid).

**2-(4,6-dibromo-1H-benzimidazol-1-yl)-1-phenylethanone (5a):** 82% (1.29 g, off-white solid), solidified residue treated with Et<sub>2</sub>O/MeOH 10/1 v/v.

**2-(4,6-dibromo-1H-benzimidazol-1-yl)-1-(4-fluorophenyl)ethanone (5b):** 89% yield (1.47 g, off-white solid), solidified residue treated with Et<sub>2</sub>O/MeOH 10/1 v/v.

**2-(4,6-dibromo-1H-benzimidazol-1-yl)-1-(4-chlorophenyl)ethanone (5c):** 83% yield (1.41 g, off-white solid), solidified residue treated with Et<sub>2</sub>O/MeOH 10/1 v/v.

**2-(4,6-dibromo-1H-benzimidazol-1-yl)-1-(4-bromophenyl)ethanone (5d):** 84% yield (1.59 g, yellowish solid), solidified residue treated with Et<sub>2</sub>O/MeOH 10/1 v/v.

**2-(4,6-dibromo-1*H*-benzimidazol-1-yl)-1-(2,4-dichlorophenyl)ethanone (5e):** 80% yield (1.48 g, yellow solid), solidified residue treated with Et<sub>2</sub>O or cold EtOAc (if the residue was very dark).

**2-(4,6-dibromo-1*H*-benzimidazol-1-yl)-1-(3,4-dichlorophenyl)ethanone (5f):** 77% yield (1.43 g, yellow solid), solidified residue treated with Et<sub>2</sub>O/acetone 6/1 (v/v).

**2-(4,6-dibromo-1*H*-benzimidazol-1-yl)-1-(2,4,6-trichlorophenyl)ethanone (5g):** dark oily residue purified by column chromatography (silica gel, eluent: chloroform), 39% yield (0.78 g, oil solidifying to yellowish solid).

**2-(4,6-dibromo-1*H*-benzimidazol-1-yl)-1-(2,4-difluorophenyl)ethanone (5h):** 74% yield (1.27 g, off-white solid), solidified residue treated with Et<sub>2</sub>O.

**2-(4,6-dibromo-1*H*-benzimidazol-1-yl)-1-(2,5-difluorophenyl)ethanone (5i):** 59% yield (1.01 g, off-white solid), solidified residue treated with Et<sub>2</sub>O.

**2-(4,6-dibromo-1*H*-benzimidazol-1-yl)-1-(2,4,6-trifluorophenyl)ethanone (5j):** dark oily residue purified by column chromatography (silica gel, eluent: chloroform), 57% yield (1.02 g, light brown oil, solidifying after treating with acetone), solid product filtered and washed with Et<sub>2</sub>O (off-white solid).

## 2. Analytical and spectral data of compounds 4 and 5

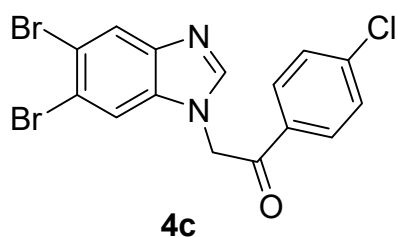

**2-(5,6-dibromo-1H-benzimidazol-1-yl)-1-(4-chlorophenyl)ethanone (4c):** white crystals, m.p. = 188-189 °C (MeOH);  $^1\text{H}$  NMR (500 MHz, DMSO- $d_6$ )  $\delta$  = 6.04 (s, 2H, CH<sub>2</sub>), 7.70-7.73 (m, 2H, C<sub>6</sub>H<sub>4</sub>), 8.08-8.11 (m, 2H, C<sub>6</sub>H<sub>4</sub> and 1H, CH=N), 8.20 (s, 1H, C<sub>6</sub>H<sub>2</sub>), 8.25 (s, 1H, C<sub>6</sub>H<sub>2</sub>);  $^{13}\text{C}$  NMR (125 MHz, DMSO- $d_6$ )  $\delta$  = 51.21, 115.83, 116.75, 123.64, 128.97, 130.07, 133.06, 135.18, 138.86, 143.59, 147.21, 192.07; HRMS: calculated for C<sub>15</sub>H<sub>10</sub>Br<sub>2</sub>ClN<sub>2</sub>O [M+H]<sup>+</sup>: 426.88429, 428.88225, 430.88020. Found: 426.88530, 428.88283, 430.88071.

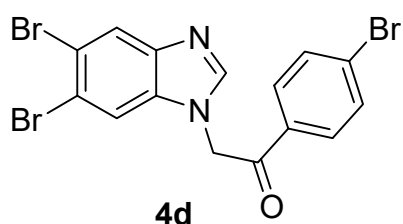

**2-(5,6-dibromo-1H-benzimidazol-1-yl)-1-(4-bromophenyl)ethanone (4d):** off-white crystals, m.p. = 211-212 °C (MeOH);  $^1\text{H}$  NMR (500 MHz, DMSO- $d_6$ )  $\delta$  = 6.03 (s, 2H, CH<sub>2</sub>), 7.85-7.86 (m, 2H, C<sub>6</sub>H<sub>4</sub>), 8.00-8.02 (m, 2H, C<sub>6</sub>H<sub>4</sub>), 8.10 (s, 1H, CH=N), 8.20 (s, 1H, C<sub>6</sub>H<sub>2</sub>), 8.25 (s, 1H, C<sub>6</sub>H<sub>2</sub>);  $^{13}\text{C}$  NMR (125 MHz, DMSO- $d_6$ )  $\delta$  = 51.18, 115.83, 116.75, 123.62, 128.07, 130.13, 131.92, 133.37, 135.17, 143.59, 147.21, 192.28; HRMS: calculated for C<sub>15</sub>H<sub>10</sub>Br<sub>3</sub>N<sub>2</sub>O [M+H]<sup>+</sup>: 470.83378, 472.83173, 474.82968. Found: 470.83430, 472.83201, 474.82978.

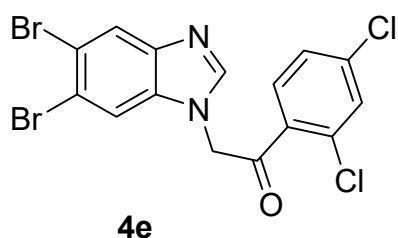

**2-(5,6-dibromo-1H-benzimidazol-1-yl)-1-(2,4-dichlorophenyl)ethanone (4e):** yellowish crystals, m.p. = 193-194 °C (EtOH);  $^1\text{H}$  NMR (500 MHz, DMSO- $d_6$ )  $\delta$  = 5.93 (s, 2H, CH<sub>2</sub>), 7.71 (dd,  $J$  = 8.31 Hz,  $J$  = 1.96 Hz, 1H, C<sub>6</sub>H<sub>3</sub>), 7.85 (d,  $J$  = 1.96 Hz, 1H, C<sub>6</sub>H<sub>3</sub>), 8.11 (s, 1H, CH=N), 8.11 (d,  $J$  = 8.31 Hz, 1H, C<sub>6</sub>H<sub>3</sub>), 8.17 (s, 1H, C<sub>6</sub>H<sub>2</sub>), 8.27 (s, 1H, C<sub>6</sub>H<sub>2</sub>);  $^{13}\text{C}$  NMR (125 MHz, DMSO- $d_6$ )  $\delta$

= 53.20, 115.77, 115.98, 116.85, 123.70, 127.62, 130.60, 131.83, 132.40, 133.17, 134.93, 137.51, 143.58, 147.08, 193.29; HRMS: calculated for  $C_{15}H_9Br_2Cl_2N_2O$   $[M+H]^+$ : 460.84532, 462.84327, 464.84032. Found: 460.84566, 462.84318, 464.84054.

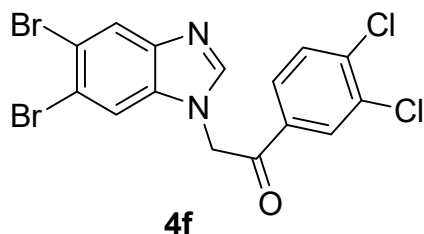

**2-(5,6-dibromo-1H-benzimidazol-1-yl)-1-(3,4-dichlorophenyl)ethanone (4f):** white crystals, m.p. = 212-213 °C (EtOH);  $^1H$  NMR (500 MHz, DMSO- $d_6$ )  $\delta$  = 6.05 (s, 2H, CH<sub>2</sub>), 7.92 (d,  $J$  = 8.31 Hz, 1H, C<sub>6</sub>H<sub>3</sub>), 8.02 (dd,  $J$  = 8.31 Hz,  $J$  = 1.96 Hz, 1H, C<sub>6</sub>H<sub>3</sub>), 8.11 (s, 1H, CH=N), 8.21 (s, 1H, C<sub>6</sub>H<sub>2</sub>), 8.25 (s, 1H, C<sub>6</sub>H<sub>2</sub>), 8.32 (d,  $J$  = 1.96 Hz, 1H, C<sub>6</sub>H<sub>3</sub>);  $^{13}C$  NMR (125 MHz, DMSO- $d_6$ )  $\delta$  = 51.37, 115.85, 115.93, 116.83, 123.67, 128.15, 130.17, 131.24, 131.90, 134.60, 135.13, 136.72, 143.58, 147.15, 191.47; HRMS: calculated for  $C_{15}H_9Br_2Cl_2N_2O$   $[M+H]^+$ : 460.84532, 462.84327, 464.84032. Found: 460.84585, 462.84342, 464.84097.

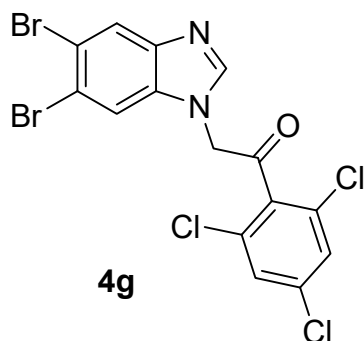

**2-(5,6-dibromo-1H-benzimidazol-1-yl)-1-(2,4,6-trichlorophenyl)ethanone (4g):** off white crystals, m.p. = 197-198 °C (EtOH);  $^1H$  NMR (500 MHz, DMSO- $d_6$ )  $\delta$  = 5.87 (s, 2H, CH<sub>2</sub>), 7.93 (s, 2H, C<sub>6</sub>H<sub>2</sub>), 7.97 (s, 1H, CH=N), 8.14 (s, 1H, C<sub>6</sub>H<sub>2</sub>Br<sub>2</sub>), 8.36 (s, 1H, C<sub>6</sub>H<sub>2</sub>Br<sub>2</sub>);  $^{13}C$  NMR (125 MHz, DMSO- $d_6$ )  $\delta$  = 53.86, 115.37, 116.30, 117.04, 124.00, 128.61, 130.94, 134.47, 134.84, 136.36, 143.63, 146.99, 195.89; HRMS: calculated for  $C_{15}H_8Br_2Cl_3N_2O$   $[M+H]^+$ : 494.80635, 496.80430, 498.80135. Found: 494.80759, 496.80500, 498.80239.

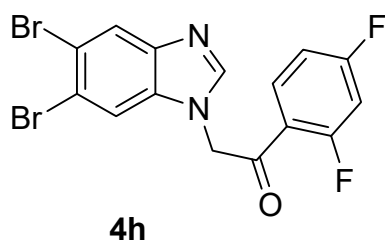

**2-(5,6-dibromo-1H-benzimidazol-1-yl)-1-(2,4-difluorophenyl)ethanone (4h):** white crystals, m.p. = 135-136 °C (EtOH);  $^1\text{H}$  NMR (500 MHz, DMSO- $d_6$ )  $\delta$  = 5.85 (d,  $J$  = 3.42 Hz, 2H, CH<sub>2</sub>), 7.32 (dd,  $J$  = 8.31 Hz,  $J$  = 2.45 Hz, 1H, C<sub>6</sub>H<sub>3</sub>), 7.55-7.60 (m, 1H, C<sub>6</sub>H<sub>3</sub>), 8.04-8.10 (m, 1H, C<sub>6</sub>H<sub>3</sub>), 8.09 (s, 1H, CH=N), 8.21 (s, 1H, C<sub>6</sub>H<sub>2</sub>), 8.23 (s, 1H, C<sub>6</sub>H<sub>2</sub>);  $^{13}\text{C}$  NMR (125 MHz, DMSO- $d_6$ )  $\delta$  = 54.01 (d,  $J$  = 11.74 Hz), 105.08-105.50 (m, 3 lines), 112.66 (dd,  $J$  = 22.50 Hz,  $J$  = 2.93 Hz), 115.84, 116.01, 116.75, 119.75 (dd,  $J$  = 13.69 Hz,  $J$  = 3.91 Hz), 123.59, 132.57-132.70 (m, 4 lines), 135.19, 143.61, 147.19, 161.73, 162.71 (dd,  $J$  = 258.23 Hz,  $J$  = 13.69 Hz), 165.70 (dd,  $J$  = 155.30 Hz,  $J$  = 12.72 Hz), 189.49 (d,  $J$  = 5.87 Hz); HRMS: calculated for C<sub>15</sub>H<sub>9</sub>Br<sub>2</sub>F<sub>2</sub>N<sub>2</sub>O [M+H]<sup>+</sup>: 428.90442, 430.90237, 432.90033. Found: 428.90485, 430.90257, 432.90023.

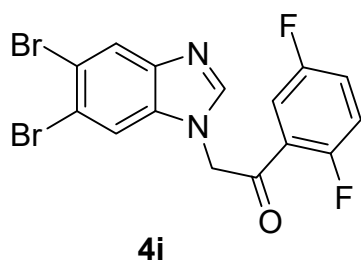

**2-(5,6-dibromo-1H-benzimidazol-1-yl)-1-(2,5-difluorophenyl)ethanone (4i):** yellowish crystals, m.p. = 187-188 °C (EtOH);  $^1\text{H}$  NMR (500 MHz, DMSO- $d_6$ )  $\delta$  = 5.87 (d,  $J$  = 3.42 Hz, 2H, CH<sub>2</sub>), 7.56-7.60 (m, 1H, C<sub>6</sub>H<sub>3</sub>), 7.65-7.70 (m, 1H, C<sub>6</sub>H<sub>3</sub>), 7.72-7.76 (m, 1H, C<sub>6</sub>H<sub>3</sub>), 8.10 (s, 1H, CH=N), 8.23 (s, 1H, C<sub>6</sub>H<sub>2</sub>), 8.23 (s, 1H, C<sub>6</sub>H<sub>2</sub>);  $^{13}\text{C}$  NMR (125 MHz, DMSO- $d_6$ )  $\delta$  = 54.06 (d,  $J$  = 11.74 Hz), 115.83-116.06 (m, 4 lines), 116.77, 118.95-119.23 (m, 4 lines), 122.72 (dd,  $J$  = 24.45 Hz,  $J$  = 9.78 Hz), 123.59, 123.92 (dd,  $J$  = 16.63 Hz,  $J$  = 6.85 Hz), 135.13, 143.61, 147.13, 156.94-159.04 (m, 6 lines), 189.78-189.83 (m, 3 lines); HRMS: calculated for C<sub>15</sub>H<sub>9</sub>Br<sub>2</sub>F<sub>2</sub>N<sub>2</sub>O [M+H]<sup>+</sup>: 428.90442, 430.90237, 432.90033. Found: 428.90438, 430.90256, 432.90029.

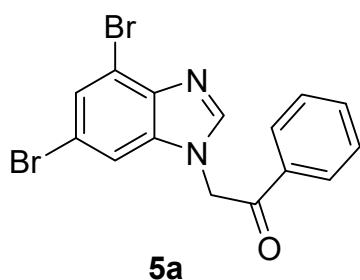

**2-(4,6-dibromo-1H-benzimidazol-1-yl)-1-phenylethanone (5a):** white crystals, m.p. = 211-212 °C (MeOH);  $^1\text{H}$  NMR (500 MHz, DMSO- $d_6$ )  $\delta$  = 6.07 (s, 2H, CH<sub>2</sub>), 7.62-7.65 (m, 2H, C<sub>6</sub>H<sub>5</sub>), 7.64 (d,  $J$  = 1.71 Hz, 1H, C<sub>6</sub>H<sub>2</sub>), 7.73-7.77 (m, 1H, C<sub>6</sub>H<sub>5</sub>), 8.02 (d,  $J$  = 1.71 Hz, 1H, C<sub>6</sub>H<sub>2</sub>), 8.08-8.10 (m, 2H, C<sub>6</sub>H<sub>5</sub>), 8.31 (s, 1H, CH=N).  $^{13}\text{C}$  NMR (125 MHz, DMSO- $d_6$ )  $\delta$  = 51.48, 113.22, 113.78, 114.90, 126.53, 128.22, 128.90, 134.10, 134.31, 136.32, 140.88, 146.62, 192.87. HRMS: calculated for C<sub>15</sub>H<sub>11</sub>Br<sub>2</sub>N<sub>2</sub>O [M+H]<sup>+</sup>: 392.92326, 394.92122, 396.91917. Found: 392.92422, 394.92190, 396.92023.

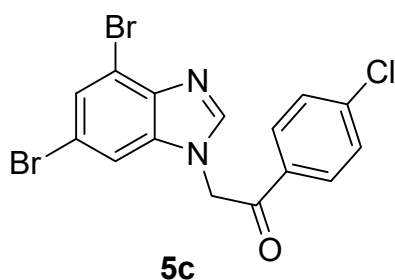

**2-(4,6-dibromo-1H-benzimidazol-1-yl)-1-(4-chlorophenyl)ethanone (5c):** white crystals, m.p. = 228-230 °C (MeOH);  $^1\text{H}$  NMR (500 MHz, DMSO- $d_6$ )  $\delta$  = 6.05 (s, 2H, CH<sub>2</sub>), 7.64 (d,  $J$  = 1.71 Hz, 1H, C<sub>6</sub>H<sub>2</sub>), 7.70-7.73 (m, 2H, C<sub>6</sub>H<sub>4</sub>), 8.02 (d,  $J$  = 1.47 Hz, 1H, C<sub>6</sub>H<sub>2</sub>), 8.08-8.11 (m, 2H, C<sub>6</sub>H<sub>4</sub>), 8.30 (s, 1H, CH=N);  $^{13}\text{C}$  NMR (125 MHz, DMSO- $d_6$ )  $\delta$  = 51.75, 112.67, 114.08, 115.35, 127.08, 129.04, 130.16, 133.00, 136.02, 139.00, 139.70, 146.41, 191.85; HRMS: calculated for C<sub>15</sub>H<sub>10</sub>Br<sub>2</sub>ClN<sub>2</sub>O [M+H]<sup>+</sup>: 426.88429, 428.88225, 430.88020. Found: 426.88505, 428.88227, 430.88039.

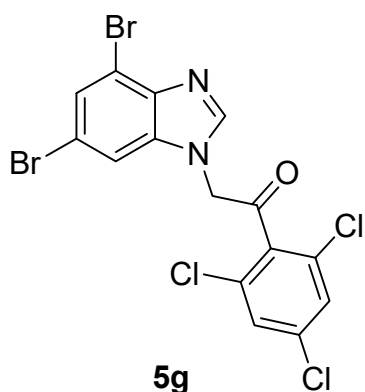

**2-(4,6-dibromo-1H-benzimidazol-1-yl)-1-(2,4,6-trichlorophenyl)ethanone (5g):** off white crystals, m.p. = 212-214 °C (EtOH);  $^1\text{H}$  NMR (500 MHz, DMSO- $d_6$ )  $\delta$  = 5.89 (s, 2H, CH<sub>2</sub>), 7.69 (d,  $J$  = 1.51 Hz, 1H, C<sub>6</sub>H<sub>2</sub>Br<sub>2</sub>), 7.78 (d,  $J$  = 1.67 Hz, 1H, C<sub>6</sub>H<sub>2</sub>Br<sub>2</sub>), 7.94 (s, 2H, C<sub>6</sub>H<sub>2</sub>), 8.40 (s, 1H, CH=N);  $^{13}\text{C}$  NMR (125 MHz, DMSO- $d_6$ )  $\delta$  = 54.09, 113.31, 113.59, 115.10, 126.97, 128.63, 130.97, 134.80, 135.53, 136.40, 140.93, 146.29, 195.75; HRMS: calculated for C<sub>15</sub>H<sub>8</sub>Br<sub>2</sub>Cl<sub>3</sub>N<sub>2</sub>O [M+H]<sup>+</sup>: 494.80635, 496.80430, 498.80135. Found: 494.80770, 496.80501, 498.80238.

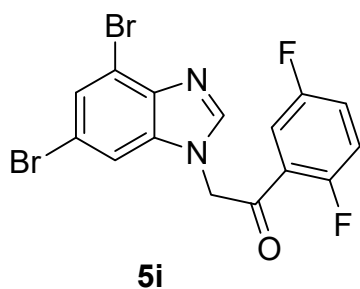

**2-(4,6-dibromo-1H-benzimidazol-1-yl)-1-(2,5-difluorophenyl)ethanone (5i):** off white crystals, m.p. = 134-135 °C (EtOH);  $^1\text{H}$  NMR (500 MHz, DMSO- $d_6$ )  $\delta$  = 5.88 (d,  $J$  = 3.42 Hz, 2H, CH<sub>2</sub>), 7.56-7.61 (m, 1H, C<sub>6</sub>H<sub>3</sub>), 7.64 (d,  $J$  = 1.71 Hz, 1H, C<sub>6</sub>H<sub>2</sub>), 7.65-7.70 (m, 1H, C<sub>6</sub>H<sub>3</sub>), 7.72-7.76 (m, 1H, C<sub>6</sub>H<sub>3</sub>), 8.05 (d,  $J$  = 1.71 Hz, 1H, C<sub>6</sub>H<sub>2</sub>), 8.27 (s, 1H, CH=N);  $^{13}\text{C}$  NMR (125 MHz, DMSO- $d_6$ )  $\delta$  = 54.29 (d,  $J$  = 10.76 Hz), 113.14, 113.93, 114.89, 115.84-116.07 (m, 4 lines), 118.96-119.24 (m, 4 lines), 122.62-122.89 (m, 4 lines), 123.88 (dd,  $J$  = 16.63 Hz,  $J$  = 6.85 Hz), 126.52, 136.21, 140.84, 146.42, 156.95-159.04 (m, 7 lines), 189.66-189.72 (m, 3 lines); HRMS: calculated for C<sub>15</sub>H<sub>9</sub>Br<sub>2</sub>F<sub>2</sub>N<sub>2</sub>O [M+H]<sup>+</sup>: 428.90442, 430.90237, 432.90033. Found: 428.90480, 430.90257, 432.90029.



### 3. $^1\text{H}$ and $^{13}\text{C}$ NMR spectra of compounds 4 and 5

#### 2-(5,6-dibromo-1*H*-benzimidazol-1-yl)-1-(4-chlorophenyl)ethanone (4c)

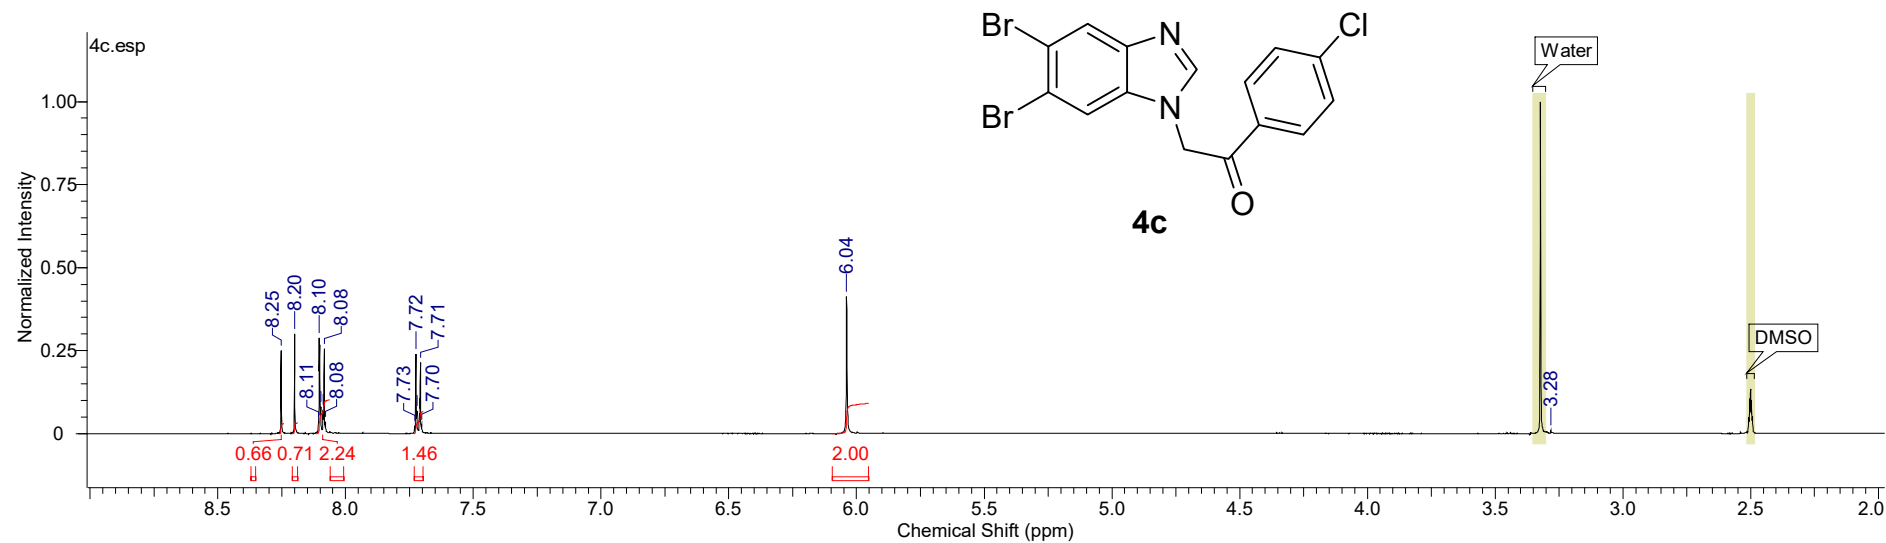

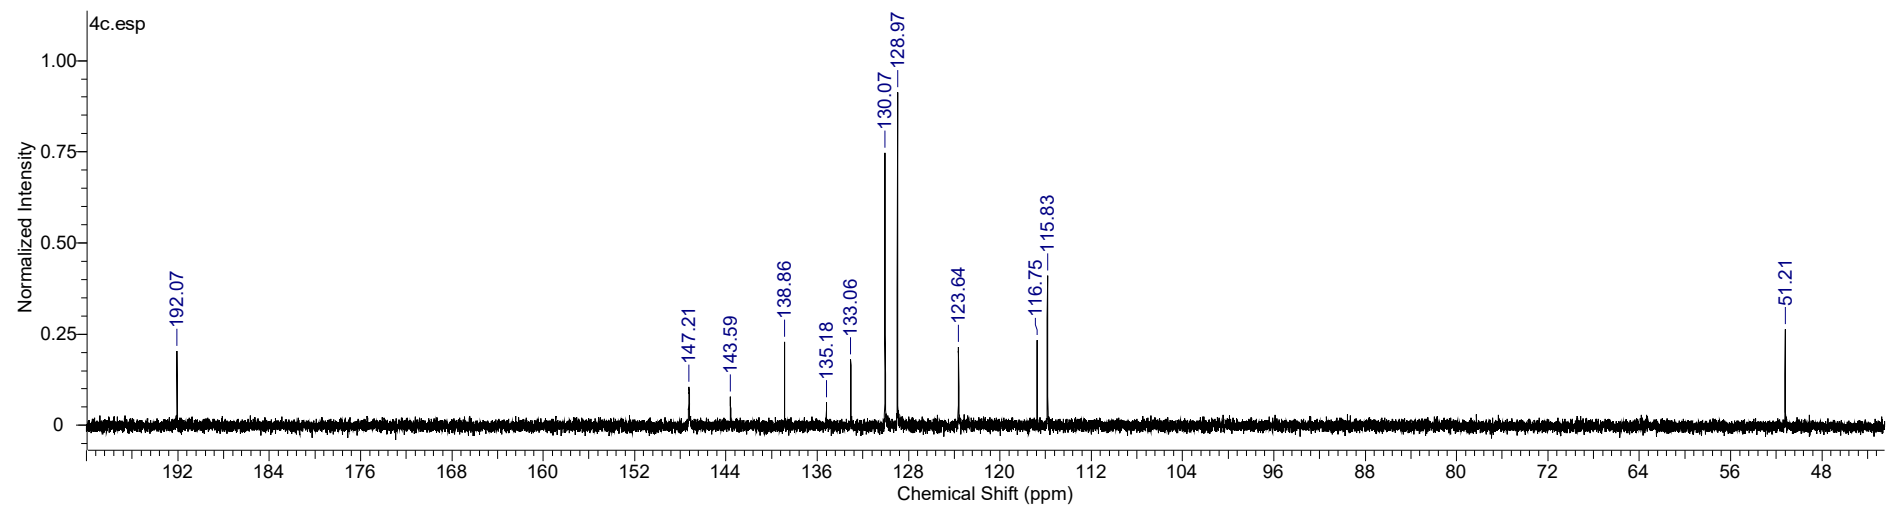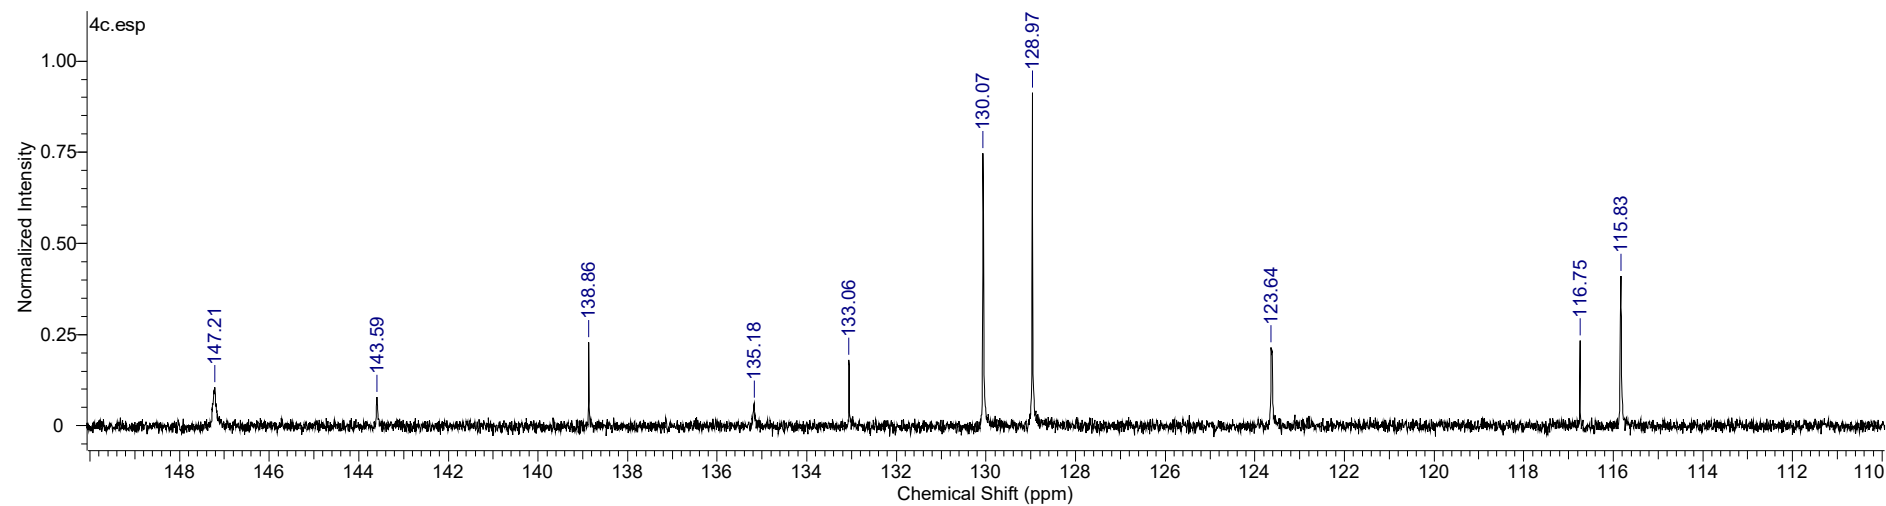

## 2-(5,6-dibromo-1*H*-benzimidazol-1-yl)-1-(4-bromophenyl)ethanone (4d)

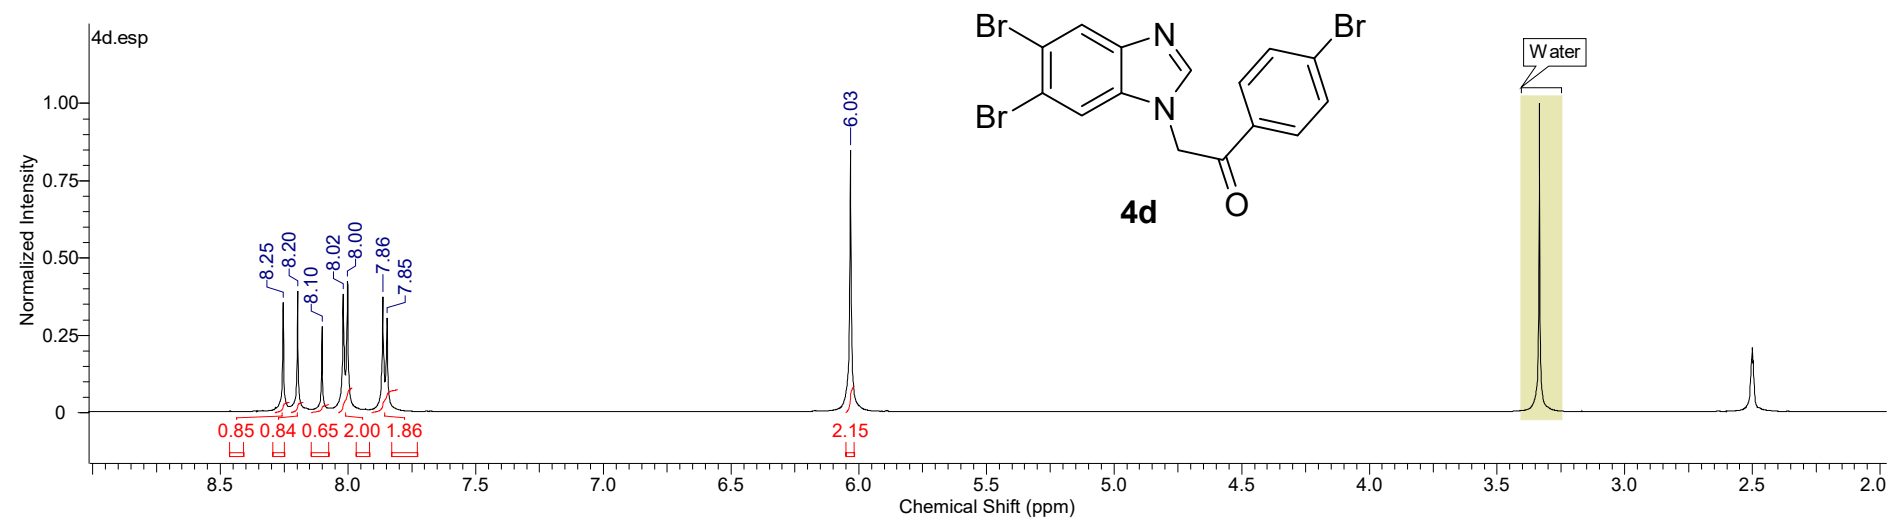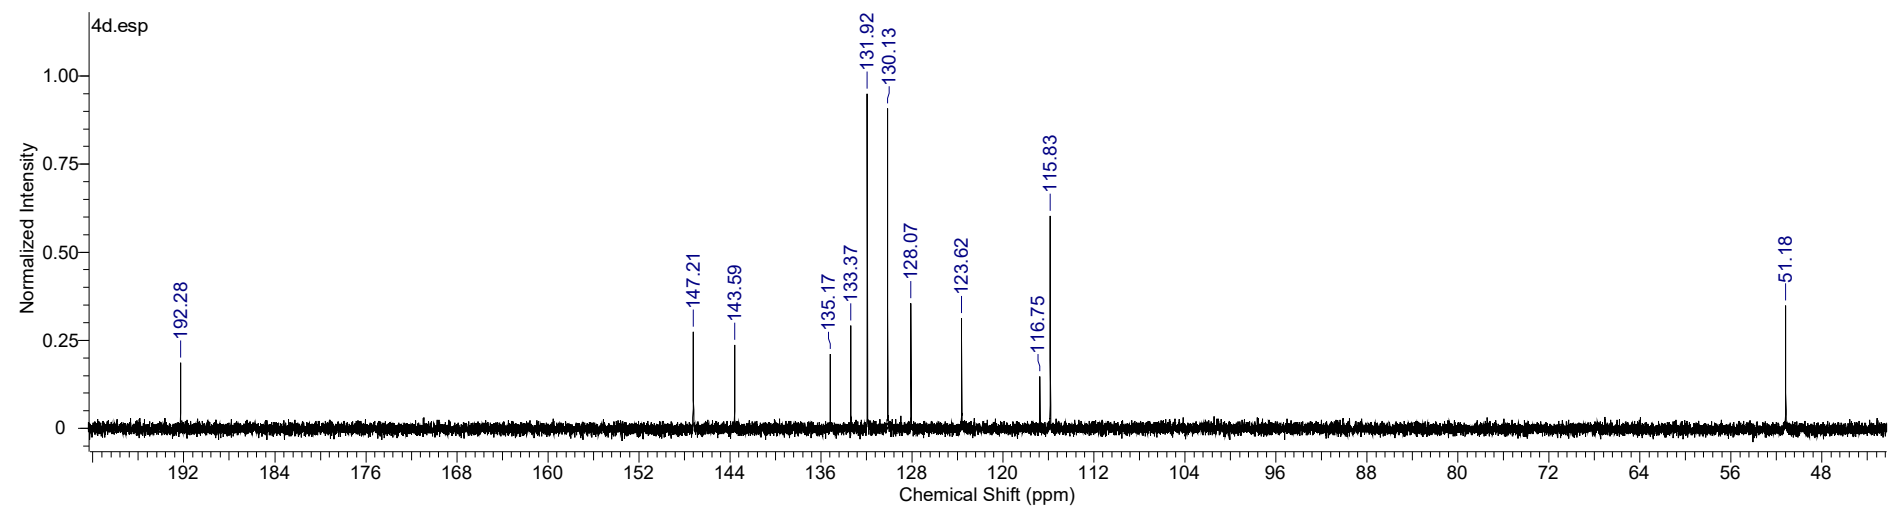

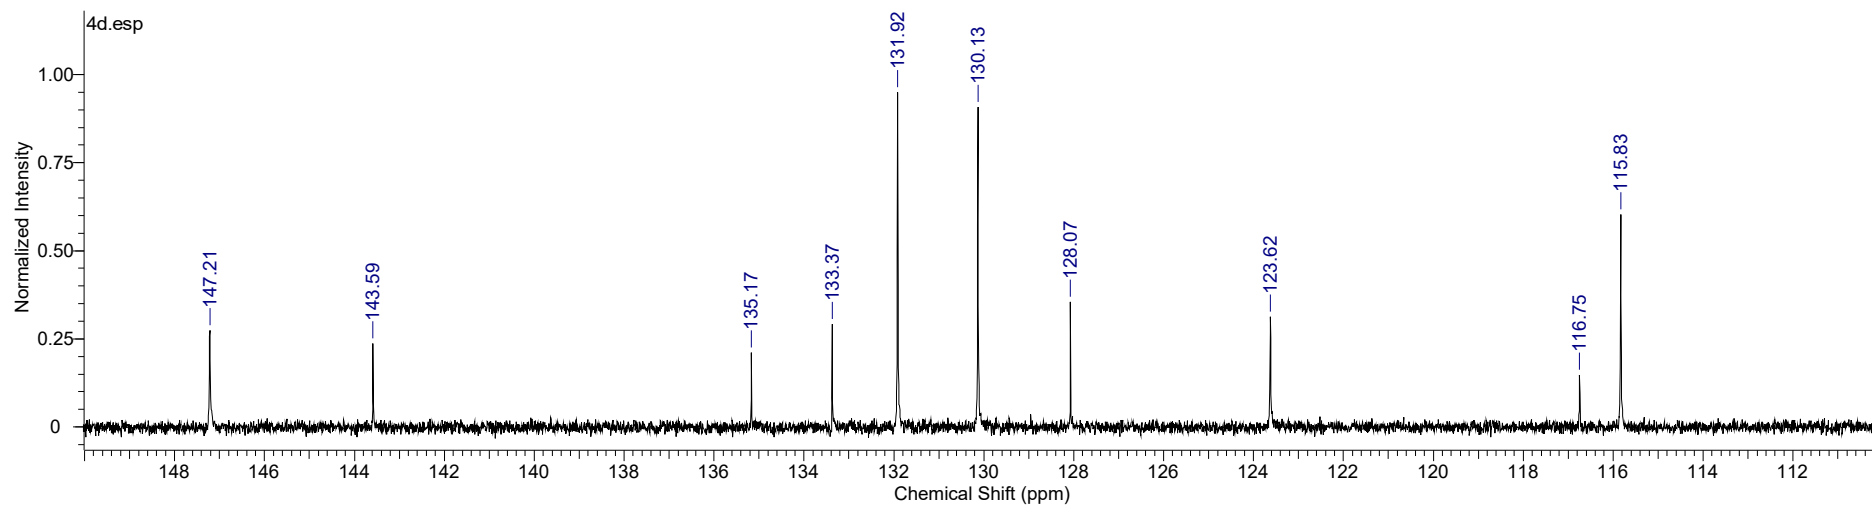

**2-(5,6-dibromo-1*H*-benzimidazol-1-yl)-1-(2,4-dichlorophenyl)ethanone (4e)**

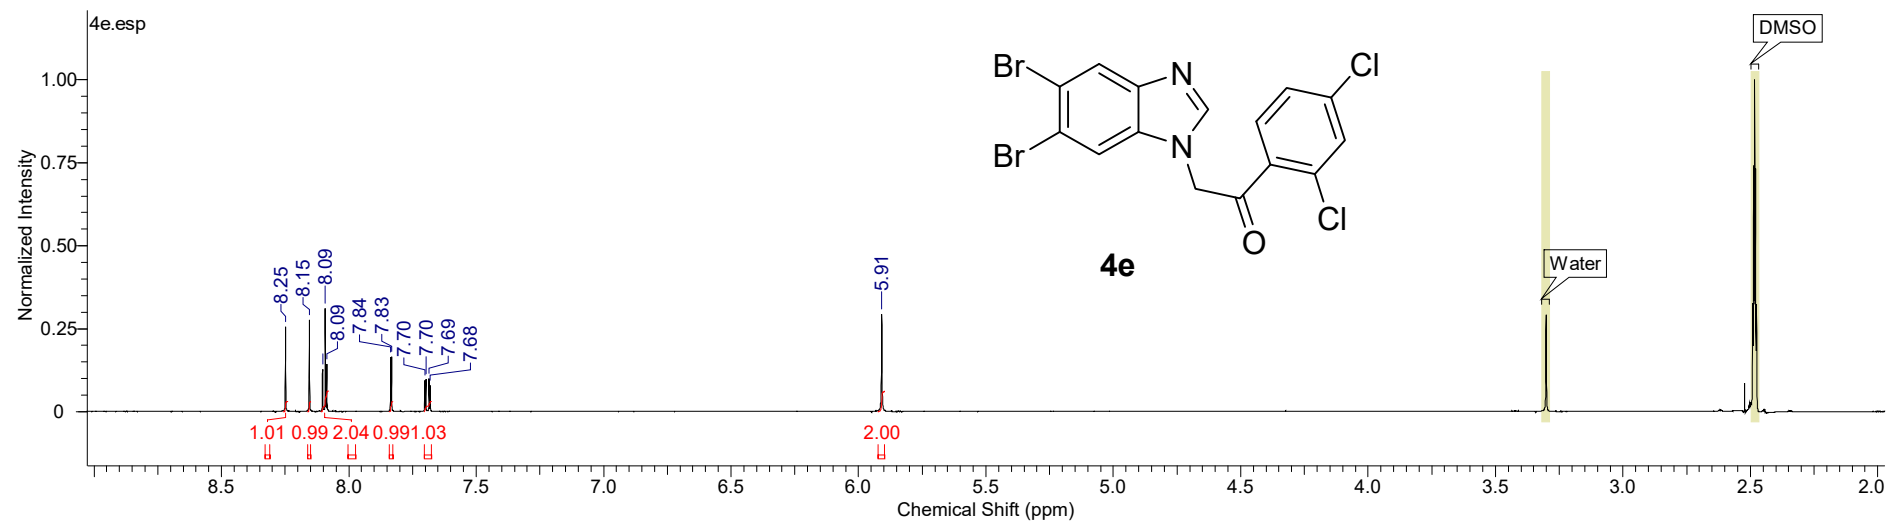

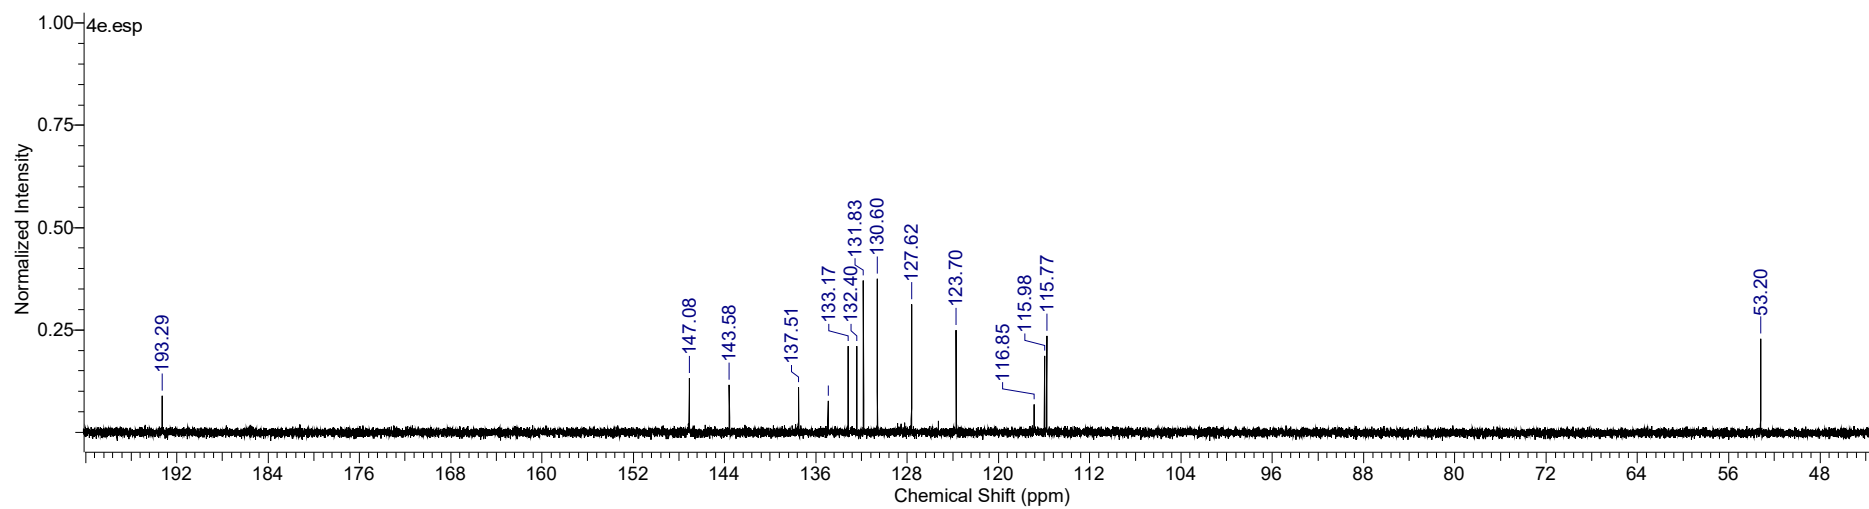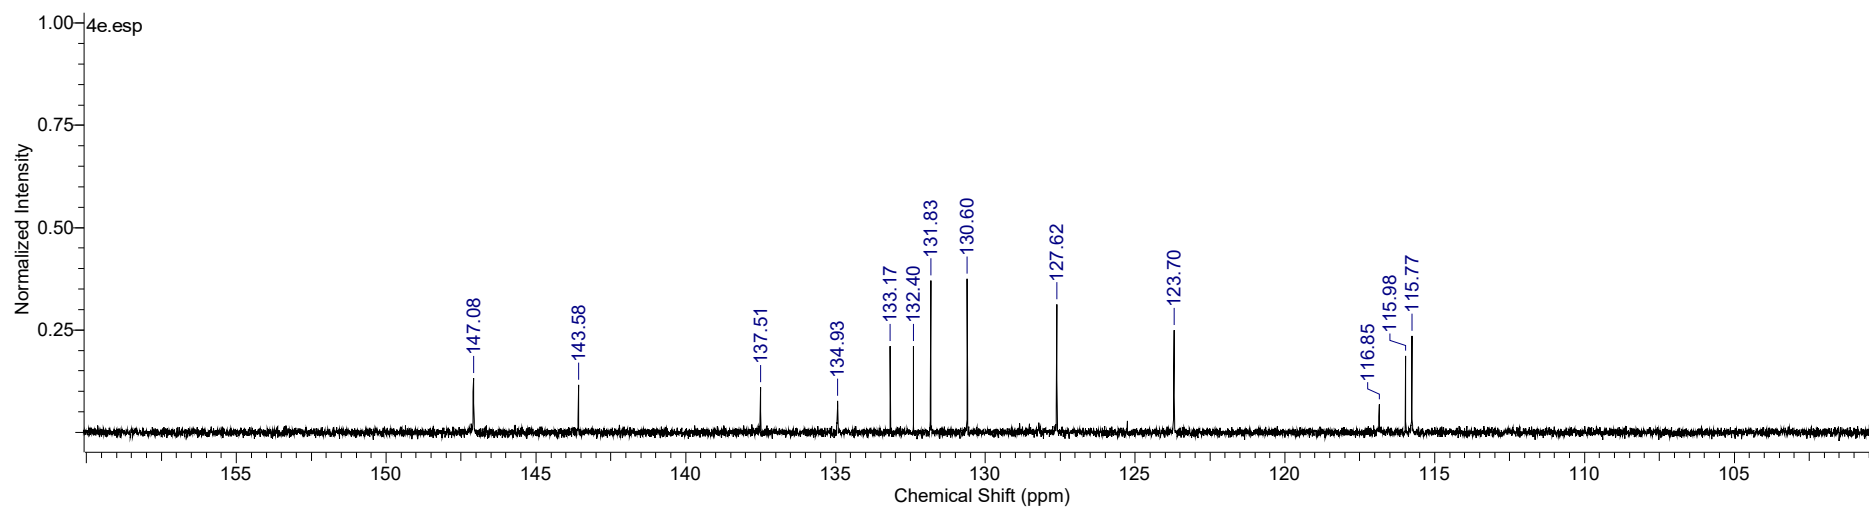

**2-(5,6-dibromo-1*H*-benzimidazol-1-yl)-1-(3,4-dichlorophenyl)ethanone (4f)**

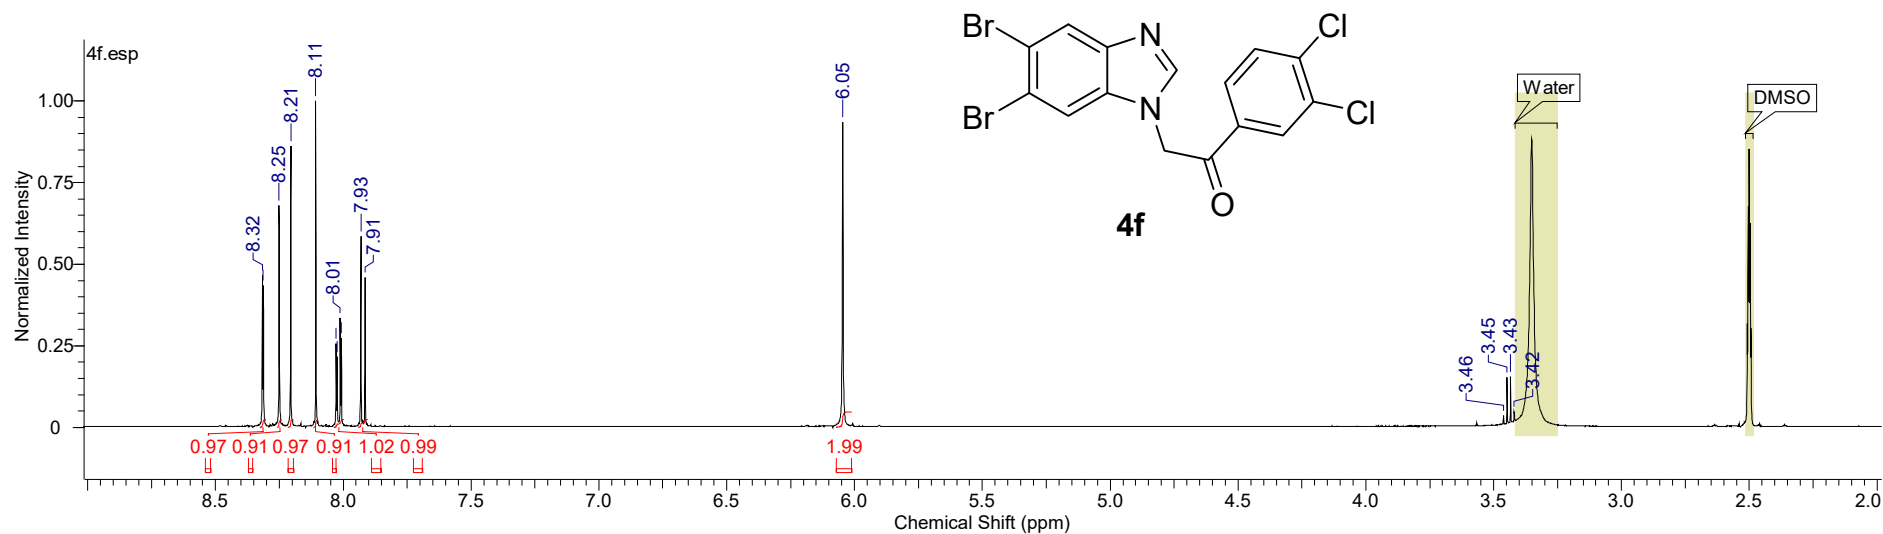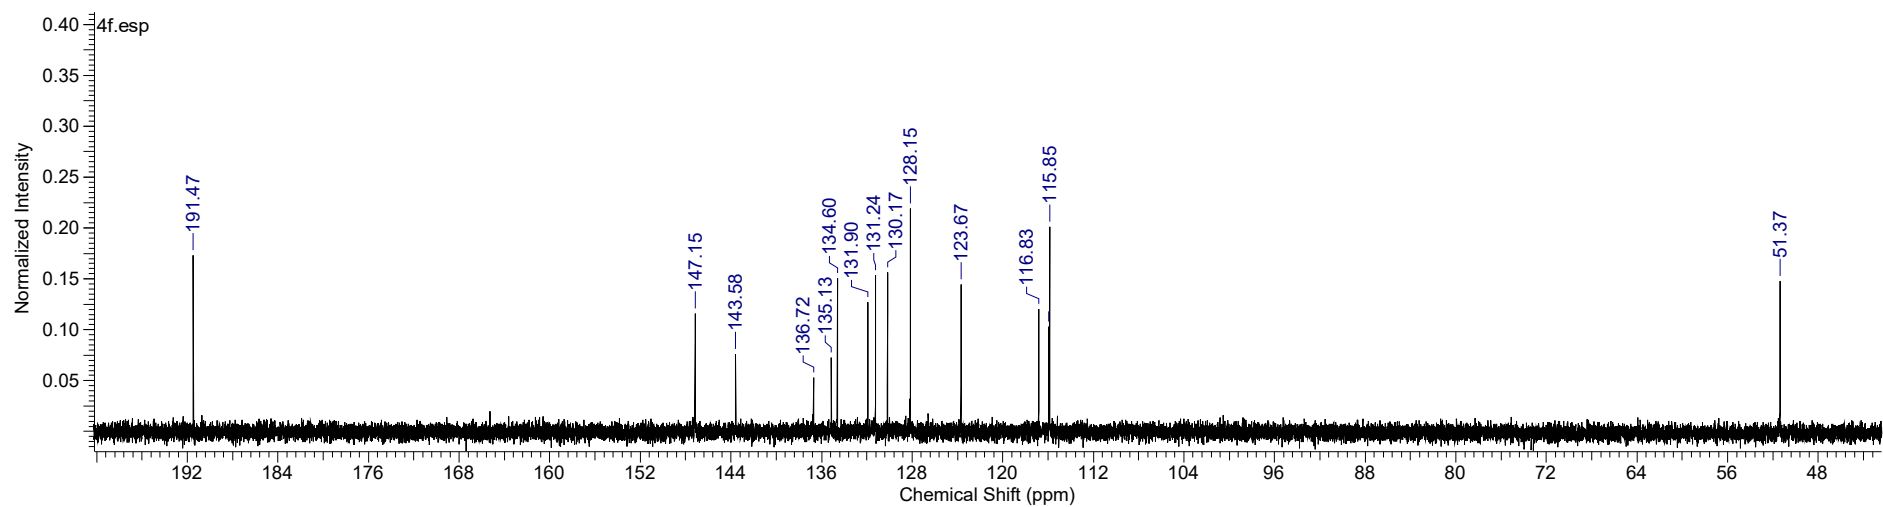

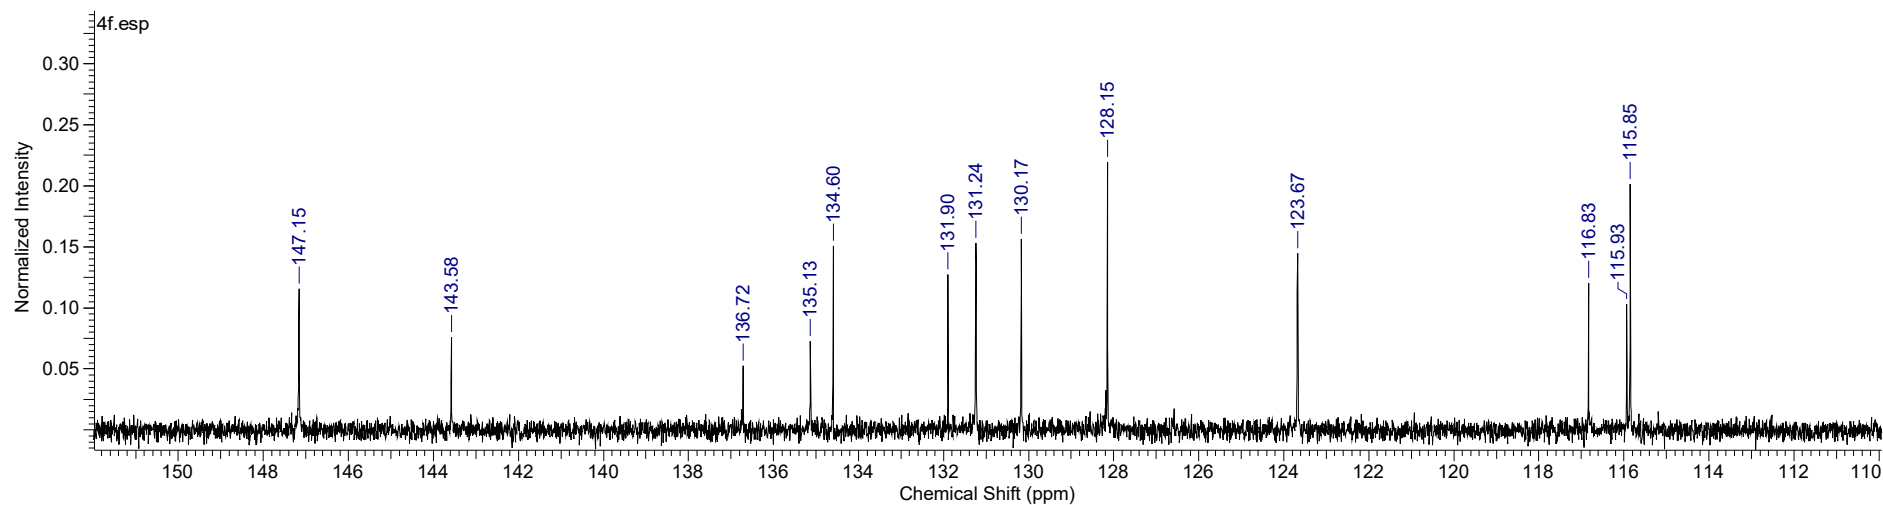

**2-(5,6-dibromo-1*H*-benzimidazol-1-yl)-1-(2,4,6-trichlorophenyl)ethanone (4g)**

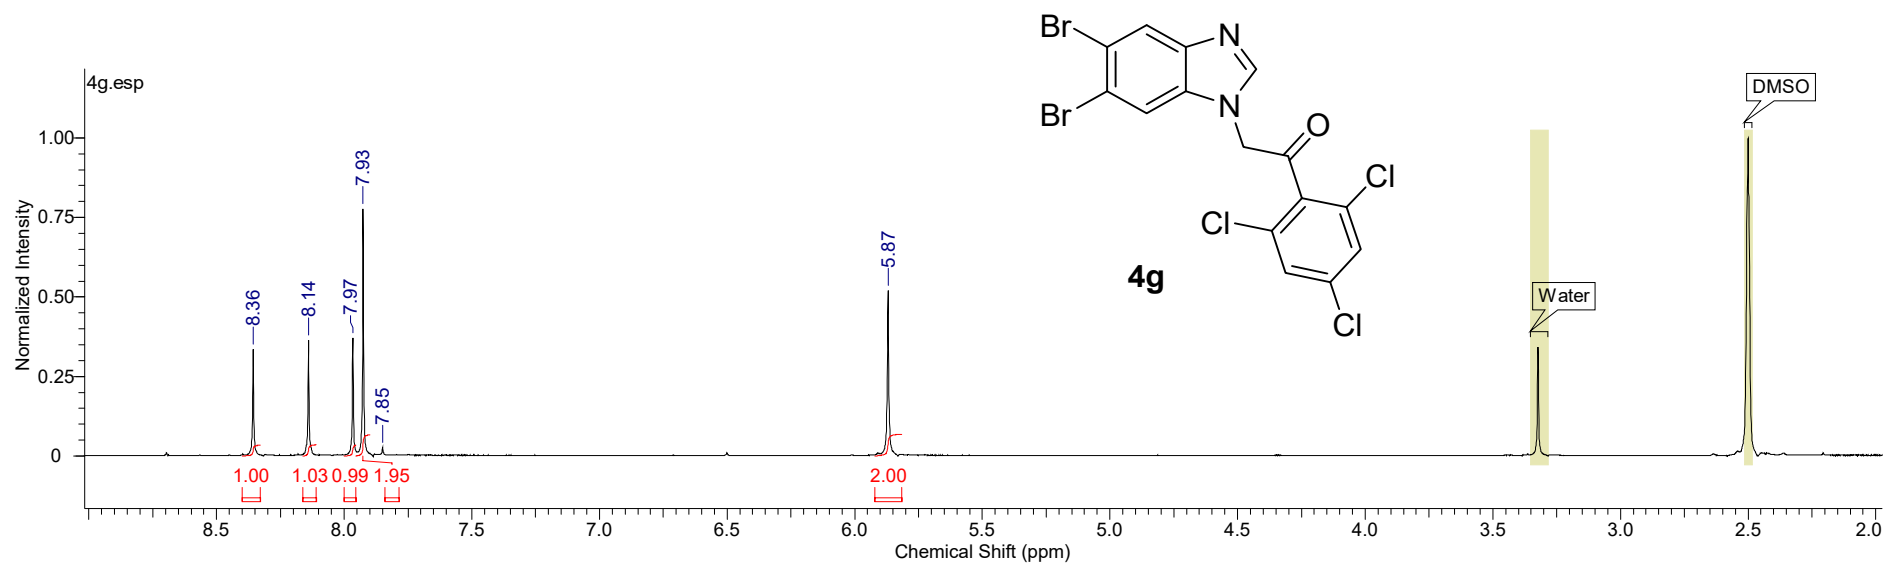

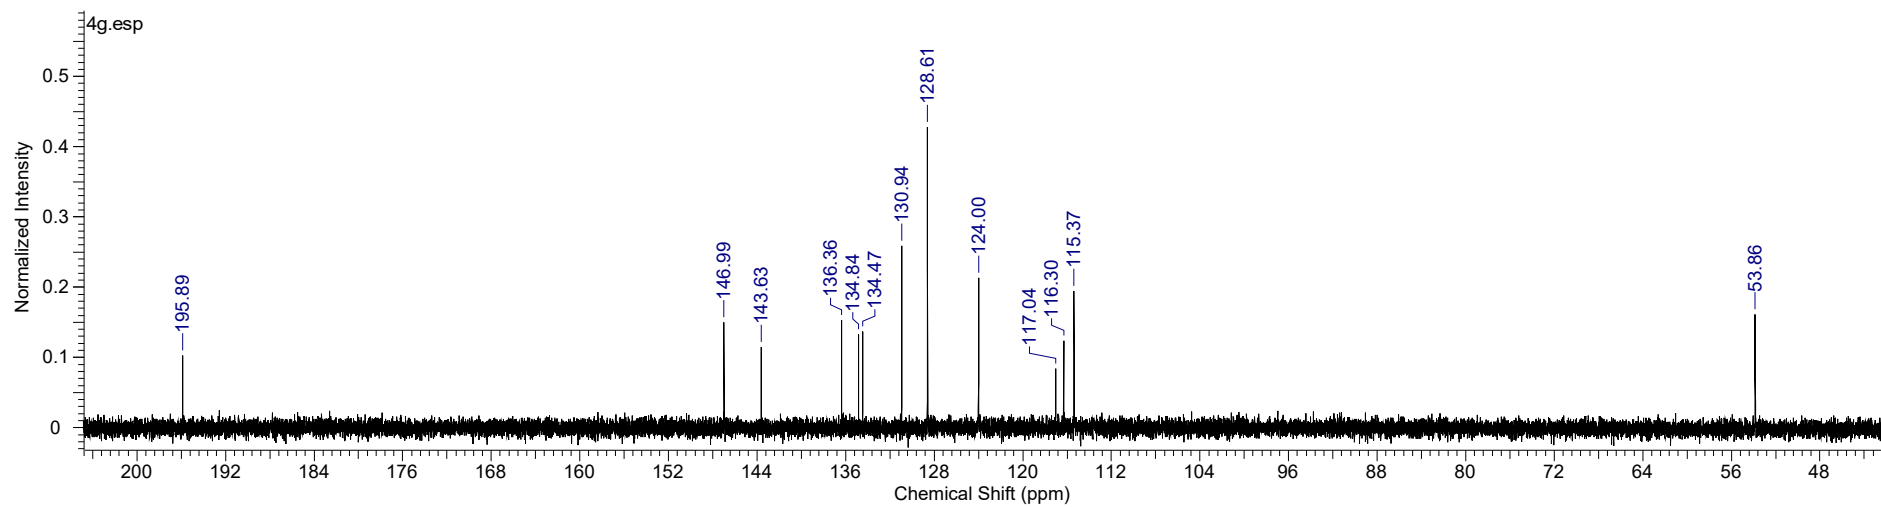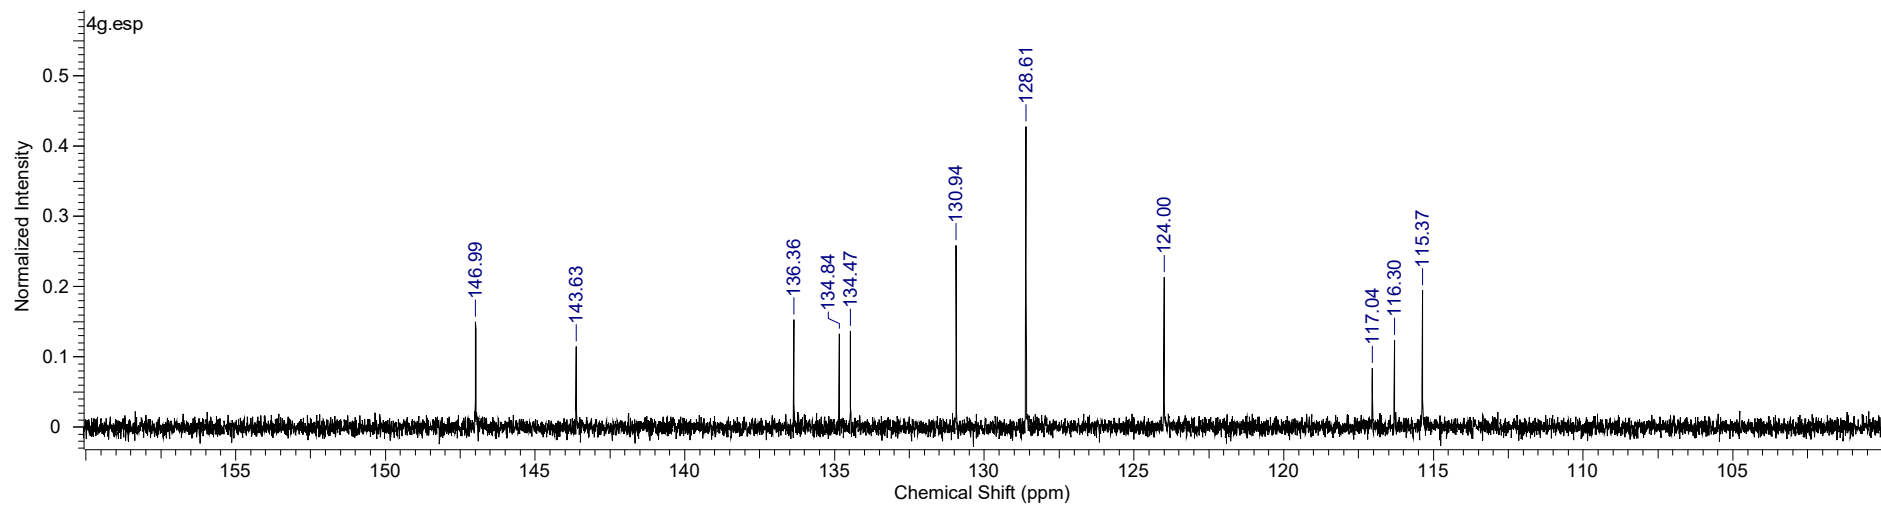



## 2-(5,6-dibromo-1*H*-benzimidazol-1-yl)-1-(2,4-difluorophenyl)ethanone (4h)

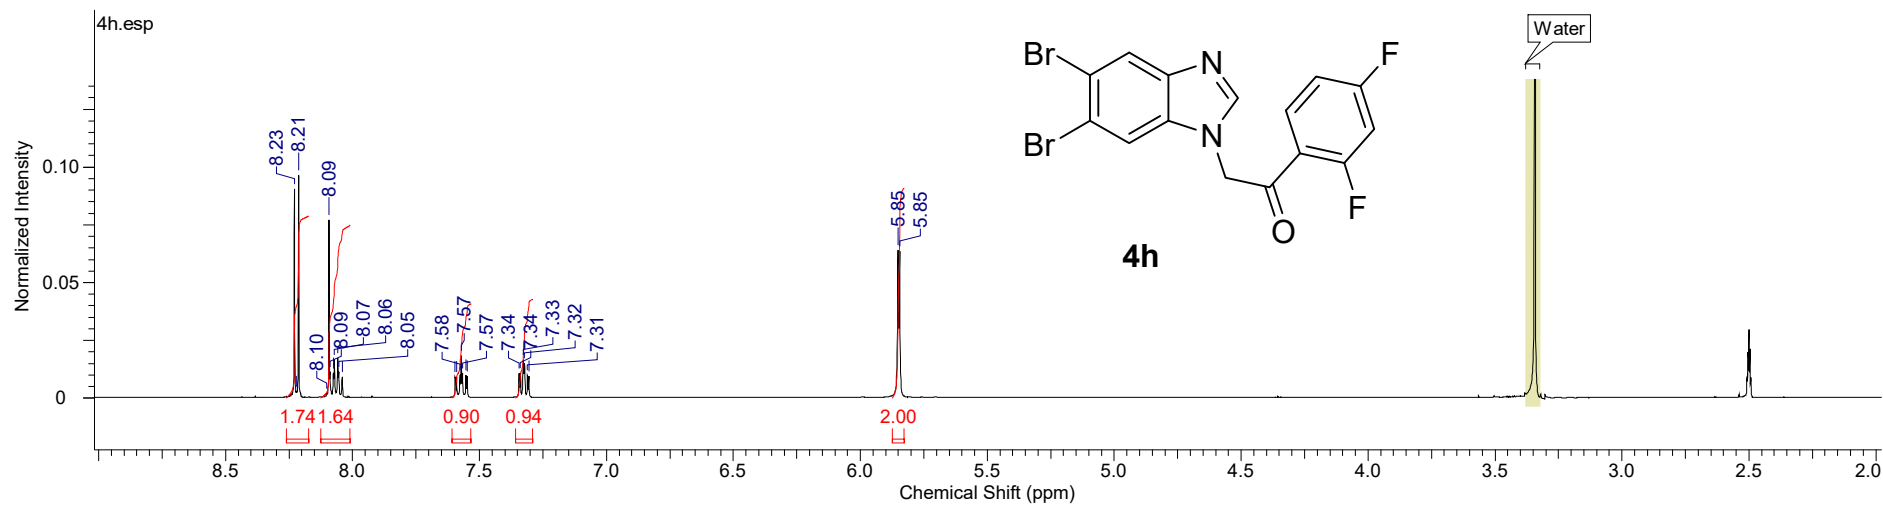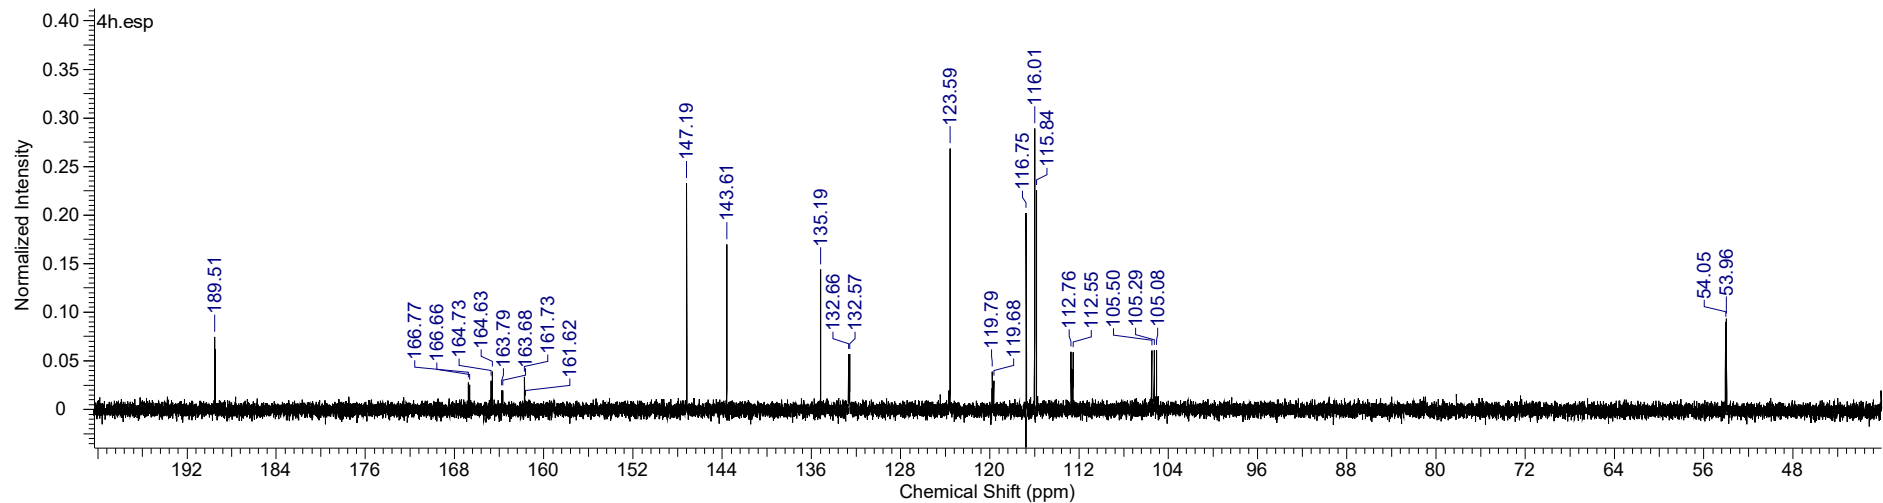

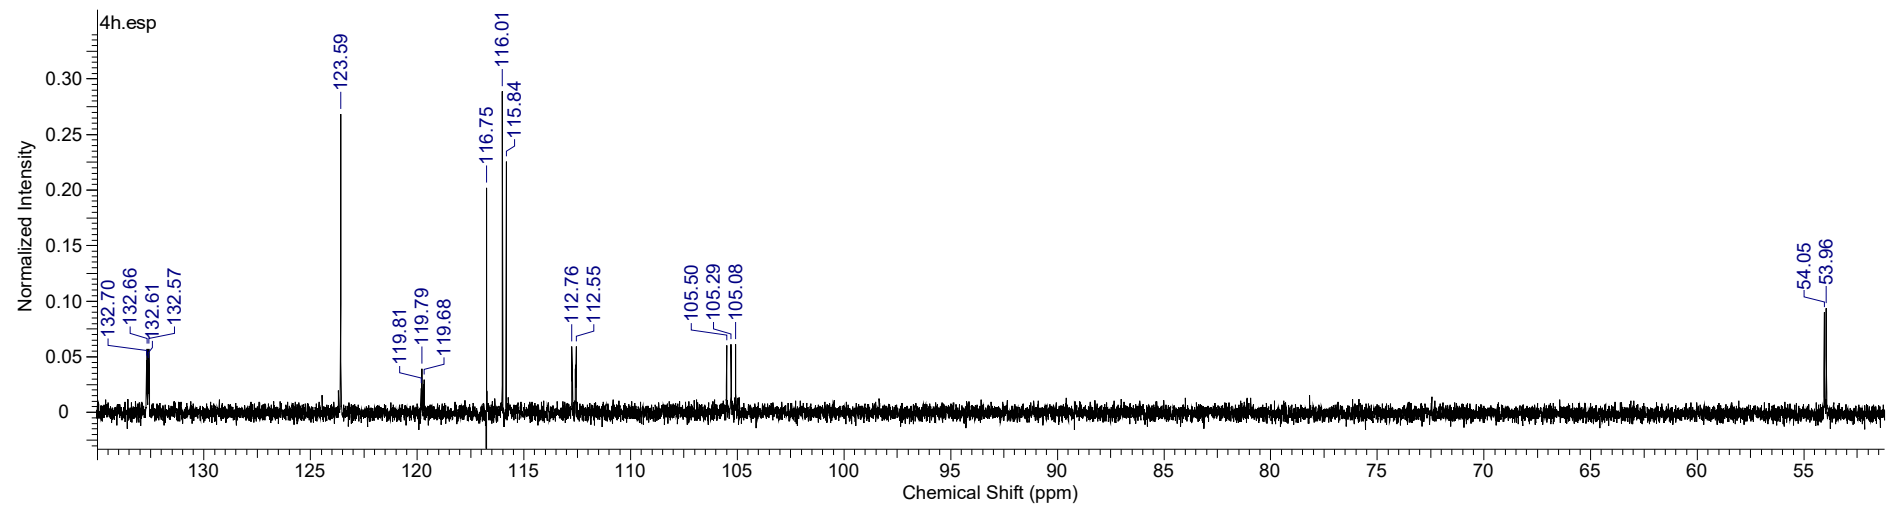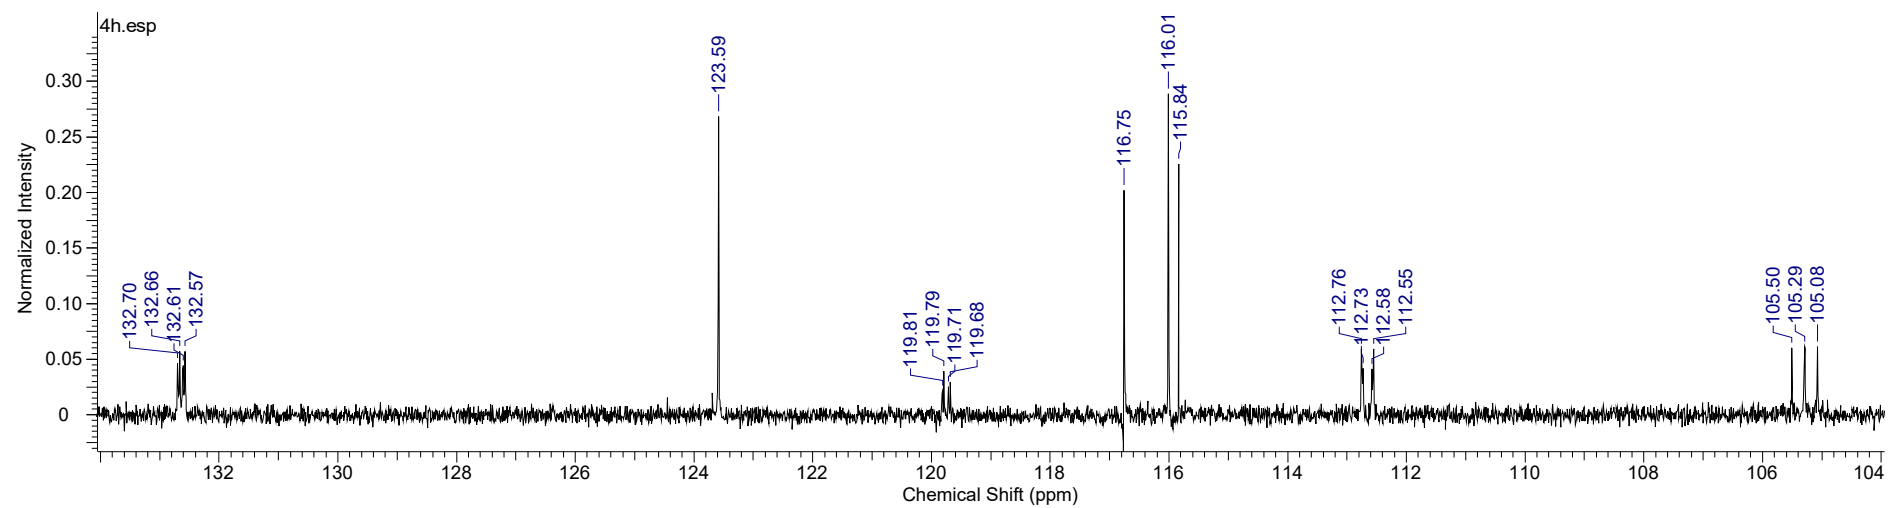

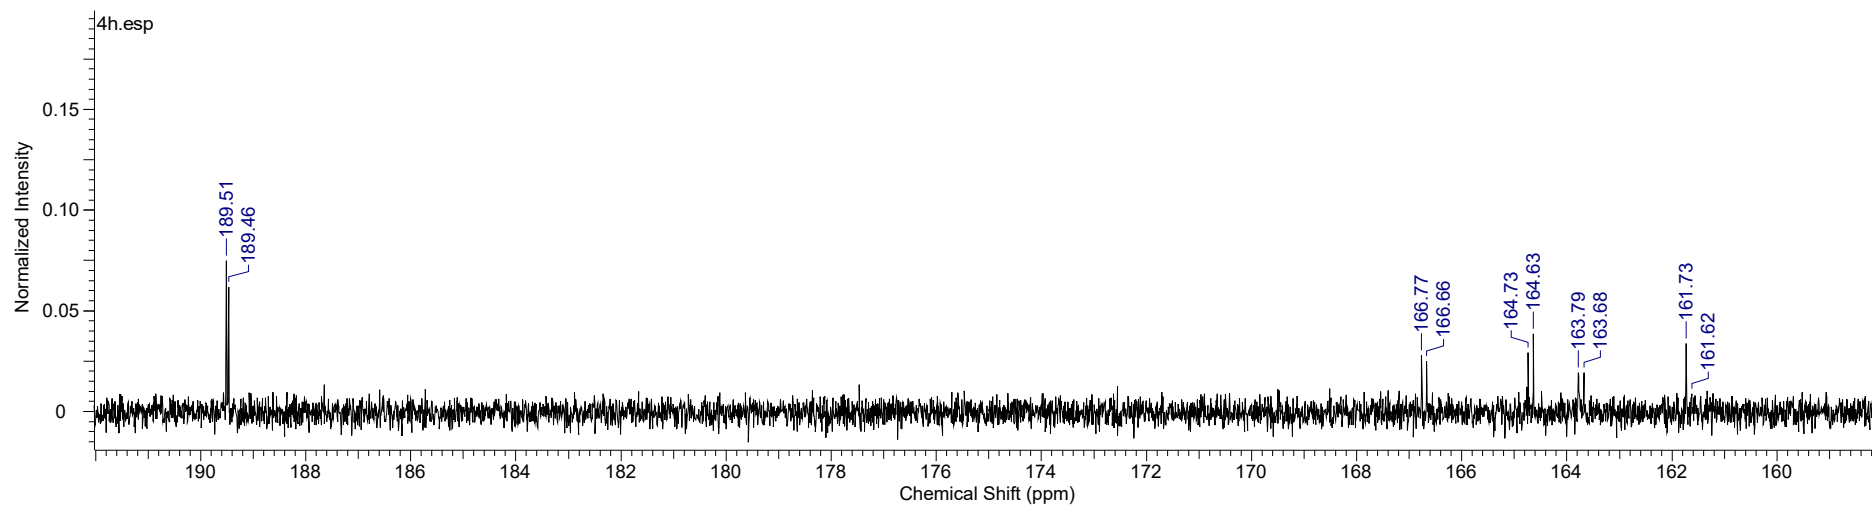

**2-(5,6-dibromo-1*H*-benzimidazol-1-yl)-1-(2,5-difluorophenyl)ethanone (4i)**

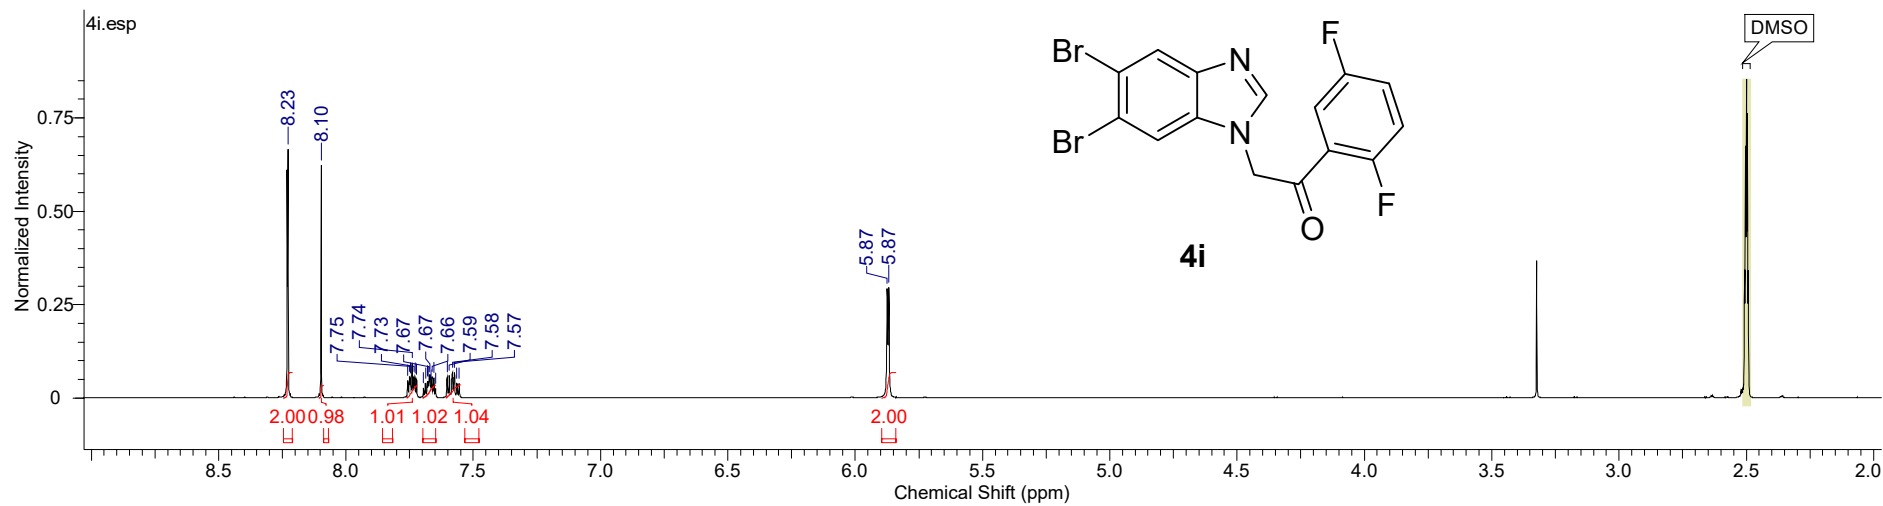

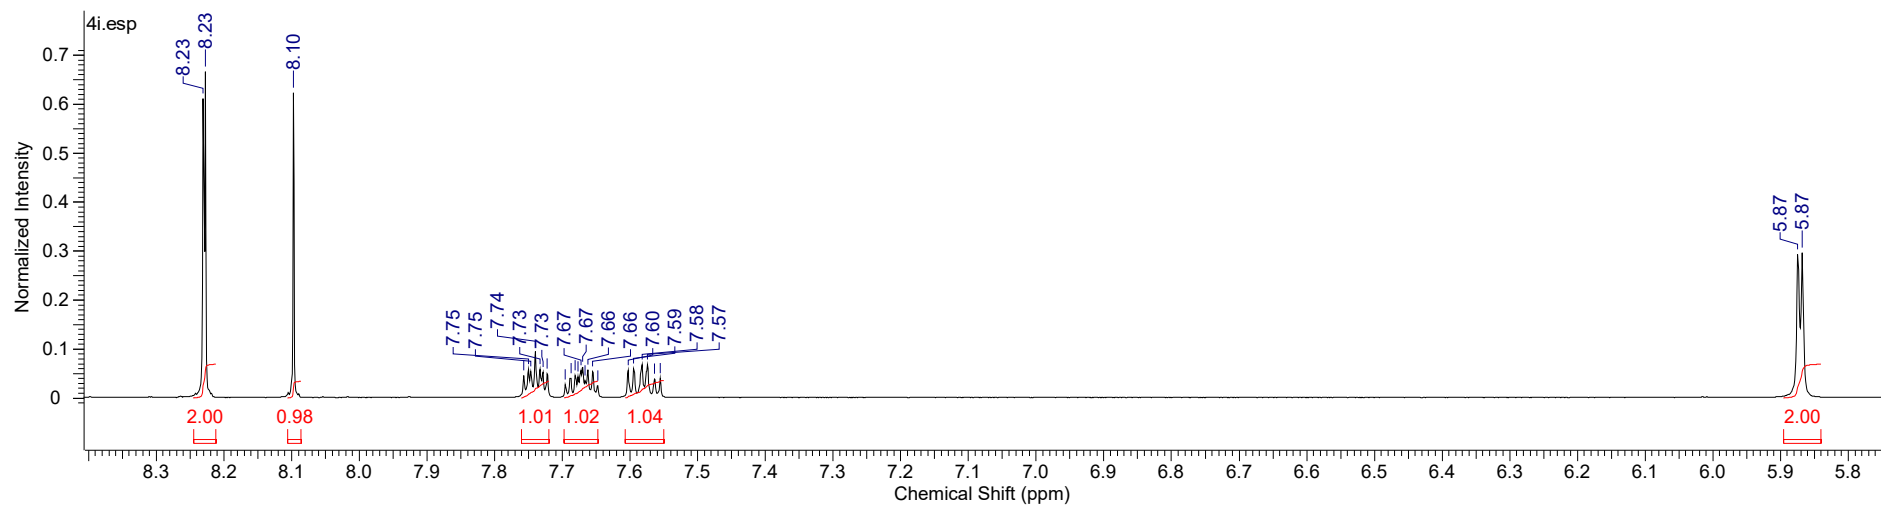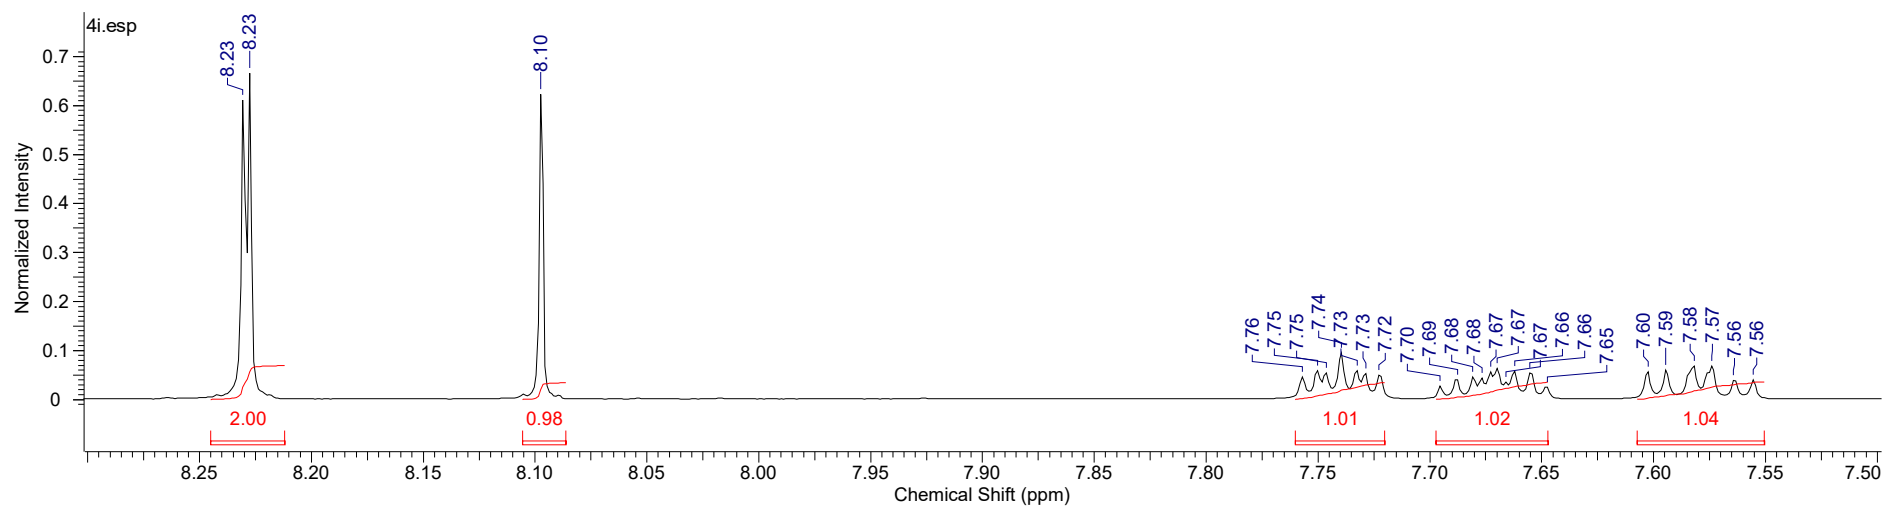

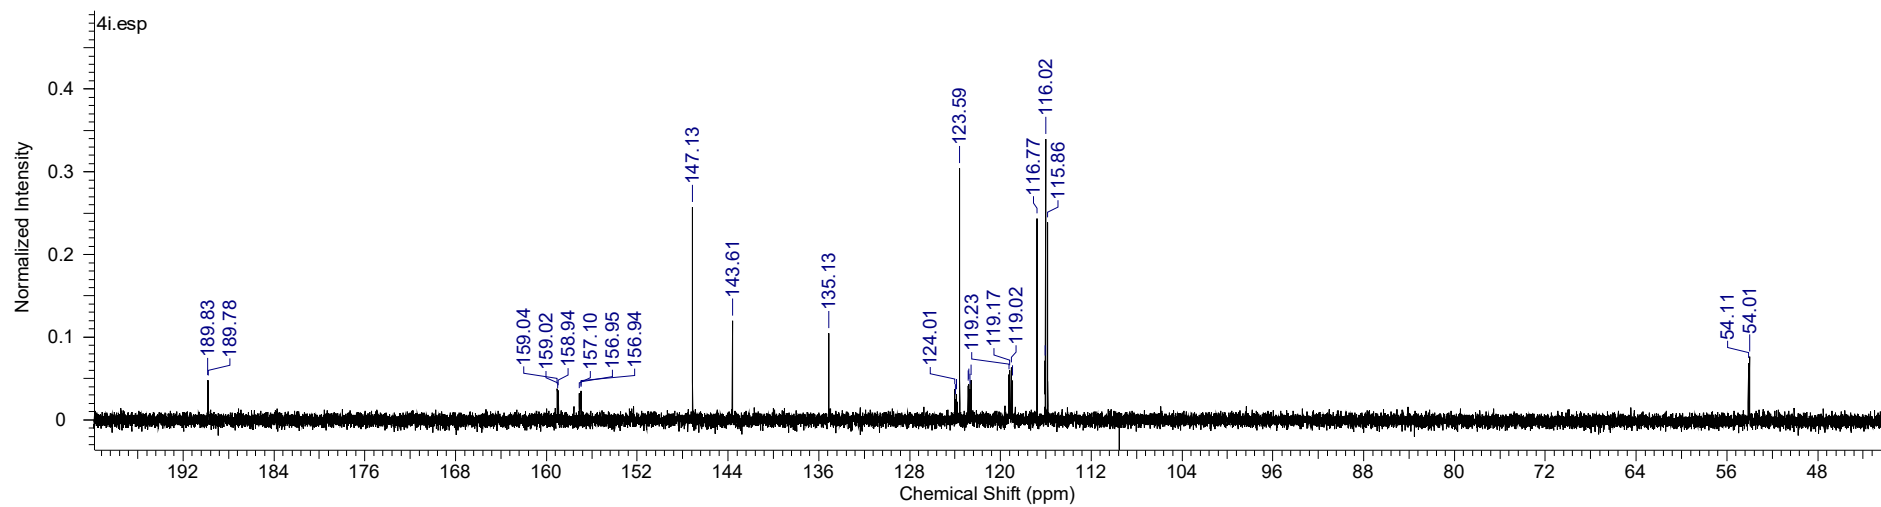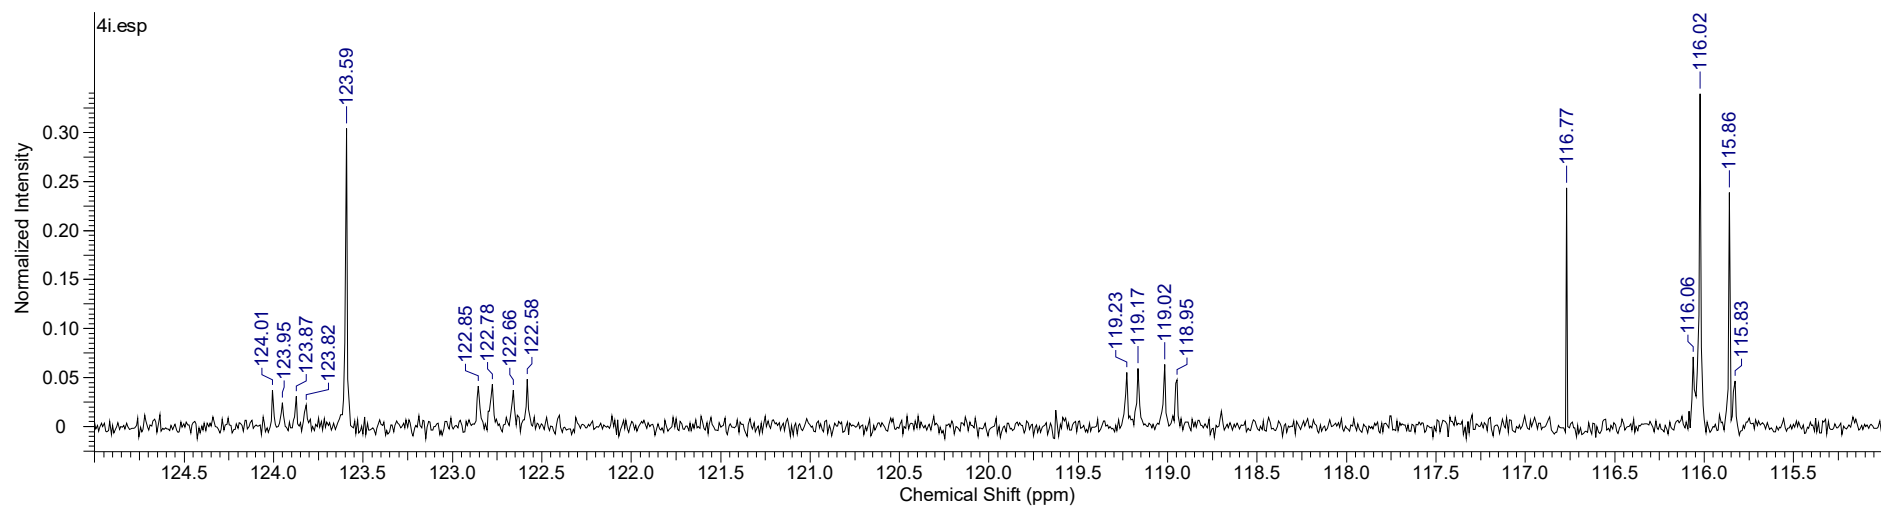

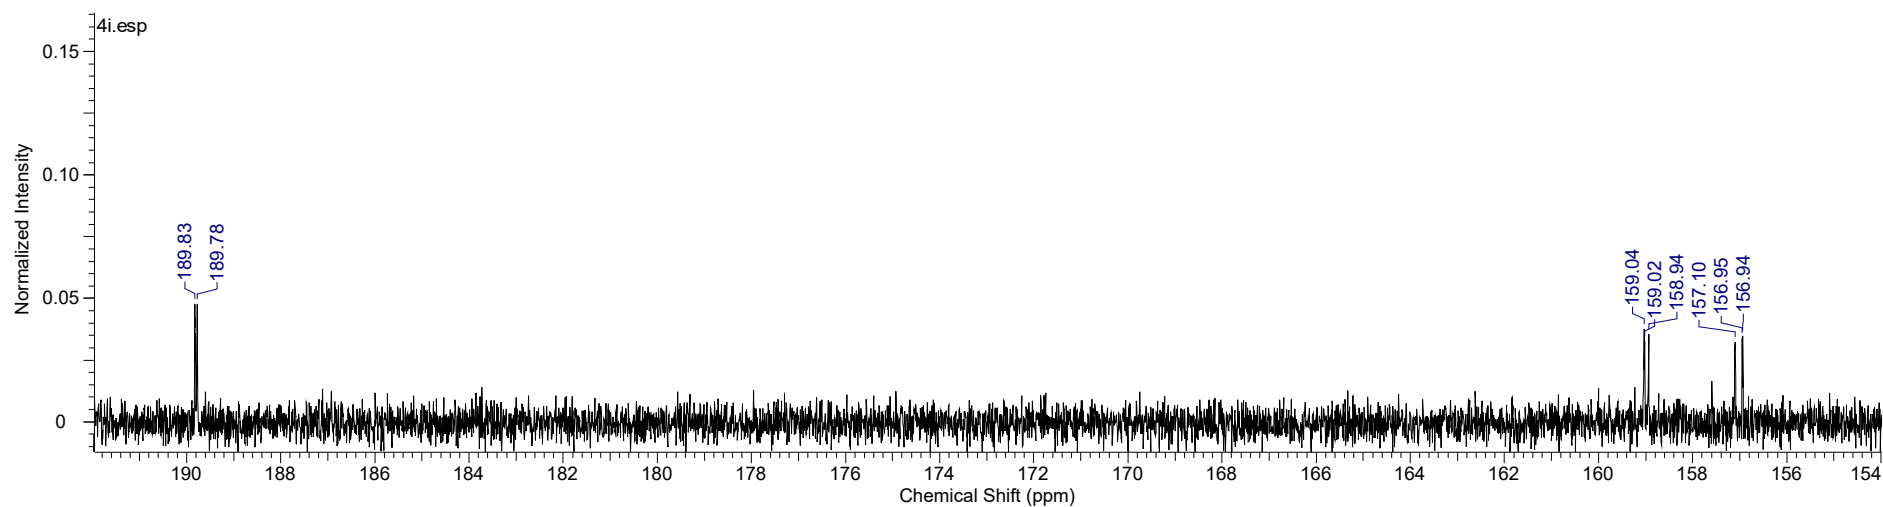

## 2-(4,6-dibromo-1*H*-benzimidazol-1-yl)-1-phenylethanone (5a)

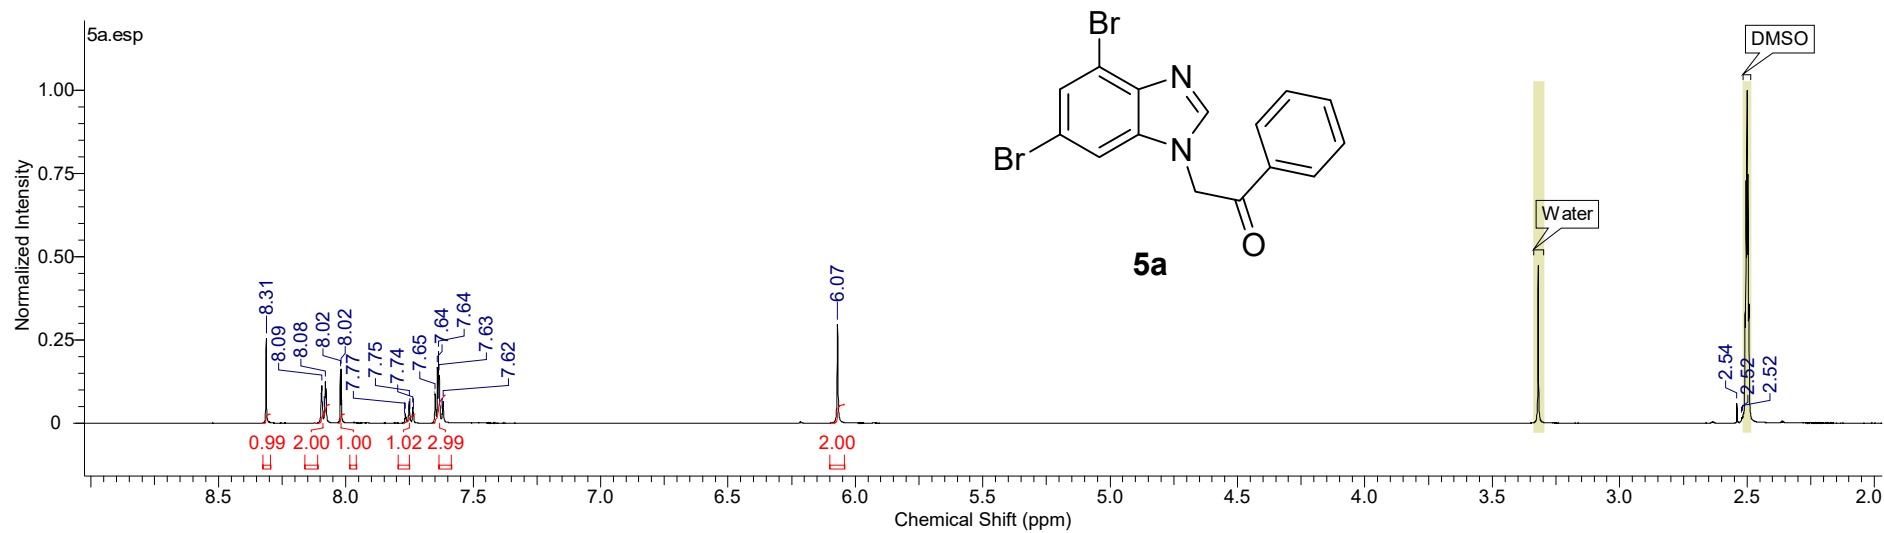

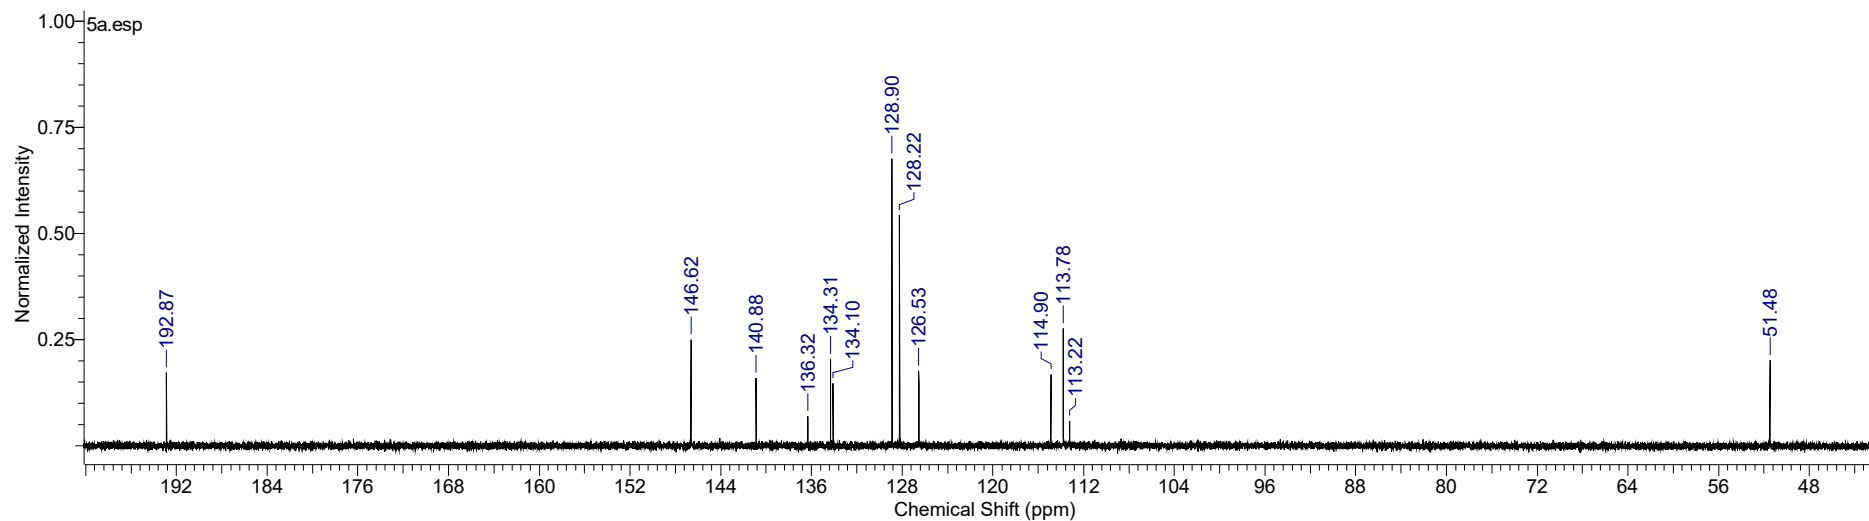

## 2-(4,6-dibromo-1*H*-benzimidazol-1-yl)-1-(4-chlorophenyl)ethanone (5c)

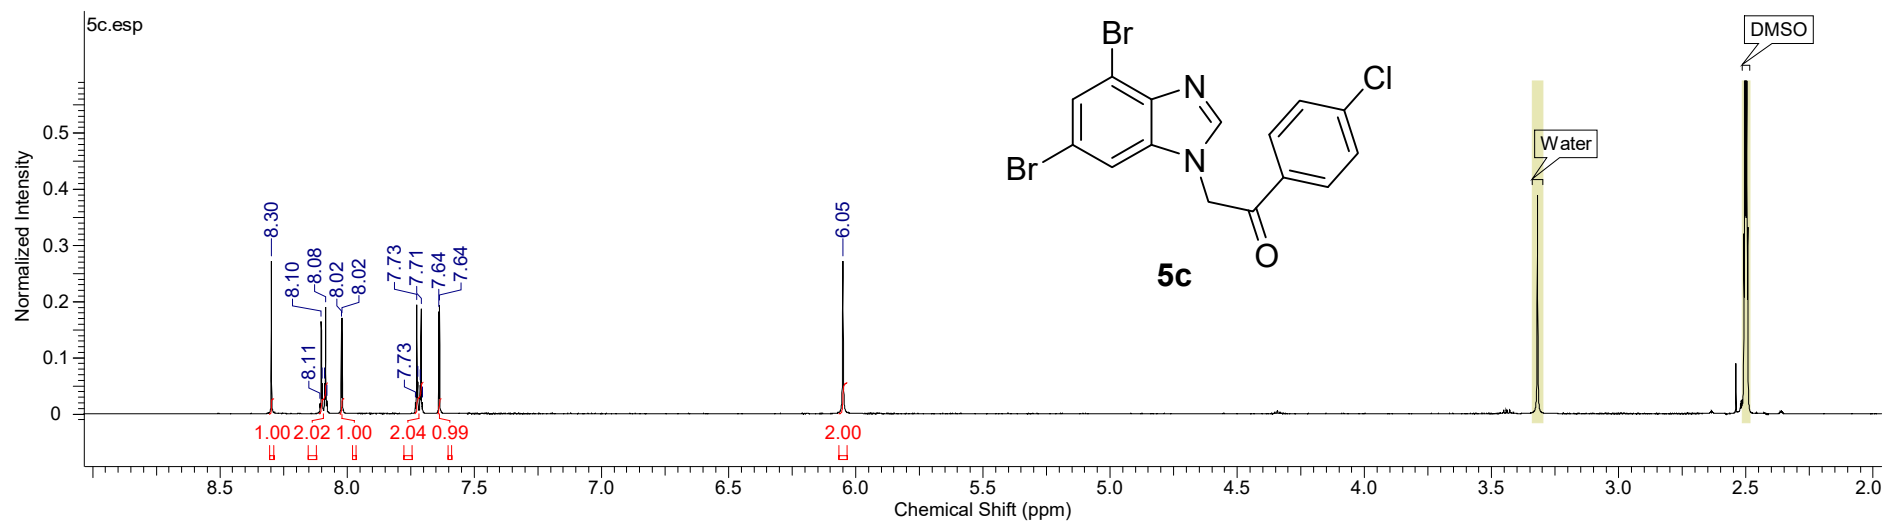

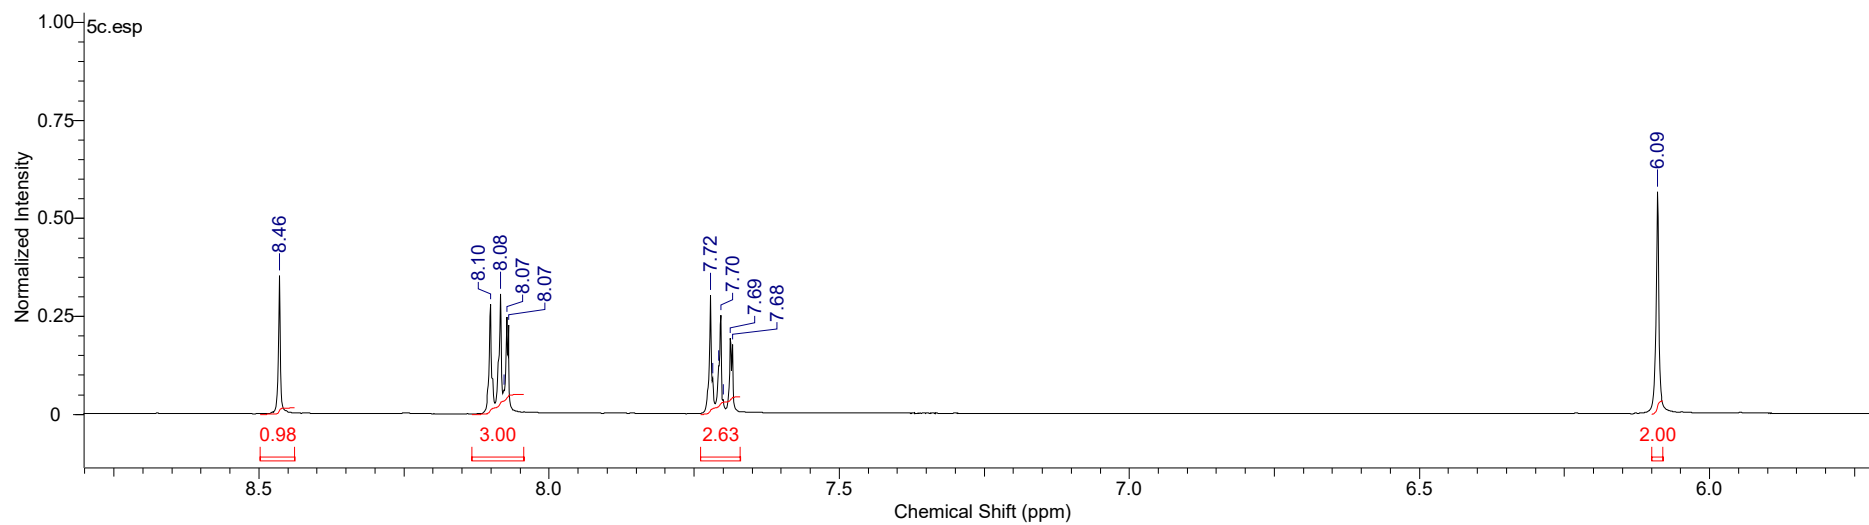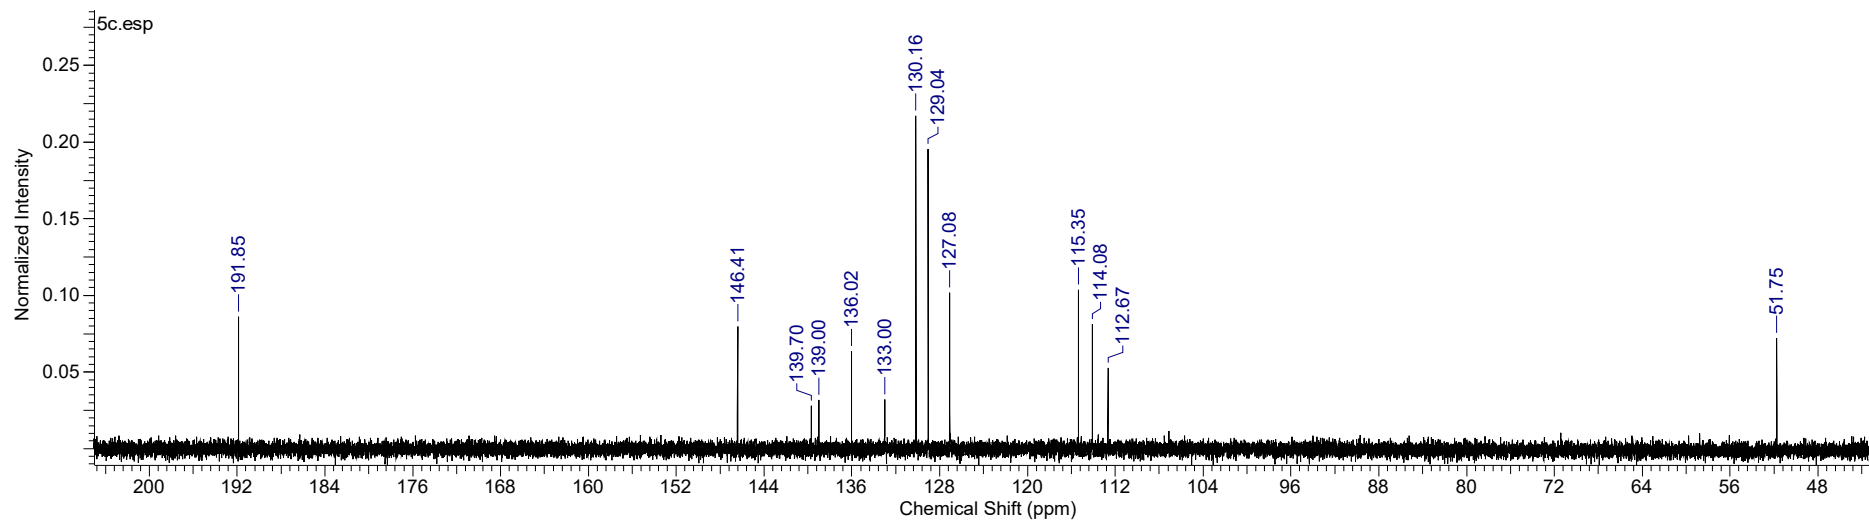



**2-(4,6-dibromo-1*H*-benzimidazol-1-yl)-1-(2,4,6-trichlorophenyl)ethanone (5g)**

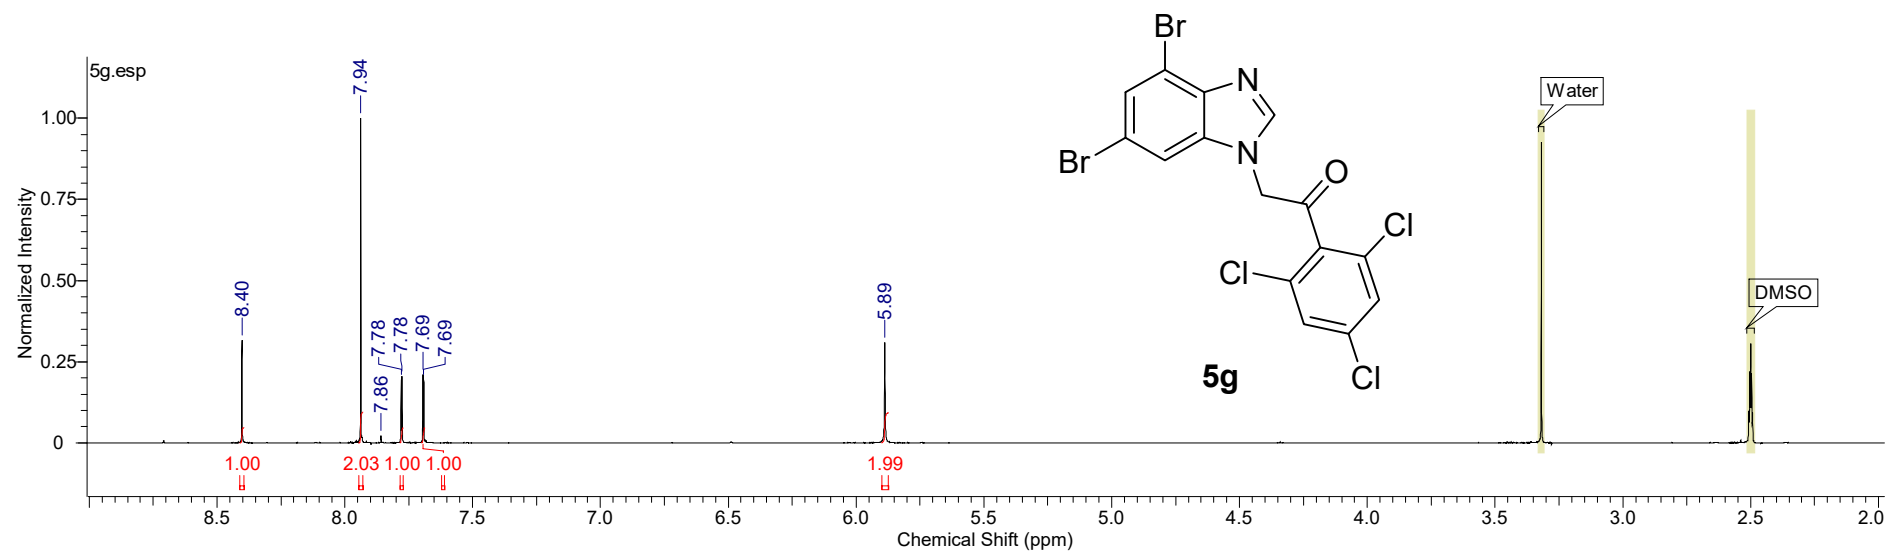

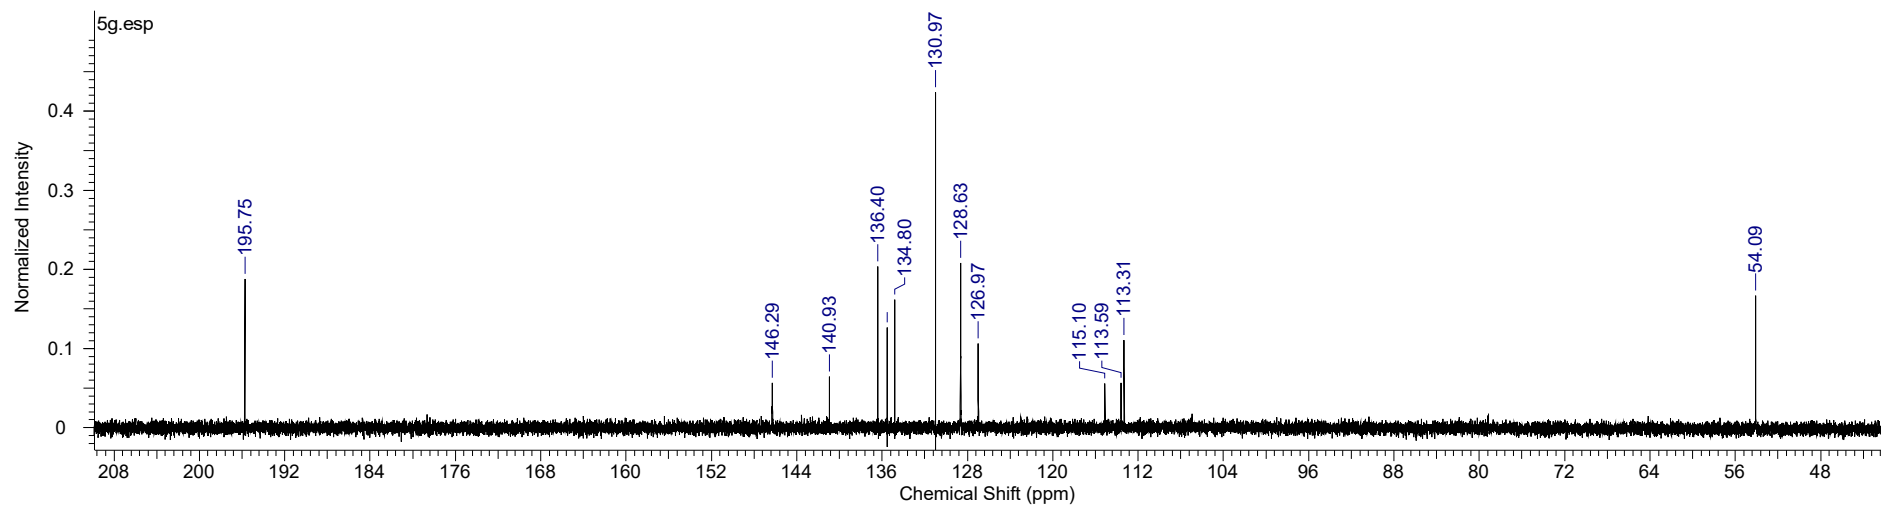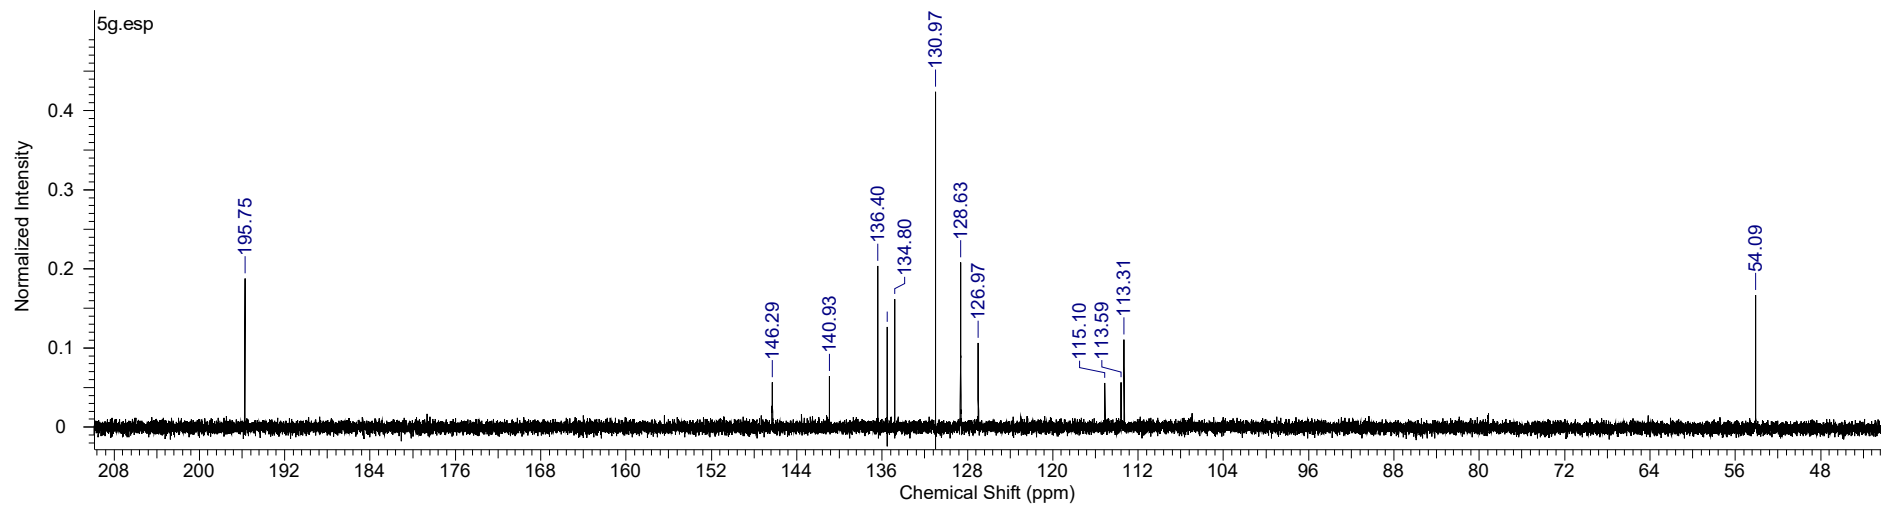

**2-(4,6-dibromo-1*H*-benzimidazol-1-yl)-1-(2,5-difluorophenyl)ethanone (5i)**

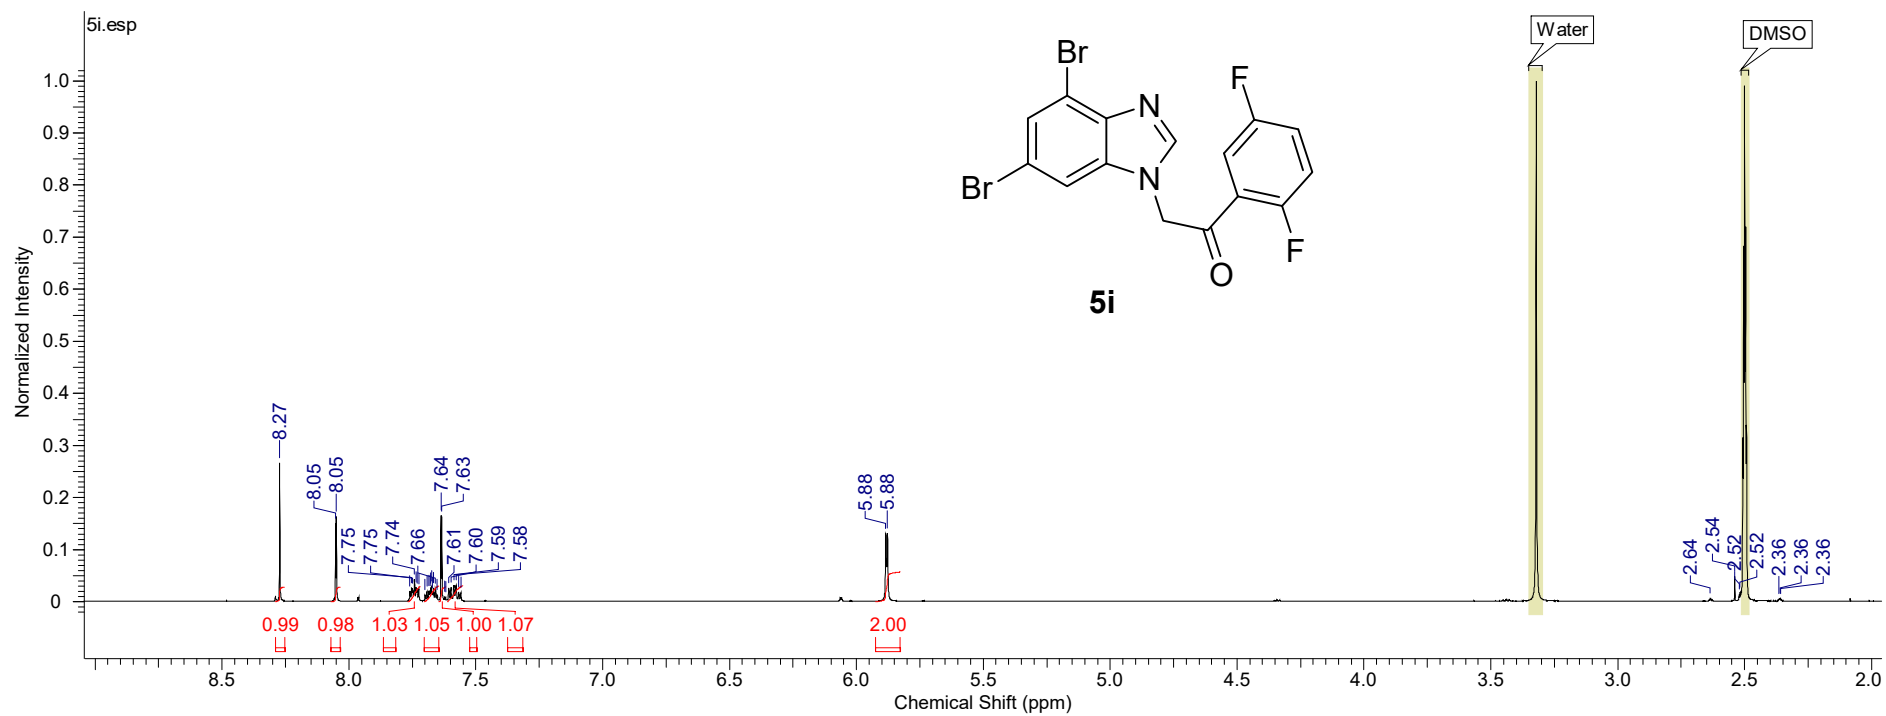

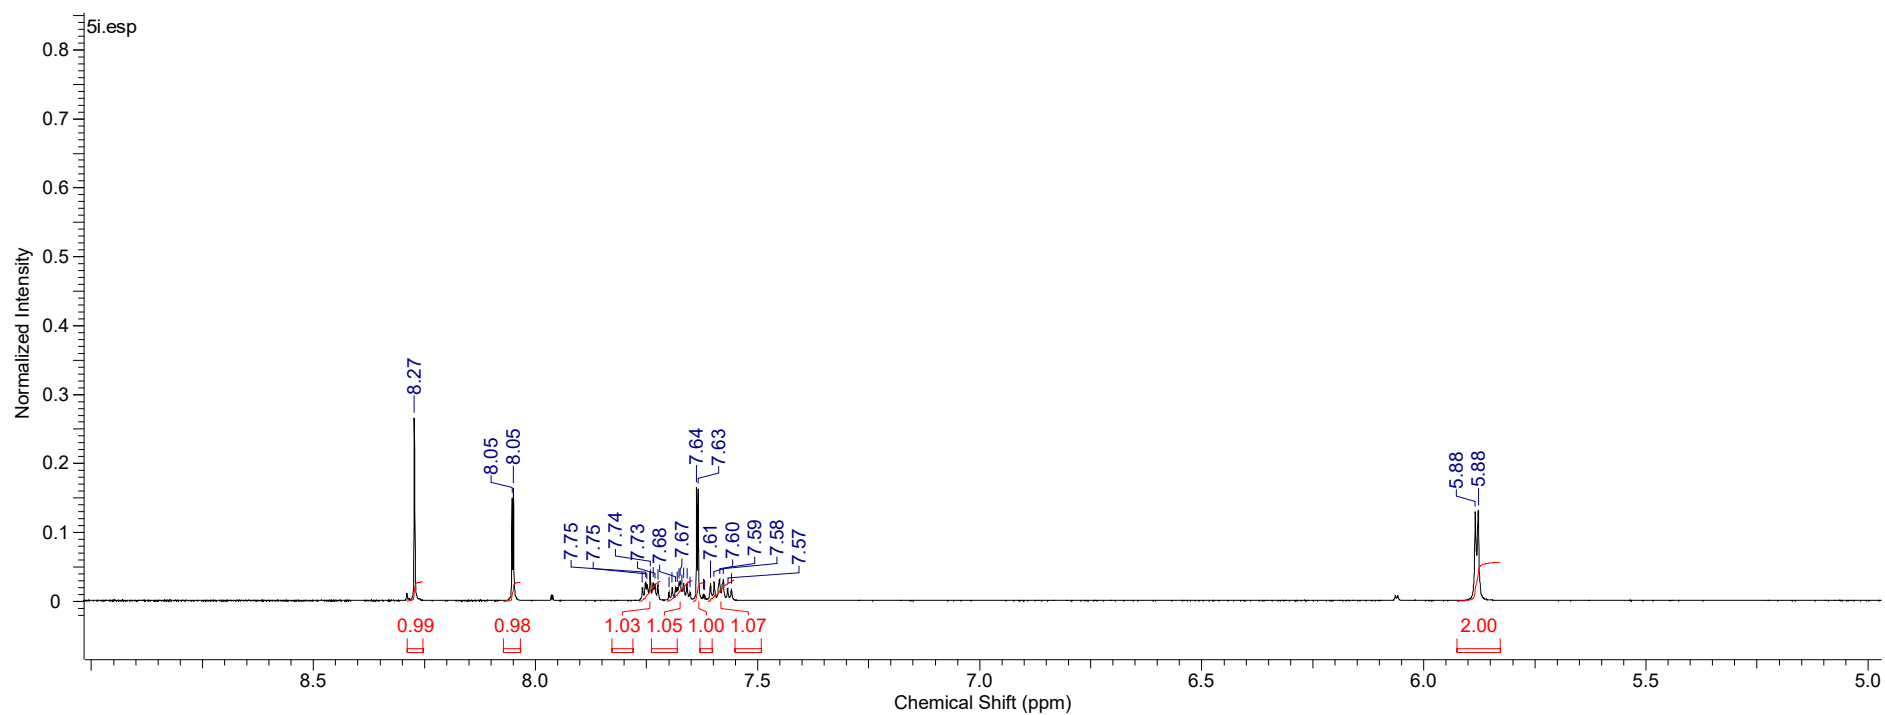

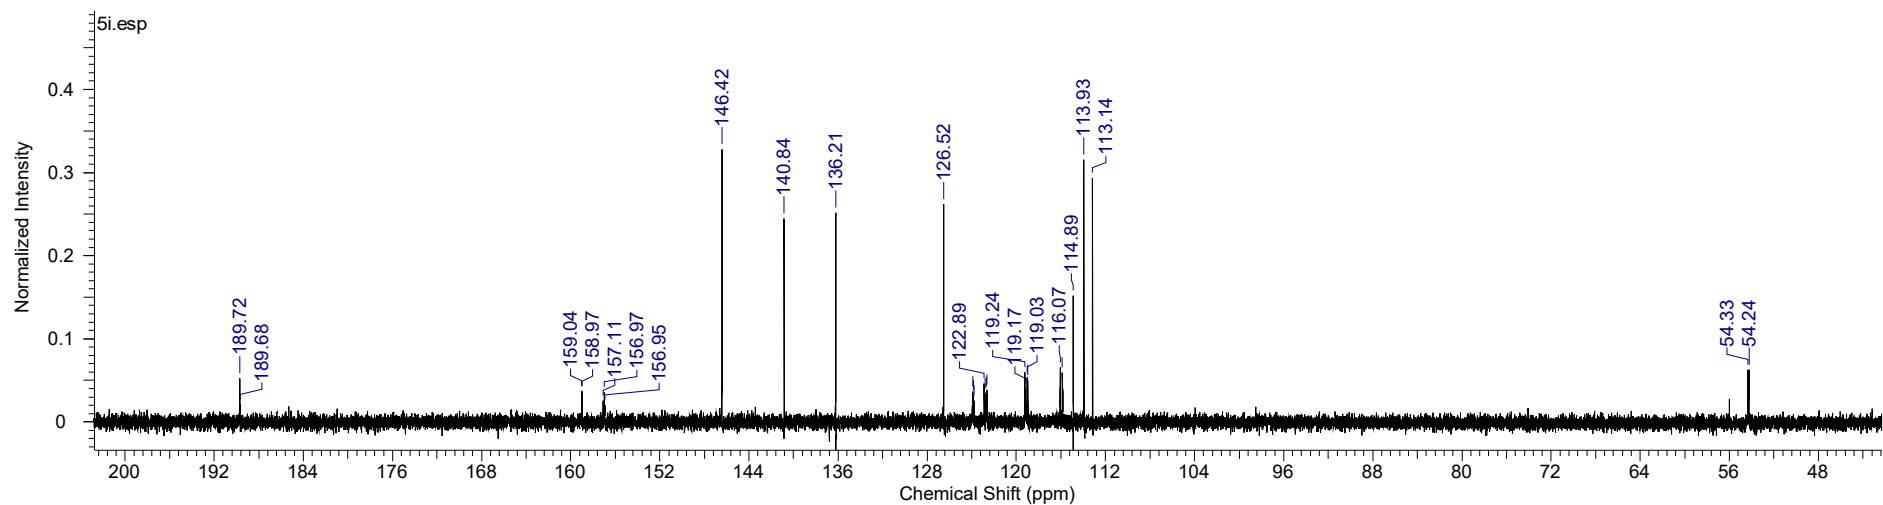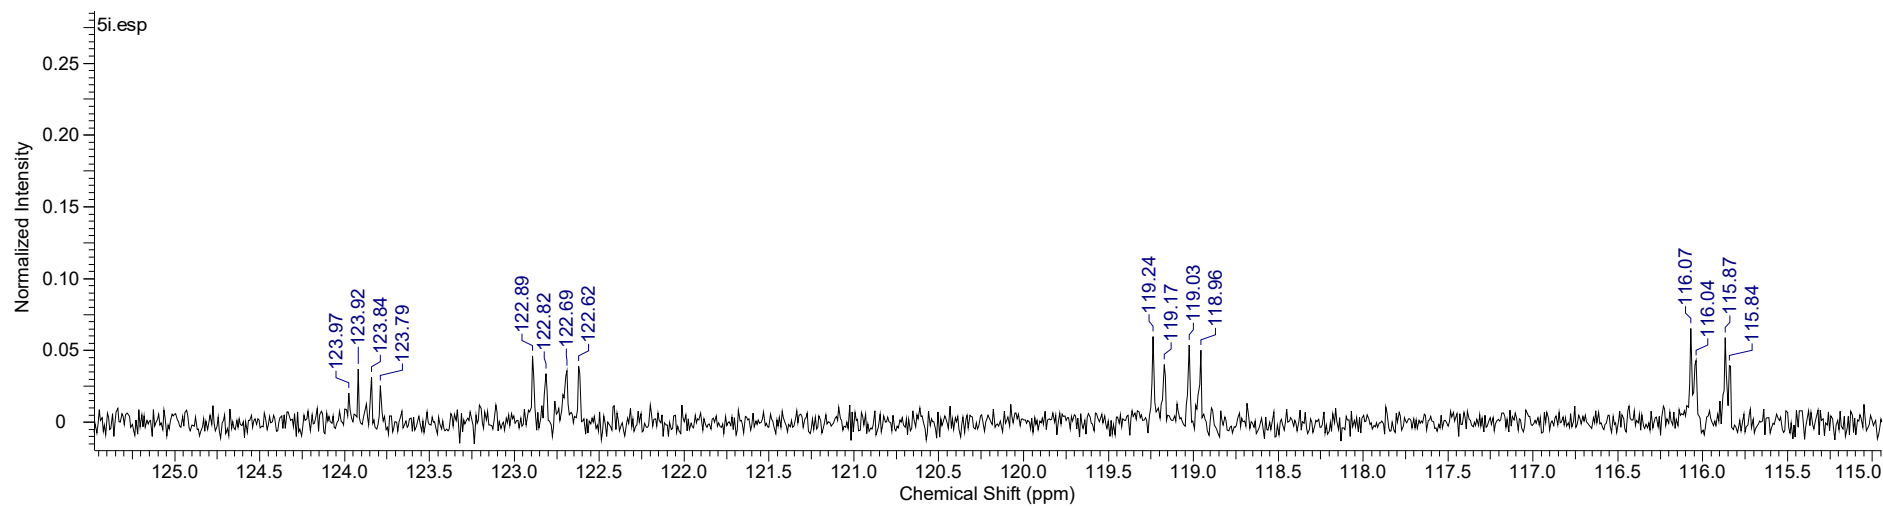

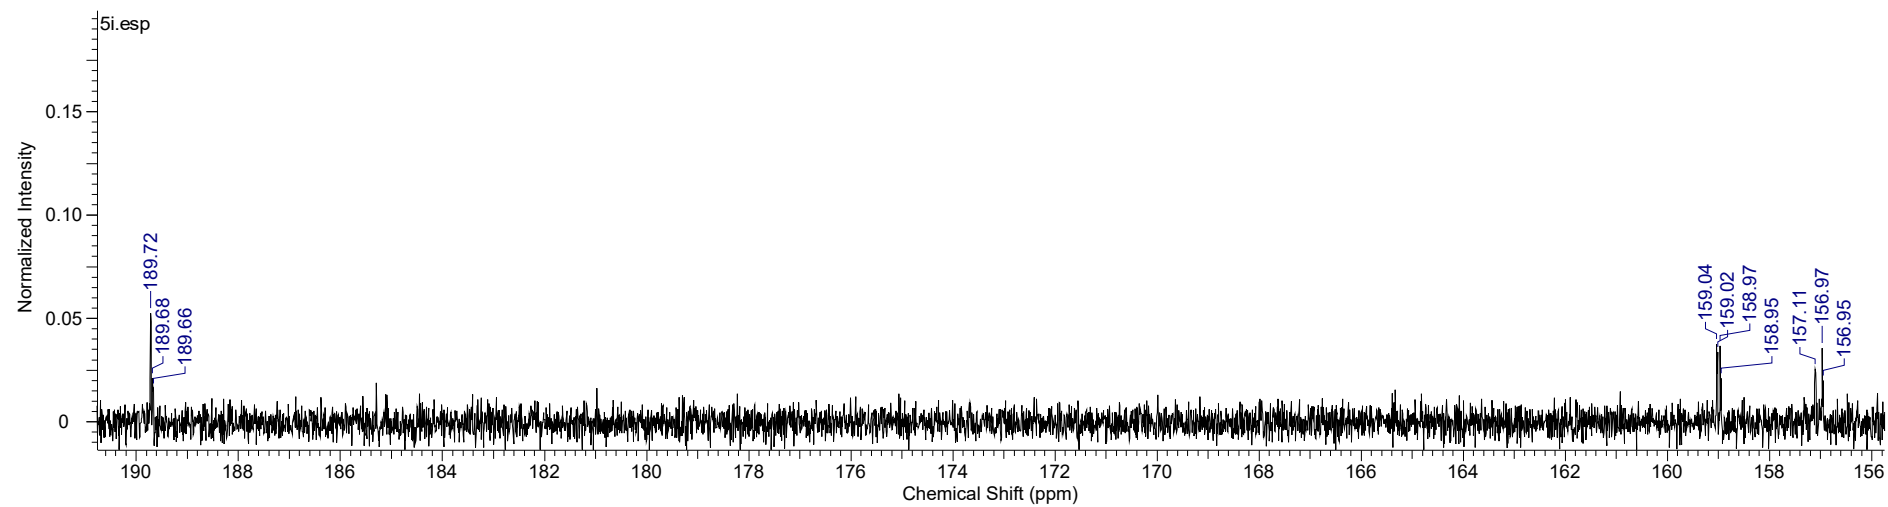

#### 4. HRMS of compounds 4 and 5

##### 2-(5,6-dibromo-1H-benzimidazol-1-yl)-1-(4-chlorophenyl)ethanone (4c)

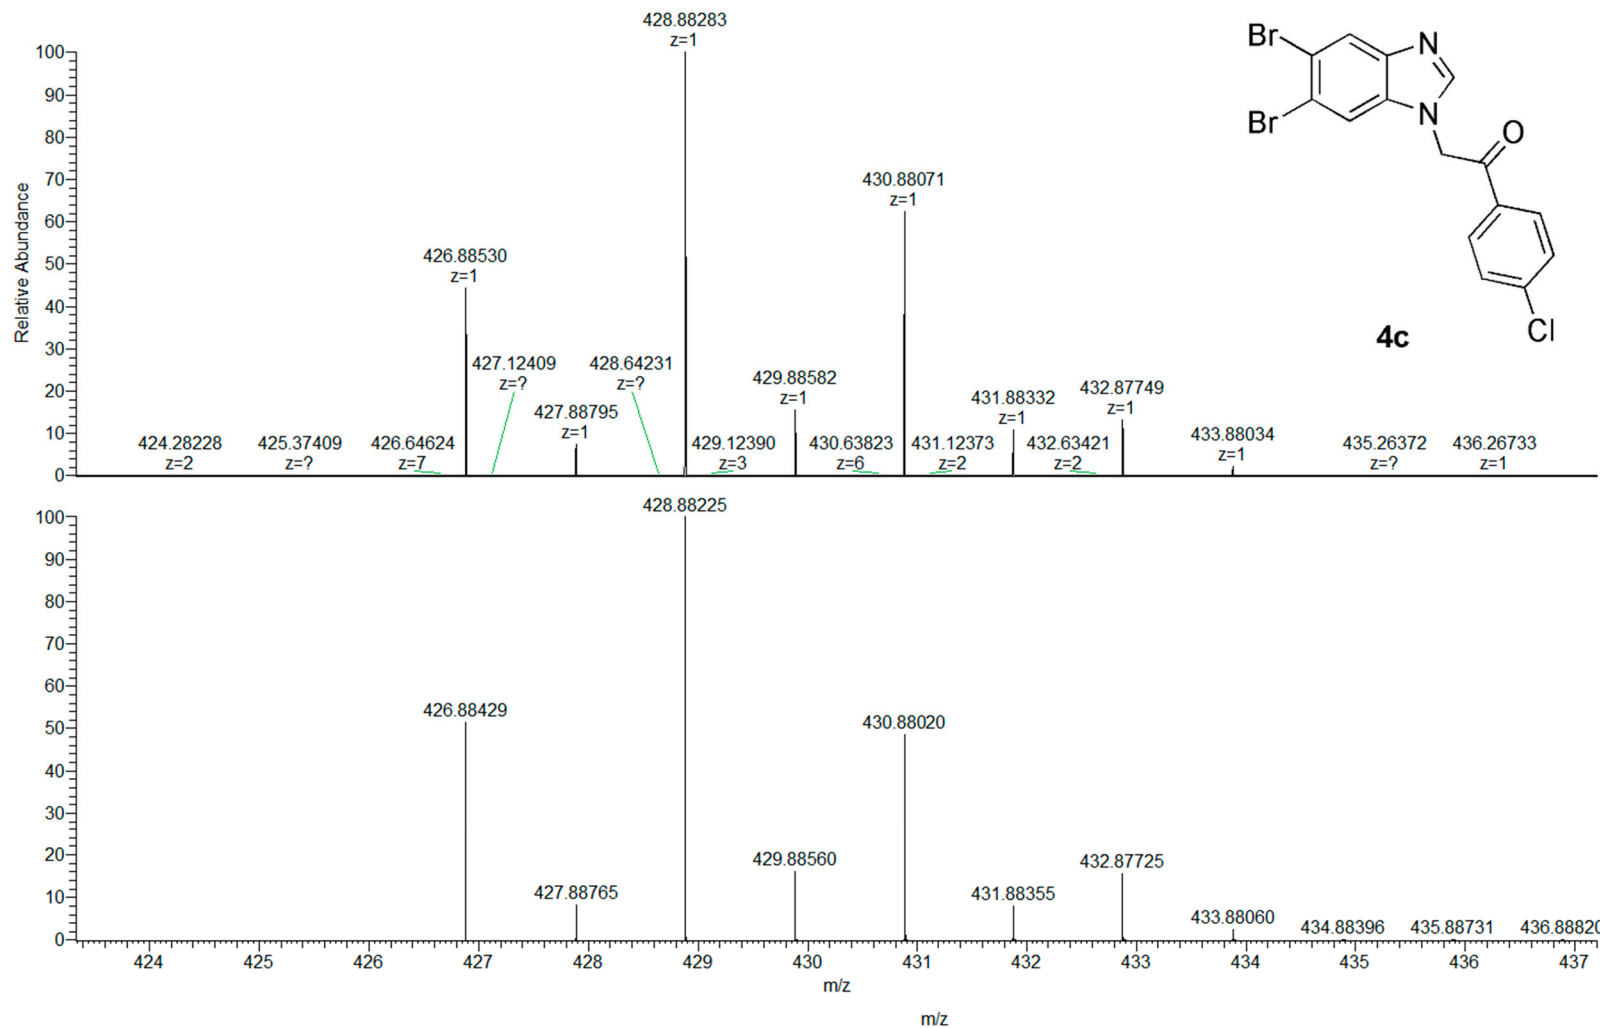

NL:  
2.50E8  
210526\_PB\_SYM\_4.Cl  
#465-540 RT: 4.41-5.12  
AV: 76 T: FTMS + p ESI  
Full ms  
[160.0000-2000.0000]

NL:  
3.19E5  
C<sub>15</sub>H<sub>9</sub>Br<sub>2</sub>ClN<sub>2</sub>O +H:  
C<sub>15</sub>H<sub>10</sub>Br<sub>2</sub>ClN<sub>2</sub>O<sub>1</sub>  
pa Chrg 1

## 2-(5,6-dibromo-1H-benzimidazol-1-yl)-1-(4-bromophenyl)ethanone (4d)

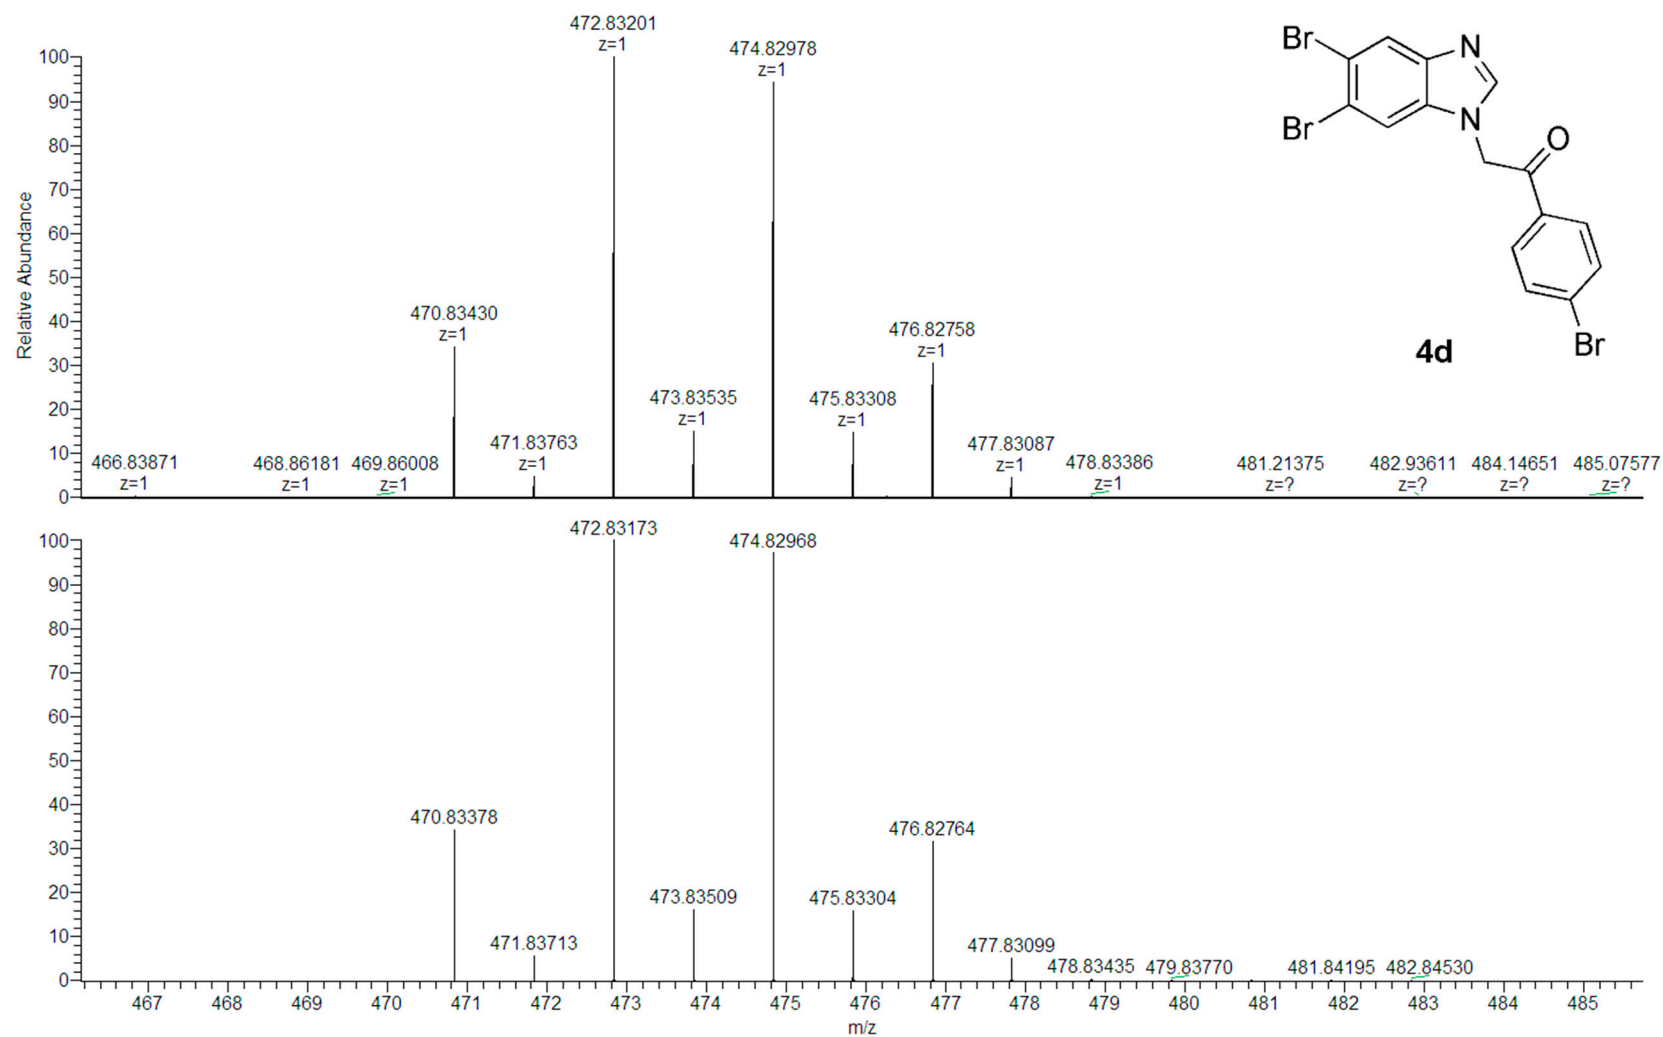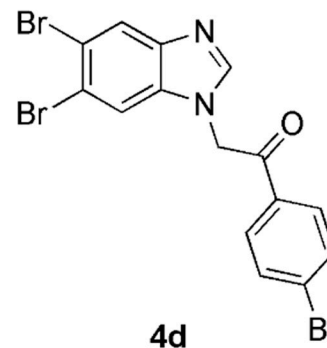

NL:  
1.41E8  
211025\_SYMETR\_4-  
Br#41-181 RT:  
0.36-1.58 AV: 141 T:  
FTMS + p ESI Full ms  
[100.0000-1500.0000]

NL:  
3.20E5  
C<sub>15</sub>H<sub>9</sub>Br<sub>3</sub>N<sub>2</sub>O +H:  
C<sub>15</sub>H<sub>10</sub>Br<sub>3</sub>N<sub>2</sub>O<sub>1</sub>  
pa Chrg 1



## 2-(5,6-dibromo-1H-benzimidazol-1-yl)-1-(2,4-dichlorophenyl)ethanone (4e)

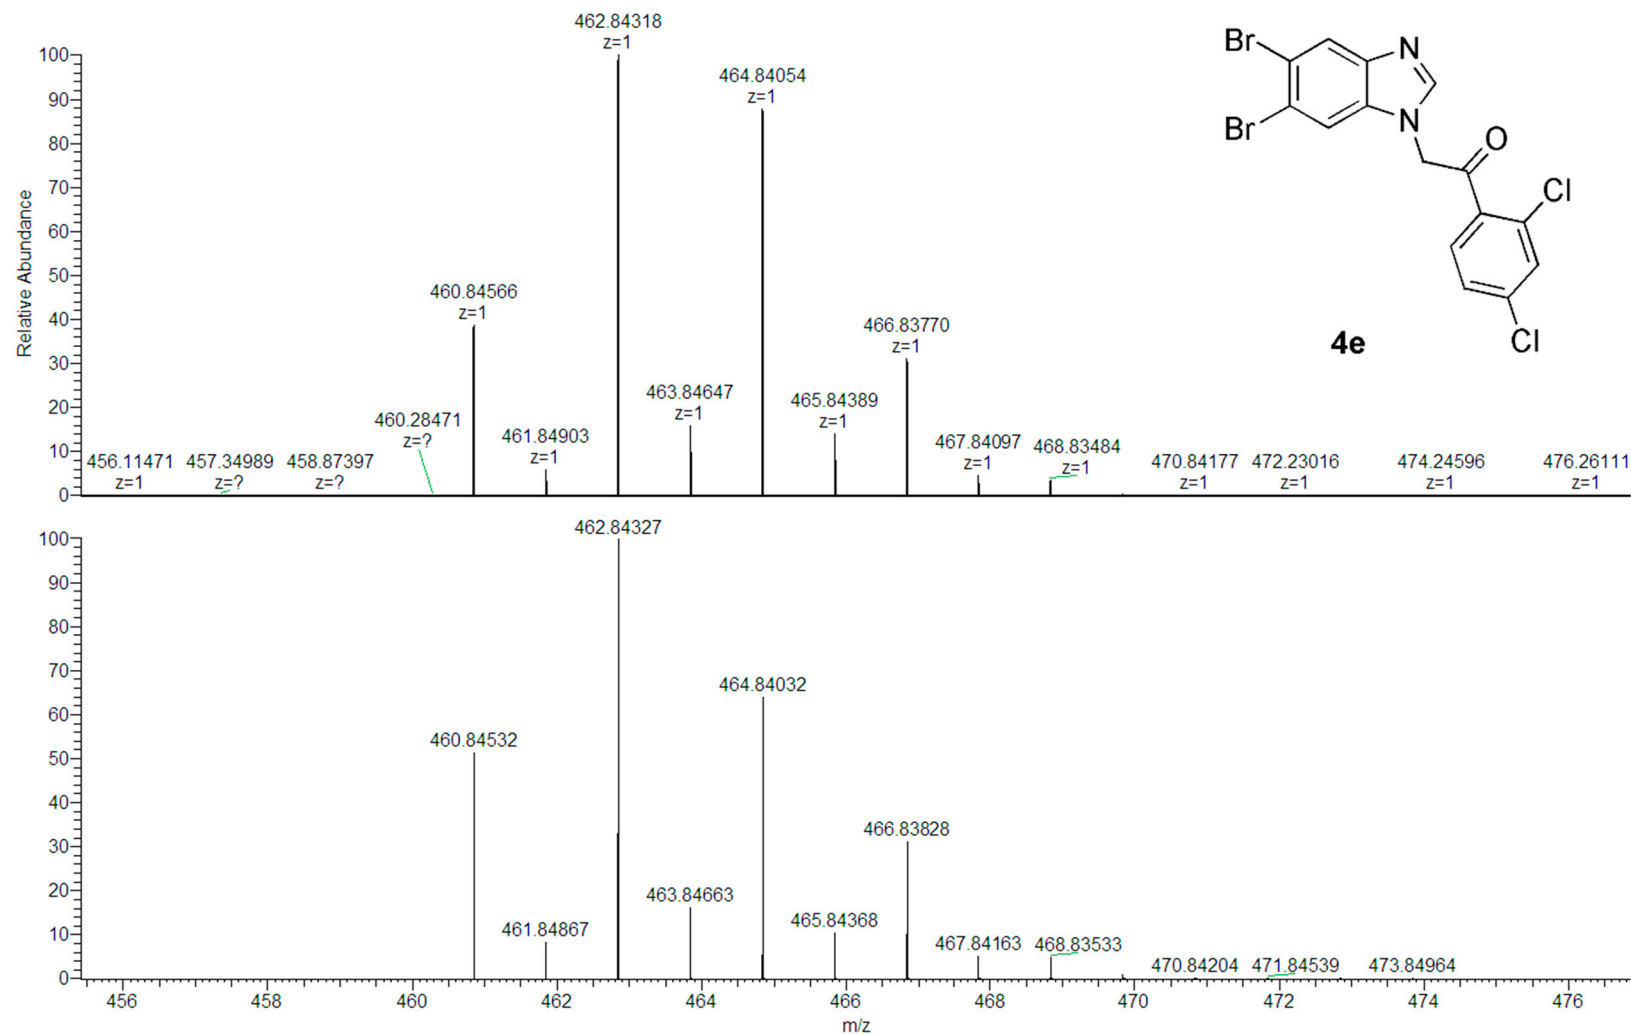

NL:  
8.30E8  
211025\_SYMETR\_2-4-  
Cl#75-156 RT: 0.65-1.36  
AV: 82 T: FTMS + p ESI  
Full ms  
[100.0000-1500.0000]

NL:  
2.42E5  
C<sub>15</sub>H<sub>8</sub>Br<sub>2</sub>Cl<sub>2</sub>N<sub>2</sub>O +H:  
C<sub>15</sub>H<sub>9</sub>Br<sub>2</sub>Cl<sub>2</sub>N<sub>2</sub>O<sub>1</sub>  
pa Chrg 1

# 2-(5,6-dibromo-1H-benzimidazol-1-yl)-1-(3,4-dichlorophenyl)ethanone (4f)

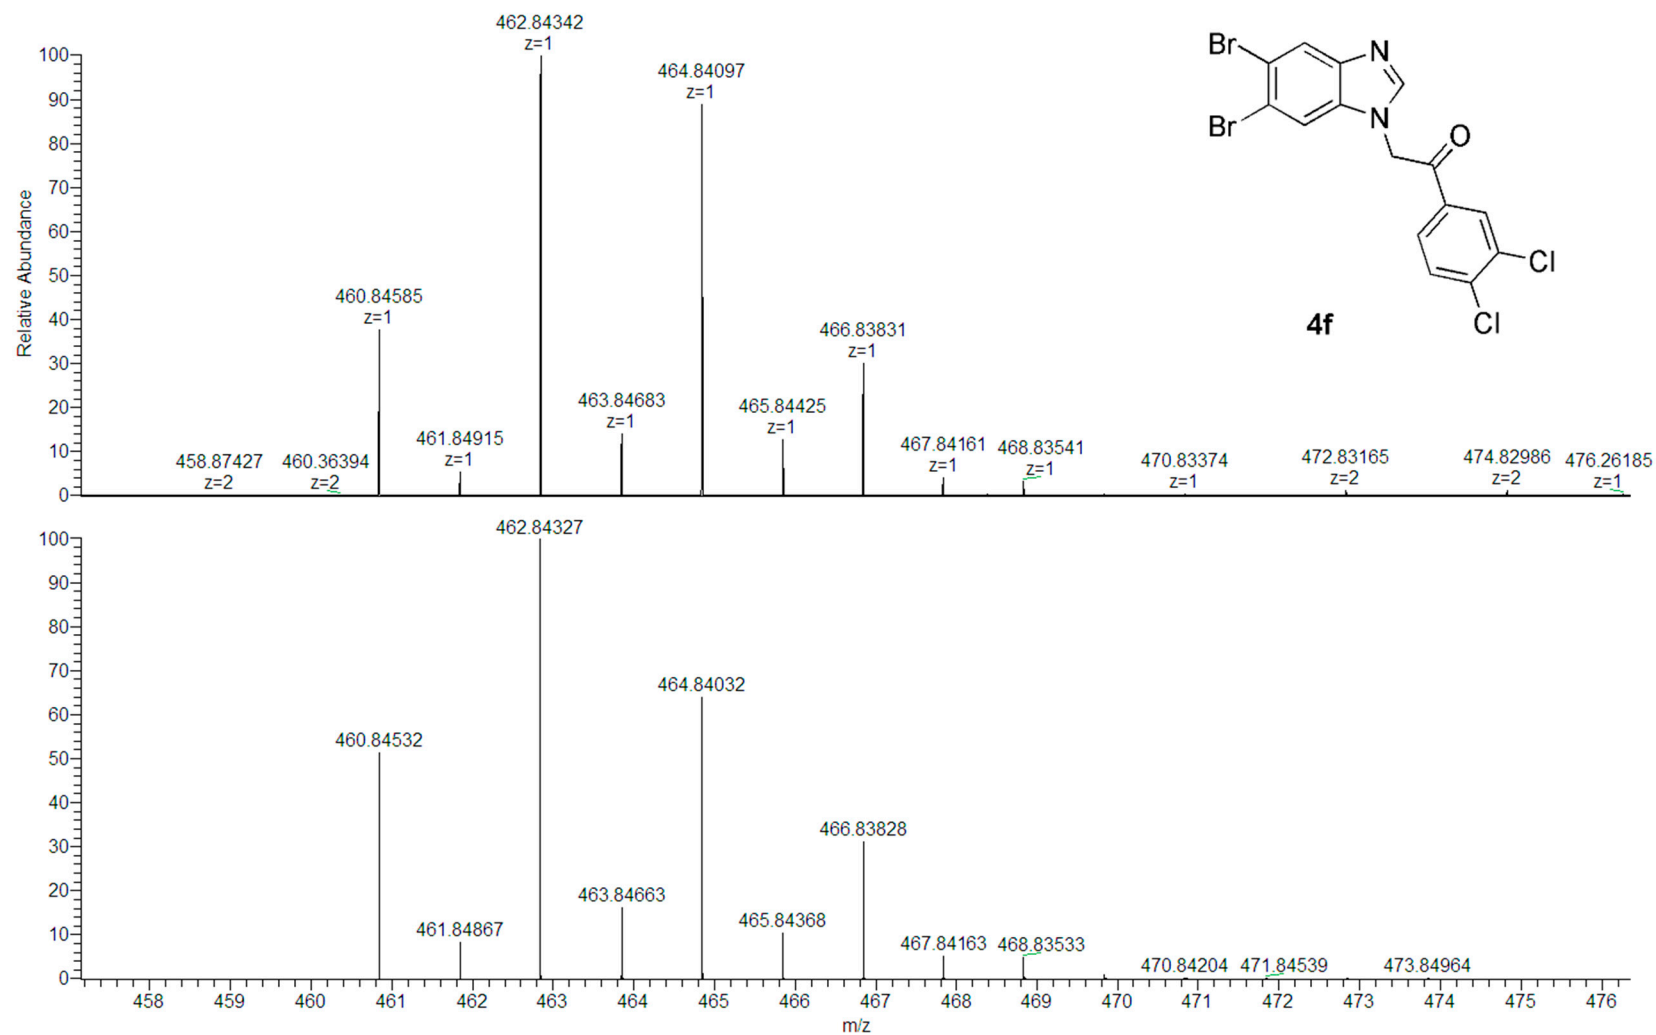

NL:  
5.27E7  
211025\_SYMETR\_2-  
5\_Br#122-211 RT:  
1.06-1.84 AV: 90 T:  
FTMS + p ESI Full ms  
[100.0000-1500.0000]

NL:  
2.42E5  
C<sub>15</sub>H<sub>8</sub>Br<sub>2</sub>Cl<sub>2</sub>N<sub>2</sub>O +H:  
C<sub>15</sub>H<sub>9</sub>Br<sub>2</sub>Cl<sub>2</sub>N<sub>2</sub>O<sub>1</sub>  
pa Chrg 1

# 2-(5,6-dibromo-1H-benzimidazol-1-yl)-1-(2,4,6-trichlorophenyl)ethanone (4g)

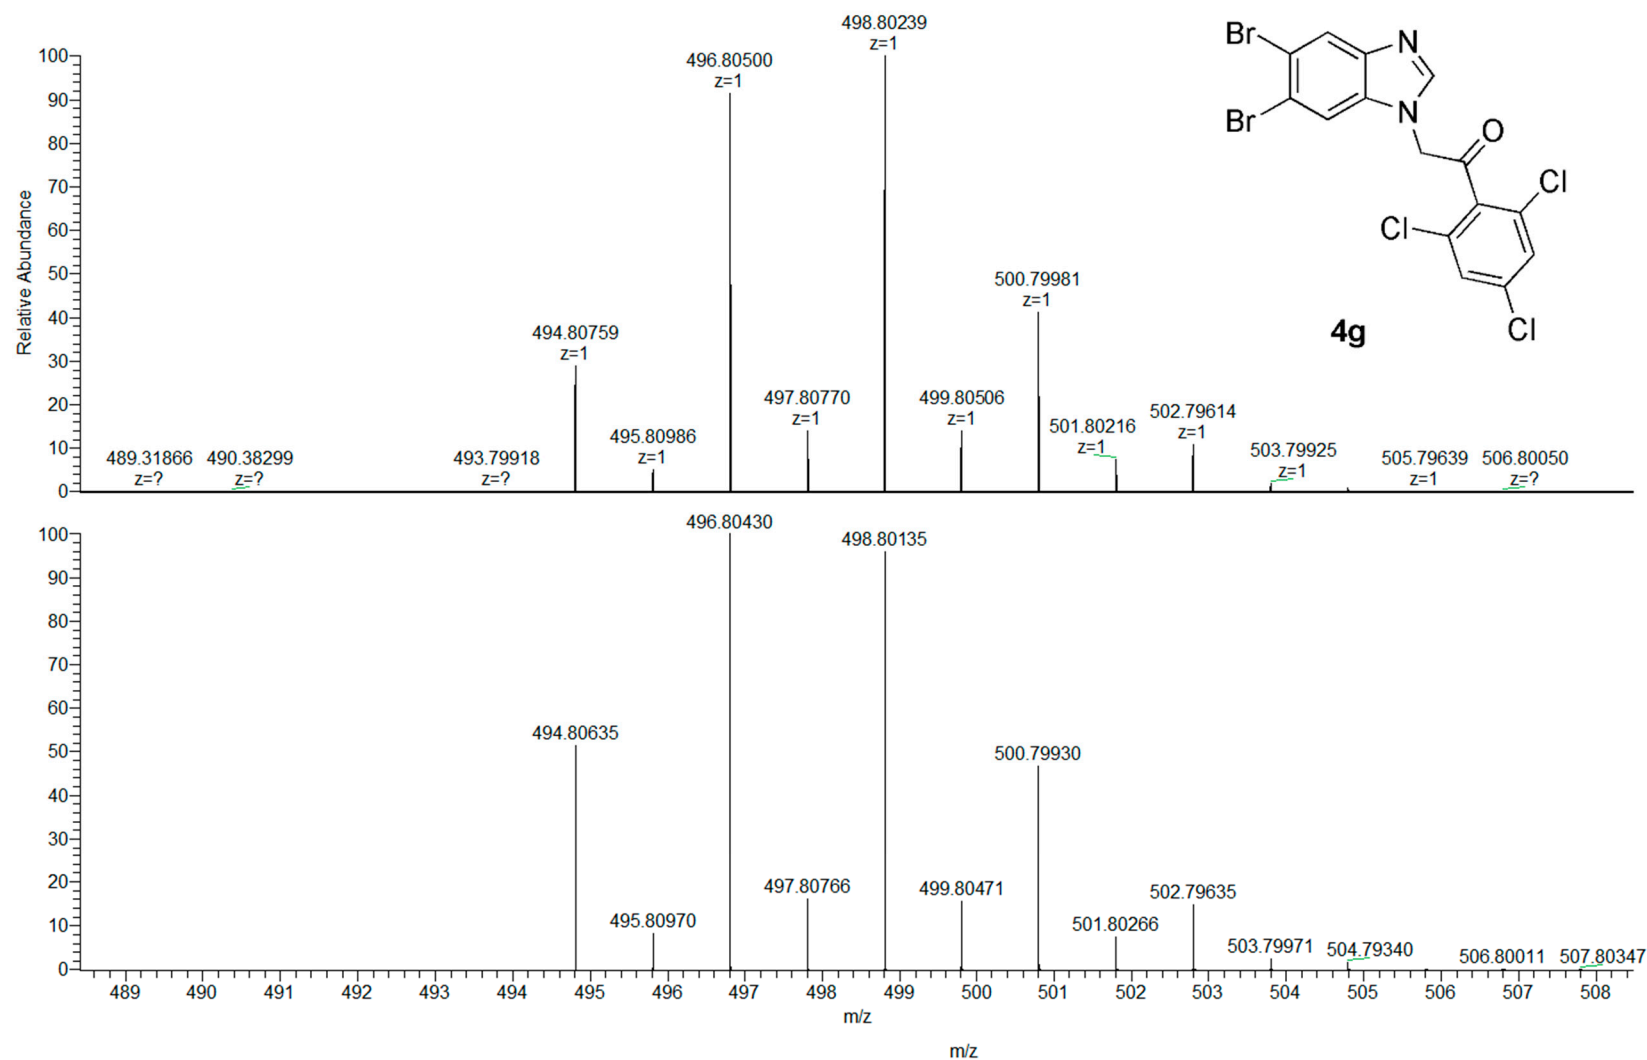

NL:  
3.71E8  
210517\_SYM\_2-4-  
6\_C#8-88 RT: 0.08-0.83  
AV: 81 T: FTMS + p ESI  
Full ms  
[150.0000-2000.0000]

NL:  
1.83E5  
C<sub>15</sub>H<sub>7</sub>Br<sub>2</sub>Cl<sub>3</sub>N<sub>2</sub>O +H:  
C<sub>15</sub>H<sub>8</sub>Br<sub>2</sub>Cl<sub>3</sub>N<sub>2</sub>O<sub>1</sub>  
pa Chrg 1

## 2-(5,6-dibromo-1H-benzimidazol-1-yl)-1-(2,4-difluorophenyl)ethanone (4h)

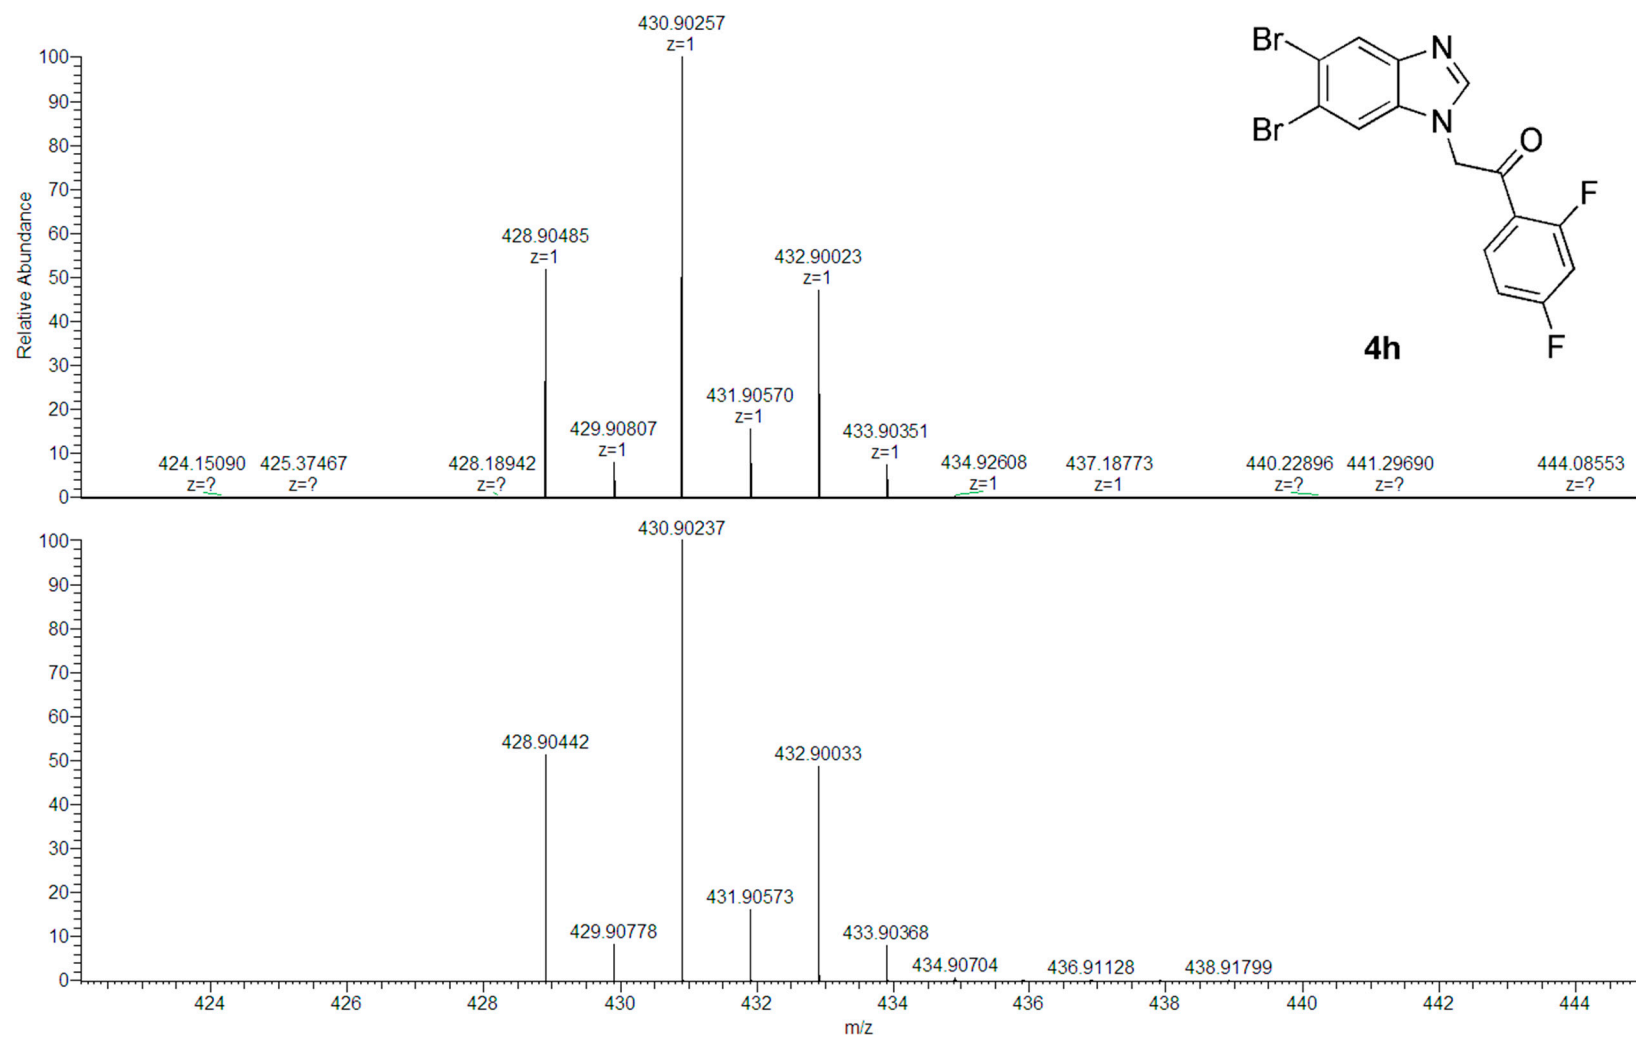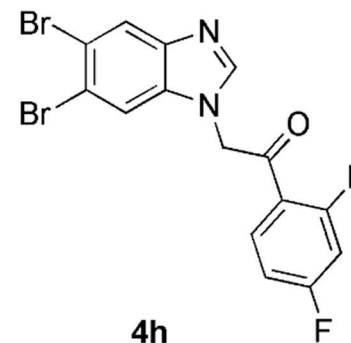

NL:  
3.25E8  
211025\_NIESYMETR\_2-  
4-F#11-99 RT: 0.10-0.86  
AV: 89 T: FTMS + p ESI  
Full ms  
[100.0000-1500.0000]

NL:  
4.21E5  
C<sub>15</sub>H<sub>8</sub>Br<sub>2</sub>F<sub>2</sub>N<sub>2</sub>O +H:  
C<sub>15</sub>H<sub>9</sub>Br<sub>2</sub>F<sub>2</sub>N<sub>2</sub>O<sub>1</sub>  
pa Chrg 1

## 2-(5,6-dibromo-1*H*-benzimidazol-1-yl)-1-(2,5-difluorophenyl)ethanone (4i)

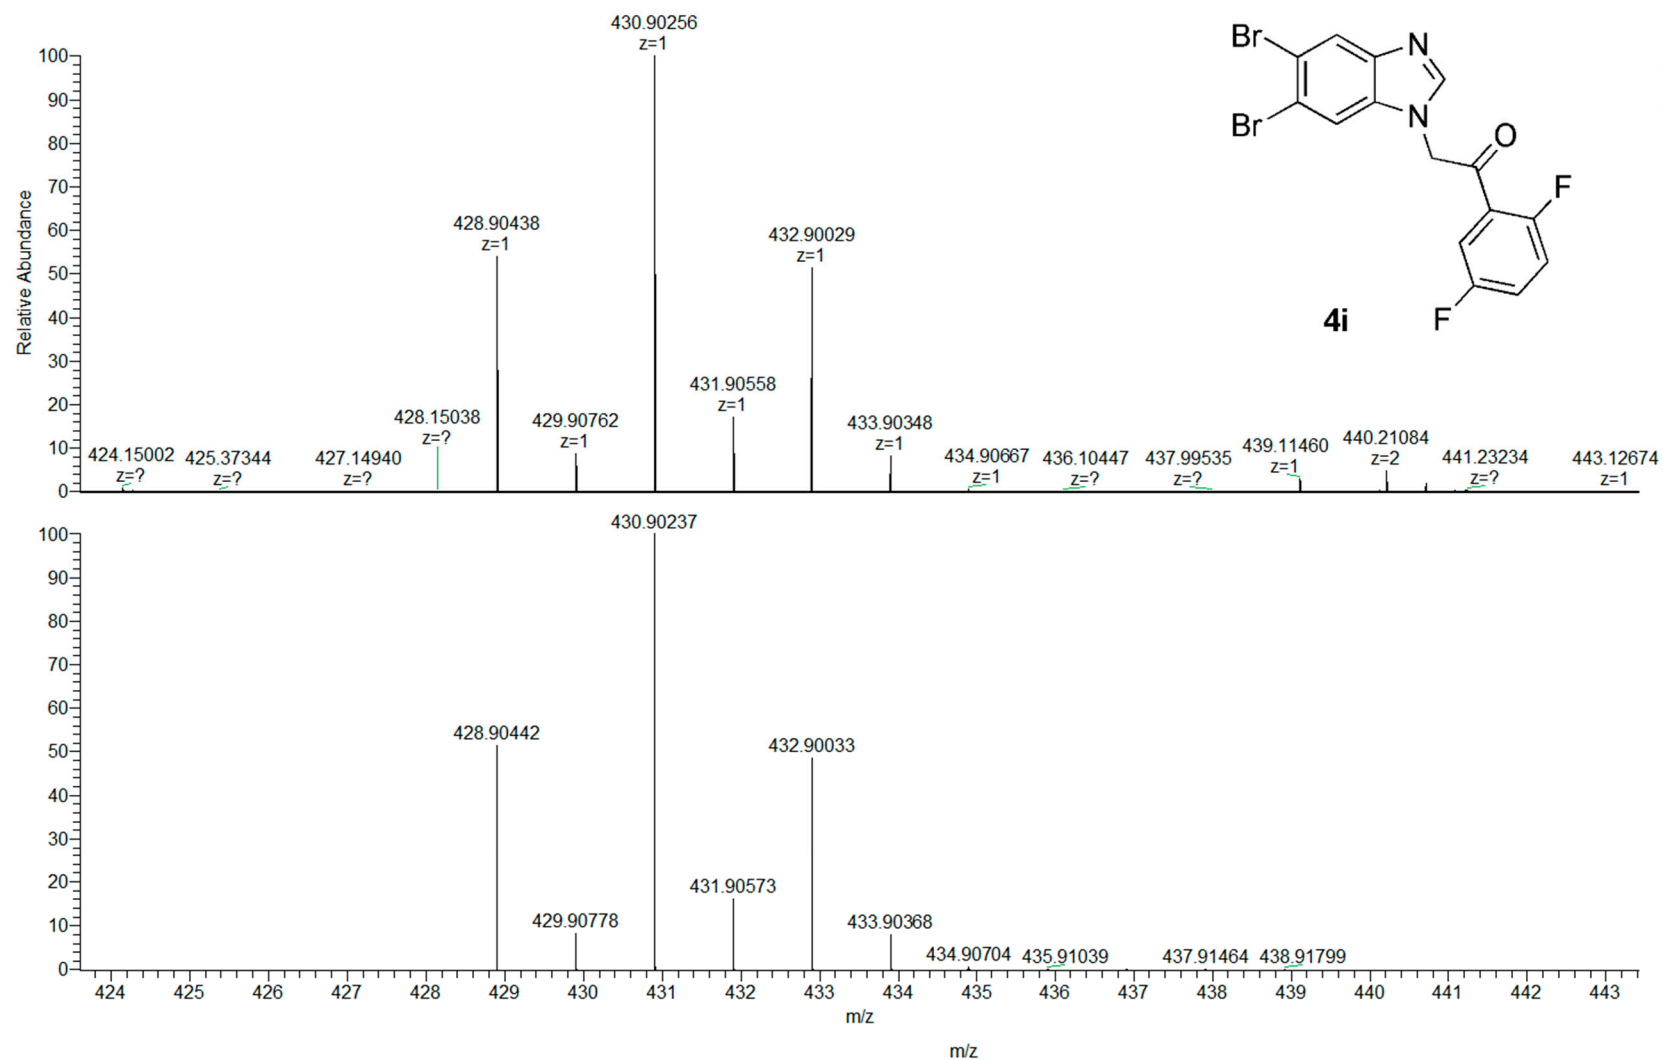

NL:  
3.50E7  
210517\_SYM\_2-5\_F#64-  
122 RT: 0.65-1.20 AV:  
59 T: FTMS + p ESI Full  
ms  
[150.0000-2000.0000]

NL:  
4.21E5  
C<sub>15</sub>H<sub>8</sub>Br<sub>2</sub>F<sub>2</sub>N<sub>2</sub>O +H:  
C<sub>15</sub>H<sub>9</sub>Br<sub>2</sub>F<sub>2</sub>N<sub>2</sub>O<sub>1</sub>  
pa Chrg 1

## 2-(4,6-dibromo-1H-benzimidazol-1-yl)-1-phenylethanone (5a)

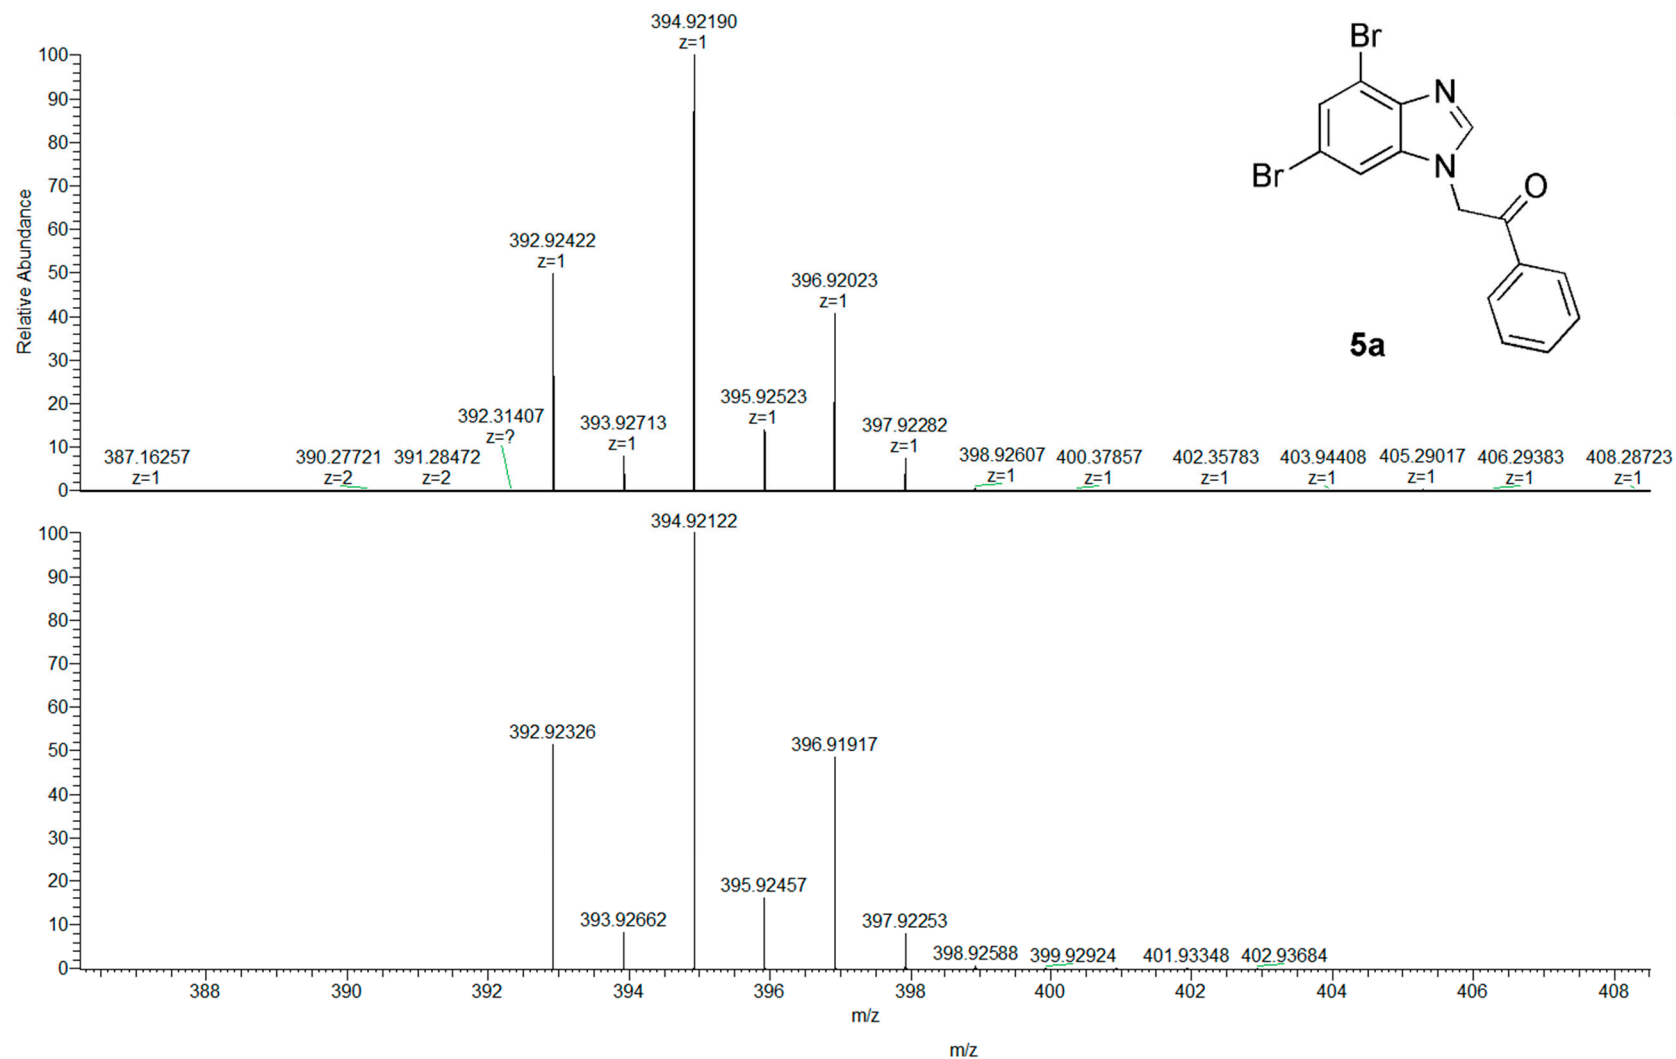

NL:  
2.68E8  
210526\_PB\_NIESYM\_P  
h#7-67 RT: 0.07-0.63  
AV: 61 T: FTMS + p ESI  
Full ms  
[160.0000-2000.0000]

NL:  
4.21E5  
C<sub>15</sub>H<sub>10</sub>Br<sub>2</sub>N<sub>2</sub>O +H:  
C<sub>15</sub>H<sub>11</sub>Br<sub>2</sub>N<sub>2</sub>O<sub>1</sub>  
pa Chrg 1

## 2-(4,6-dibromo-1H-benzimidazol-1-yl)-1-(4-chlorophenyl)ethanone (5c)

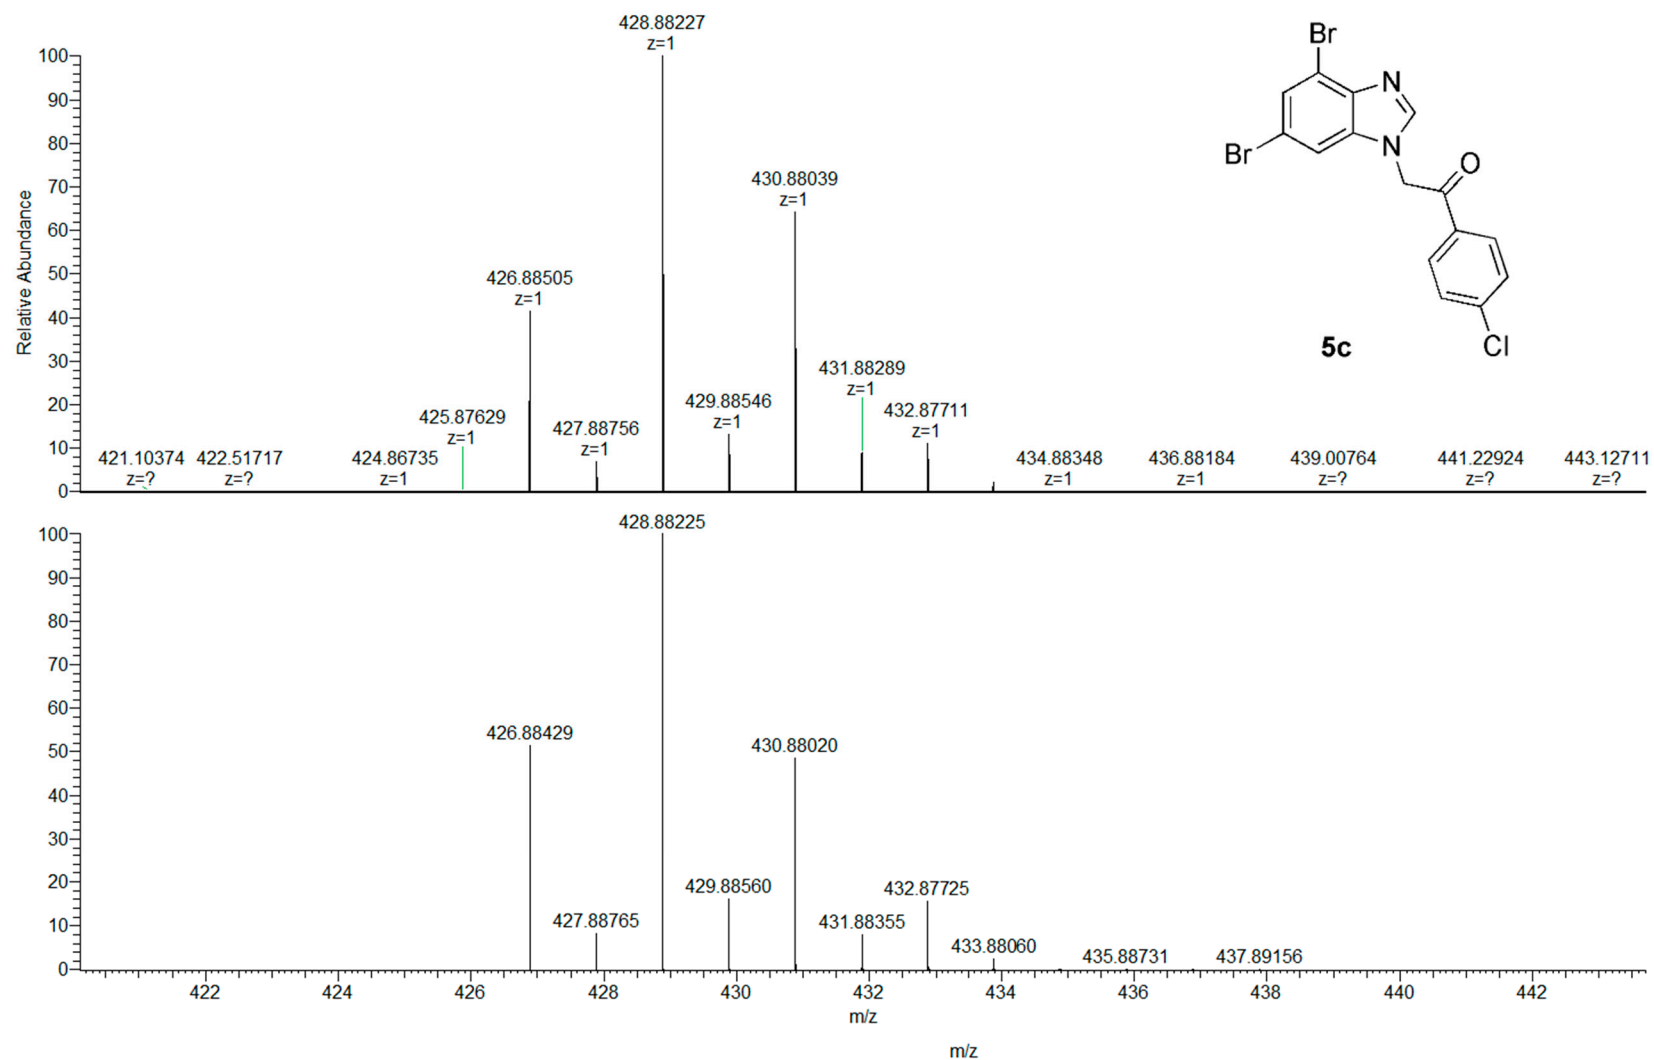

NL:  
1.48E9  
210517\_NIESYM\_4\_Ch#  
210-259 RT: 2.02-2.49  
AV: 50 T: FTMS + p ESI  
Full ms  
[150.0000-2000.0000]

NL:  
3.19E5  
C<sub>15</sub>H<sub>9</sub>Br<sub>2</sub>ClN<sub>2</sub>O +H:  
C<sub>15</sub>H<sub>10</sub>Br<sub>2</sub>ClN<sub>2</sub>O<sub>1</sub>  
pa Chrg 1

## 2-(4,6-dibromo-1H-benzimidazol-1-yl)-1-(2,4,6-trichlorophenyl)ethanone (5g)

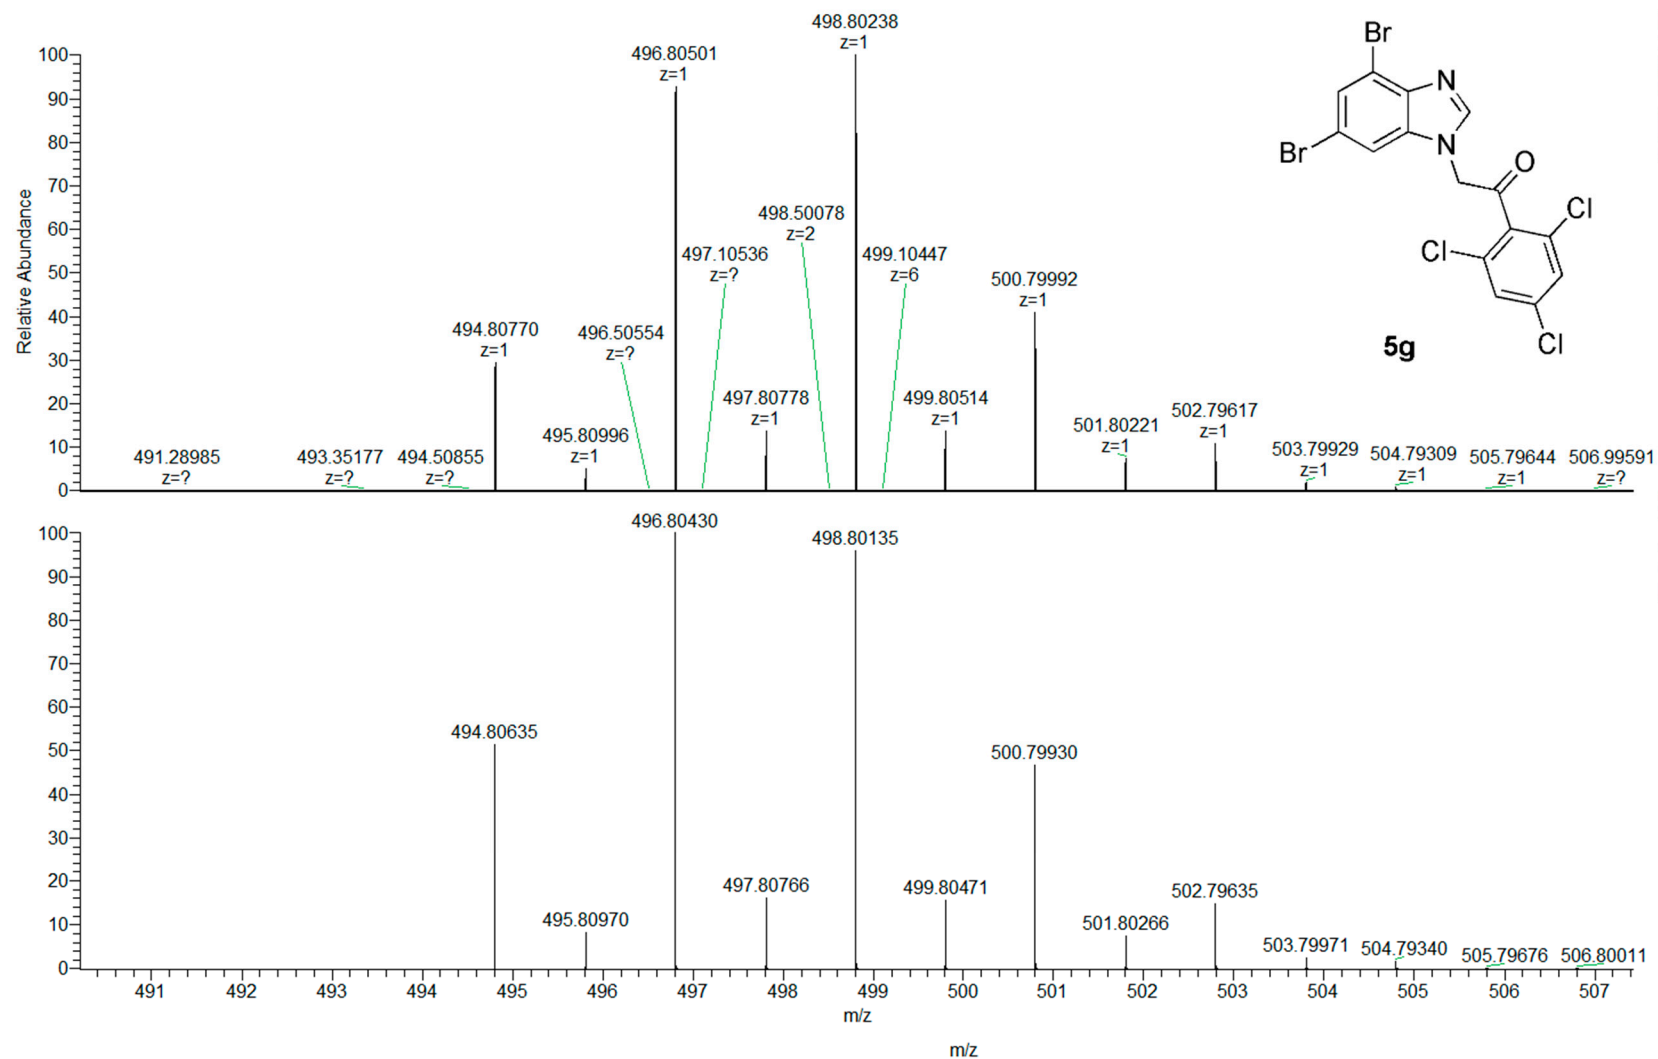

NL:  
2.29E8  
210517\_NIESYM\_2-4-  
6\_Cl#4-74 RT: 0.04-0.70  
AV: 71 T: FTMS + p ESI  
Full ms  
[150.0000-2000.0000]

NL:  
1.83E5  
C<sub>15</sub>H<sub>7</sub>Br<sub>2</sub>Cl<sub>3</sub>N<sub>2</sub>O +H:  
C<sub>15</sub>H<sub>8</sub>Br<sub>2</sub>Cl<sub>3</sub>N<sub>2</sub>O<sub>1</sub>  
pa Chrg 1



## 2-(4,6-dibromo-1H-benzimidazol-1-yl)-1-(2,5-difluorophenyl)ethanone (5i)

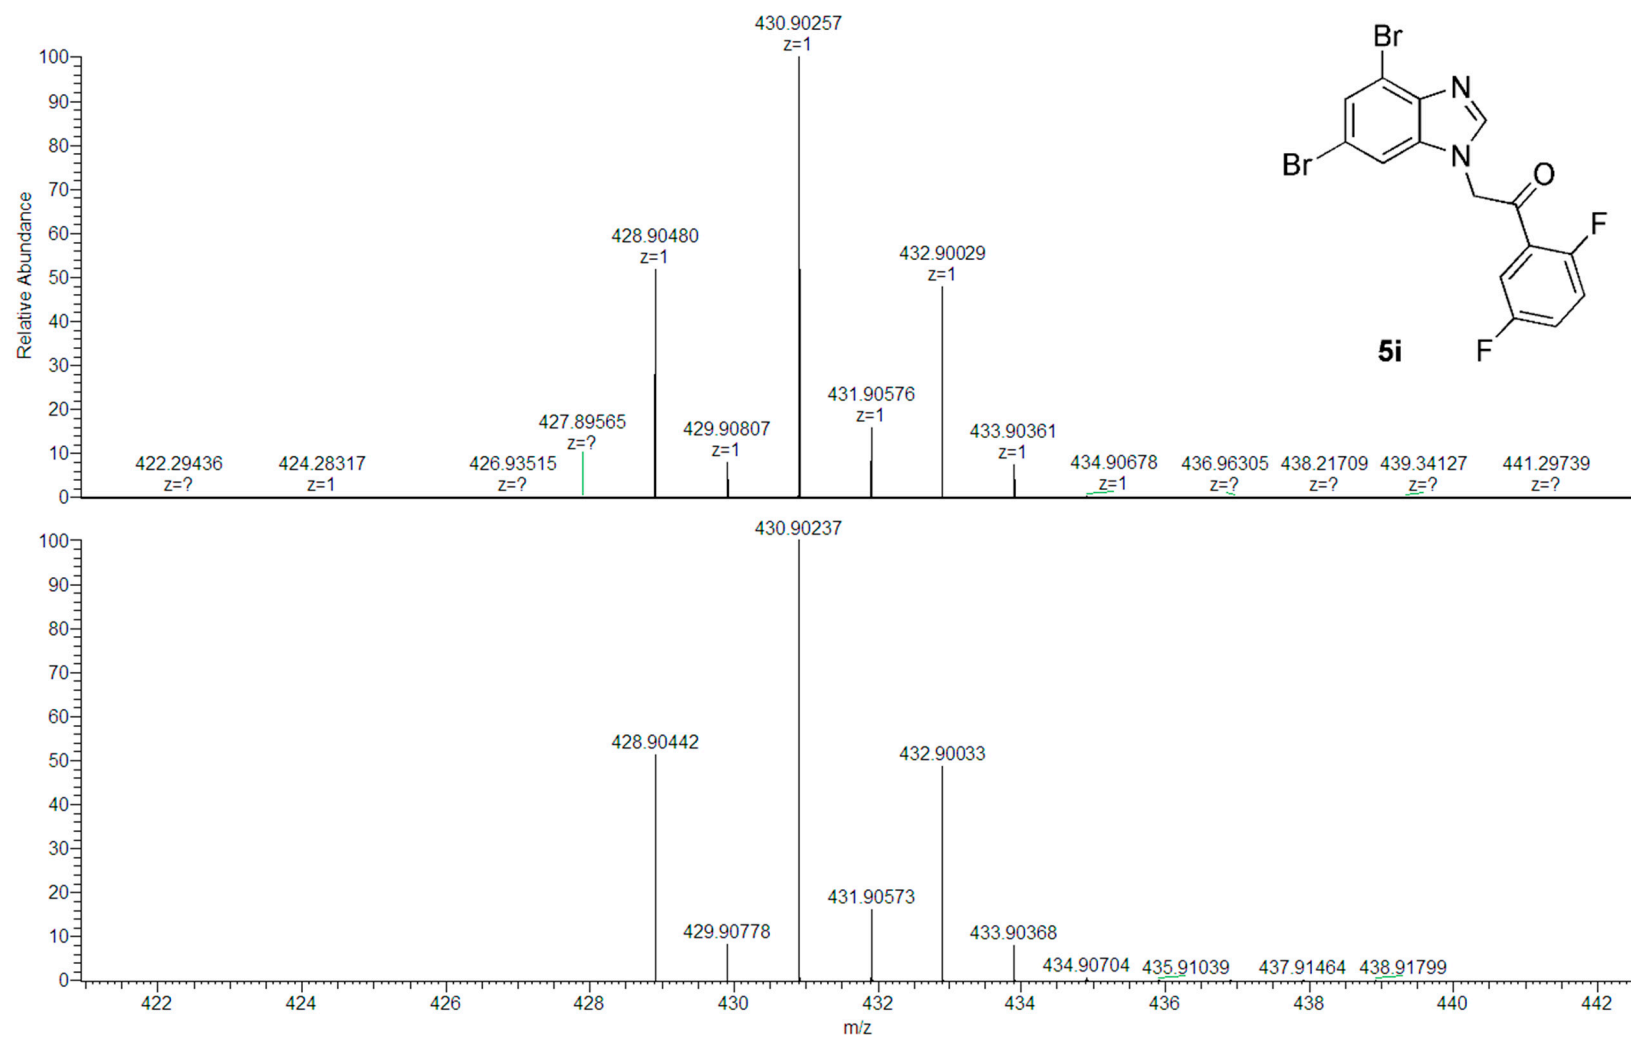

NL:  
2.27E8  
211025\_NIESYMETR\_2-  
5-F#26-130 RT:  
0.23-1.13 AV: 105 T:  
FTMS + p ESI Full ms  
[100.0000-1500.0000]

NL:  
4.21E5  
C<sub>15</sub>H<sub>8</sub>Br<sub>2</sub>F<sub>2</sub>N<sub>2</sub>O +H:  
C<sub>15</sub>H<sub>9</sub>Br<sub>2</sub>F<sub>2</sub>N<sub>2</sub>O<sub>1</sub>  
pa Chrg 1

## 5. Products of 2,4-dichlorophenacyl chloride 3e condensation reaction

To the solution of 2,4-dichlorophenacyl chloride (10 mmol, 2.23 g) in MeCN (50 ml) powdered  $K_2CO_3$  (50 mmol, 6.91 g) was added. The mixture was stirred at rt for 24 h, filtered, evaporated to dryness. The semi-solid orange residue was analyzed by TLC (plate length 15 cm, hexane/EtOAc 95:5).

Five products were found with the following  $R_f$  values: 0.61, 0.53, 0.47, 0.36, 0.30. TLC analysis did not reveal the presence of the substrate ( $R_f$  0.52).

The mixture of products (orange semi-solid residue) was separated by column chromatography (the residue was dissolved in hexane/EtOAc 9:1, silica gel, eluent: hexane/ethyl acetate gradient, from 100:0 to 100:3). Sample of pure products with  $R_f$  0.53, 0.36 and 0.30 were isolated and analyzed.

### Compound 6e

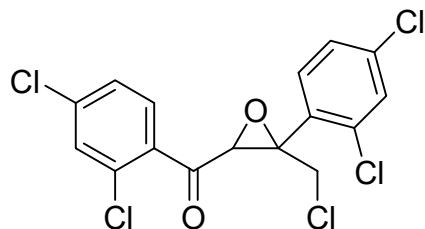

**6e**

White solid, m.p. 132-133°C;  $R_f$  0.53;  $^1H$  NMR (500 MHz,  $CDCl_3$ )  $\delta$  = 3.84 (d,  $J$  = 11.98 Hz, 1H,  $CHHCl$ ), 4.13 (d,  $J$  = 11.98 Hz, 1H,  $CHHCl$ ), 4.32 (s, 1H,  $C(O)CH$ ), 7.33 (dd,  $J$  = 8.31 Hz,  $J$  = 1.96 Hz, 1H,  $C_6H_2$ ), 7.41 (dd,  $J$  = 8.31 Hz,  $J$  = 1.96 Hz, 1H,  $C_6H_2$ ), 7.43 (d,  $J$  = 1.96 Hz, 1H,  $C_6H_2$ ), 7.49 (d,  $J$  = 8.31 Hz, 1H,  $C_6H_2$ ), 7.54 (d,  $J$  = 1.96 Hz, 1H,  $C_6H_2$ ), 7.65 (d,  $J$  = 8.31 Hz, 1H,  $C_6H_2$ );  $^{13}C$  NMR (125 MHz,  $CDCl_3$ )  $\delta$  = 43.38, 65.12, 65.90, 127.29, 127.65, 129.42, 130.85, 130.92, 131.49, 132.61, 132.87, 133.17, 134.75, 135.83, 139.14, 193.62; HRMS: calculated for  $C_{16}H_{10}Cl_5O_2$   $[M+H]^+$ : 410.90884. Found: 410.90881.

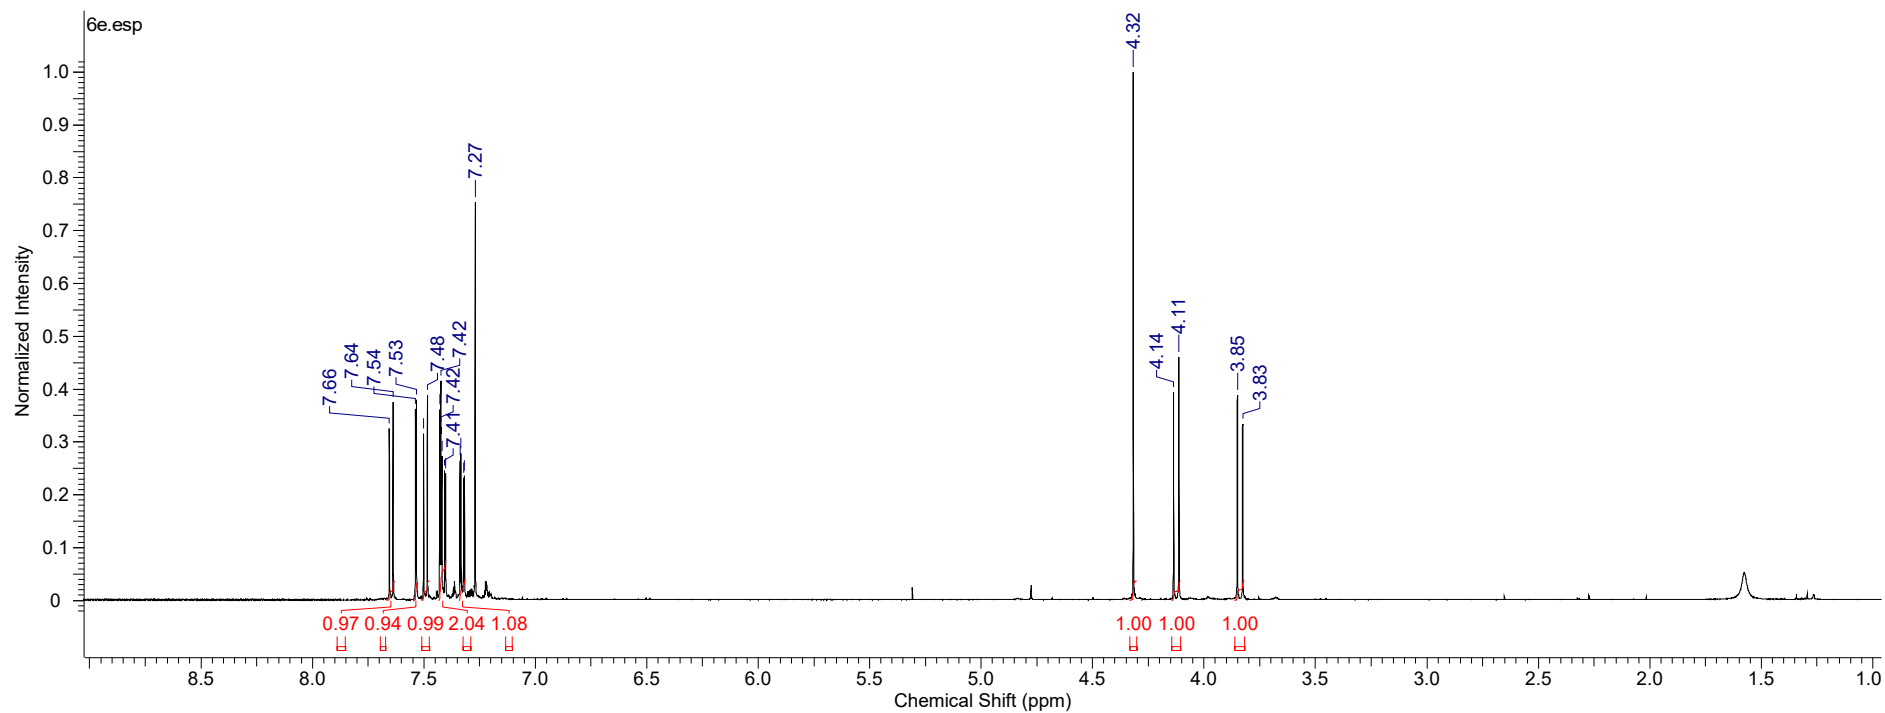

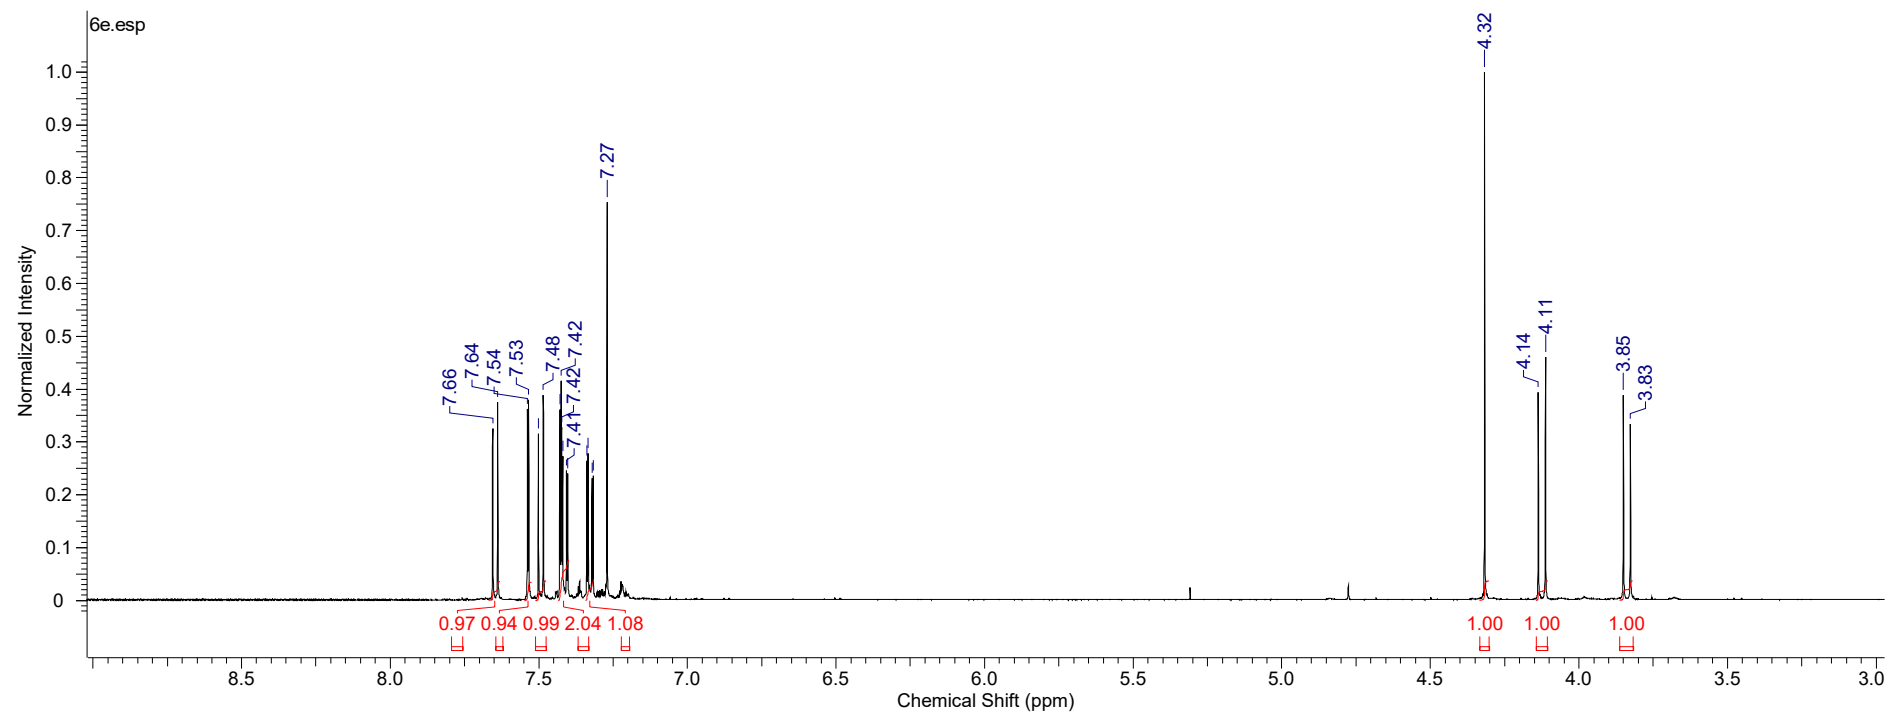

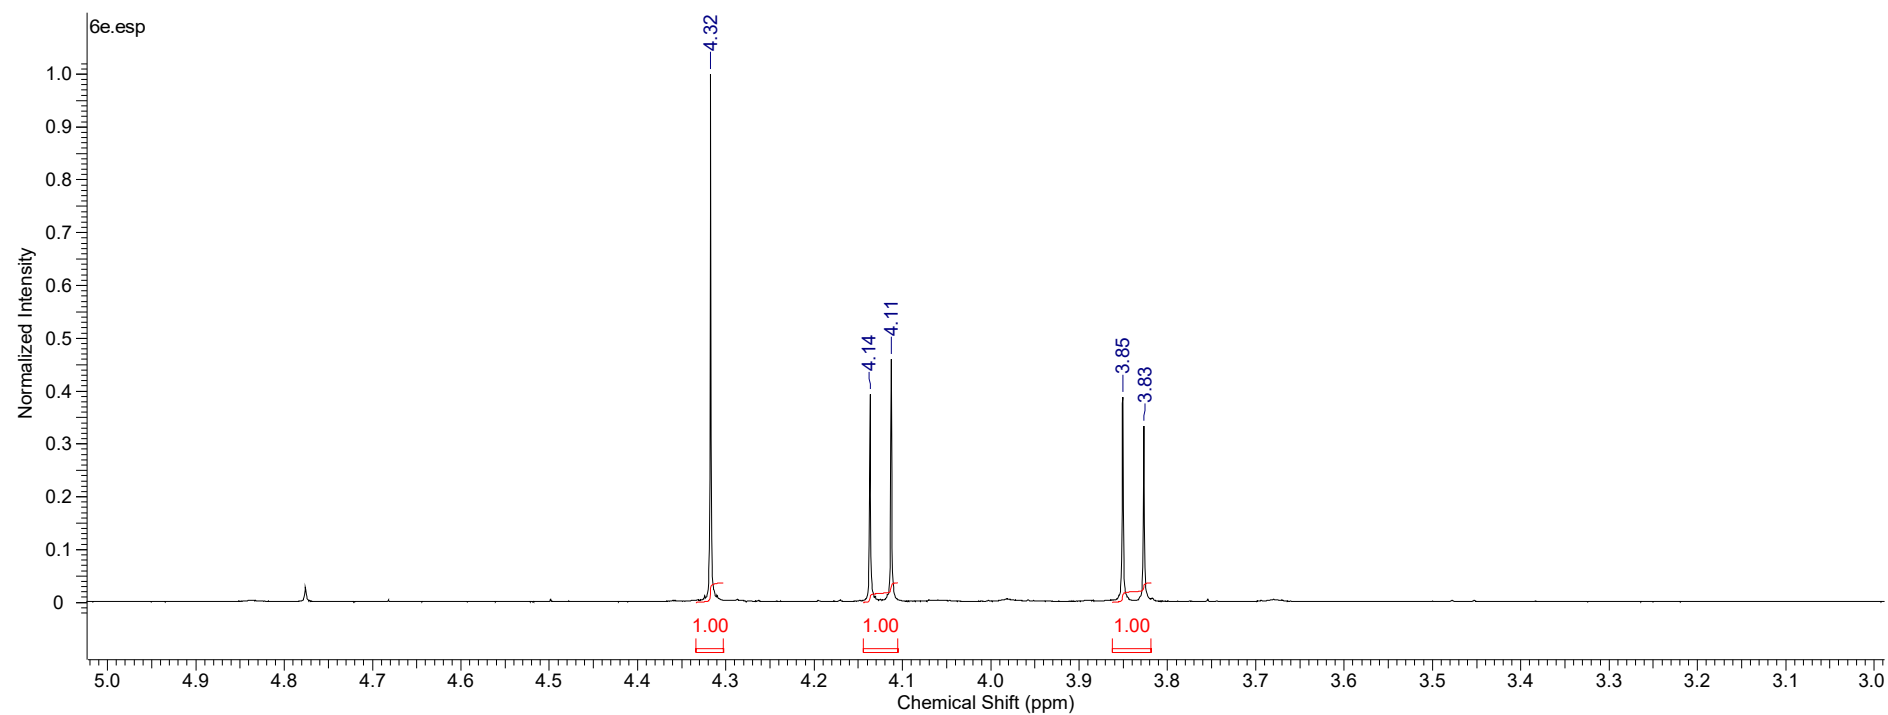

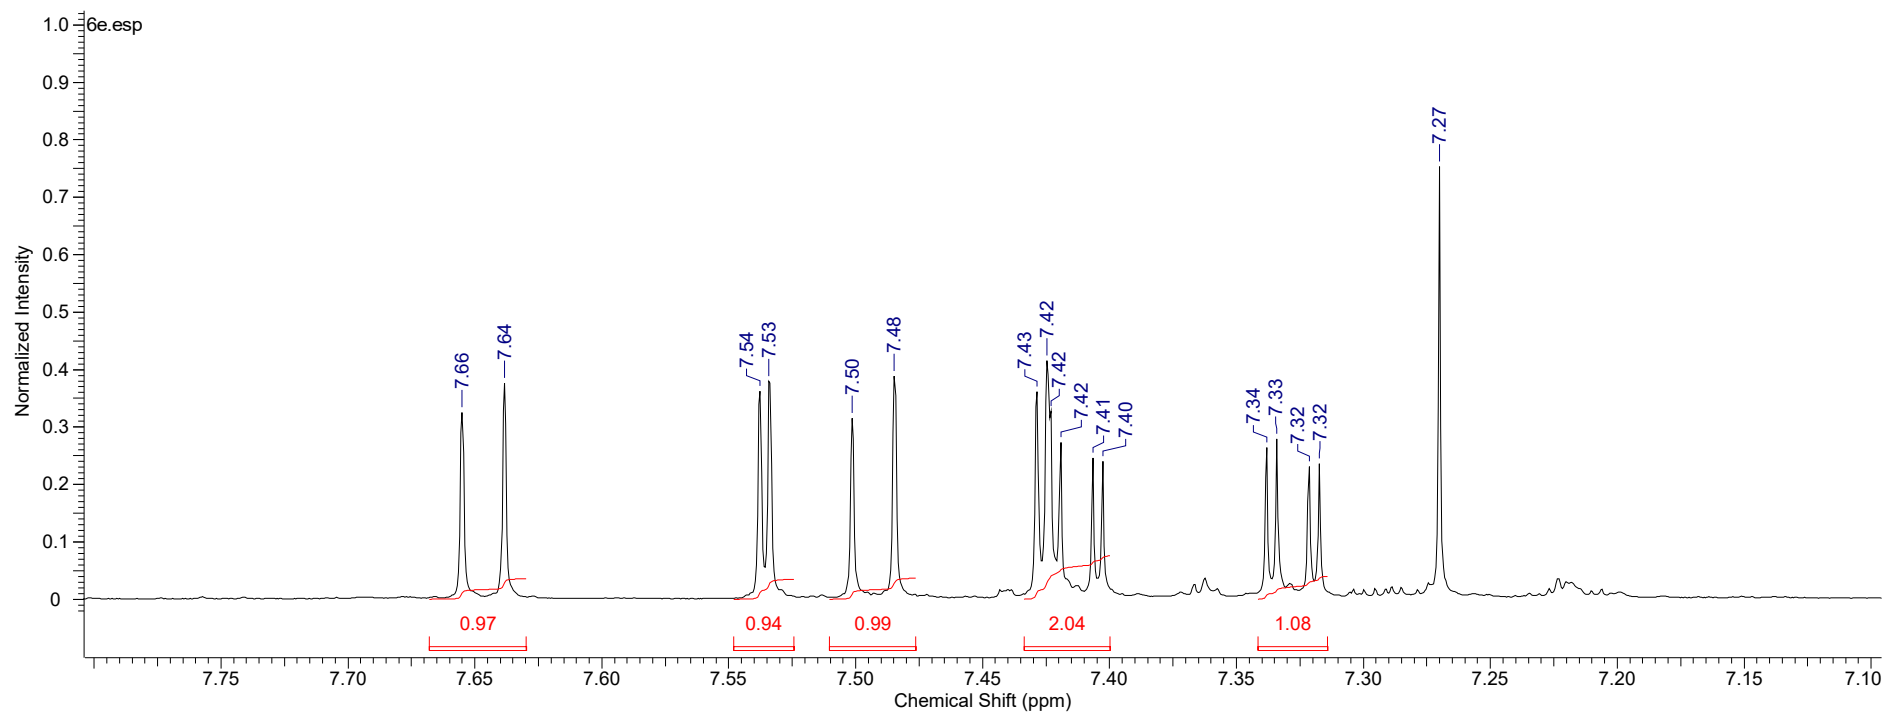

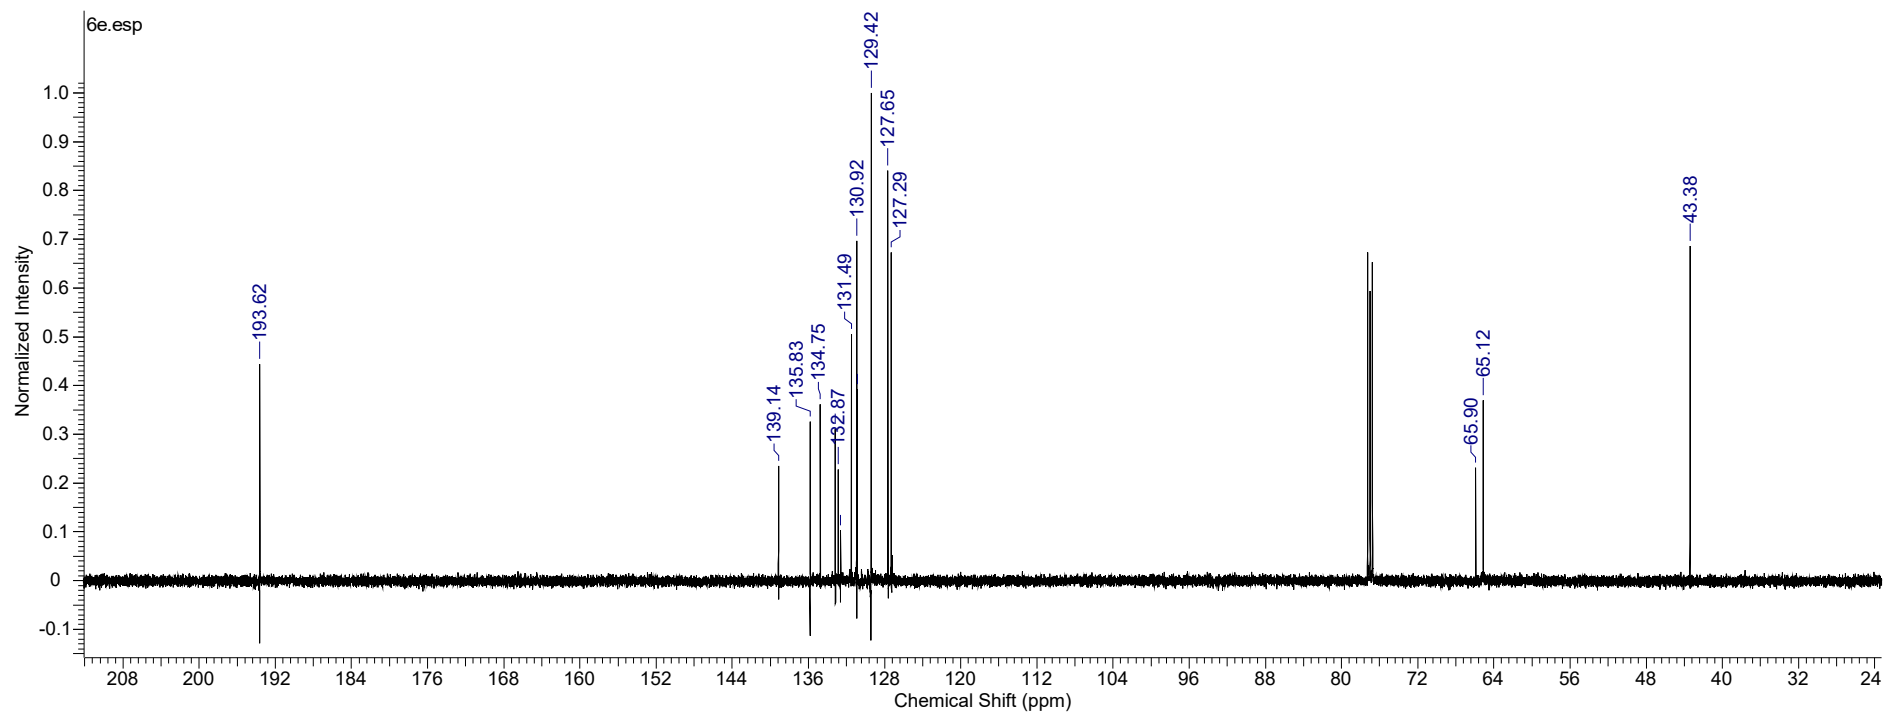

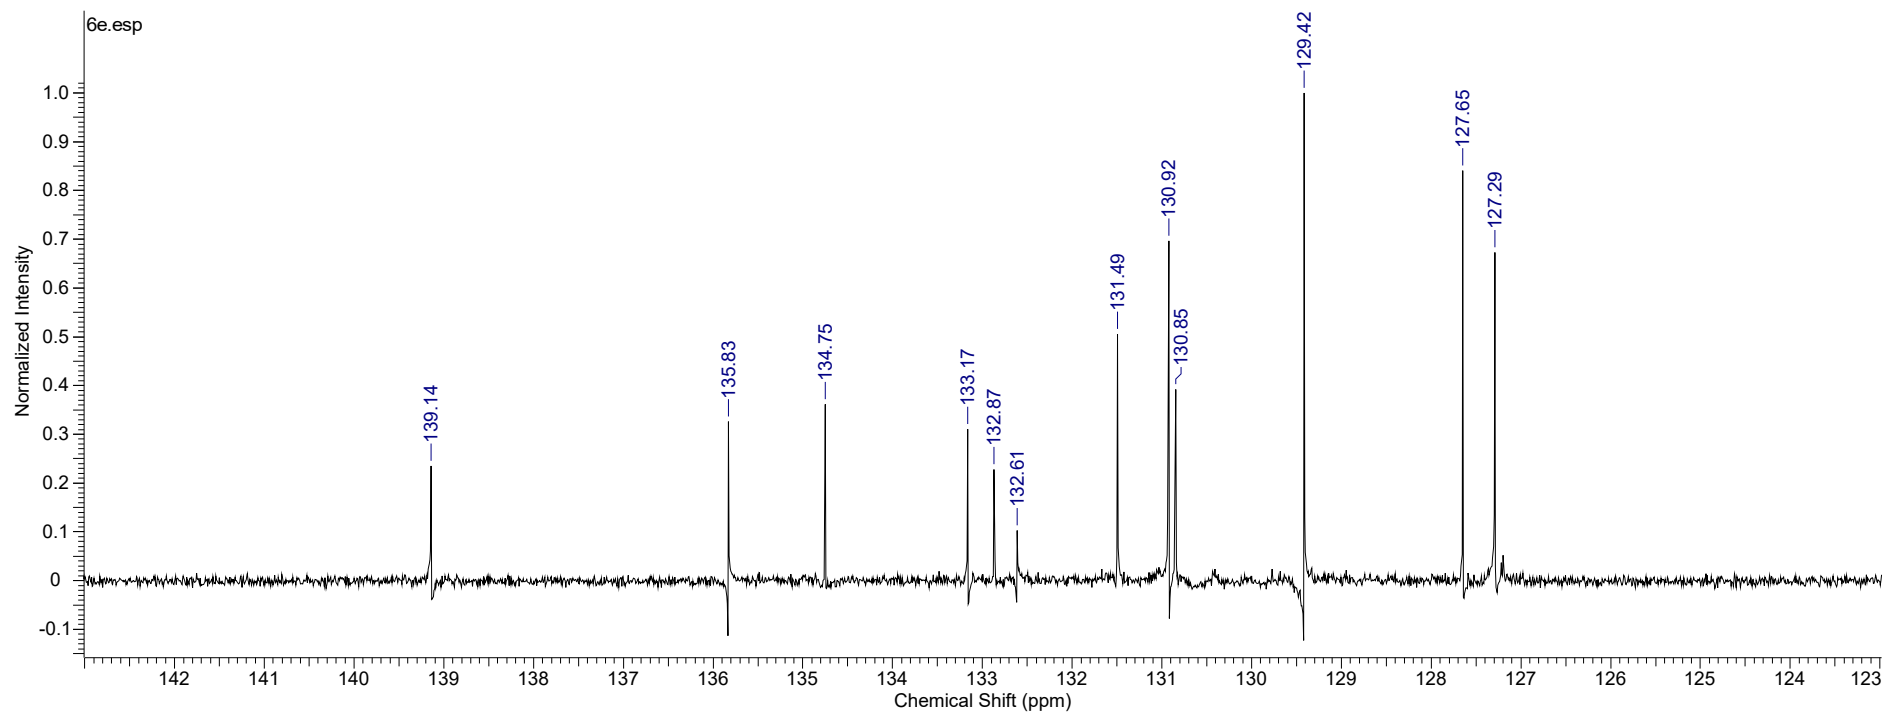



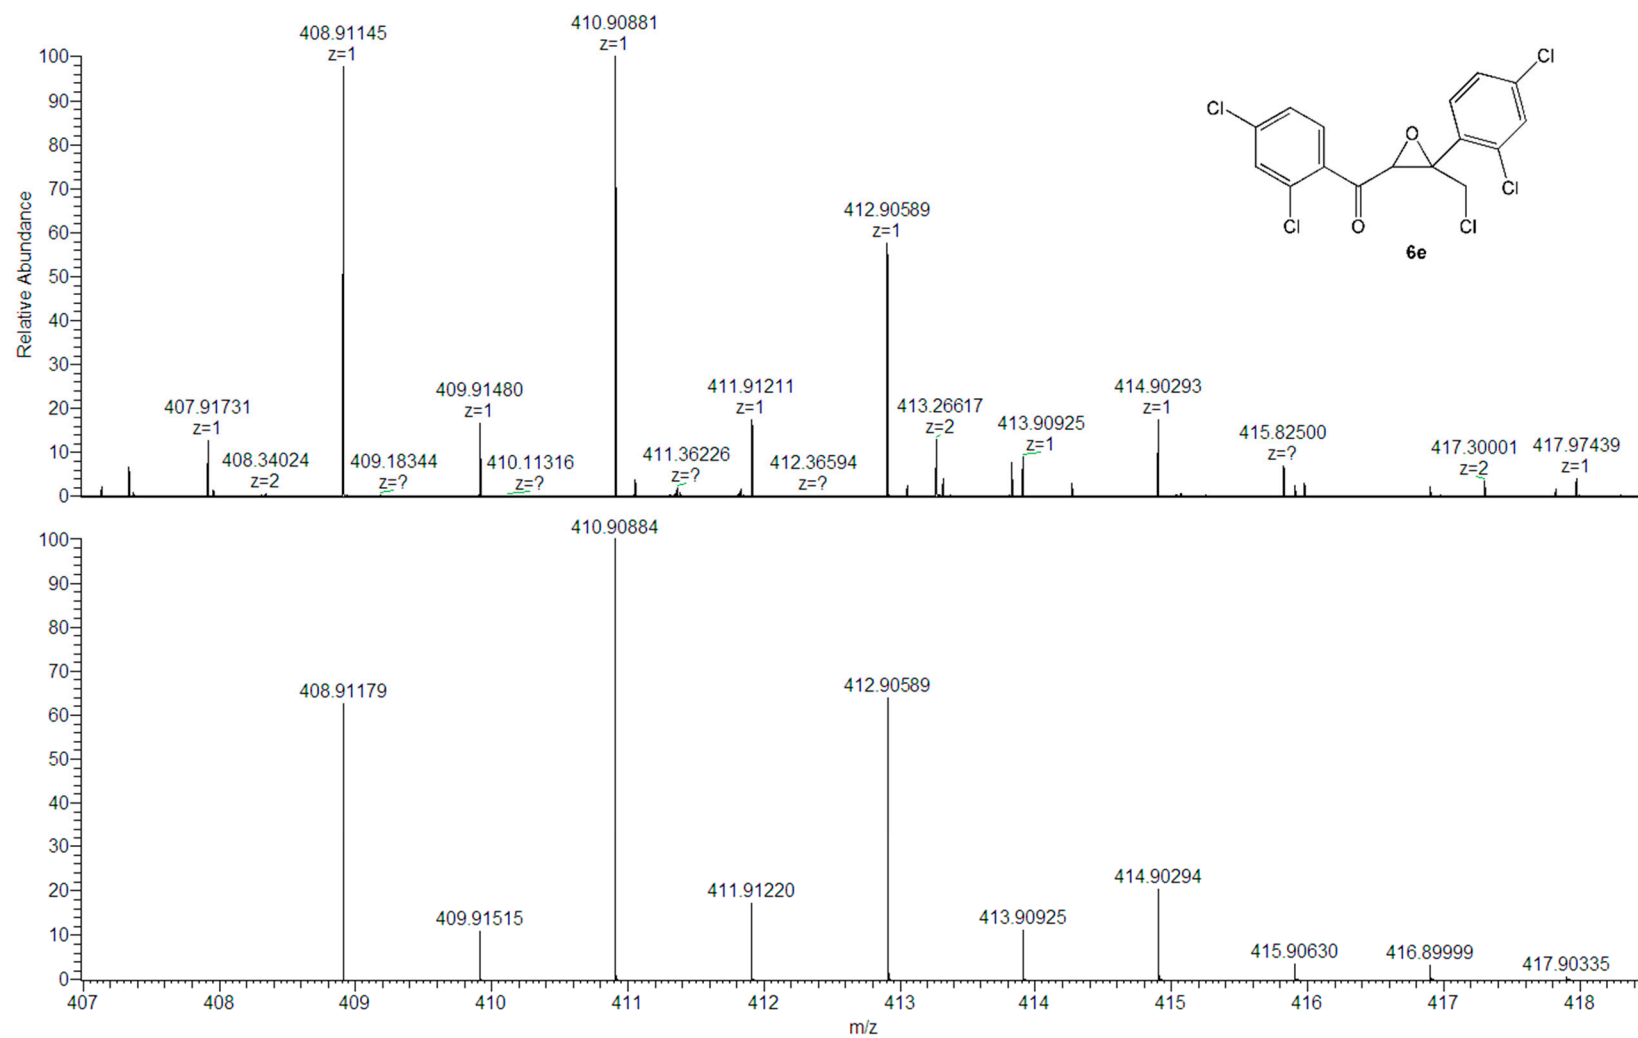

NL:  
 7.61E5  
 220421\_AK\_PROD\_2#  
 248-387 RT: 2.17-3.39  
 AV: 140 T: FTMS + p  
 ESI Full ms  
 [160.0000-2000.0000]

NL:  
 3.34E5  
 C<sub>16</sub>H<sub>9</sub>Cl<sub>5</sub>O<sub>2</sub> +H:  
 C<sub>16</sub>H<sub>10</sub>Cl<sub>5</sub>O<sub>2</sub>  
 pa Chrg 1

**Compound 7e**

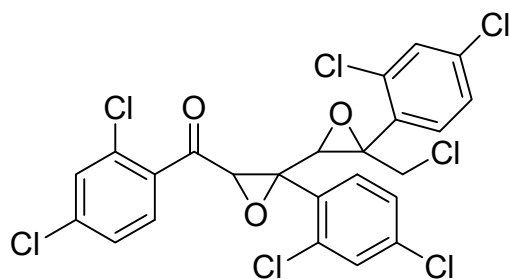

**7e**

White solid, m.p. 104-106°C;  $R_f$  0.47;  $^1\text{H}$  NMR (500 MHz,  $\text{CDCl}_3$ )  $\delta$  = 3.95 (s, 1H, CH-O), 4.16 (d,  $J$  = 11.49 Hz, 1H, CHHCl), 4.37 (d,  $J$  = 11.49 Hz, 1H, CHHCl), 4.69 (s, 1H, CH-O), 7.22-7.28 (m, 6H,  $\text{C}_6\text{H}_2$ ), 7.36-7.40 (m, 1H,  $\text{C}_6\text{H}_2$ ), 7.37 (d,  $J$  = 1.96 Hz, 1H,  $\text{C}_6\text{H}_2$ ), 7.42 (d,  $J$  = 1.96 Hz, 1H,  $\text{C}_6\text{H}_2$ );  $^{13}\text{C}$  NMR (125 MHz,  $\text{CDCl}_3$ )  $\delta$  = 23.25, 24.94, 25.73, 27.64, 89.59, 89.64, 90.08, 91.53, 91.98, 93.02, 93.49, 93.62, 93.78, 94.91, 95.96, 95.99, 96.63, 97.92, 98.69, 101.32; HRMS: calculated for  $\text{C}_{24}\text{H}_{14}\text{Cl}_7\text{O}_3$   $[\text{M}+\text{H}]^+$ : 598.86981. Found: 596.86967.

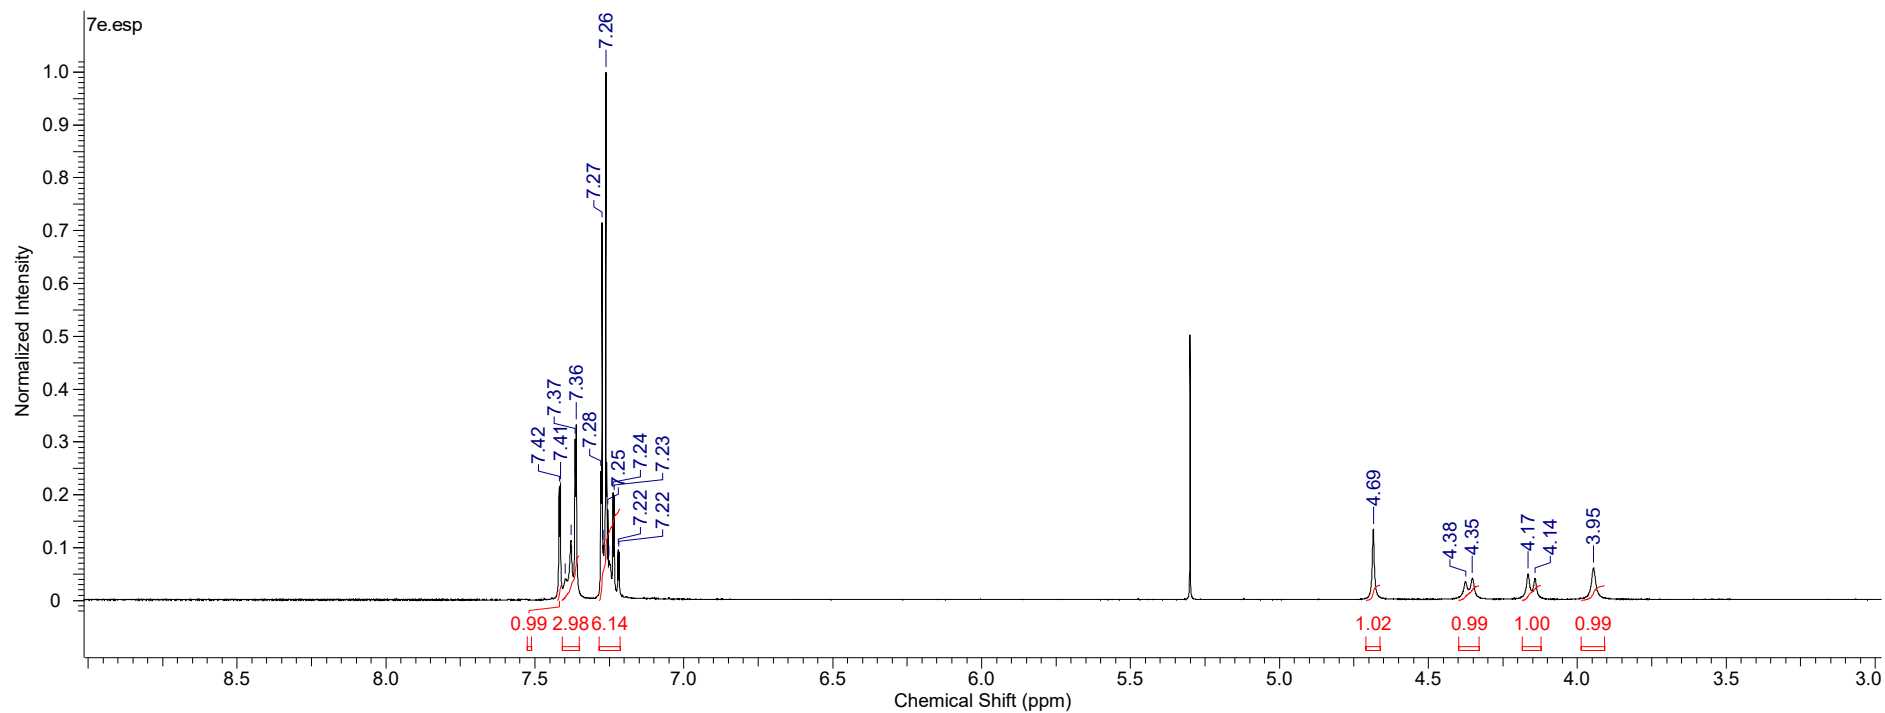

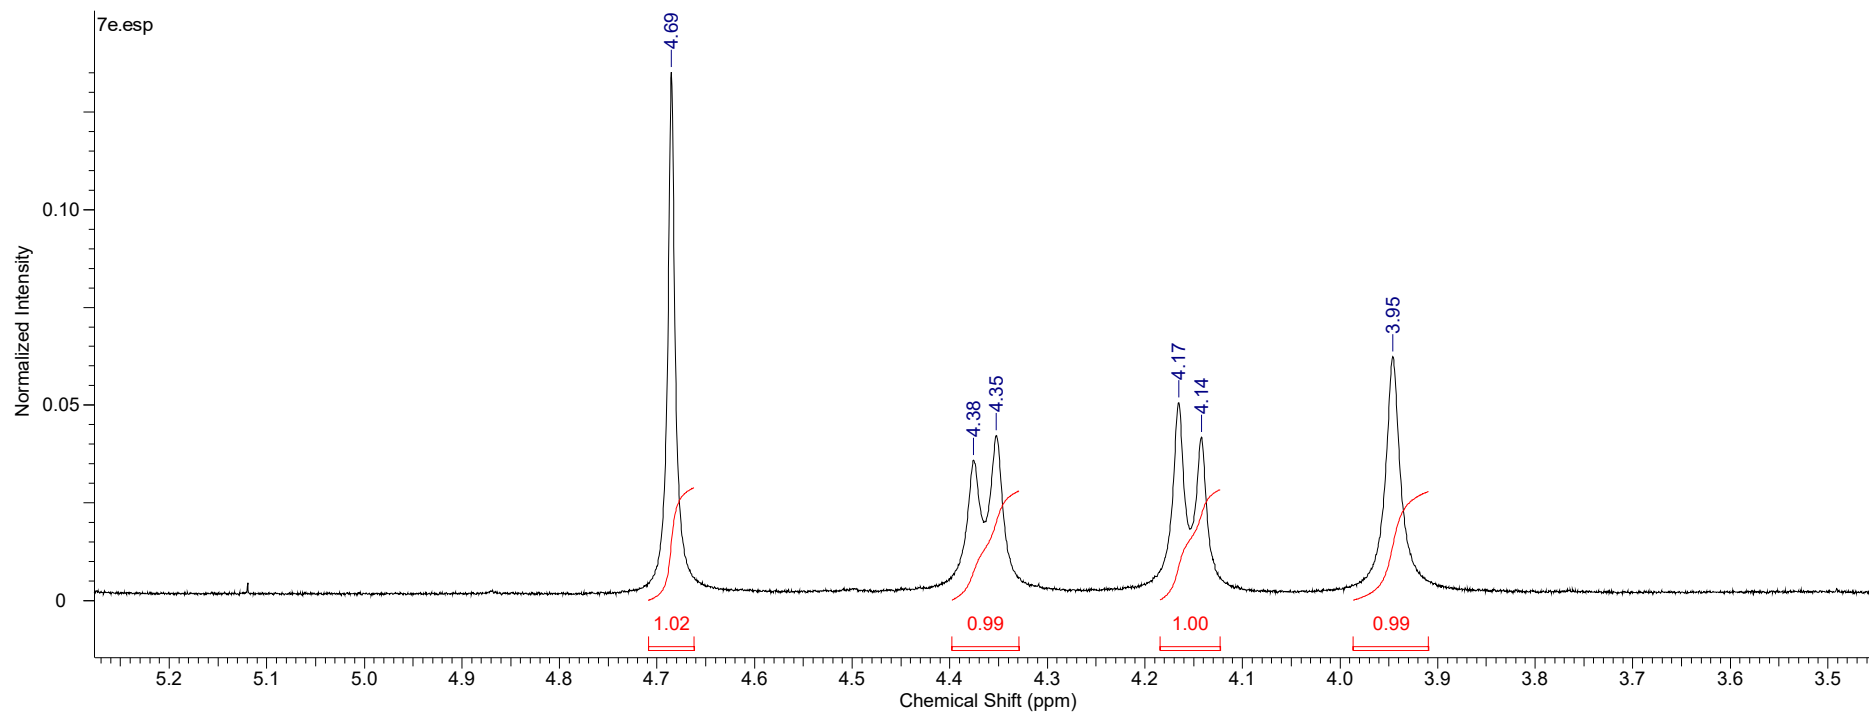

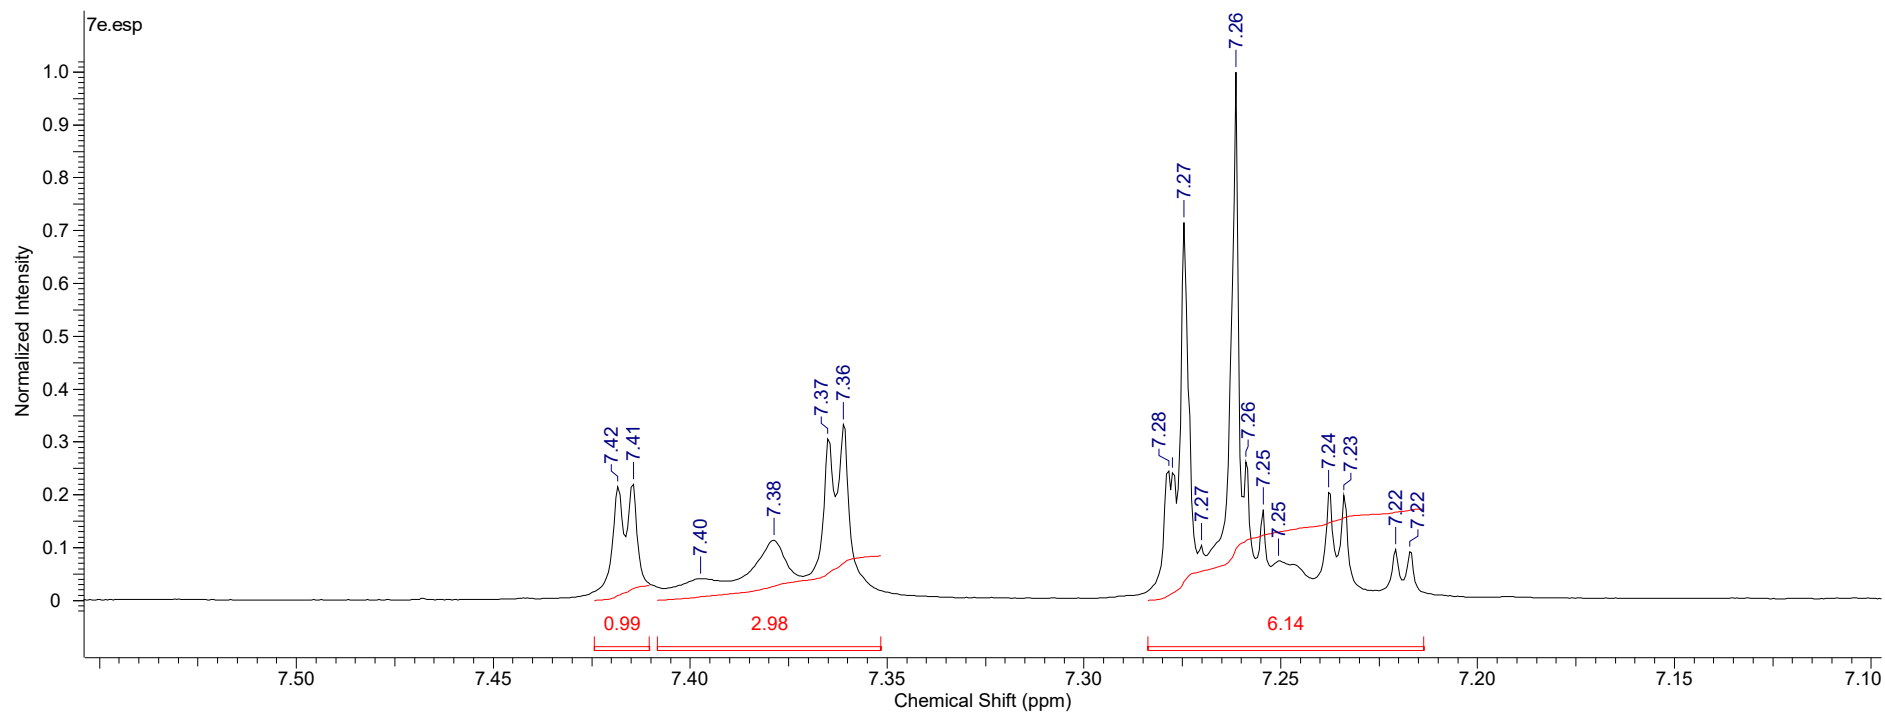

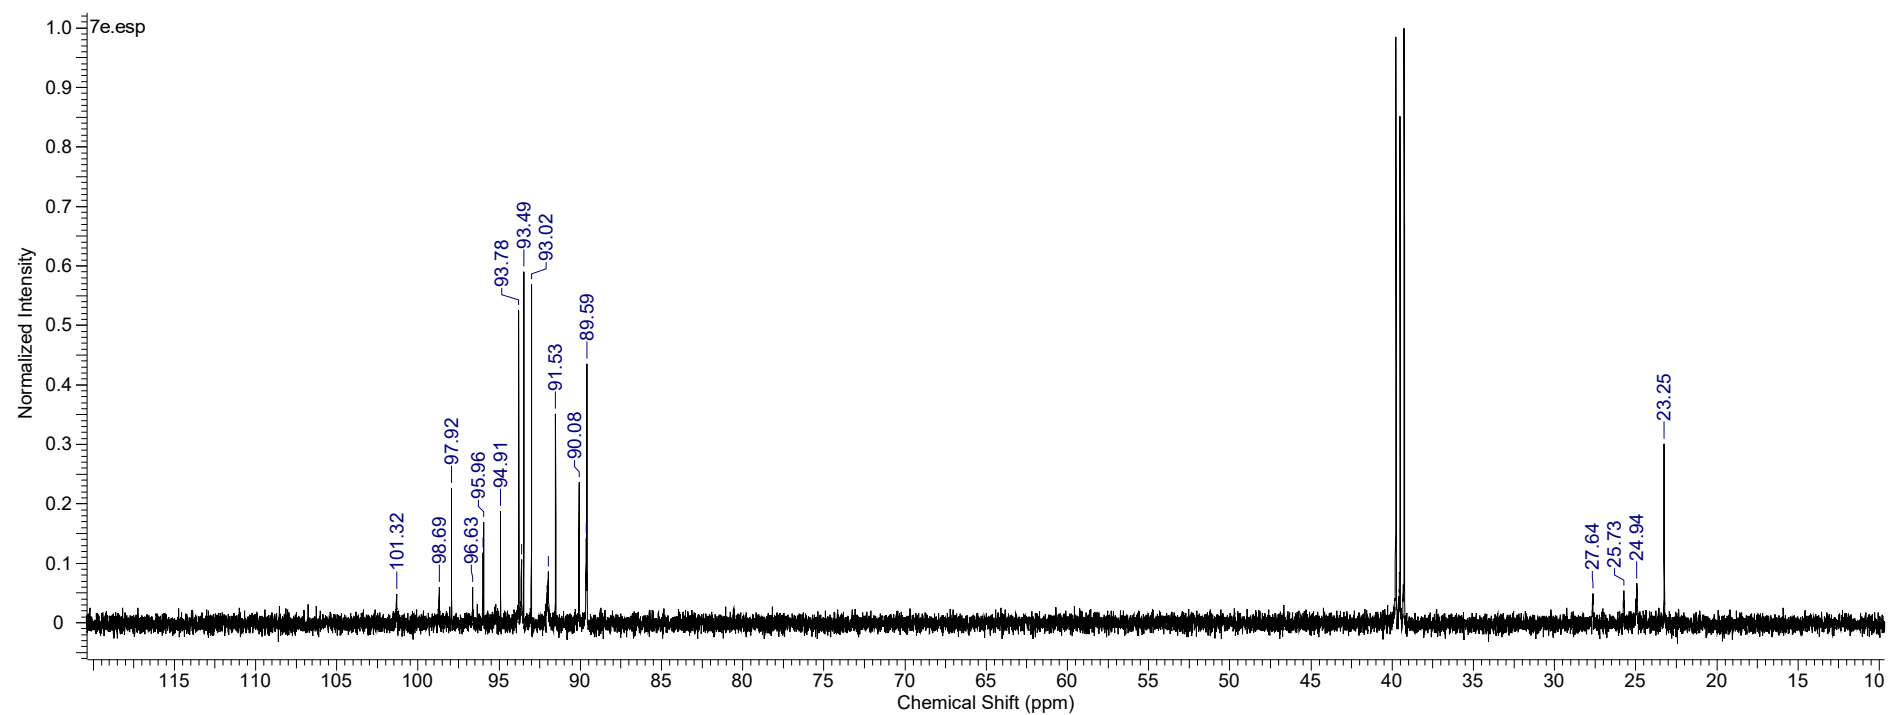

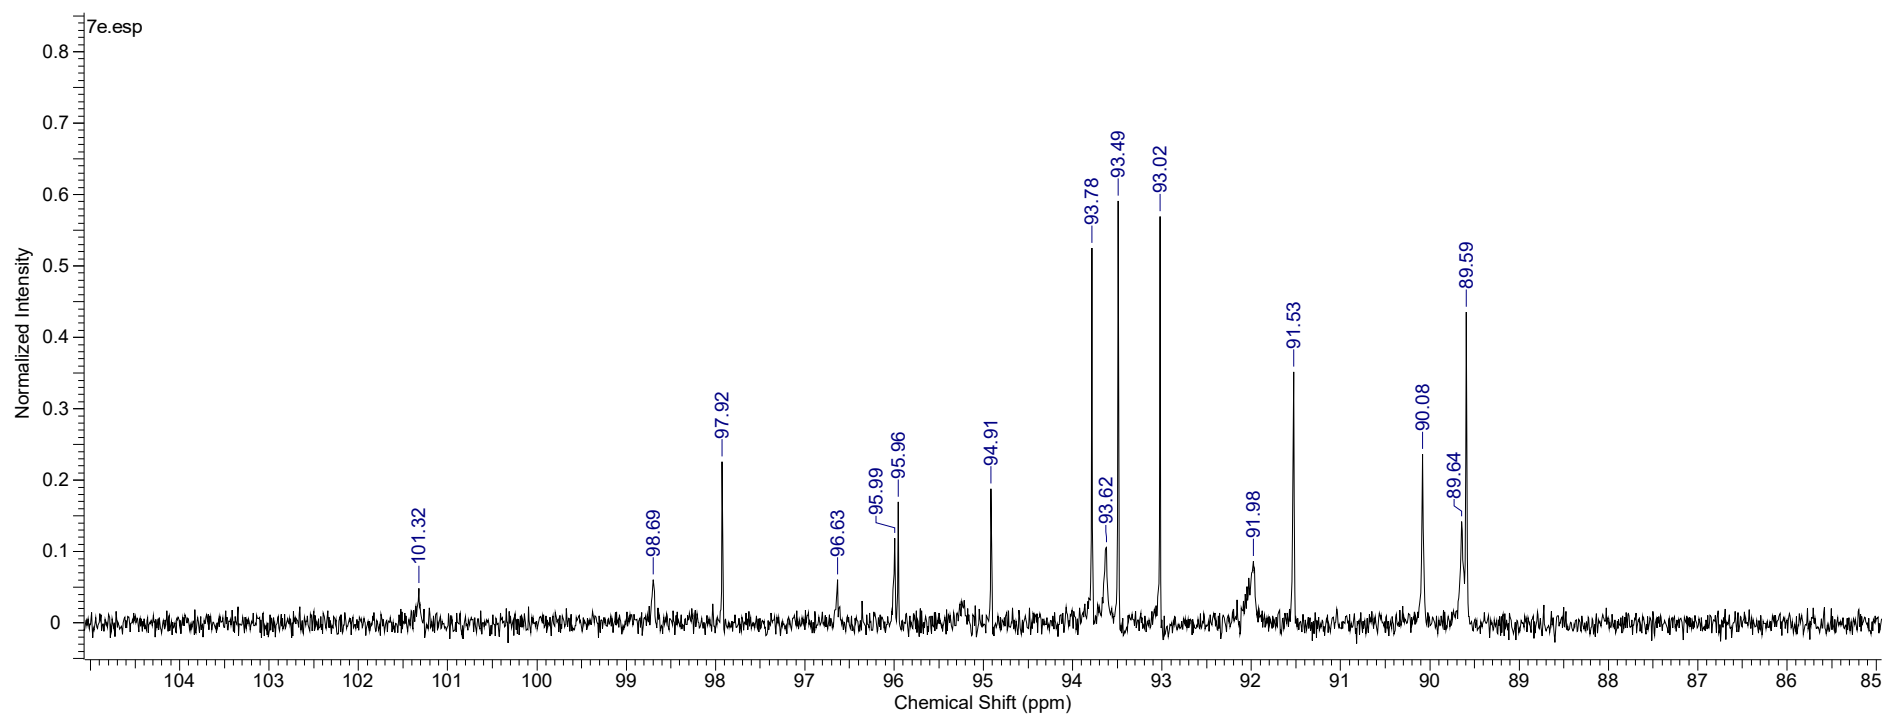

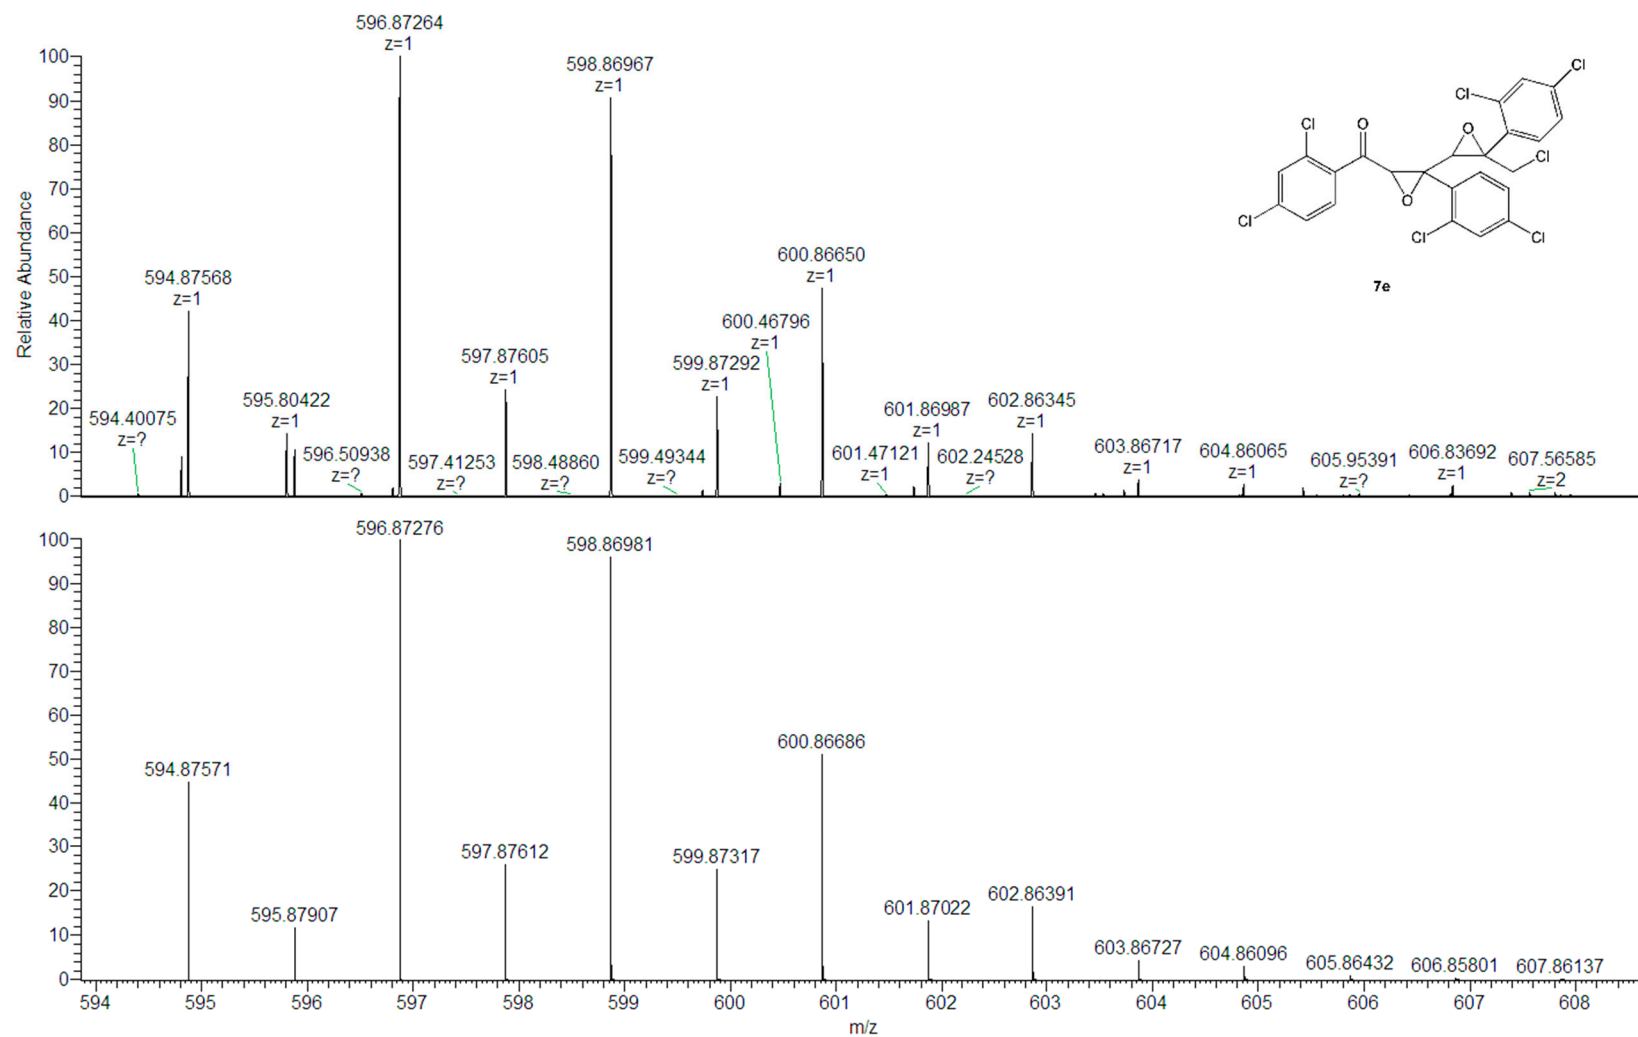



### Compound 8e

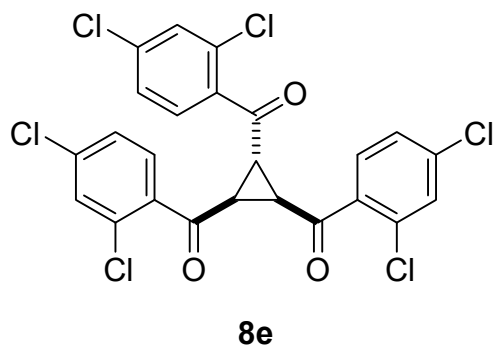

White solid, m.p. 122-123°C;  $R_f$  0.30;  $^1\text{H}$  NMR (500 MHz,  $\text{CDCl}_3$ )  $\delta$  = 3.73 (d,  $J$  = 5.62 Hz, 2H,  $\text{C}_3\text{HHH}$  *cis*), 3.87 (dd,  $J$  = 5.87 Hz,  $J$  = 5.38 Hz, 1H,  $\text{C}_3\text{HHH}$ ), 7.34 (dd,  $J$  = 8.56 Hz,  $J$  = 1.96 Hz, 2H,  $\text{C}_6\text{H}_2$ ), 7.39 (dd,  $J$  = 8.56 Hz,  $J$  = 1.96 Hz, 1H,  $\text{C}_6\text{H}_2$ ), 7.44 (d,  $J$  = 1.96 Hz, 2H,  $\text{C}_6\text{H}_2$ ), 7.49 (d,  $J$  = 1.71 Hz, 1H,  $\text{C}_6\text{H}_2$ ), 7.58 (d,  $J$  = 8.31 Hz, 2H,  $\text{C}_6\text{H}_2$ ), 7.63 (d,  $J$  = 8.31 Hz, 2H,  $\text{C}_6\text{H}_2$ );  $^{13}\text{C}$  NMR (125 MHz,  $\text{CDCl}_3$ )  $\delta$  = 36.76, 41.46, 127.60, 127.62, 130.51, 130.80, 121.17, 131.69, 132.89, 133.13, 135.87, 136.03, 138.64, 138.77, 193.96, 196.15; HRMS: calculated for  $\text{C}_{24}\text{H}_{13}\text{Cl}_6\text{O}_3$   $[\text{M}+\text{H}]^+$ : 562.89314. Found: 562.89302.

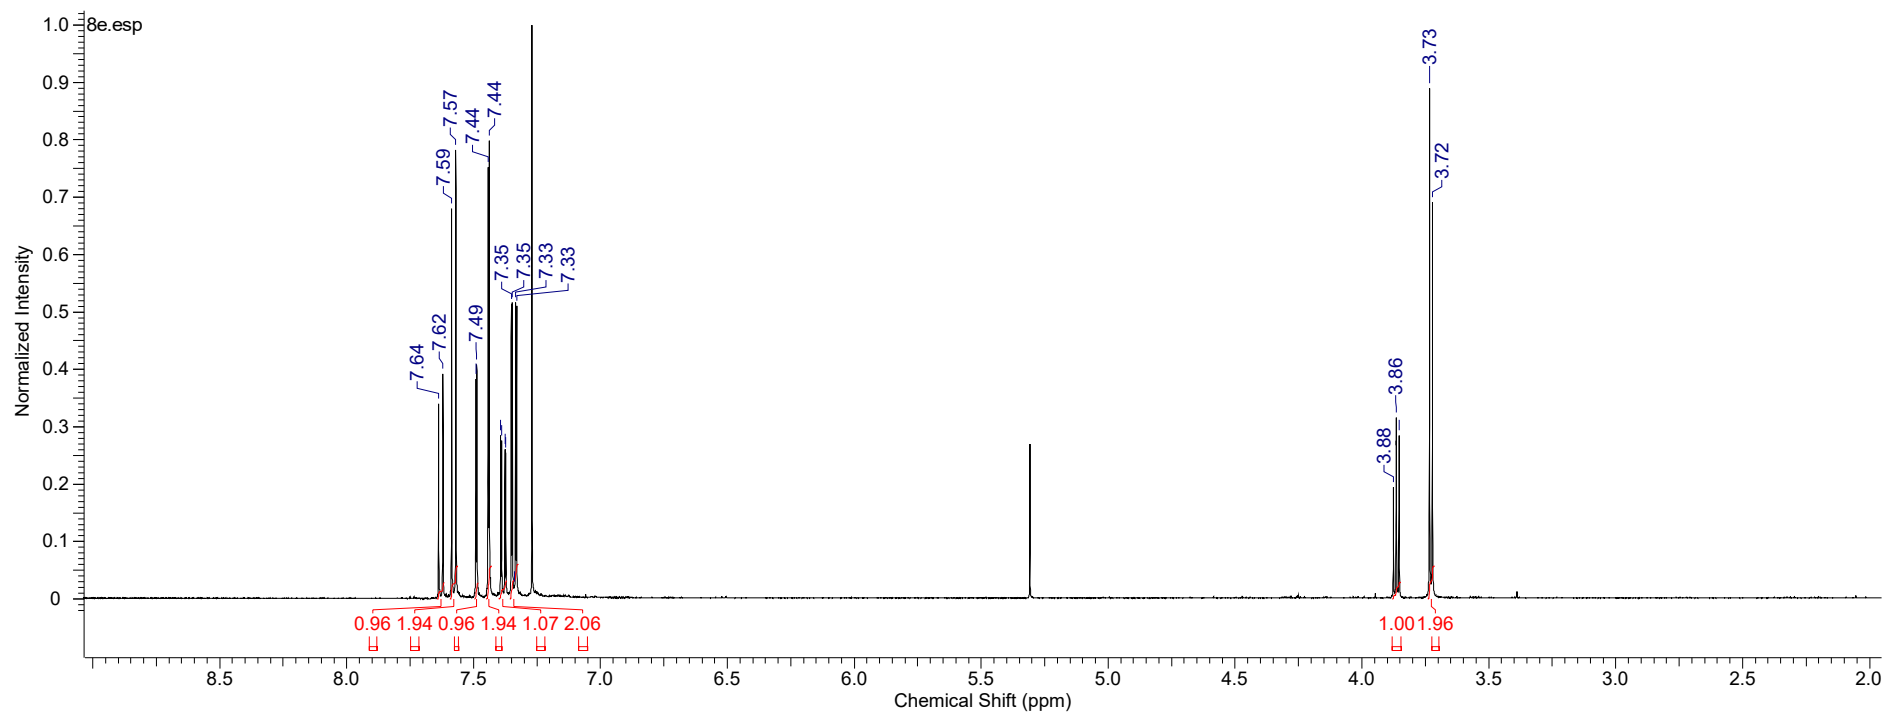

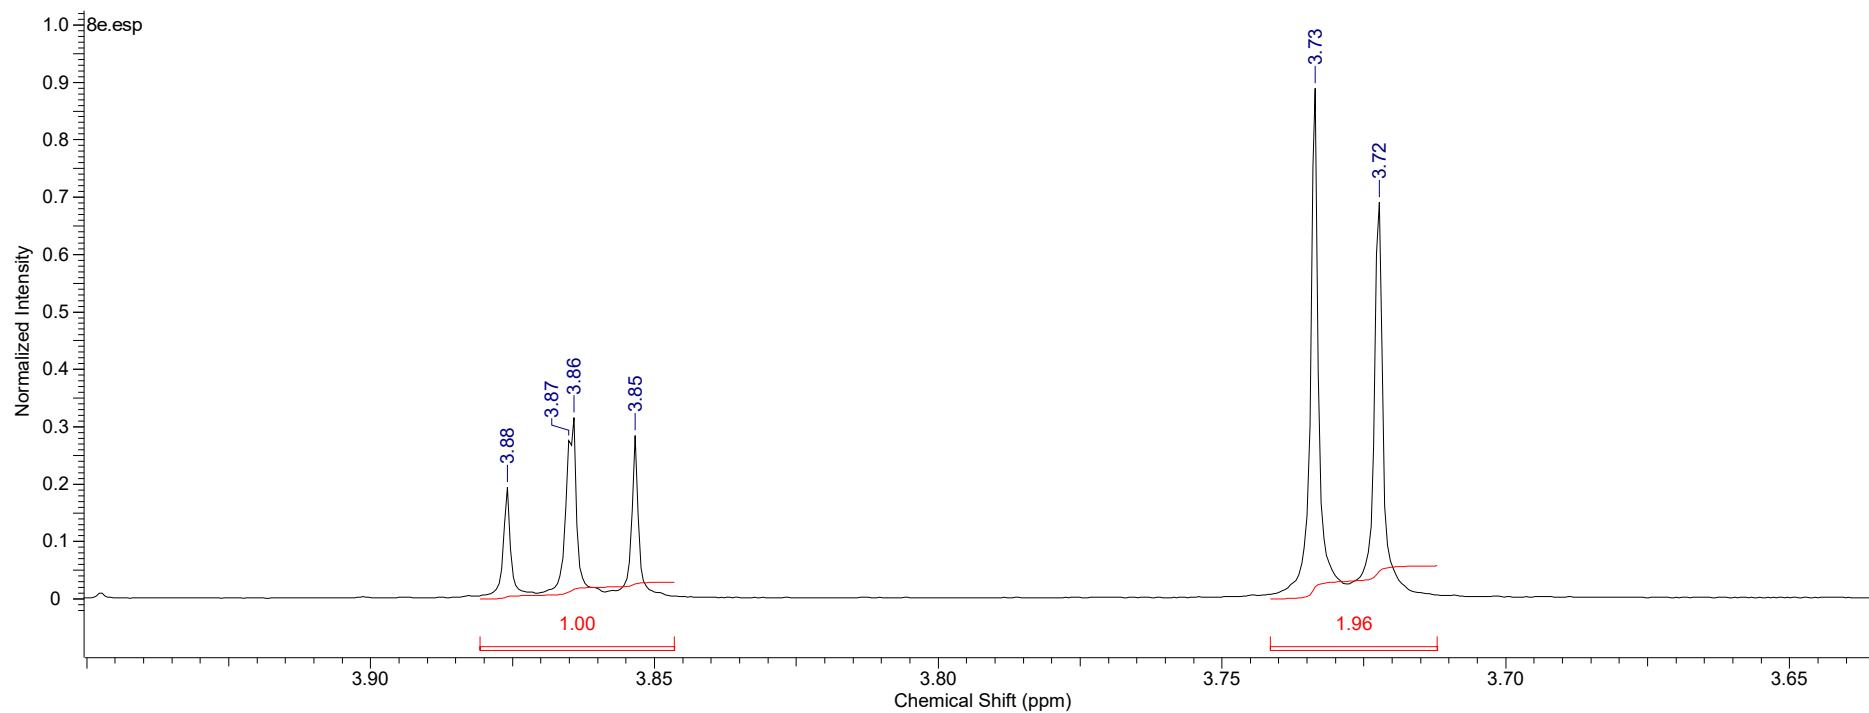

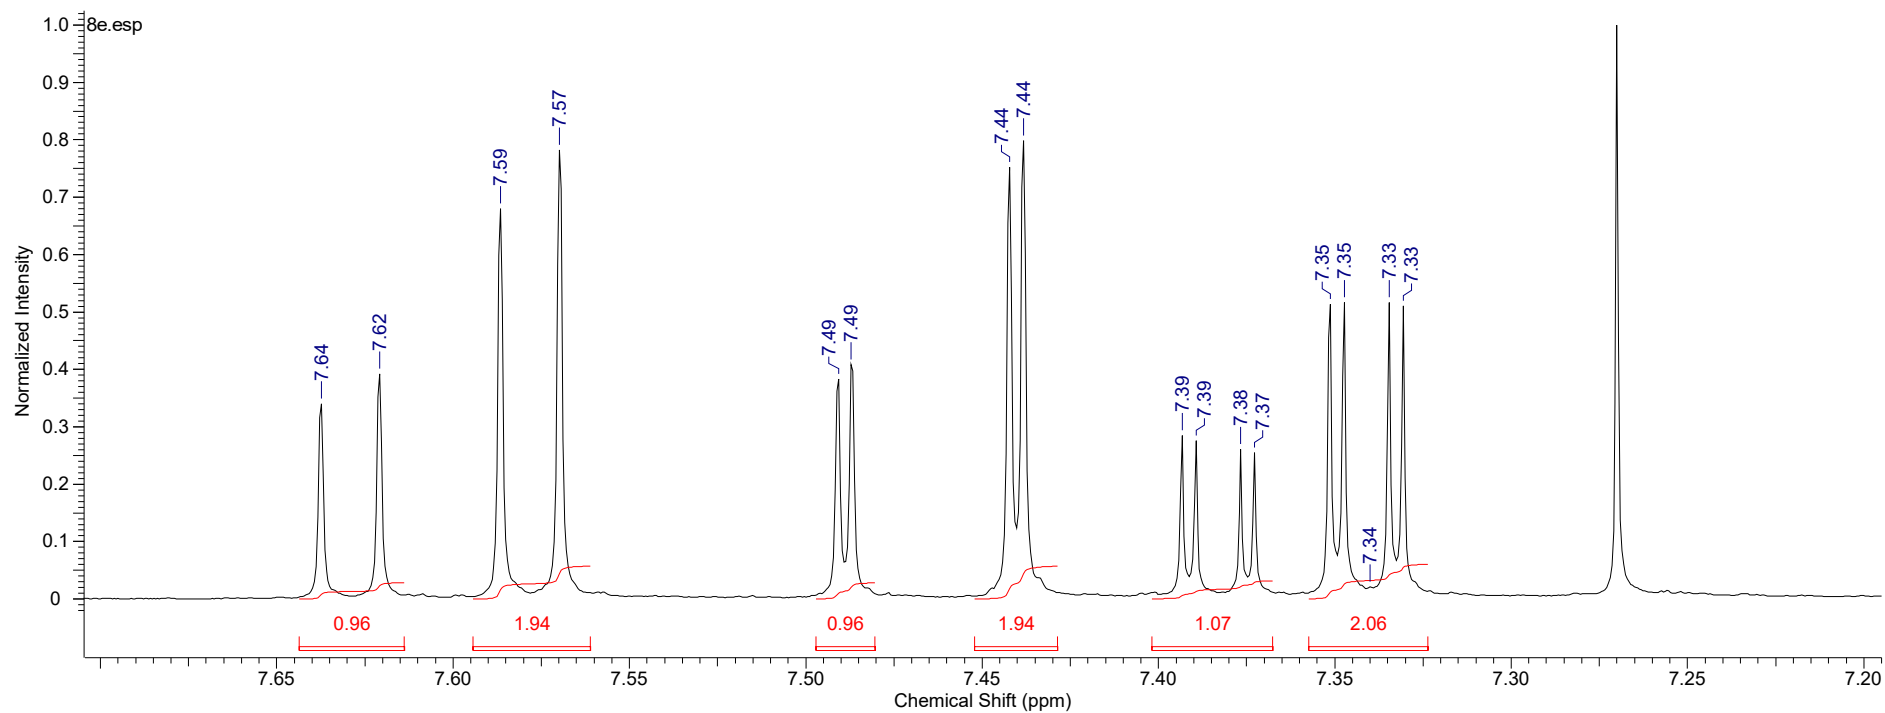

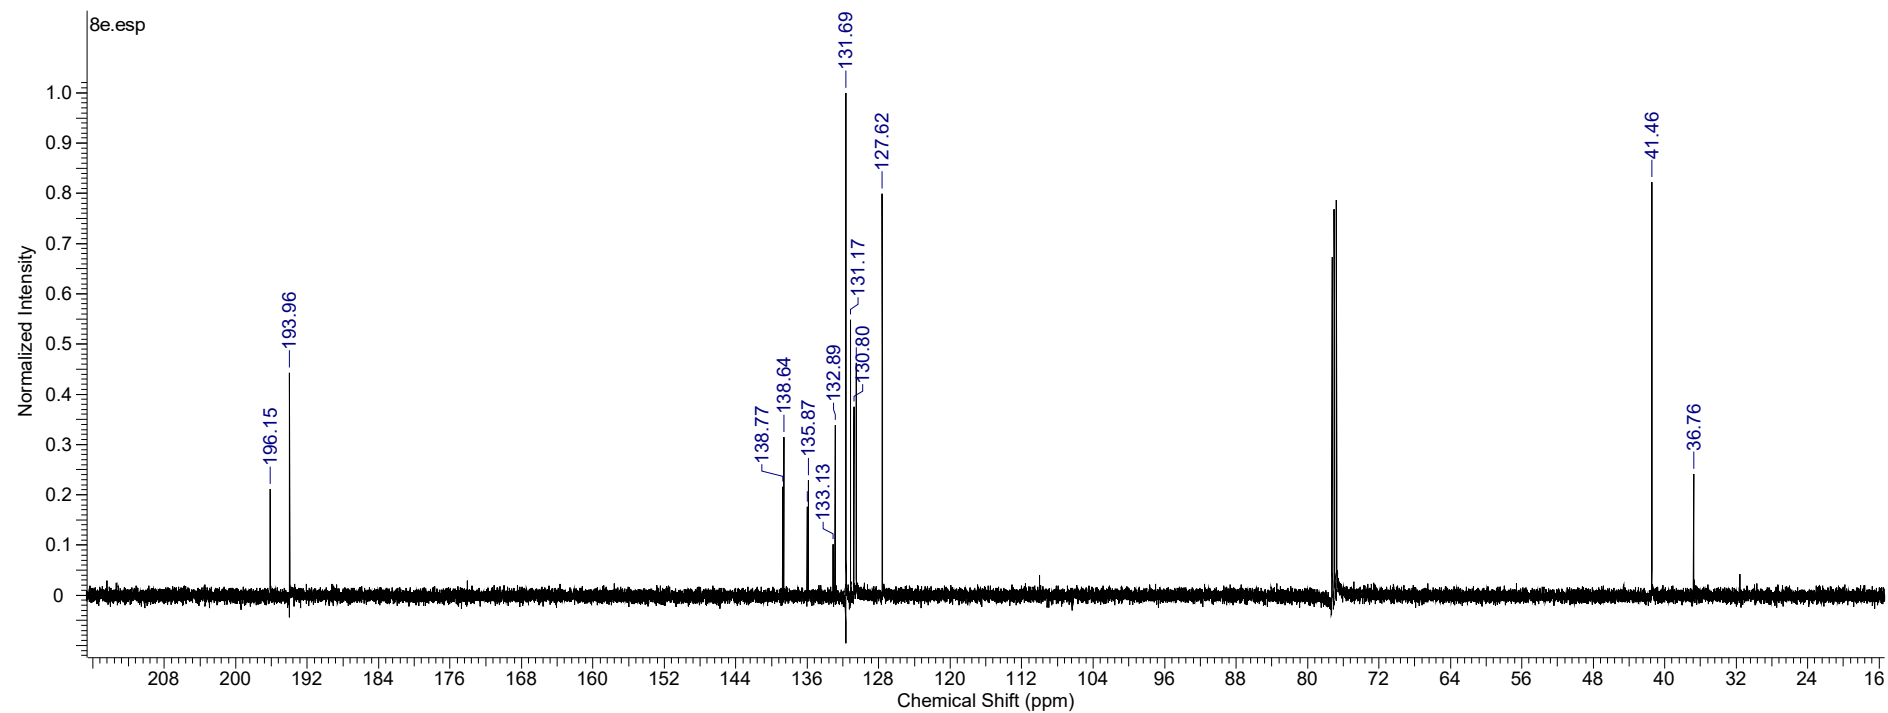

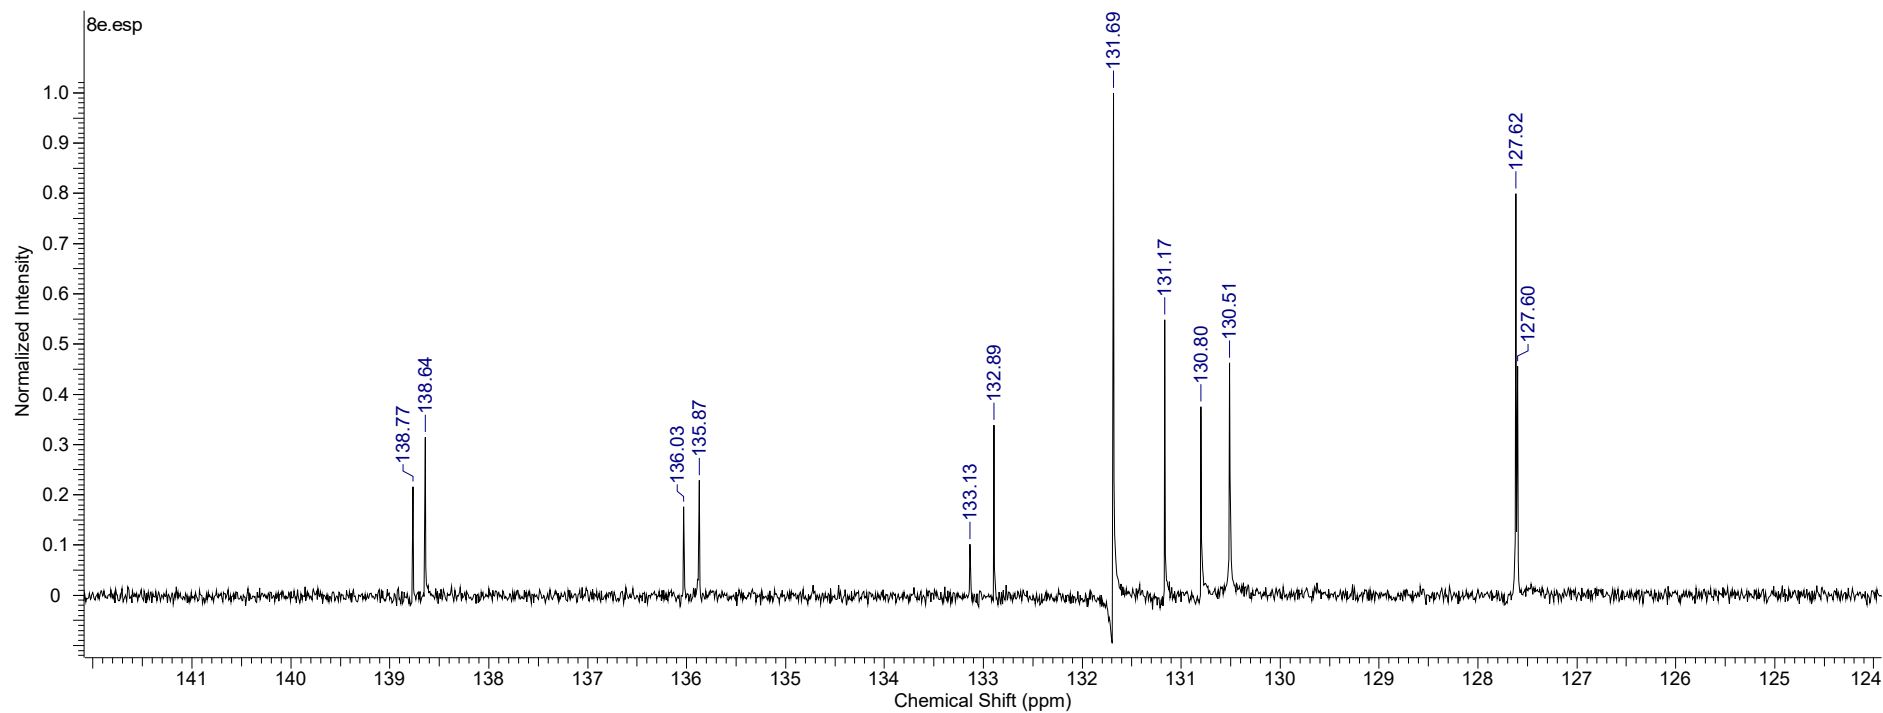

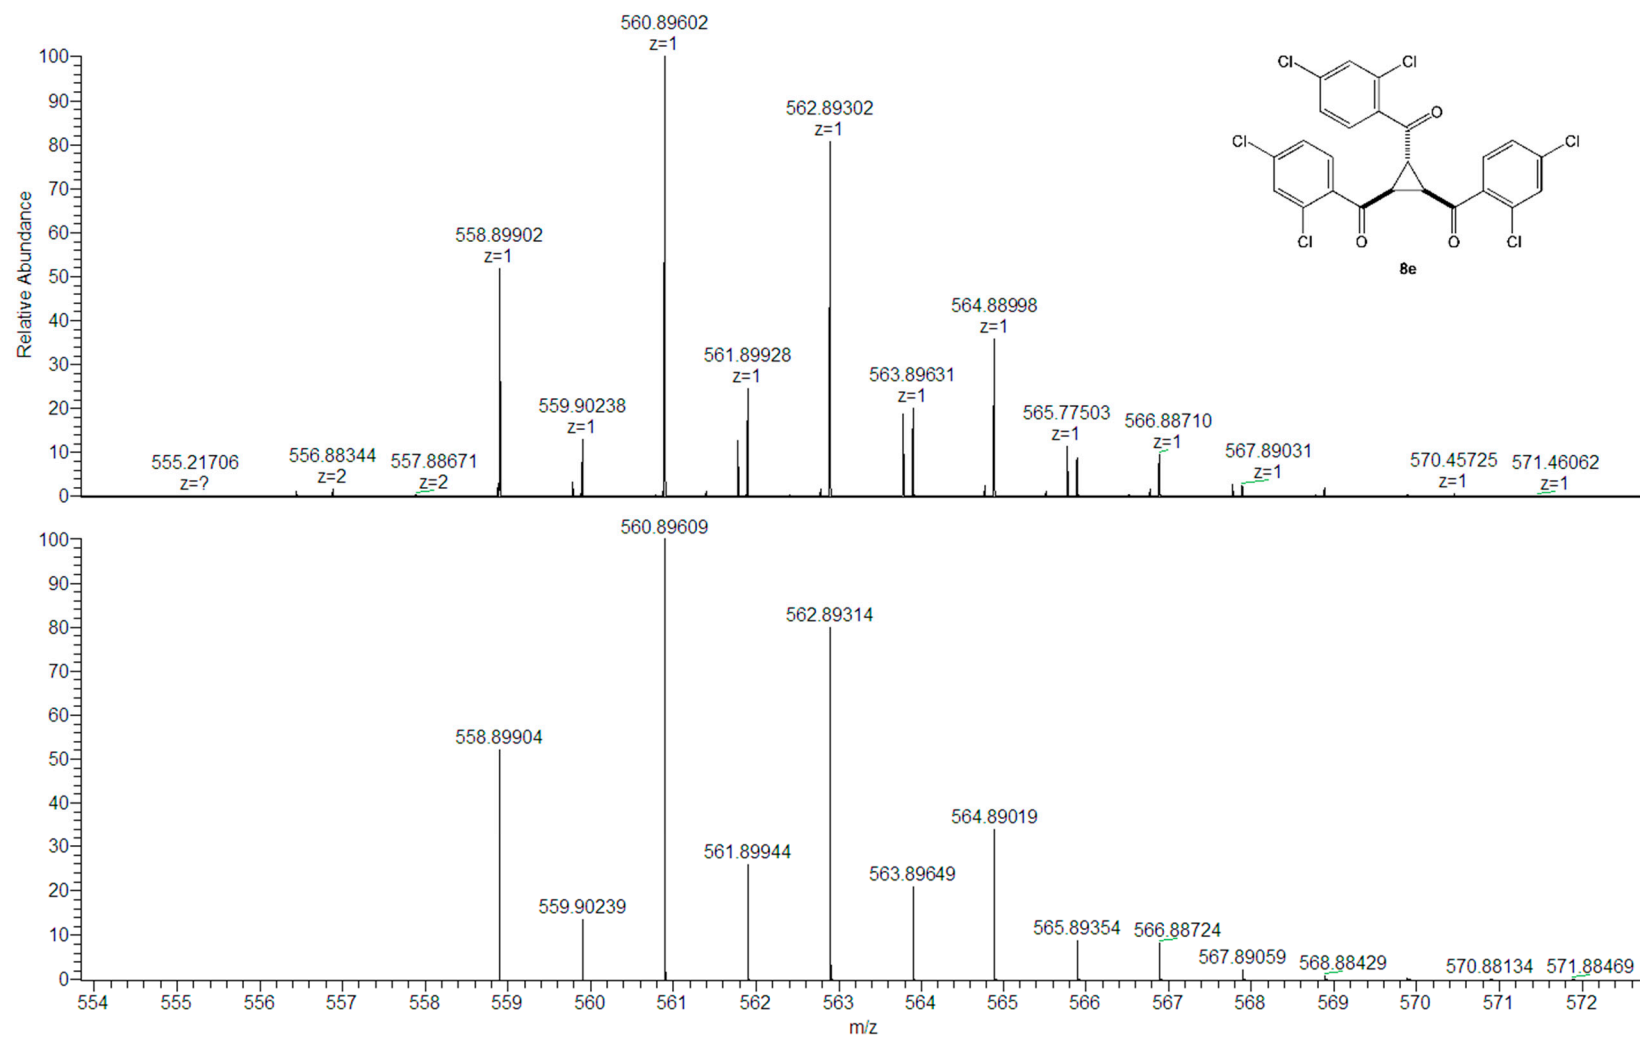

NL:  
 2.97E6  
 220421\_AK\_PROD\_5#  
 514-707 RT: 4.48-6.17  
 AV: 194 T: FTMS + p  
 ESI Full ms  
 [160.0000-2000.0000]

NL:  
 2.78E5  
 C<sub>24</sub>H<sub>12</sub>Cl<sub>6</sub>O<sub>3</sub> +H:  
 C<sub>24</sub>H<sub>13</sub>Cl<sub>6</sub>O<sub>3</sub>  
 pa Chrg 1

## 6. X-ray analysis of compound 5d

### X-ray experiment

Clear colorless crystal of 1-(4-bromophenyl)-2-(4,6-dibromo-1*H*-benzimidazol-1-yl)ethanone was placed on an Xcalibur R four circle diffractometer from Oxford Diffraction. After an initial crystal checking the approximate unit cell parameters, crystal system and symmetry were determined using the monochromatic Cu K $\alpha$  radiation. Consecutively 44722 reflections were collected up to  $2\theta=142.52^\circ$ . After initial corrections the data were used to solve and refine the crystal and molecular structure using SHELXS-97 and SHELXL-97 software, respectively (G.M. Sheldrick, Crystal structure refinement with SHELXL, Acta Crystallographica Section C: Structural Chemistry 71(1) (2015) 3-8). The compound crystallizes in the monoclinic  $P2_1/c$  space group with  $a=12.88814(8)$  Å,  $b=7.73580(5)$  Å,  $c=15.92832(13)$  Å and  $\beta=102.1558(7)^\circ$ . The number of independent molecules in the unit cell  $Z=4$ . The conformation of the molecule is shown in Figure S1.

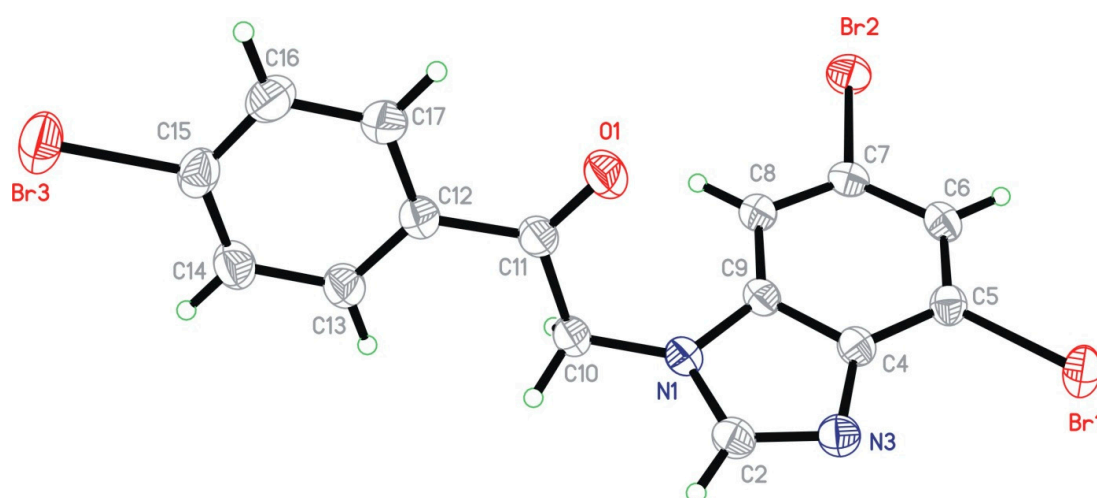

**Figure S1.** The ORTEP view of the molecule of 1-(4-bromophenyl)-2-(4,6-dibromo-1*H*-benzimidazol-1-yl)ethanone **5d**. The non hydrogen atoms are shown as 30% probability ellipsoids.

The crystal structure parameters have been deposited at the Cambridge Crystallographic Data Centre (deposition number CCDC 2171992). These data can be obtained free of charge via <http://www.ccdc.cam.ac.uk/conts/retrieving.html>.

**Table S1.** Crystal data and structure refinement for 1-(4-bromophenacyl)-4,6-dibromobenzimidazole (**5d**).

|                     |                                                                 |
|---------------------|-----------------------------------------------------------------|
| Identification code | CCDC 2171992                                                    |
| Empirical formula   | C <sub>15</sub> H <sub>9</sub> Br <sub>3</sub> N <sub>2</sub> O |
| Formula weight      | 472.97                                                          |
| Temperature         | 293(2) K                                                        |
| Wavelength          | 1.54184 Å                                                       |
| Crystal system      | Monoclinic                                                      |



|                                   |                                                 |
|-----------------------------------|-------------------------------------------------|
| Space group                       | P 1 21/c 1                                      |
| Unit cell dimensions              | a = 12.88814(8) Å, $\alpha$ = 90°.              |
|                                   | b = 7.73580(5) Å, $\beta$ = 102.1558(7)°.       |
|                                   | c = 15.92832(13) Å, $\gamma$ = 90°.             |
| Volume                            | 1552.448(19) Å <sup>3</sup>                     |
| Z                                 | 4                                               |
| Density (calculated)              | 2.024 Mg/m <sup>3</sup>                         |
| Absorption coefficient            | 9.638 mm <sup>-1</sup>                          |
| F(000)                            | 904                                             |
| Crystal size                      | 0.447 x 0.384 x 0.175 mm <sup>3</sup>           |
| Theta range for data collection   | 3.51 to 71.26°.                                 |
| Index ranges                      | -15 ≤ h ≤ 15, -9 ≤ k ≤ 9, -18 ≤ l ≤ 19          |
| Reflections collected             | 44722                                           |
| Independent reflections           | 3015 [R(int) = 0.0529]                          |
| Completeness to theta = 71.26°    | 99.5 %                                          |
| Absorption correction             | Analytical                                      |
| Max. and min. transmission        | 0.327 and 0.076                                 |
| Refinement method                 | Full-matrix least-squares on F <sup>2</sup>     |
| Data / restraints / parameters    | 3015 / 0 / 191                                  |
| Goodness-of-fit on F <sup>2</sup> | 1.072                                           |
| Final R indices [I > 2sigma(I)]   | R1 = 0.0288, wR2 = 0.0751                       |
| R indices (all data)              | R1 = 0.0330, wR2 = 0.0786                       |
| Extinction coefficient            | 0.00209(11)                                     |
| Largest diff. peak and hole       | 0.407 and -0.448 e <sup>-</sup> Å <sup>-3</sup> |

## 7. Biological tests

### MTT-based viability assay

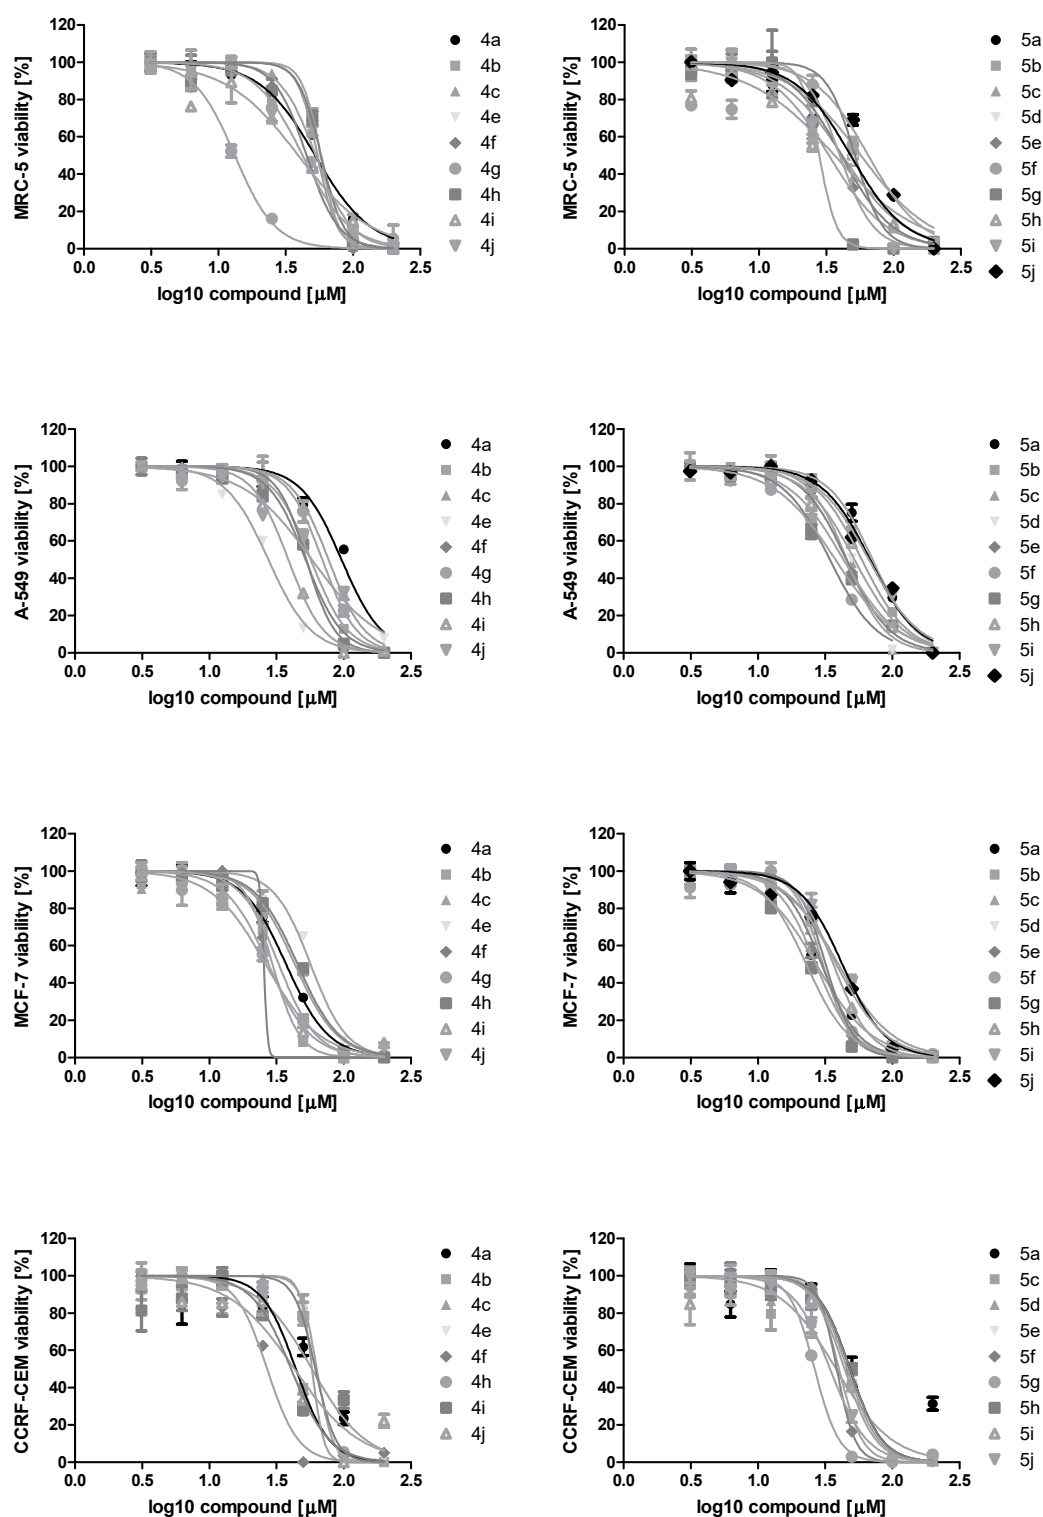

**Figure S2.** Representative sigmoidal dose-response curves for compounds **4a-4c**, **4e-4j** and **5a-5j** determined for MRC-5, A-549, MCF-7 and CCRF-CEM cell lines after 48 h of treatment. Plots were generated by GraphPad Prism after fitting the MTT data to sigmoidal dose response equation  $Y=100/(1+10^{((\text{LogIC}_{50}-X)*\text{HillSlope}))}$ .

## Cytometry

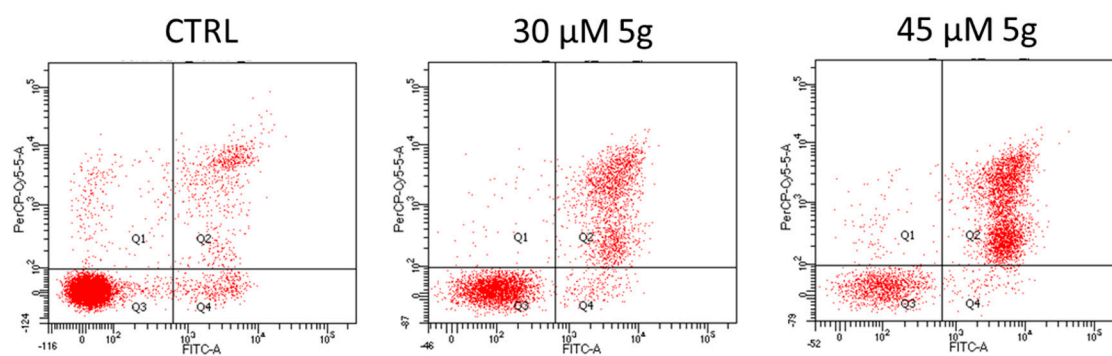

**Figure S3.** Representative cytograms for CCRF-CEM cells treated with compound **5g** for 48 h. Cells were stained with annexin V-FITC and PI (propidium iodide). Flow cytometry analyses were run on a FACSCanto II flow cytometer (BD Biosciences, San Diego, CA, USA) and analysed using BD FACSDiva software.
